# Supplementary material
Source: Royal Society of Chemistry journal article supplement (doi:10.1039/d6cc01311b)
Supplement: d6cc01311b1.pdf [file d6cc01311b1.pdf]

# Copper-Catalyzed Three-Component Radical Relay Alkenylation of Sulfenamides

Renkang Wei,<sup>+</sup> Jing Zhong,<sup>+</sup> Qian Wang, Yixin Wang, Hequan Yao,<sup>\*</sup> and Aijun Lin<sup>\*</sup>

State Key Laboratory of Natural Medicines (SKLNM) and Department of Medicinal Chemistry, School of Pharmacy, China Pharmaceutical University, Nanjing 210009, P. R. China

\*E-mail: hyao@cpu.edu.cn; ajlin@cpu.edu.cn.

## *Contents*

|                                                                                                                   |             |
|-------------------------------------------------------------------------------------------------------------------|-------------|
| <i>1. General Information</i> .....                                                                               | <i>S2</i>   |
| <i>2. General Procedure for the Preparation of Substrates</i> .....                                               | <i>S3</i>   |
| <i>3. General Procedure for Copper-Catalyzed Three-Component Radical Relay Alkenylation of Sulfenamides</i> ..... | <i>S9</i>   |
| <i>4. Synthetic Applications</i> .....                                                                            | <i>S65</i>  |
| <i>5. Mechanistic Studies</i> .....                                                                               | <i>S70</i>  |
| <i>6. Determination of the absolute configurations of 7</i> .....                                                 | <i>S74</i>  |
| <i>7. DFT calculations</i> .....                                                                                  | <i>S75</i>  |
| <i>8. <sup>1</sup>H, <sup>13</sup>C and <sup>19</sup>F NMR Spectra of Title Compounds</i> .....                   | <i>S125</i> |
| <i>9. References</i> .....                                                                                        | <i>S242</i> |

## ***1. General Information***

**Reagents and Solvents:** PE refers to petroleum ether b.p. 60–90 °C, EA refers to ethyl acetate, and DCM refers to dichloromethane. All other starting materials and solvents were commercially available and were used without further purification unless otherwise stated.

**Chromatography:** Flash column chromatography was carried out using commercially available 200–300 mesh under pressure unless otherwise indicated. Gradient flash chromatography was conducted eluting with PE/EA, they were listed as volume/volume ratios.

**Data collection:**  $^1\text{H}$ ,  $^{13}\text{C}$  and  $^{19}\text{F}$  NMR Spectrum were collected on BRUKER AV-300 (300 MHz) or BRUKER AV-400 (400 MHz) spectrometer using  $\text{CDCl}_3$  as solvent. Chemical shifts of  $^1\text{H}$  NMR were recorded in parts per million (ppm,  $\delta$ ) relative to tetramethylsilane ( $\delta = 0.00$  ppm) with the solvent resonance as an internal standard ( $\text{CDCl}_3$ :  $\delta = 7.26$  ppm). Data are reported as follows: chemical shift in ppm ( $\delta$ ), multiplicity (s = singlet, d = doublet, t = triplet, q = quartet, m = multiplet, br = broad), coupling constant (Hz), and integration. Chemical shifts of  $^{13}\text{C}$  NMR were reported in ppm with the solvent as the internal standard ( $\text{CDCl}_3$ :  $\delta = 77.16$  ppm). High Resolution Mass measurement was performed on Agilent Q-TOF 6520 mass spectrometer with electron spray ionization (ESI) as the ion source. Melting point (m.p.) was measured on a microscopic melting point apparatus. Optical rotations were measured on an Anton Paar MCP 100 automatic polarimeter with  $[\alpha]_{25}^{\text{D}}$  values reported in degrees; concentration (c) is in g/100 mL. The enantiomeric excess values were determined by chiral HPLC using Agilent 1200 LC or Shimadzu LC-40D instrument with Daicel CHIRALPAK<sup>®</sup> IA-3, IB-3, IC-3, AD-H, OD-H and AS-H columns. X-ray diffraction analyses were carried out on a microcrystalline powder using a Rigaku Oxford Diffraction XtaLAB Synergy-S diffractometer using or Cu radiation ( $\lambda = 1.54184 \text{ \AA}$ )

## 2. General Procedure for the Preparation of Substrates

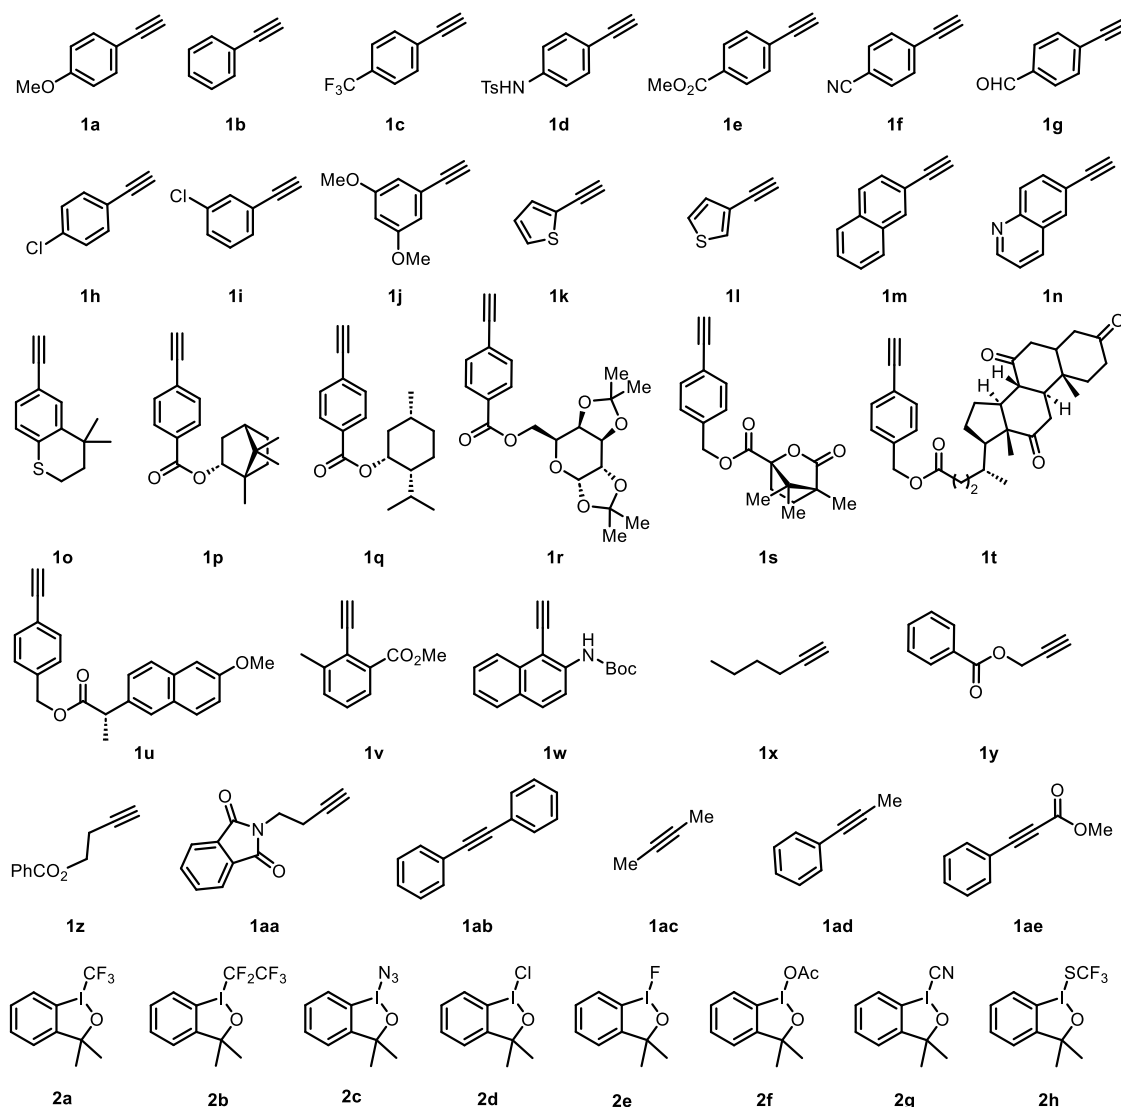

**Figure S1.** Structures of Substrates **1** and Substrates **2**

Except for **1s**, **1t** all other alkynes are known compounds. **1a–1o** are commercially available, **1p–1r** were prepared according to the reported procedures.<sup>1</sup> Both **2a** and **2b** are known compounds. **2a** are commercially available, **2b** were prepared according to the reported procedures.<sup>2</sup>

**General procedure A** for the synthesis **1s–1u**<sup>3</sup>

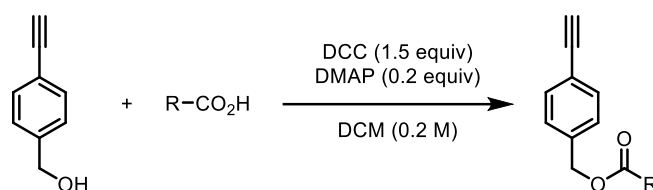

In a 50 mL round bottom flask, a mixture of dicyclohexylcarbodiimide (DCC) (1.55 g, 7.5 mmol), 4-dimethylaminopyridine (DMAP) (0.12 g, 1.0 mmol), acid (6.0 mmol, 1.2 equiv) and (4-ethynylphenyl) methanol (5.0 mmol) in CH<sub>2</sub>Cl<sub>2</sub> (25.0 mL) was stirred at room temperature for 12 h. After the completion of the reaction, the reaction was concentrated under reduced pressure. The residue was purified by column chromatography on silica gel using petroleum ether/ethyl acetate as an eluent to afford the corresponding ester compounds.

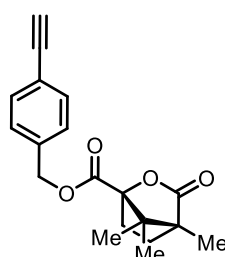

**4-ethynylbenzyl(1*S*,4*R*)-4,7,7-trimethyl-3-oxo-2-oxabicyclo[2.2.1]heptane-1-carboxylate (1*s*)**

Prepared according to General Procedure A. White solid, m.p. 92–94 °C.

<sup>1</sup>H NMR (400 MHz, CDCl<sub>3</sub>) δ 7.50 – 7.48 (m, 2H), 7.35 – 7.33 (m, 2H), 5.26 (s, 2H), 3.12 (s, 1H), 2.47 – 2.40 (m, 1H), 2.07 – 2.01 (m, 1H), 1.96 – 1.89 (m, 1H), 1.72 – 1.65 (m, 1H), 1.10 (s, 3H), 1.02 (s, 3H), 0.90 (s, 3H) ppm.

<sup>13</sup>C NMR (101 MHz, CDCl<sub>3</sub>) δ 178.0, 167.3, 135.8, 132.4, 128.3, 122.4, 91.0, 83.1, 78.0, 66.6, 54.8, 54.4, 30.7, 28.9, 16.8, 16.7, 9.7 ppm.

HRMS (ESI) calcd for [C<sub>19</sub>H<sub>20</sub>O<sub>4</sub>+H]<sup>+</sup> 313.1434, found 313.1430.

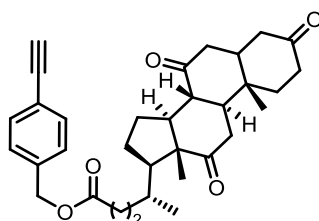

**4-ethynylbenzyl(4*R*)-4-((8*R*,9*S*,10*S*,13*R*,14*S*,17*R*)-10,13-dimethyl-3,7,12-trioxohexadecahydro-1*H*-cyclopenta[*a*]phenanthren-17-yl)pentanoate (1*t*)**

Prepared according to General Procedure A. White solid, m.p. 175–176 °C.

<sup>1</sup>H NMR (400 MHz, CDCl<sub>3</sub>) δ 7.49 – 7.47 (m, 2H), 7.32 – 7.30 (m, 2H), 5.14 – 5.06 (m, 2H), 3.10 (s, 1H), 2.94 – 2.80 (m, 3H), 2.49 – 2.42 (m, 1H), 2.38 – 2.23 (m, 6H), 2.16 – 2.09 (m, 2H), 2.06 – 1.99 (m, 3H), 1.95 – 1.93 (m, 1H), 1.88 – 1.80 (m, 2H), 1.66 – 1.57 (m, 1H), 1.45 – 1.22 (m, 8H), 1.03 (s, 3H), 0.84 (d, *J* = 6.6 Hz, 3H) ppm.

**<sup>13</sup>C NMR** (101 MHz, CDCl<sub>3</sub>) δ 212.0, 209.2, 208.8, 173.8, 136.9, 132.4, 128.1, 122.0, 83.3, 65.6, 57.0, 51.8, 49.1, 46.9, 45.7, 45.6, 45.1, 42.9, 38.7, 36.6, 36.1, 35.5, 35.4, 34.1, 31.6, 30.5, 27.7, 25.7, 25.2, 25.1, 22.0, 18.7, 11.9 ppm.

**HRMS** (ESI) calcd for [C<sub>33</sub>H<sub>40</sub>O<sub>5</sub>+H]<sup>+</sup> 517.2949, found 517.2943.

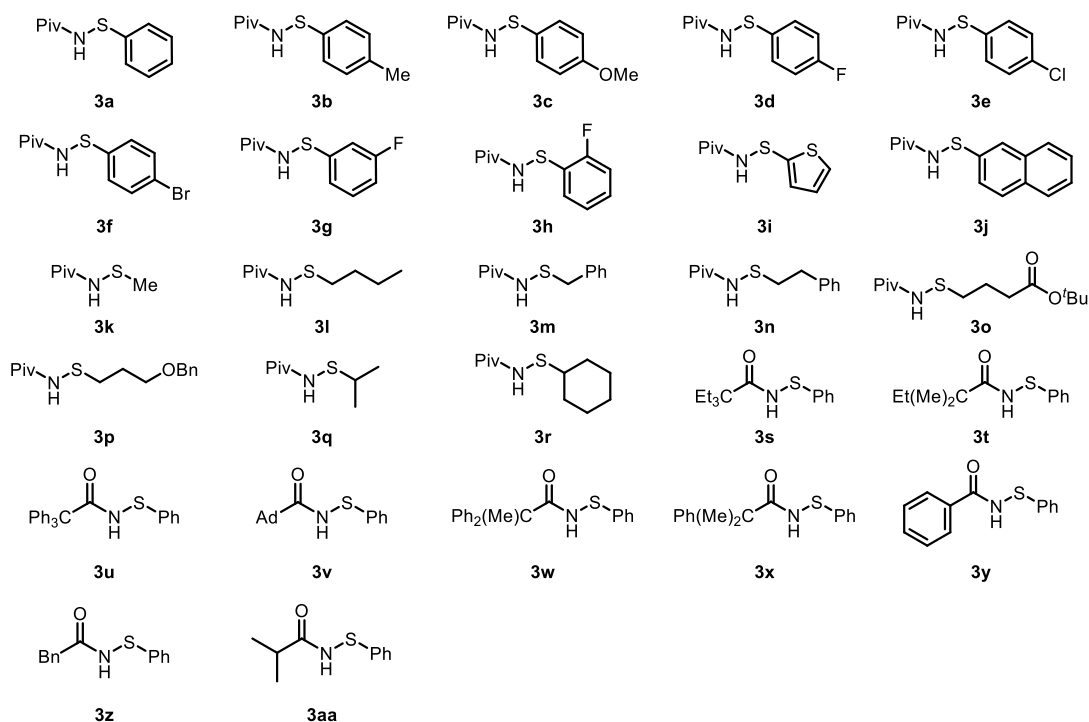

**Figure S2.** Structures of Substrates **3**

All sulfenamides are known compounds. **3a–3j**, **3l**, **3m**, **3r** were prepared according to the reported procedures.<sup>4</sup> **3k** were prepared according to the reported procedures.<sup>5</sup> **3q** were prepared according to the reported procedures.<sup>6</sup> **3s**, **3t** were prepared according to the reported procedure.<sup>7</sup> **3u** were prepared according to the reported procedures.<sup>8</sup> **3v** were prepared according to the reported procedures.<sup>9</sup> **3y–3aa** were prepared according to the reported procedure.<sup>10</sup>

**General procedure B** for the synthesis **3n–3p**

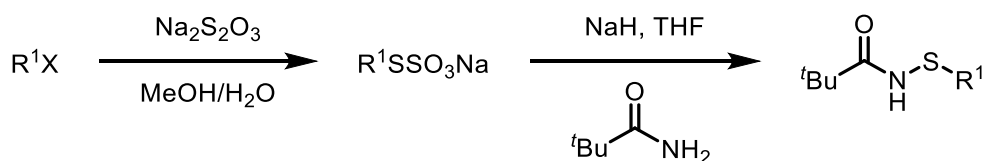

A flask was charged with alkyl halide (50.0 mmol), sodium thiosulfate pentahydrate (14.9 g, 60.0 mmol), water (25.0 mL) and MeOH (75.0 mL). The reaction mixture was stirred and heated to 65 °C, and then was cooled to room temperature until the reaction was complete determined via HPLC-MS analysis. The solution was concentrated to remove MeOH and water. The resultant solid was treated with MeOH (250.0 mL), heated to 50 °C (most solid dissolves), and filtered through a medium stone frit filter. This removes excess sodium thiosulfate and sodium halide. The filtrate was concentrated to a white solid, the crude Bunte salt was used in the next step without purification.

To a flame-dried round bottom flask under N<sub>2</sub> was added the pivalamide (10.0 mmol) and dry THF (100.0 mL). The flask was cooled to 0 °C and NaH (60% dispersion in mineral oil, 1.0 g, 25.0 mmol) was added. The solution was warmed to room

temperature for 30 min, then cooled to 0 °C. Bunte salt (30.0 mmol) was added in three batches until the reaction was complete as determined by TLC. The reaction was quenched with saturated NH<sub>4</sub>Cl before water was added. The mixture was extracted with ethyl acetate (three times). The combined organic layers were washed with brine, dried over sodium sulfate, and concentrated. Purification of the residue by the flash silica gel column chromatography afforded the desired *S*-alkyl sulfenamides.

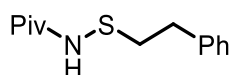

***N*-(phenethylthio)pivalamide (3n)**

Prepared according to General Procedure C. White solid, m.p. 68–70 °C.

<sup>1</sup>H NMR (300 MHz, CDCl<sub>3</sub>) δ 7.36 – 7.26 (m, 2H), 7.26 – 7.18 (m, 3H), 6.35 (s, 1H), 3.06 – 2.95 (m, 2H), 2.95 – 2.86 (m, 2H), 1.16 (s, 9H) ppm.

<sup>13</sup>C NMR (75 MHz, CDCl<sub>3</sub>) δ 180.3, 140.2, 128.68, 128.65, 126.6, 40.1, 39.8, 35.0, 27.7 ppm.

HRMS (ESI) calcd for [C<sub>13</sub>H<sub>19</sub>NOS+H]<sup>+</sup> 238.1260, found 238.1260.

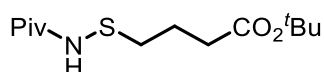

***tert*-butyl 4-(pivalamidothio) butanoate (3o)**

Prepared according to General Procedure C. White solid, m.p. 50–52 °C.

<sup>1</sup>H NMR (300 MHz, CDCl<sub>3</sub>) δ 6.73 (s, 1H), 2.70 (t, *J* = 6.7 Hz, 2H), 2.37 (t, *J* = 6.6 Hz, 2H), 1.88 (p, *J* = 6.6 Hz, 2H), 1.46 (s, 9H), 1.25 (s, 9H) ppm.

<sup>13</sup>C NMR (75 MHz, CDCl<sub>3</sub>) δ 180.5, 173.5, 80.7, 39.9, 38.0, 34.1, 28.1, 27.8, 21.9 ppm.

HRMS (ESI) calcd for [C<sub>13</sub>H<sub>25</sub>NO<sub>3</sub>S+H]<sup>+</sup> 298.1447, found 298.1446.

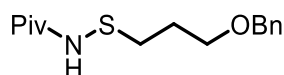

***N*-((3-(benzyloxy)propyl)thio) pivalamide (3p)**

Prepared according to General Procedure C. light yellow oil.

<sup>1</sup>H NMR (300 MHz, CDCl<sub>3</sub>) δ 7.42 – 7.21 (m, 5H), 6.56 (s, 1H), 4.50 (s, 2H), 3.61 (t, *J* = 5.9 Hz, 2H), 2.83 (t, *J* = 7.0 Hz, 2H), 1.96 – 1.80 (m, 2H), 1.18 (s, 9H) ppm.

<sup>13</sup>C NMR (75 MHz, CDCl<sub>3</sub>) δ 180.5, 138.3, 128.5, 127.8, 127.7, 73.1, 68.7, 39.8, 35.9, 27.9, 27.7 ppm.

HRMS (ESI) calcd for [C<sub>15</sub>H<sub>23</sub>NO<sub>2</sub>S+H]<sup>+</sup> 282.1522, found 282.1522.

**General procedure C for the synthesis 3w, 3s**

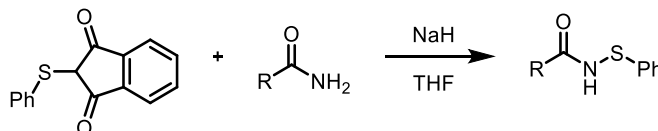

To a flame-dried round bottom flask under N<sub>2</sub> was added the Amines (5.0 mmol) and dry THF (50.0 mL). The flask was cooled to 0 °C before NaH (60% dispersion in mineral oil, 0.5 g, 12.5 mmol) was added. The resulting mixture warmed to r.t. and stirred for 30 min and then *N*-thiosuccinimide (5.0 mmol) was added at 0 °C. The mixture was warmed to room temperature. and stirred until reaction completion as assessed by TLC. The reaction mixture was added saturated NH<sub>4</sub>Cl and water, and extracted with ethyl acetate. The combined organic layers were washed with brine, dried over sodium sulfate, and concentrated. Purification by the flash silica gel column chromatography afforded the desired sulfonamides.

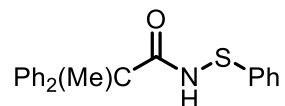

***2,2-diphenyl-N-(phenylthio)propanamide (3w)***

Prepared according to General Procedure C. white solid. m.p. 118–120 °C.

<sup>1</sup>H NMR (400 MHz, CDCl<sub>3</sub>) δ 7.34 – 7.12 (m, 15H), 6.63 (s, 1H), 2.01 (s, 3H) ppm.

<sup>13</sup>C NMR (101 MHz, CDCl<sub>3</sub>) δ 176.7, 144.1, 138.4, 129.0, 128.8, 128.2, 127.4, 127.2, 126.3, 58.0, 27.8 ppm.

HRMS (ESI) calcd for [C<sub>21</sub>H<sub>19</sub>NOS +H]<sup>+</sup> 334.1260, found 334.1267.

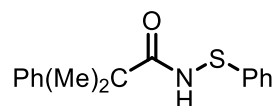

***2-methyl-2-phenyl-N-(phenylthio)propanamide (3x)***

Prepared according to General Procedure C. white solid. m.p. 96–98 °C.

<sup>1</sup>H NMR (300 MHz, CDCl<sub>3</sub>) δ 7.40 – 7.06 (m, 10H), 6.37 (s, 1H), 1.62 (s, 6H) ppm.

<sup>13</sup>C NMR (75 MHz, CDCl<sub>3</sub>) δ 178.9, 144.1, 138.9, 129.0, 128.9, 127.5, 126.7, 126.4, 125.2, 48.0, 27.1 ppm.

HRMS (ESI) calcd for [C<sub>16</sub>H<sub>17</sub>NOS +H]<sup>+</sup> 272.1104, found 272.1103.

### 3. Copper-Catalyzed Three-Component Radical Relay Alkenylation of Sulfenamides

#### 3.1 Optimization of reaction conditions<sup>d</sup>

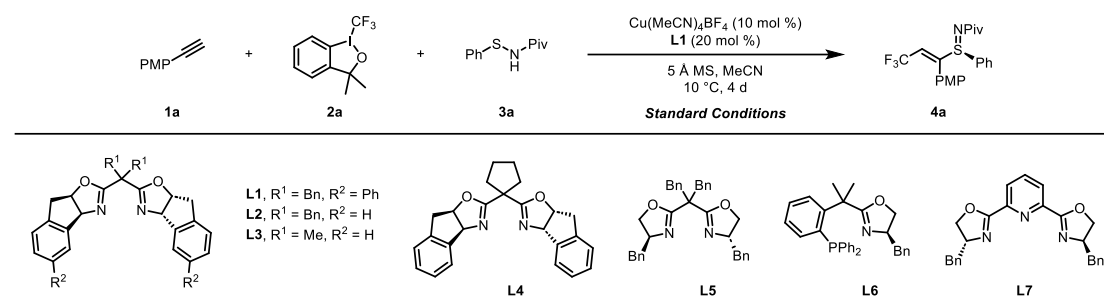

| Entry | Variation from standard conditions                                    | Yield (%) <i>E/Z</i> <sup>b</sup> | Ee (%) <sup>c</sup> |
|-------|-----------------------------------------------------------------------|-----------------------------------|---------------------|
| 1     | none                                                                  | 86 <sup>d</sup> (> 20:1)          | 96                  |
| 2     | <b>L2</b> instead of <b>L1</b>                                        | 68 (> 20:1)                       | 89                  |
| 3     | <b>L3</b> instead of <b>L1</b>                                        | 48 (> 20:1)                       | 7                   |
| 4     | <b>L4</b> instead of <b>L1</b>                                        | 32 (> 20:1)                       | 5                   |
| 5     | <b>L5</b> instead of <b>L1</b>                                        | 58 (> 20:1)                       | 82                  |
| 6     | <b>L6</b> instead of <b>L1</b>                                        | ND                                | -                   |
| 7     | <b>L7</b> instead of <b>L1</b>                                        | ND                                | -                   |
| 8     | CuI instead of Cu(MeCN) <sub>4</sub> BF <sub>4</sub>                  | 18 (3:1)                          | 70                  |
| 9     | Cu(OTf) <sub>2</sub> instead of Cu(MeCN) <sub>4</sub> BF <sub>4</sub> | 62 (> 20:1)                       | 95                  |
| 10    | DCM as solvent                                                        | 96 (> 20:1)                       | 70                  |
| 11    | THF as solvent                                                        | 38 (7:1)                          | 75                  |
| 12    | 25 °C                                                                 | 87 (> 20:1)                       | 88                  |
| 13    | w/o 5 Å MS                                                            | 72 (> 20:1)                       | 96                  |
| 14    | 2 d                                                                   | 70 (> 20:1)                       | 96                  |

<sup>a</sup>Reaction conditions: **1a** (0.10 mmol), **2a** (0.15 mmol), **3a** (0.20 mmol), Cu(MeCN)<sub>4</sub>BF<sub>4</sub> (10 mol %), **L1** (20 mol %) and 5 Å MS (50 mg) in MeCN (1.0 mL) at 10 °C under Ar atmosphere, 4 d. <sup>b</sup>Yields were determined by <sup>19</sup>F NMR using CF<sub>3</sub>-DMAc as internal standard. The *E/Z* ratio determined by <sup>19</sup>F NMR analysis. <sup>c</sup>Determined by chiral HPLC analysis. <sup>d</sup>Isolated yield. PMP = *p*-methoxyphenyl. Piv = *tert*-butylcarbonyl. ND = not detected. w/o = without.

**Table S1.** Optimization of reaction conditions

We initiated our study with *p*-methoxyphenylacetylene (**1a**), Togni reagent (**2a**), and sulfenamide (**3a**) as the model substrates. After systematic optimization, we determined that the combination of Cu(MeCN)<sub>4</sub>BF<sub>4</sub> (10 mol %), **L1** (20 mol %) and 5 Å molecular sieves (50 mg) in MeCN (1.0 mL) at 10 °C for 4 days was the optimal condition, delivering **4a** in 86% isolated yield with 96% ee and > 20:1 *E*-selectivity (**Table S1**, entry 1). Bulky substituents at the ligand's methylene position were critical for

enantiocontrol, replacement of the benzyl group with other substituents gave nearly racemic products (**Table S1**, entries 3 and 4). Moreover, reducing the steric bulk of the overall ligand framework lowered enantioselectivity (**Table S1**, entries 2 and 5). No desired product was observed when N-P or Pybox-type ligands were employed (**Table S1**, entries 6 and 7). Utilizing CuI as the catalyst afforded **4a** in 18% yield with 70% ee and 3:1 *E*-selectivity (**Table S1**, entry 8), whereas Cu(OTf)<sub>2</sub> gave 62% yield and > 20:1 *E*-selectivity (**Table S1**, entry 9). Other solvents, such as DCM and THF furnished **4a** with 70% and 75% ee, respectively (**Table S1**, entries 10 and 11). Conducting the reaction at 25 °C diminished enantioselectivity (**Table S1**, entry 12). Omitting 5 Å molecular sieves or shortening the reaction time compromised the product yield (**Table S1**, entries 13 and 14).

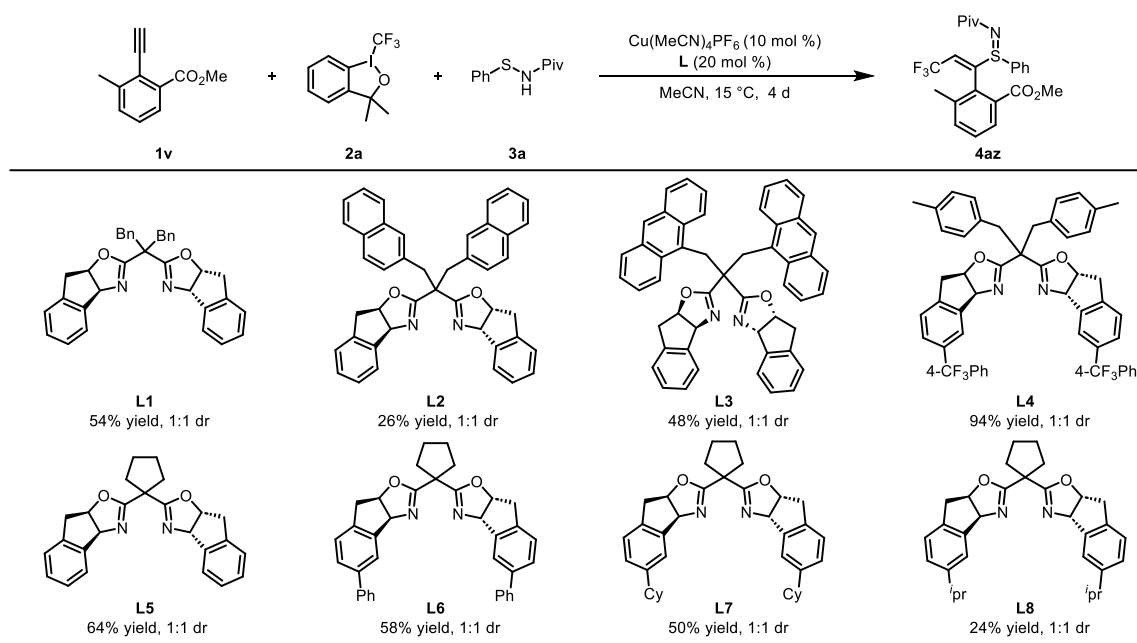

<sup>a</sup>Reaction conditions: **1v** (0.10 mmol), **2a** (0.15 mmol), **3a** (0.20 mmol),  $\text{Cu}(\text{MeCN})_4\text{PF}_6$  (10 mol %), **L** (20 mol %) and in MeCN (1.0 mL) at 10 °C under Ar atmosphere, 4 d. The *dr* ratio was determined by <sup>19</sup>F NMR analysis.

**Table S2.** Ligand screening with **1v**

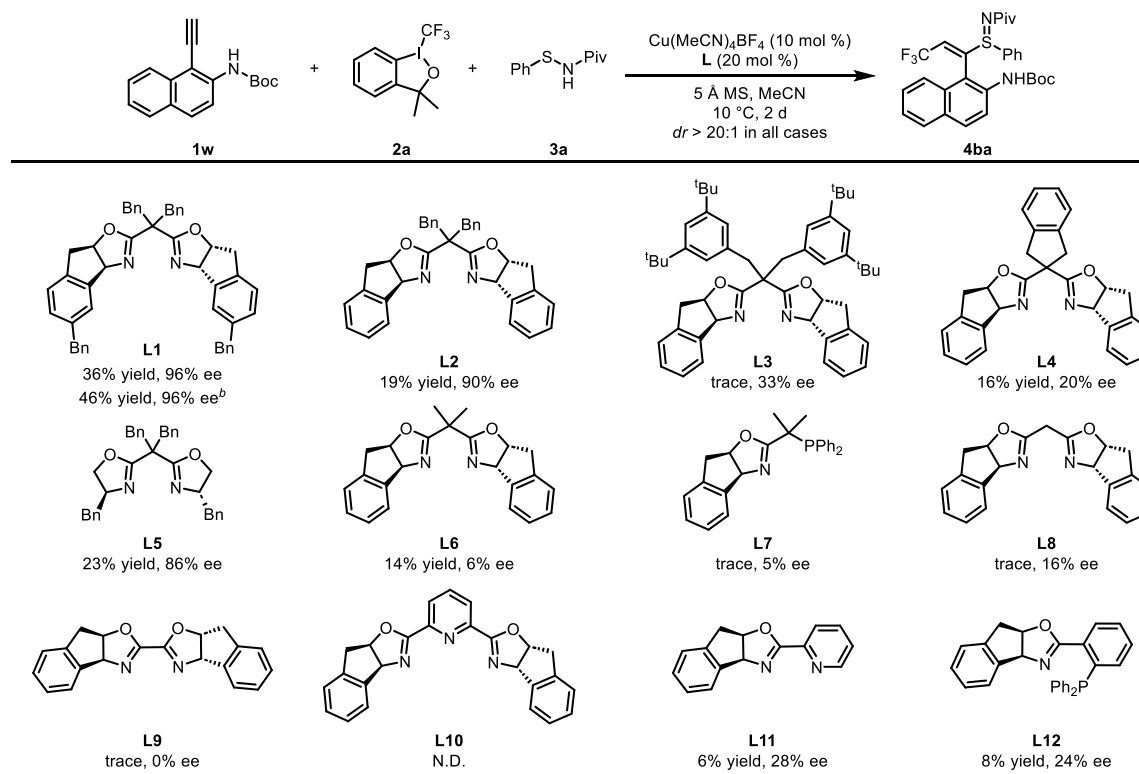

<sup>a</sup>Reaction conditions: **1w** (0.10 mmol), **2a** (0.15 mmol), **3a** (0.20 mmol),  $\text{Cu}(\text{MeCN})_4\text{BF}_4$  (10 mol %), **L** (20 mol %) and 5 Å MS (50 mg) in MeCN (1.0 mL) at 10 °C under Ar atmosphere, 2 d. N.D. = not detected. The *ee* values were determined by chiral HPLC analysis. Yields were determined by <sup>19</sup>F NMR using CF<sub>3</sub>-DMAc as internal standard. The *dr* ratio was determined by <sup>19</sup>F NMR analysis. <sup>b</sup>4d, Isolated yields were given.

**Table S3.** Ligand screening with **1w**

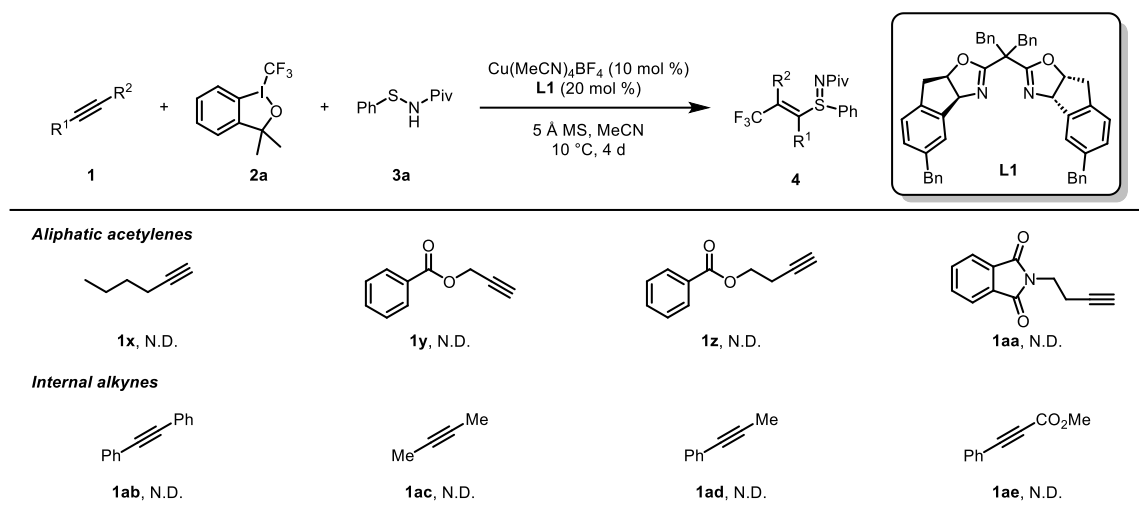

<sup>a</sup>Reaction conditions: **1** (0.10 mmol), **2a** (0.15 mmol), **3a** (0.20 mmol),  $\text{Cu}(\text{MeCN})_4\text{BF}_4$  (10 mol %), **L1** (20 mol %) and in MeCN (1.0 mL) at 10 °C under Ar atmosphere, 4 d. N.D. = not detected.

**Table S4.** Aliphatic acetylenes and internal alkynes screening

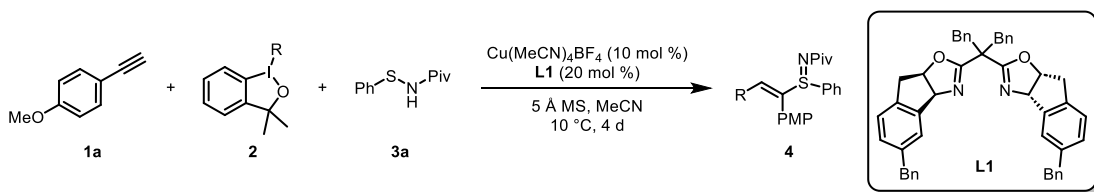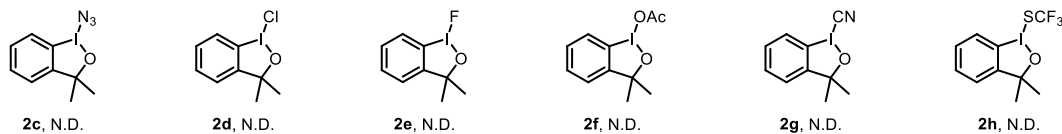

<sup>a</sup>Reaction conditions: **1a** (0.10 mmol), **2** (0.15 mmol), **3a** (0.20 mmol), Cu(MeCN)<sub>4</sub>BF<sub>4</sub> (10 mol %), **L1** (20 mol %) and in MeCN (1.0 mL) at 10 °C under Ar atmosphere, 4 d. N.D. = not detected.

**Table S5.** Hypervalent iodine reagents screening

### 3.2 General Procedure

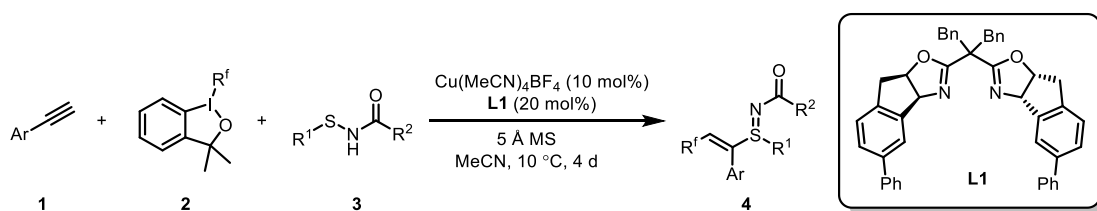

A sealed tube was charged with **2** (0.15 mmol, 1.5 equiv), **3** (0.2 mmol, 2.0 equiv), Cu(MeCN)<sub>4</sub>BF<sub>4</sub> (3.2 mg, 0.01 mmol, 10 mol%), **L1** (13.2 mg, 0.02 mmol, 20 mol%), 5 Å MS (50.0 mg), the vial was thoroughly flushed with Ar, **1** (0.1 mmol, 1.0 equiv) and MeCN (1.0 mL) was added via a syringe under Ar atmosphere. The reaction mixture was vigorously stirred at 10 °C for 4 d. The reaction mixture was diluted with EA (2.0 mL) and filtered through a plug of Celite. The filtrate was washed with water and brine, dried over anhydrous Na<sub>2</sub>SO<sub>4</sub>, and concentrated under vacuum to give dark residue, which was purified by flash chromatography on silica gel to afford products **4**.

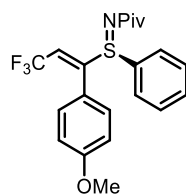

***N-((S)-phenyl((E)-3,3,3-trifluoro-1-(4-methoxyphenyl)prop-1-en-1-yl)-λ<sup>4</sup>-sulfaneylidene)pivalamide (4a)***

35.2 mg, 86% yield, 96% ee, *E/Z* > 20/1, colorless oil.

$[\alpha]_{25}^D = +87.1$  ( $c = 0.071$ ,  $\text{CHCl}_3$ ).

<sup>1</sup>H NMR (300 MHz,  $\text{CDCl}_3$ )  $\delta$  7.49 – 7.43 (m, 3H), 7.39 – 7.32 (m, 2H), 7.00 – 6.95 (m, 2H), 6.82 – 6.69 (m, 3H), 3.80 (s, 3H), 1.31 (s, 9H) ppm.

<sup>13</sup>C NMR (75 MHz,  $\text{CDCl}_3$ )  $\delta$  190.6, 161.2, 150.2 ( $q, {}^3J_{\text{C-F}} = 5.4$  Hz), 132.5, 130.8 ( $q, {}^4J_{\text{C-F}} = 1.6$  Hz) 129.6, 128.4, 122.2 ( $q, {}^1J_{\text{C-F}} = 270.8$  Hz), 121.5, 120.0 ( $q, {}^2J_{\text{C-F}} = 35.7$  Hz), 114.0, 55.4, 40.6, 28.7 ppm.

<sup>19</sup>F NMR (282 MHz,  $\text{CDCl}_3$ )  $\delta$  -57.02 ppm.

HRMS (ESI) calcd for  $[\text{C}_{21}\text{H}_{22}\text{F}_3\text{NO}_2\text{S} + \text{H}]^+$  410.1396, found 410.1396.

HPLC: Daicel Chiralpak OD-H, *n*-hexane/isopropanol 90/10, flow rate = 0.5 mL/min, uv-vis  $\lambda = 280$  nm,  $t_{R1} = 9.5$  min (major),  $t_{R2} = 11.1$  min (minor).

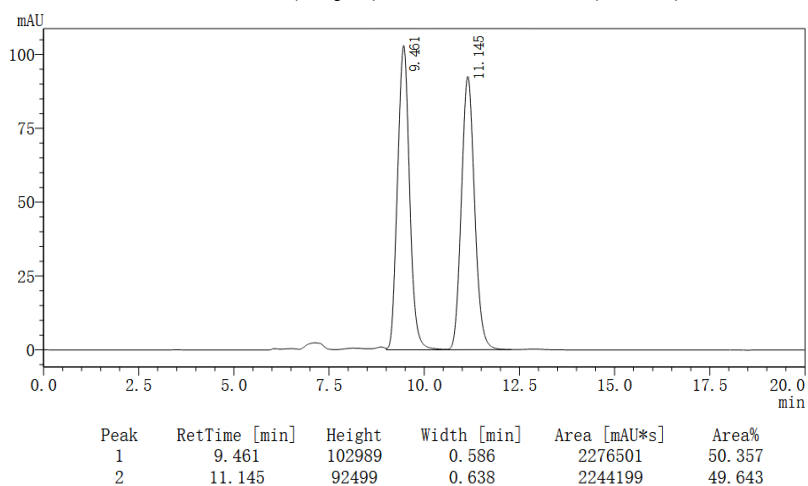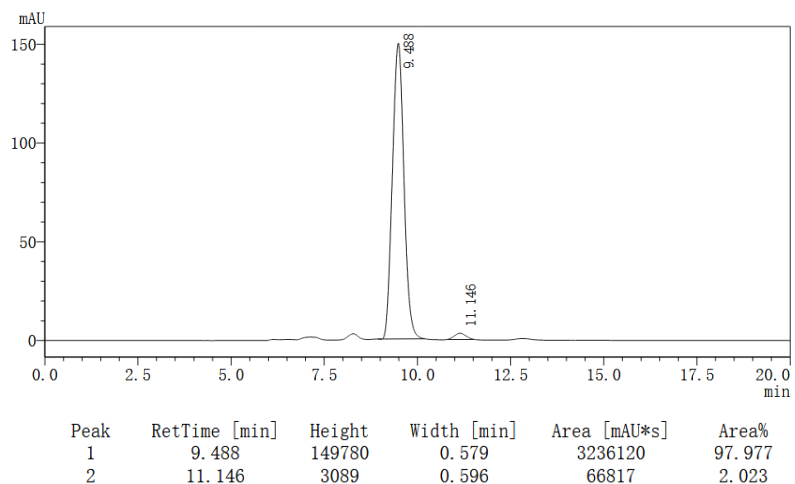

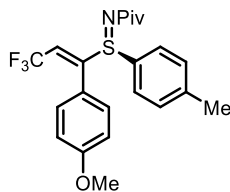

***N-((S)-p-tolyl((E)-3,3,3-trifluoro-1-(4-methoxyphenyl)prop-1-en-1-yl)-λ<sup>4</sup>-sulfaneylidene)pivalamide (4b)***

33.5 mg, 79% yield, 95% ee, *E/Z* > 20/1, colorless oil.

$[\alpha]_{25}^D = +85.7$  ( $c = 0.07$ ,  $\text{CHCl}_3$ ).

<sup>1</sup>H NMR (300 MHz,  $\text{CDCl}_3$ )  $\delta$  7.35 – 7.31 (m, 2H), 7.17 – 7.14 (m, 2H), 7.00 – 6.98 (m, 2H), 6.81 – 6.79 (m, 2H), 6.71 (q,  $J = 7.6$  Hz, 1H), 3.80 (s, 3H), 2.35 (s, 3H), 1.30 (s, 9H) ppm.

<sup>13</sup>C NMR (75 MHz,  $\text{CDCl}_3$ )  $\delta$  190.5, 161.2, 150.2 (q,  $^3J_{\text{C-F}} = 5.4$  Hz), 143.3, 130.7 (q,  $^4J_{\text{C-F}} = 1.4$  Hz), 130.3, 129.0, 128.4, 122.3 (q,  $^1J_{\text{C-F}} = 271.0$  Hz), 121.6, 119.7 (q,  $^2J_{\text{C-F}} = 35.6$  Hz), 114.0, 55.4, 40.6, 28.7, 21.6 ppm.

<sup>19</sup>F NMR (282 MHz,  $\text{CDCl}_3$ )  $\delta$  -56.97 ppm.

HRMS (ESI) calcd for  $[\text{C}_{21}\text{H}_{24}\text{F}_3\text{NO}_2\text{S}+\text{H}]^+$  424.1553, found 424.1550.

HPLC: Daicel Chiralpak OD-H, n-hexane/isopropanol 95/5, flow rate = 0.5 mL/min, uv-vis  $\lambda = 280$  nm,  $t_{\text{R}1} = 11.8$  min (major),  $t_{\text{R}2} = 13.5$  min (minor).

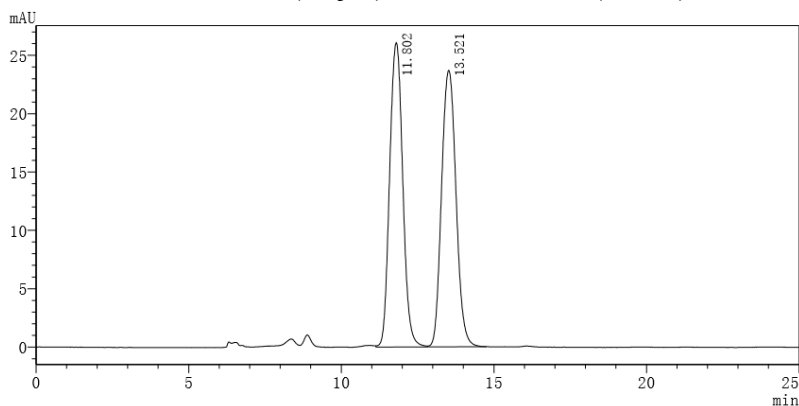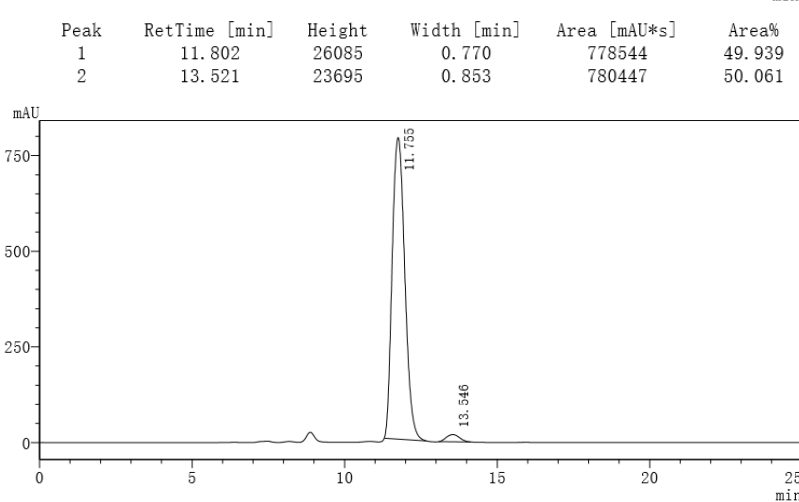

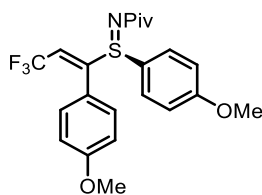

***N-((S)-(4-methoxyphenyl))((E)-3,3,3-trifluoro-1-(4-methoxyphenyl)prop-1-en-1-yl)- $\lambda^4$ -sulfaneylidene)pivalamide (4c)***

31.4 mg, 72% yield, 96% ee,  $E/Z > 20/1$ , colorless oil.

$[\alpha]_{25}^D = +89.5$  ( $c = 0.084$ ,  $\text{CHCl}_3$ ).

$^1\text{H NMR}$  (300 MHz,  $\text{CDCl}_3$ )  $\delta$  7.40 – 7.36 (m, 2H), 7.00 – 6.96 (m, 2H), 6.88 – 6.84 (m, 2H), 6.82 – 6.79 (m, 2H), 6.70 (q,  $J = 7.6$  Hz, 1H), 4.10 – 3.51 (m, 6H), 1.29 (s, 9H) ppm.

$^{13}\text{C NMR}$  (75 MHz,  $\text{CDCl}_3$ )  $\delta$  190.4, 162.9, 161.1, 150.3 (q,  $^3J_{\text{C-F}} = 5.2$  Hz), 130.8 (q,  $^4J_{\text{C-F}} = 1.4$  Hz), 130.5, 122.7, 122.3 (q,  $^1J_{\text{C-F}} = 271.0$  Hz), 121.7, 119.6 (q,  $^2J_{\text{C-F}} = 35.6$  Hz), 115.1, 114.0, 55.7, 55.3, 40.6, 28.7 ppm.

$^{19}\text{F NMR}$  (282 MHz,  $\text{CDCl}_3$ )  $\delta$  -56.95 ppm.

**HRMS** (ESI) calcd for  $[\text{C}_{21}\text{H}_{24}\text{F}_3\text{NO}_3\text{S}+\text{H}]^+$  440.1502, found 440.1507.

**HPLC**: Daicel Chiralpak IA-3, n-hexane/isopropanol 70/30, flow rate = 0.5 mL/min, uv-vis  $\lambda = 280$  nm,  $t_{\text{R}1} = 9.2$  min (major),  $t_{\text{R}2} = 28.2$  min (minor).

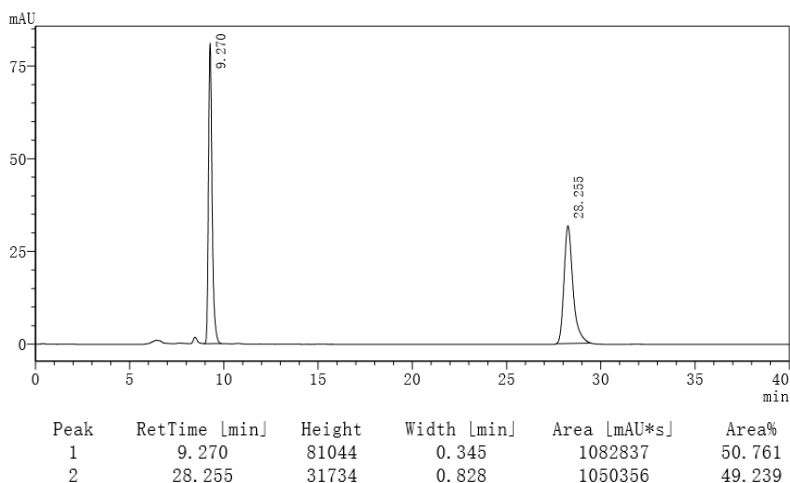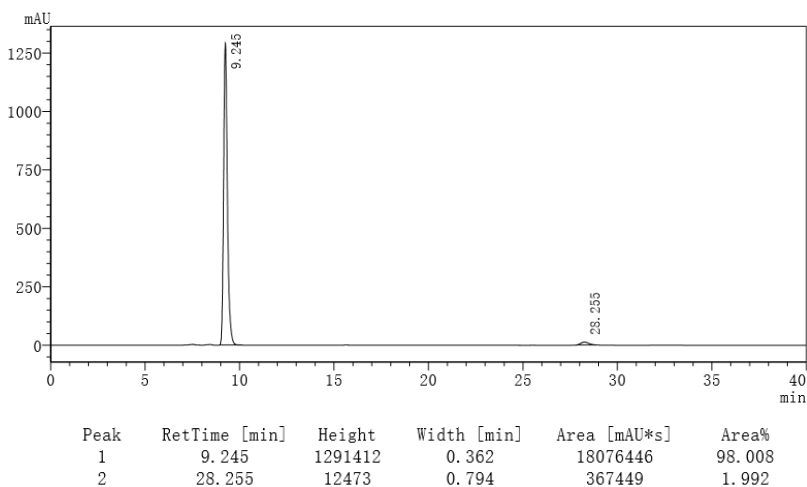

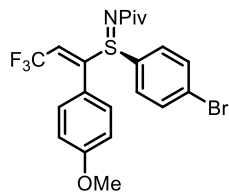

***N-((S)-(4-bromophenyl))((E)-3,3,3-trifluoro-1-(4-methoxyphenyl)prop-1-en-1-yl)- $\lambda^4$ -sulfaneylidene)pivalamide (4d)***

41.9 mg, 86% yield, 97% ee, *E/Z* > 20/1, colorless oil.

$[\alpha]_{25}^D = +97.9$  ( $c = 0.098$ ,  $\text{CHCl}_3$ ).

$^1\text{H NMR}$  (300 MHz,  $\text{CDCl}_3$ )  $\delta$  7.52 – 7.48 (m, 2H), 7.32 – 7.28 (m, 2H), 7.03 – 6.99 (m, 2H), 6.86 – 6.81 (m, 2H), 6.73 (q,  $J = 7.5$  Hz, 1H), 3.82 (s, 3H), 1.30 (s, 9H) ppm.

$^{13}\text{C NMR}$  (75 MHz,  $\text{CDCl}_3$ )  $\delta$  190.6, 161.4, 149.7 (q,  $^3J_{\text{C-F}} = 5.3$  Hz), 132.9, 131.8, 130.8 (q,  $^4J_{\text{C-F}} = 1.5$  Hz), 129.7, 127.4, 122.1 (q,  $^1J_{\text{C-F}} = 270.8$  Hz), 121.2, 120.3 (q,  $^2J_{\text{C-F}} = 35.9$  Hz), 114.2, 55.5, 40.7, 28.6 ppm.

$^{19}\text{F NMR}$  (282 MHz,  $\text{CDCl}_3$ )  $\delta$  -57.05 ppm.

**HRMS** (ESI) calcd for  $[\text{C}_{21}\text{H}_{21}\text{BrF}_3\text{NO}_2\text{S}+\text{H}]^+$  488.0502, found 488.0504.

**HPLC**: Daicel Chiralpak IA-3, *n*-hexane/isopropanol 70/30, flow rate = 0.5 mL/min, uv-vis  $\lambda = 280$  nm,  $t_{\text{R}1} = 9.1$  min (major),  $t_{\text{R}2} = 27.2$  min (minor).

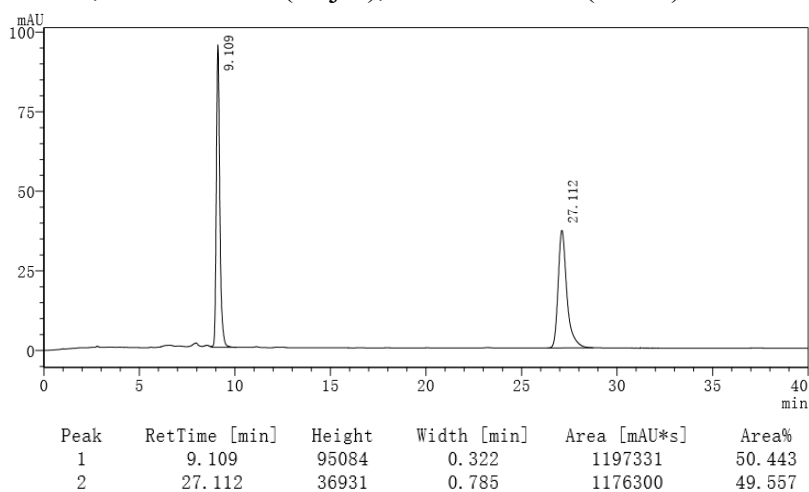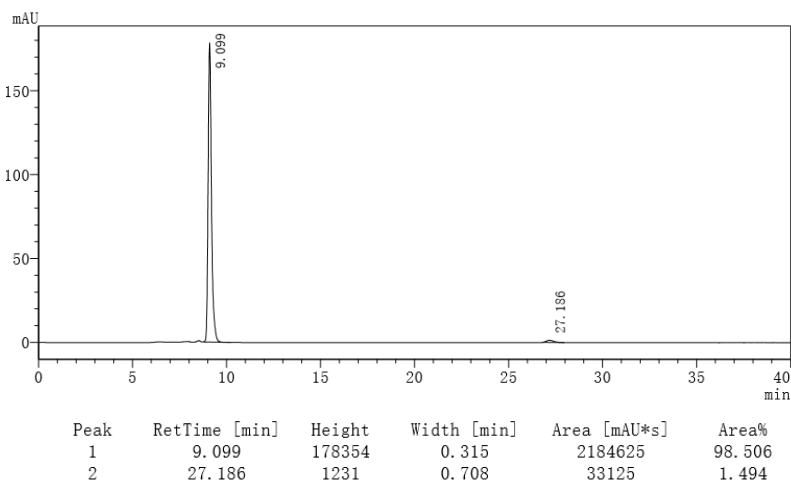

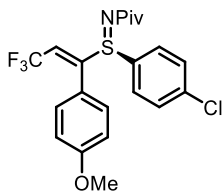

***N-((S)-(4-chlorophenyl)((E)-3,3,3-trifluoro-1-(4-methoxyphenyl)prop-1-en-1-yl)-λ<sup>4</sup>-sulfaneylidene)pivalamide (4e)***

35.1 mg, 79% yield, 97% ee, *E/Z* > 20/1, colorless oil.

$[\alpha]_{25}^D = +82.2$  ( $c = 0.062$ ,  $\text{CHCl}_3$ ).

<sup>1</sup>H NMR (300 MHz,  $\text{CDCl}_3$ )  $\delta$  7.40 – 7.32 (m, 4H), 7.03 – 6.98 (m, 2H), 6.86 – 6.81 (m, 2H), 6.73 (q,  $J = 7.5$  Hz, 1H), 3.81 (s, 3H), 1.30 (s, 9H) ppm.

<sup>13</sup>C NMR (75 MHz,  $\text{CDCl}_3$ )  $\delta$  190.6, 161.4, 149.8 (q,  $^3J_{\text{C-F}} = 5.3$  Hz), 139.0, 131.1, 130.8 (q,  $^4J_{\text{C-F}} = 1.7$  Hz), 129.9, 129.6, 122.1 (q,  $^1J_{\text{C-F}} = 270.8$  Hz), 121.2, 120.3 (q,  $^2J_{\text{C-F}} = 35.8$  Hz), 114.2, 55.4, 40.6, 28.6 ppm.

<sup>19</sup>F NMR (282 MHz,  $\text{CDCl}_3$ )  $\delta$  -57.05 ppm.

HRMS (ESI) calcd for  $[\text{C}_{21}\text{H}_{21}\text{ClF}_3\text{NO}_2\text{S}+\text{H}]^+$  444.1007, found 444.1014.

HPLC: Daicel Chiralpak IA-3, *n*-hexane/isopropanol 70/30, flow rate = 0.5 mL/min, uv-vis  $\lambda = 280$  nm,  $t_{\text{R}1} = 8.9$  min (major),  $t_{\text{R}2} = 23.3$  min (minor).

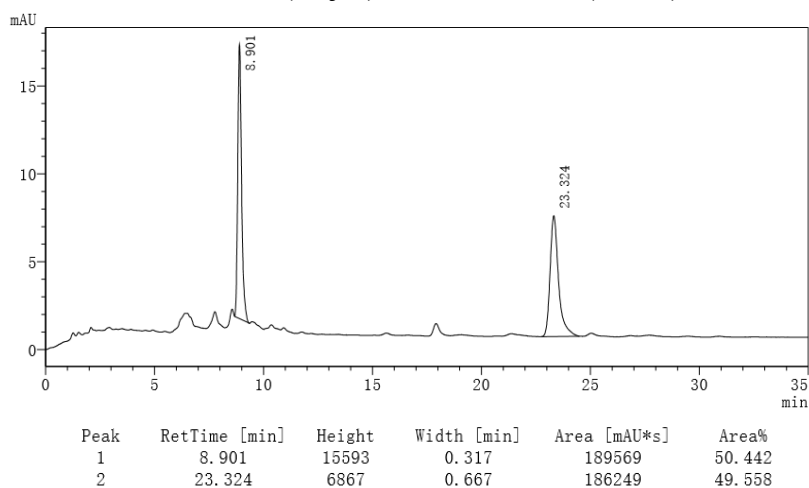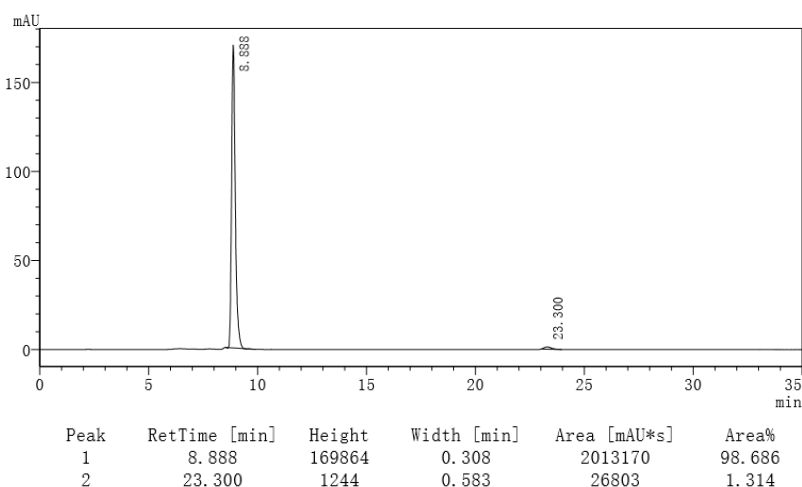

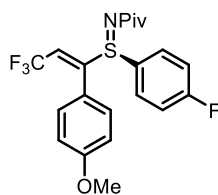

***N-((S)-(4-fluorophenyl))((E)-3,3,3-trifluoro-1-(4-methoxyphenyl)prop-1-en-1-yl)-λ<sup>4</sup>-sulfaneylidene)pivalamide (4f)***

31.2 mg, 73% yield, 96% ee, *E/Z* > 20/1, colorless oil.

$[\alpha]_{25}^D = +120.7$  ( $c = 0.082$ ,  $\text{CHCl}_3$ ).

<sup>1</sup>H NMR (300 MHz,  $\text{CDCl}_3$ )  $\delta$  7.47 – 7.42 (m, 2H), 7.09 – 7.03 (m, 2H), 7.00 – 6.97 (m, 2H), 6.84 – 6.69 (m, 2H), 6.73 (q,  $J = 7.5$  Hz, 1H), 3.81 (s, 3H), 1.30 (s, 9H) ppm.

<sup>13</sup>C NMR (75 MHz,  $\text{CDCl}_3$ )  $\delta$  190.6, 165.1 (d,  $^1J_{\text{C-F}} = 253.1$  Hz), 161.4, 150.0 (q,  $^3J_{\text{C-F}} = 5.3$  Hz), 130.78 (q,  $^4J_{\text{C-F}} = 1.4$  Hz), 130.76 (d,  $^3J_{\text{C-F}} = 9.1$  Hz), 128.0 (d,  $^4J_{\text{C-F}} = 2.9$  Hz), 122.2 (q,  $^1J_{\text{C-F}} = 270.8$  Hz), 121.3, 120.2 (q,  $^2J_{\text{C-F}} = 35.8$  Hz), 117.1 (d,  $^2J_{\text{C-F}} = 22.5$  Hz), 114.2, 55.4, 40.6, 28.6 ppm.

<sup>19</sup>F NMR (282 MHz,  $\text{CDCl}_3$ )  $\delta$  -57.05 (3F), -105.38 (1F) ppm.

HRMS (ESI) calcd for  $[\text{C}_{21}\text{H}_{21}\text{F}_4\text{NO}_2\text{S}+\text{H}]^+$  428.1302, found 428.1304.

HPLC: Daicel Chiralpak IA-3, *n*-hexane/isopropanol 70/30, flow rate = 0.5 mL/min, uv-vis  $\lambda = 280$  nm,  $t_{R1} = 8.7$  min (major),  $t_{R2} = 16.1$  min (minor).

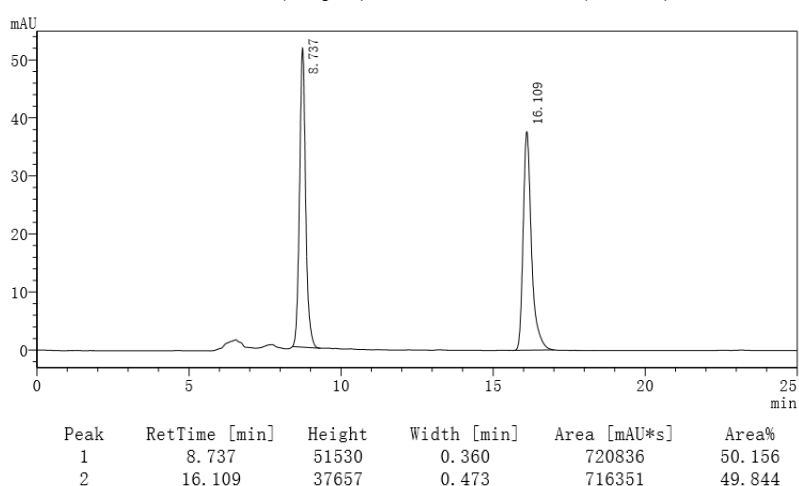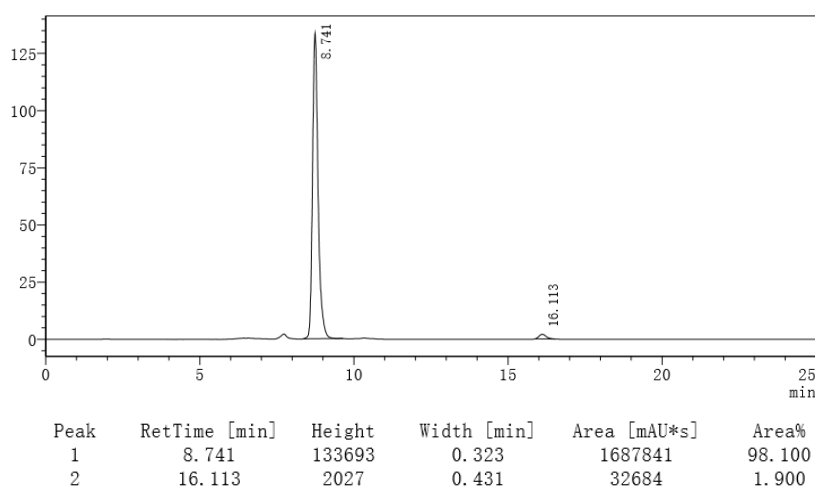

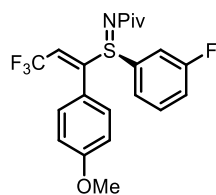

***N-((S)-(3-fluorophenyl))((E)-3,3,3-trifluoro-1-(4-methoxyphenyl)prop-1-en-1-yl)-λ<sup>4</sup>-sulfaneylidene)pivalamide (4g)***

32.1 mg, 75% yield, 94% ee, *E/Z* > 20/1, colorless oil.

$[\alpha]_{25}^D = +29.0$  ( $c = 0.062$ ,  $\text{CHCl}_3$ ).

<sup>1</sup>H NMR (300 MHz,  $\text{CDCl}_3$ )  $\delta$  7.36 – 7.25 (m, 2H), 7.20 – 7.10 (m, 2H), 7.04 – 6.99 (m, 2H), 6.86 – 6.81 (m, 2H), 6.74 (q,  $J = 7.5$  Hz, 1H) 3.81 (s, 3H), 1.31 (s, 9H) ppm.

<sup>13</sup>C NMR (75 MHz,  $\text{CDCl}_3$ )  $\delta$  190.7, 162.8 (d,  $^1J_{\text{C-F}} = 251.0$  Hz), 149.8 (q,  $^3J_{\text{C-F}} = 5.3$  Hz), 134.8 (d,  $^3J_{\text{C-F}} = 7.0$  Hz), 131.0 (d,  $^3J_{\text{C-F}} = 7.8$  Hz), 130.8 (q,  $^4J_{\text{C-F}} = 1.4$  Hz), 124.2 (d,  $^4J_{\text{C-F}} = 3.4$  Hz), 122.1 (q,  $^1J_{\text{C-F}} = 270.9$  Hz), 121.2, 120.5 (q,  $^2J_{\text{C-F}} = 35.9$  Hz), 119.8 (d,  $^2J_{\text{C-F}} = 21.2$  Hz), 115.1 (d,  $^2J_{\text{C-F}} = 24.6$  Hz), 114.2, 55.5, 40.7, 28.6 ppm.

<sup>19</sup>F NMR (282 MHz,  $\text{CDCl}_3$ )  $\delta$  -57.09 (3F), -108.57 (1F) ppm.

HRMS (ESI) calcd for  $[\text{C}_{21}\text{H}_{21}\text{F}_4\text{NO}_2\text{S}+\text{H}]^+$  428.1302, found 428.1309.

HPLC: Daicel Chiralpak IA-3, *n*-hexane/isopropanol 90/10, flow rate = 0.5 mL/min, uv-vis  $\lambda = 280$  nm,  $t_{\text{R}1} = 13.2$  min (major),  $t_{\text{R}2} = 17.6$  min (minor).

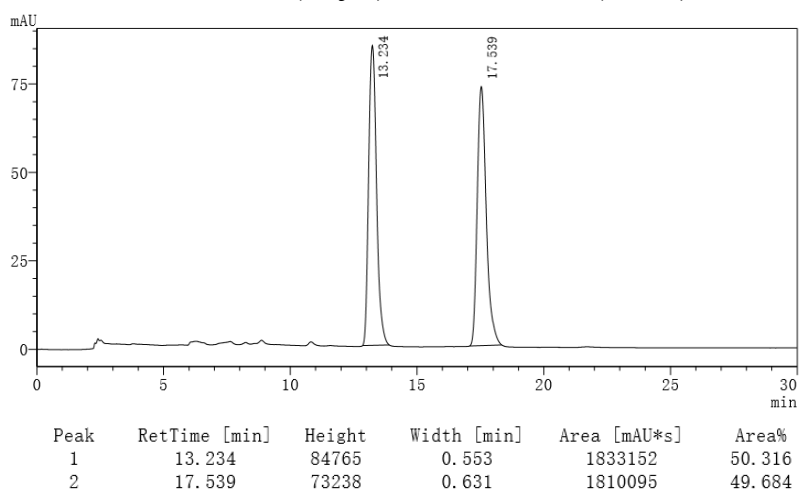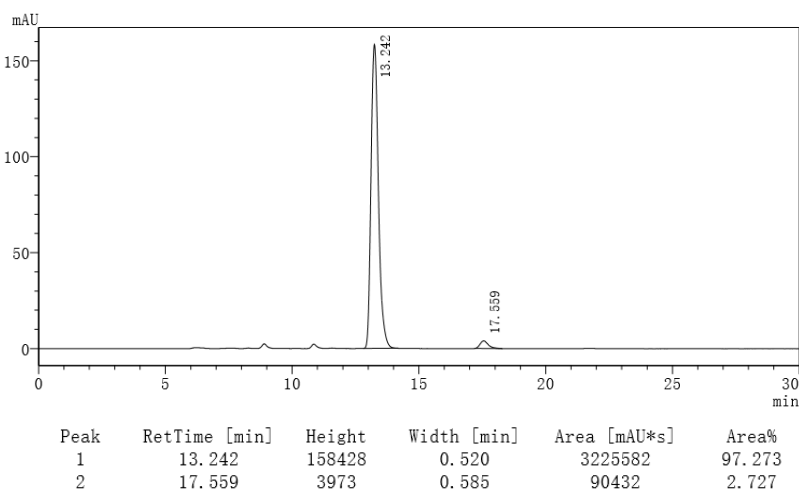

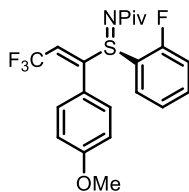

***N-((S)-(2-fluorophenyl))((E)-3,3,3-trifluoro-1-(4-methoxyphenyl)prop-1-en-1-yl)-λ<sup>4</sup>-sulfaneylidene)pivalamide (4h)***

35.0 mg, 82% yield, 96% ee, *E/Z* > 20/1, colorless oil.

$[\alpha]_{25}^D = +112.5$  ( $c = 0.064$ ,  $\text{CHCl}_3$ ).

<sup>1</sup>H NMR (300 MHz,  $\text{CDCl}_3$ )  $\delta$  7.71 – 7.68 (m, 1H), 7.50 – 7.42 (m, 1H), 7.28 – 7.23 (m, 1H), 7.04 – 6.94 (m, 3H), 6.83 – 6.75 (m, 3H), 3.79 (s, 3H), 1.28 (s, 9H) ppm.

<sup>13</sup>C NMR (75 MHz,  $\text{CDCl}_3$ )  $\delta$  190.6, 160.7 (d,  $^1J_{\text{C-F}} = 252.7$  Hz), 161.3, 149.3 (q,  $^3J_{\text{C-F}} = 4.6$  Hz), 134.5 (d,  $^3J_{\text{C-F}} = 8.1$  Hz), 130.7 (q,  $^4J_{\text{C-F}} = 1.2$  Hz), 129.4, 125.7 (d,  $^4J_{\text{C-F}} = 3.5$  Hz), 122.1 (q,  $^2J_{\text{C-F}} = 36.0$  Hz), 122.0 (q,  $^1J_{\text{C-F}} = 270.9$  Hz), 120.4 (d,  $^3J_{\text{C-F}} = 10.2$  Hz), 120.3 (d,  $^2J_{\text{C-F}} = 24.9$  Hz), 116.5 (d,  $^2J_{\text{C-F}} = 20.4$  Hz), 113.7, 55.4, 40.6, 28.6 ppm.

<sup>19</sup>F NMR (282 MHz,  $\text{CDCl}_3$ )  $\delta$  -57.23 (3F), -109.96 (1F) ppm.

HRMS (ESI) calcd for  $[\text{C}_{21}\text{H}_{21}\text{F}_4\text{NO}_2\text{S}+\text{H}]^+$  428.1302, found 428.1305.

HPLC: Daicel Chiralpak IA-3, *n*-hexane/isopropanol 90/10, flow rate = 0.5 mL/min, uv-vis  $\lambda = 280$  nm,  $t_{\text{R}1} = 13.2$  min (major),  $t_{\text{R}2} = 19.5$  min (minor).

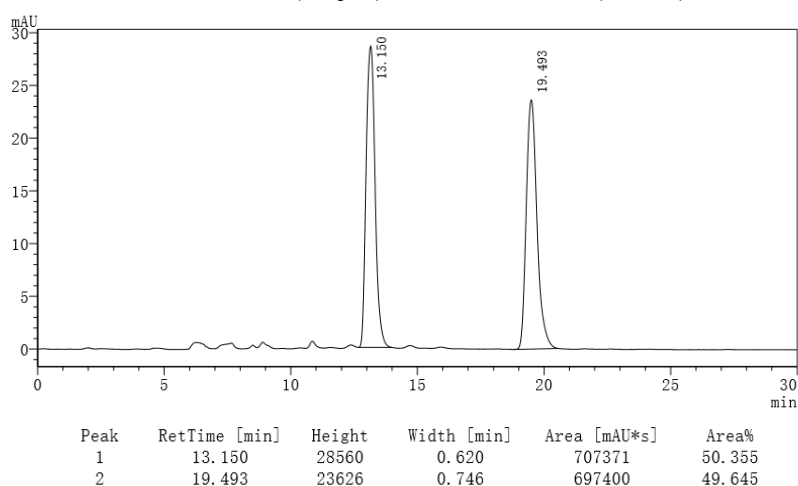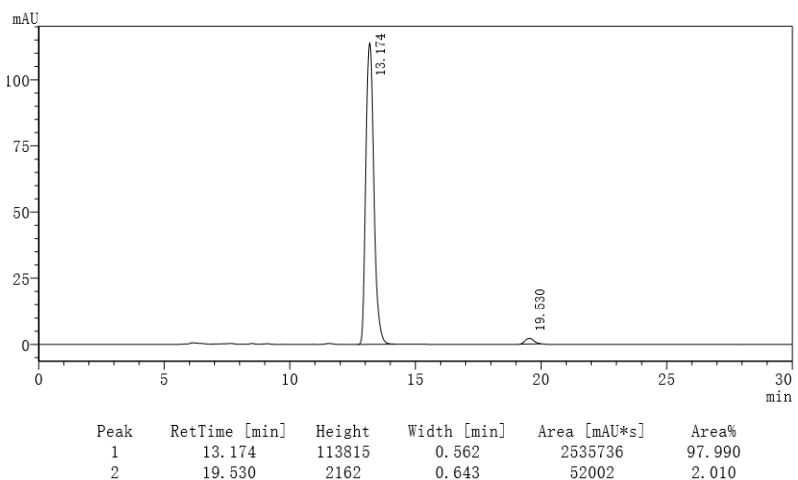

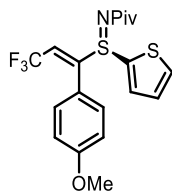

***N-((S)-thiophen-2-yl)((E)-3,3,3-trifluoro-1-(4-methoxyphenyl)prop-1-en-1-yl)-λ<sup>4</sup>-sulfaneylidene)pivalamide (4i)***

34.0 mg, 82% yield, 96% ee, *E/Z* > 20/1, colorless oil.

$[\alpha]_{25}^D = +44.3$  ( $c = 0.07$ ,  $\text{CHCl}_3$ ).

<sup>1</sup>H NMR (300 MHz,  $\text{CDCl}_3$ )  $\delta$  7.64 – 7.61 (m, 1H), 7.11 – 7.02 (m, 3H), 6.94 – 6.84 (m, 1H), 6.86 – 6.84 (m, 2H), 6.60 (q,  $J = 7.4$  Hz, 1H), 3.82 (s, 3H), 1.30 (s, 9H) ppm.

<sup>13</sup>C NMR (75 MHz,  $\text{CDCl}_3$ )  $\delta$  190.7, 161.4, 151.0 (q,  $^3J_{\text{C-F}} = 5.3$  Hz), 133.8, 133.4, 132.1, 130.8 (q,  $^4J_{\text{C-F}} = 1.6$  Hz), 127.5, 122.2 (q,  $^1J_{\text{C-F}} = 270.8$  Hz), 121.1, 119.0 (q,  $^2J_{\text{C-F}} = 35.9$  Hz), 114.1, 55.4, 40.6, 28.6 ppm.

<sup>19</sup>F NMR (282 MHz,  $\text{CDCl}_3$ )  $\delta$  -57.19 ppm.

HRMS (ESI) calcd for  $[\text{C}_{19}\text{H}_{20}\text{F}_3\text{NO}_2\text{S}_2+\text{H}]^+$  416.0960, found 416.0958.

HPLC: Daicel Chiralpak OD-H, *n*-hexane/isopropanol 90/10, flow rate = 0.5 mL/min, uv-vis  $\lambda = 280$  nm,  $t_{\text{R}1} = 11.3$  min (major),  $t_{\text{R}2} = 13.3$  min (minor).

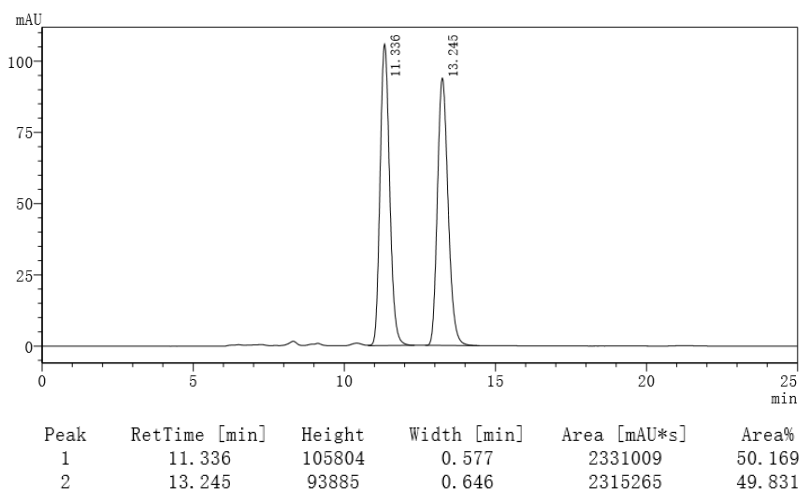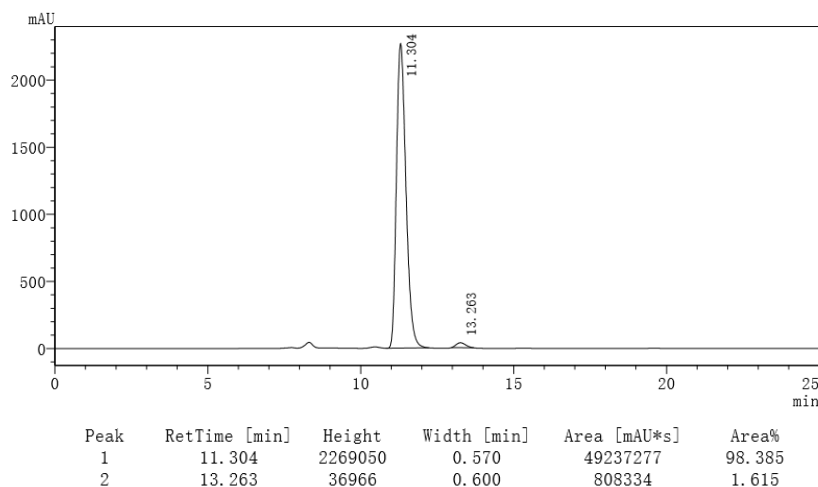

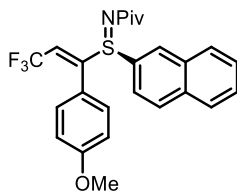

***N-((S)-naphthalen-2-yl)((E)-3,3,3-trifluoro-1-(4-methoxyphenyl)prop-1-en-1-yl)-λ<sup>4</sup>-sulfaneylidene)pivalamide (4j)***

30.8 mg, 67% yield, 96% ee, *E/Z* > 20/1, colorless oil.

$[\alpha]_{25}^D = +100.0$  ( $c = 0.098$ ,  $\text{CHCl}_3$ ).

<sup>1</sup>H NMR (300 MHz,  $\text{CDCl}_3$ )  $\delta$  7.91 – 7.82 (m, 3H), 7.77 – 7.74 (m, 1H), 7.62 – 7.50 (m, 3H), 7.02 – 6.97 (m, 2H), 6.85 – 6.73 (m, 3H), 3.75 (s, 3H), 1.32 (s, 9H) ppm.

<sup>13</sup>C NMR (75 MHz,  $\text{CDCl}_3$ )  $\delta$  190.6, 161.2, 149.9 (q, <sup>3</sup> $J_{\text{C-F}} = 5.2$  Hz), 134.9, 132.6, 130.8 (q, <sup>4</sup> $J_{\text{C-F}} = 1.4$  Hz), 130.5, 130.1, 129.1, 128.8, 128.1, 127.6, 122.8, 122.3 (q, <sup>1</sup> $J_{\text{C-F}} = 269.8$  Hz) 121.5, 120.2 (q, <sup>2</sup> $J_{\text{C-F}} = 35.5$  Hz), 114.0, 55.4, 40.7, 28.7 ppm.

<sup>19</sup>F NMR (282 MHz,  $\text{CDCl}_3$ )  $\delta$  -56.94 ppm.

HRMS (ESI) calcd for  $[\text{C}_{25}\text{H}_{24}\text{F}_3\text{NO}_2\text{S}+\text{H}]^+$  460.1553, found 460.1556.

HPLC: Daicel Chiralpak IA-3, *n*-hexane/isopropanol 70/30, flow rate = 0.5 mL/min, uv-vis  $\lambda = 280$  nm,  $t_{\text{R}1} = 9.3$  min (major),  $t_{\text{R}2} = 19.3$  min (minor).

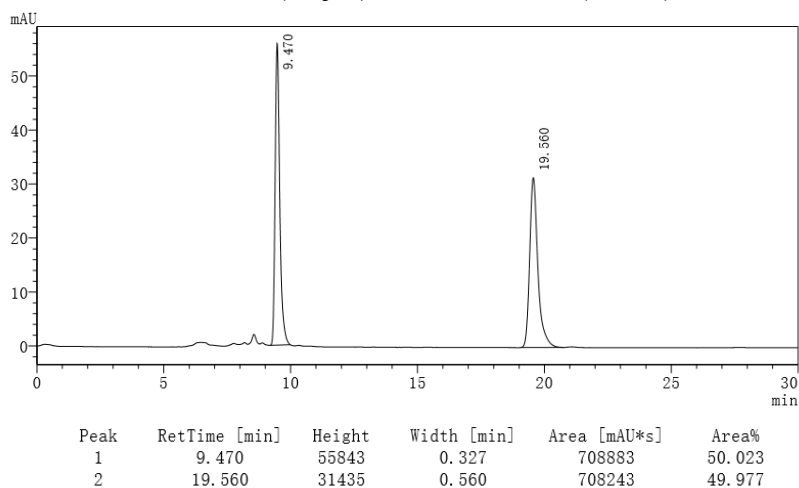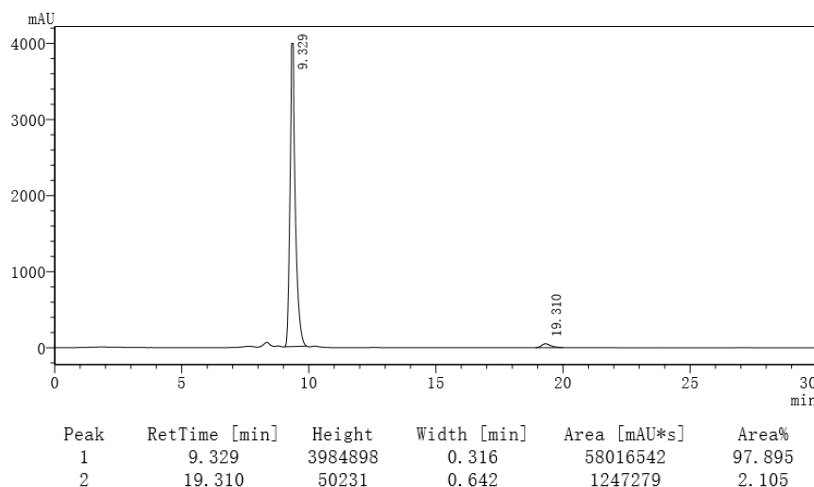

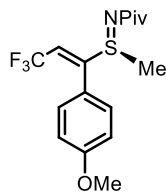

***N-((S)-methyl((E)-3,3,3-trifluoro-1-(4-methoxyphenyl)prop-1-en-1-yl)-λ<sup>4</sup>-sulfaneylidene)pivalamide (4k)***

26.4 mg, 76% yield, 95% ee, *E/Z* > 20/1, colorless oil.

$[\alpha]_{25}^D = +121.0$  ( $c = 0.076$ ,  $\text{CHCl}_3$ ).

<sup>1</sup>H NMR (300 MHz,  $\text{CDCl}_3$ )  $\delta$  7.37 – 7.32 (m, 2H), 7.00 – 6.95 (m, 2H), 6.44 (q,  $J = 7.6$  Hz, 1H), 3.85 (s, 3H), 2.48 (s, 3H), 1.27 (s, 9H) ppm.

<sup>13</sup>C NMR (75 MHz,  $\text{CDCl}_3$ )  $\delta$  191.1, 161.7, 149.2 (q,  $^3J_{\text{C-F}} = 5.4$  Hz), 130.4 (q,  $^4J_{\text{C-F}} = 1.7$  Hz), 122.1 (q,  $^1J_{\text{C-F}} = 270.8$  Hz), 121.4, 120.1 (q,  $^2J_{\text{C-F}} = 35.8$  Hz), 114.7, 55.5, 40.3, 30.6, 28.6 ppm.

<sup>19</sup>F NMR (282 MHz,  $\text{CDCl}_3$ )  $\delta$  -57.07 ppm.

HRMS (ESI) calcd for  $[\text{C}_{16}\text{H}_{20}\text{F}_3\text{NO}_2\text{S} + \text{H}]^+$  348.1240, found 348.1243

HPLC: Daicel Chiralpak IA-3, *n*-hexane/isopropanol 90/10, flow rate = 0.5 mL/min, uv-vis  $\lambda = 254$  nm,  $t_{\text{R}1} = 12.3$  min (minor),  $t_{\text{R}2} = 16.2$  min (major).

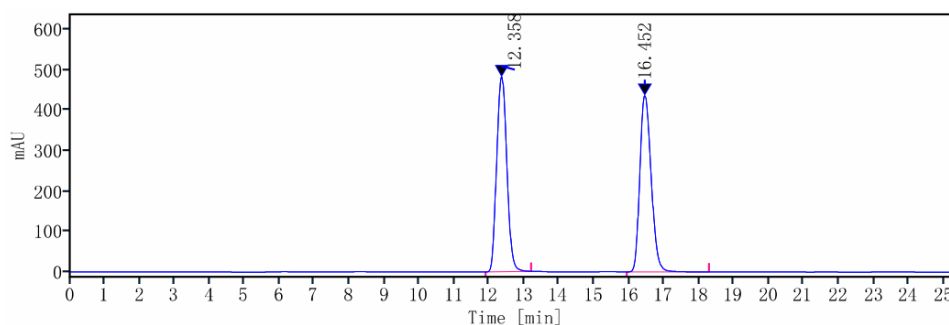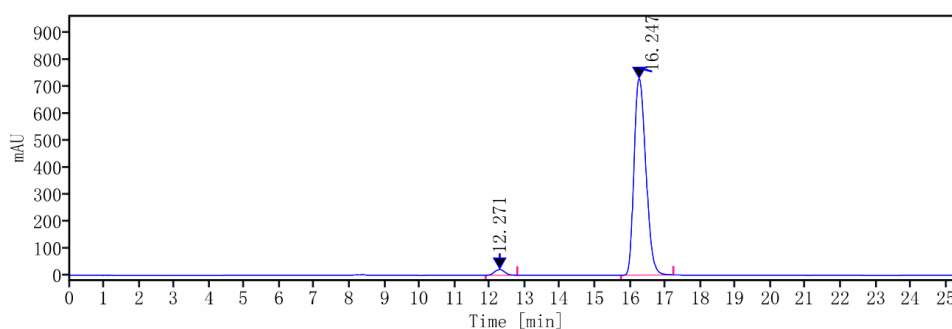

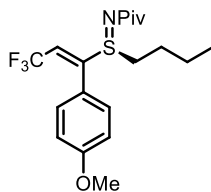

***N-((S)-butyl((E)-3,3,3-trifluoro-1-(4-methoxyphenyl)prop-1-en-1-yl)- $\lambda^4$ -sulfaneylidene)pivalamide (4l)***

35.2 mg, 87% yield, 99% ee, *E/Z* > 20/1, colorless oil.

$[\alpha]_{25}^D = +54.7$  ( $c = 0.064$ ,  $\text{CHCl}_3$ ).

$^1\text{H NMR}$  (300 MHz,  $\text{CDCl}_3$ )  $\delta$  7.38 – 7.33 (m, 2H), 7.00 – 6.95 (m, 2H), 6.39 (q,  $J = 7.7$  Hz, 1H), 3.85 (s, 3H), 2.81 – 2.71 (m, 1H), 2.67 – 2.58 (m, 1H), 1.72 – 1.47 (m, 2H), 1.41 – 1.25 (m, 11H), 0.85 (t,  $J = 7.3$  Hz, 3H) ppm.

$^{13}\text{C NMR}$  (75 MHz,  $\text{CDCl}_3$ )  $\delta$  191.3, 161.6, 147.7 (q,  $^3J_{\text{C-F}} = 5.3$  Hz), 130.3 (q,  $^4J_{\text{C-F}} = 1.8$  Hz), 122.2 (q,  $^1J_{\text{C-F}} = 270.5$  Hz), 121.7, 120.6 (q,  $^2J_{\text{C-F}} = 35.8$  Hz), 114.7, 55.5, 44.3, 40.6, 28.7, 24.7, 21.5, 13.6 ppm.

$^{19}\text{F NMR}$  (282 MHz,  $\text{CDCl}_3$ )  $\delta$  -56.89 ppm.

**HRMS** (ESI) calcd for  $[\text{C}_{19}\text{H}_{26}\text{F}_3\text{NO}_2\text{S}+\text{H}]^+$  390.1709, found 390.1705.

**HPLC**: Daicel Chiralpak OD-H, *n*-hexane/isopropanol 95/5, flow rate = 0.5 mL/min, uv-vis  $\lambda = 280$  nm,  $t_{\text{R}1} = 10.0$  min (minor),  $t_{\text{R}2} = 11.5$  min (major).

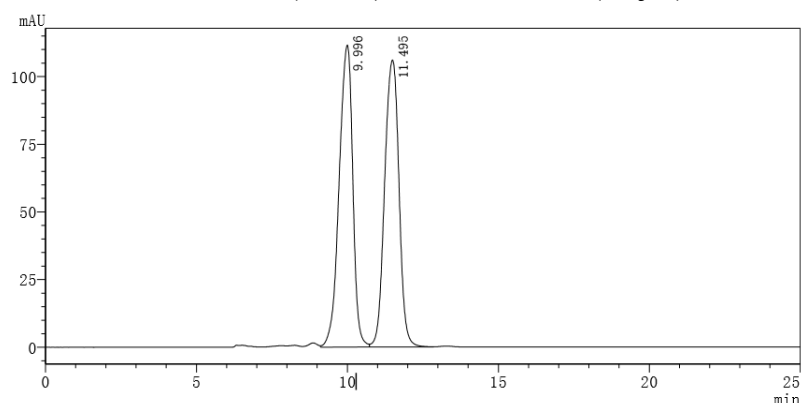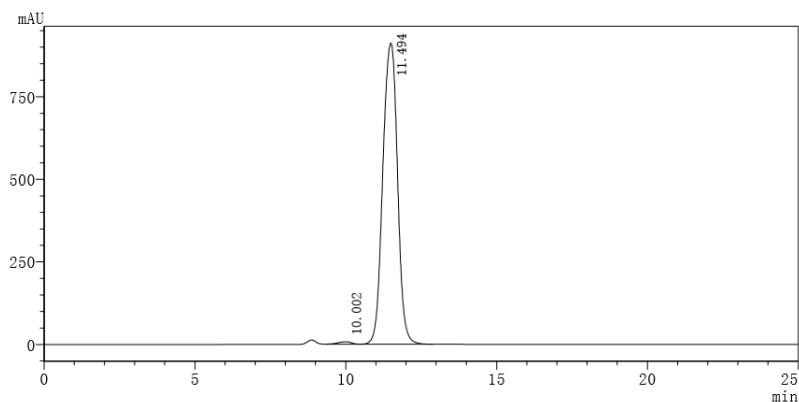

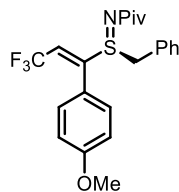

***N-((S)-benzyl((E)-3,3,3-trifluoro-1-(4-methoxyphenyl)prop-1-en-1-yl)-λ<sup>4</sup>-sulfaneylidene)pivalamide (4m)***

36.8 mg, 87% yield, 96% ee, *E/Z* > 20/1, colorless oil.

$[\alpha]_{25}^D = +137.8$  ( $c = 0.074$ ,  $\text{CHCl}_3$ ).

<sup>1</sup>H NMR (300 MHz,  $\text{CDCl}_3$ )  $\delta$  7.45 – 7.40 (m, 2H), 7.34 – 7.28 (m, 3H), 7.15 – 7.12 (m, 2H), 7.02 – 6.97 (m, 2H), 6.18 (q,  $J = 7.9$  Hz, 1H), 4.18 (d,  $J = 12.8$  Hz, 1H), 3.87 (s, 3H), 3.81 (d,  $J = 12.8$  Hz, 1H), 1.23 (s, 9H) ppm.

<sup>13</sup>C NMR (75 MHz,  $\text{CDCl}_3$ )  $\delta$  190.8, 161.8, 146.1 (q,  $^3J_{\text{C-F}} = 5.5$  Hz), 131.1, 130.7 (q,  $^4J_{\text{C-F}} = 1.9$  Hz), 129.2, 128.4, 128.1, 121.9, 121.7 (q,  $^2J_{\text{C-F}} = 35.5$  Hz), 122.1 (q,  $^1J_{\text{C-F}} = 270.5$  Hz), 114.7, 55.6, 50.0, 40.5, 28.6 ppm.

<sup>19</sup>F NMR (282 MHz,  $\text{CDCl}_3$ )  $\delta$  -57.06 ppm.

HRMS (ESI) calcd for  $[\text{C}_{22}\text{H}_{24}\text{F}_3\text{NO}_2\text{S}+\text{H}]^+$  424.1553, found 424.1558.

HPLC: Daicel Chiralpak OD-H, *n*-hexane/isopropanol 95/5, flow rate = 0.5 mL/min, uv-vis  $\lambda = 280$  nm,  $t_{\text{R}1} = 24.2$  min (minor),  $t_{\text{R}2} = 30.1$  min (major).

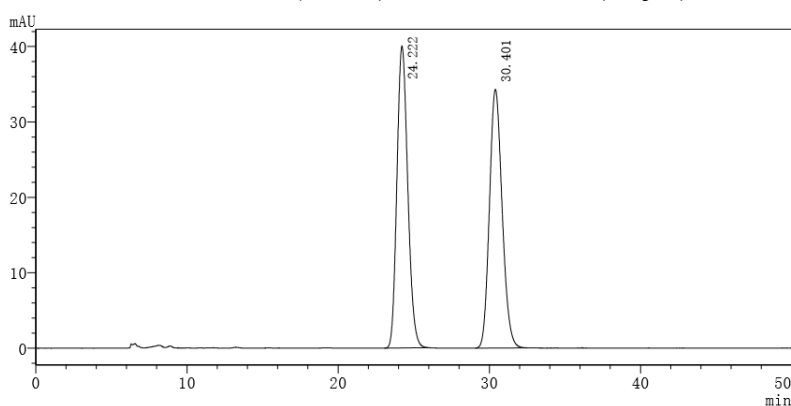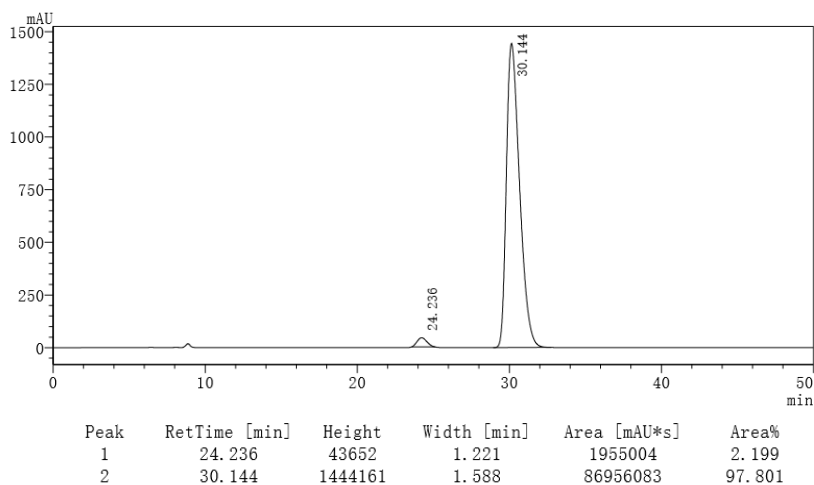

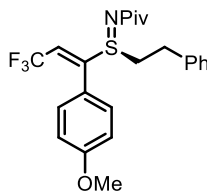

***N*-((*S*)-phenethyl((*E*)-3,3,3-trifluoro-1-(4-methoxyphenyl)prop-1-en-1-yl)- $\lambda^4$ -sulfaneylidene)pivalamide (**4n**)**

37.5 mg, 86% yield, 99% ee, *E/Z* > 20/1, colorless oil.

$[\alpha]_{25}^D = +28.1$  ( $c = 0.11$ ,  $\text{CHCl}_3$ ).

$^1\text{H NMR}$  (300 MHz,  $\text{CDCl}_3$ )  $\delta$  7.34 – 7.18 (m, 5H), 7.07 – 7.04 (m, 2H), 6.97 – 6.94 (m, 2H), 6.44 (q,  $J = 7.7$  Hz, 1H), 3.84 (s, 3H), 3.09 – 2.80 (m, 4H), 1.32 (s, 9H) ppm.

$^{13}\text{C NMR}$  (75 MHz,  $\text{CDCl}_3$ )  $\delta$  191.2, 161.7, 147.2 (q,  $^3J_{\text{C-F}} = 5.3$  Hz), 137.7, 130.2 (q,  $^4J_{\text{C-F}} = 1.9$  Hz), 128.9, 128.7, 127.2, 122.2 (q,  $^1J_{\text{C-F}} = 270.6$  Hz), 121.5, 121.0 (q,  $^2J_{\text{C-F}} = 35.9$  Hz), 114.7, 55.5, 45.3, 40.6, 28.8, 28.7 ppm.

$^{19}\text{F NMR}$  (282 MHz,  $\text{CDCl}_3$ )  $\delta$  -56.82 ppm.

**HRMS** (ESI) calcd for  $[\text{C}_{23}\text{H}_{26}\text{F}_3\text{NO}_2\text{S} + \text{H}]^+$  438.1709, found 438.1713.

**HPLC**: Daicel Chiralpak IA-3, *n*-hexane/isopropanol 90/10, flow rate = 0.5 mL/min, uv-vis  $\lambda = 254$  nm,  $t_{\text{R}1} = 12.1$  min (minor),  $t_{\text{R}2} = 15.9$  min (major).

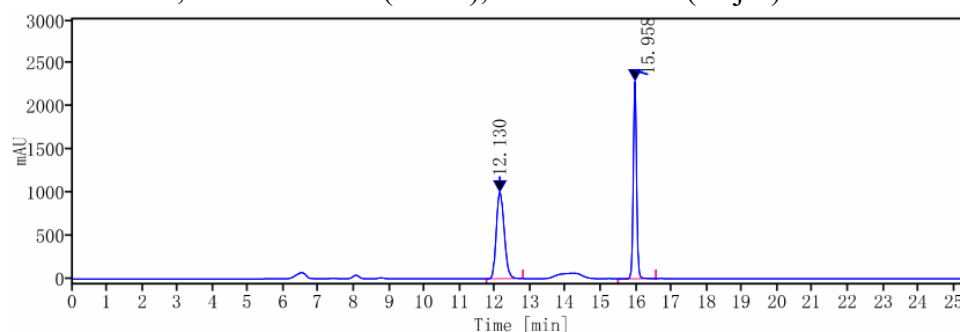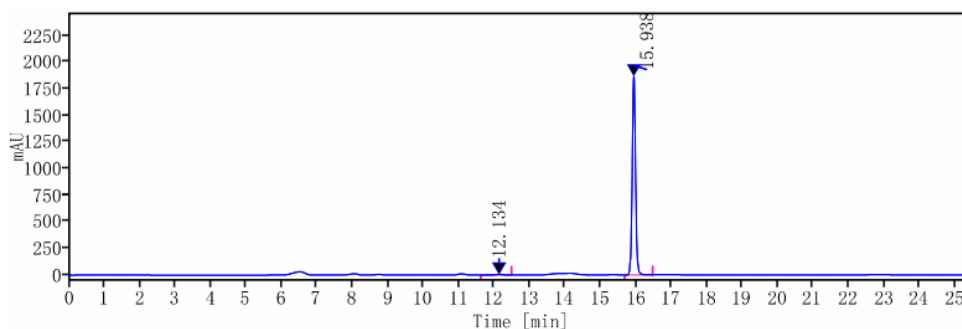

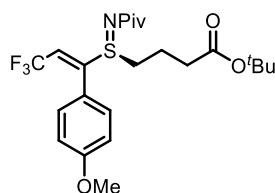

***tert-butyl 4-((S)-N-pivaloyl-S-((E)-3,3,3-trifluoro-1-(4-methoxyphenyl)prop-1-en-1-yl)sulfinimidoyl)butanoate (4o)***

30.9 mg, 65% yield, 98% ee, *E/Z* > 20/1, as a colorless oil.

$[\alpha]_{25}^D = +40.6$  ( $c = 0.064$ ,  $\text{CHCl}_3$ ).

$^1\text{H NMR}$  (300 MHz,  $\text{CDCl}_3$ )  $\delta$  7.38 – 7.34 (m, 2H), 7.00 – 6.94 (m, 2H), 6.37 (q,  $J = 7.7$  Hz, 1H), 3.85 (s, 3H), 2.87 – 2.77 (m, 1H), 2.74 – 2.65 (m, 1H), 2.38 – 2.20 (m, 2H), 2.03 – 1.81 (m, 2H), 1.38 (s, 9H), 1.28 (s, 9H) ppm.

$^{13}\text{C NMR}$  (75 MHz,  $\text{CDCl}_3$ )  $\delta$  191.3, 171.3, 161.6, 147.5 (q,  $^3J_{\text{C-F}} = 5.3$  Hz), 130.3 (q,  $^4J_{\text{C-F}} = 1.7$  Hz), 122.1 (q,  $^1J_{\text{C-F}} = 270.6$  Hz), 121.5, 120.7 (q,  $^2J_{\text{C-F}} = 35.9$  Hz), 114.7, 81.0, 55.5, 43.5, 40.6, 33.5, 28.6, 28.1, 18.8 ppm.

$^{19}\text{F NMR}$  (282 MHz,  $\text{CDCl}_3$ )  $\delta$  -56.93 ppm.

**HRMS** (ESI) calcd for  $[\text{C}_{23}\text{H}_{32}\text{F}_3\text{NO}_4\text{S} + \text{H}]^+$  476.2077, found 476.2083.

**HPLC**: Daicel Chiralpak IA-3, *n*-hexane/isopropanol 90/10, flow rate = 0.5 mL/min, uv-vis  $\lambda = 254$  nm,  $t_{\text{R}1} = 10.7$  min (minor),  $t_{\text{R}2} = 14.6$  min (major).

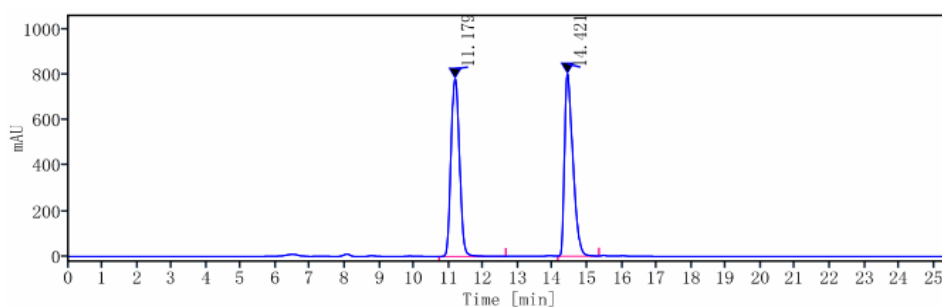

| RetTime [min] | Type | Width [min] | Area [mAU*s] | Height [mAU] | Area%   |
|---------------|------|-------------|--------------|--------------|---------|
| 11.179        | BB   | 1.9289      | 13342.3950   | 780.8948     | 49.6650 |
| 14.421        | VV   | 1.1840      | 13522.3737   | 802.2299     | 50.3350 |

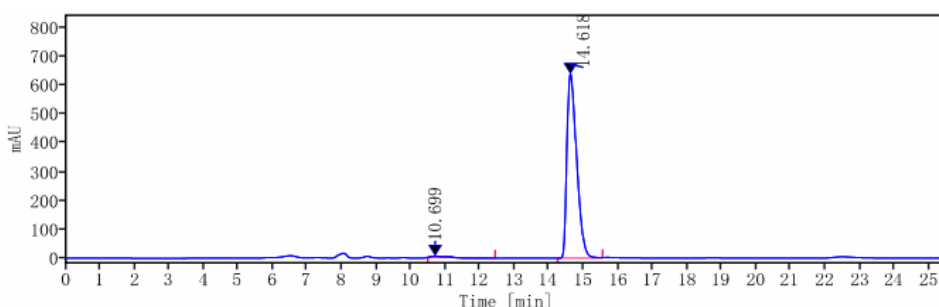

| RetTime [min] | Type | Width [min] | Area [mAU*s] | Height [mAU] | Area%   |
|---------------|------|-------------|--------------|--------------|---------|
| 10.699        | MM m | 0.3778      | 113.9194     | 4.5858       | 0.8987  |
| 14.618        | BV   | 1.3016      | 12562.4469   | 638.6626     | 99.1013 |

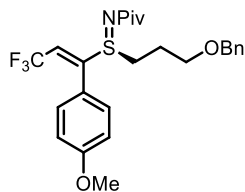

***N-((S)-3-(benzyloxy)propyl)((E)-3,3,3-trifluoro-1-(4-methoxyphenyl)prop-1-en-1-yl)- $\lambda^4$ -sulfaneylidene)pivalamide (4p)***

29.8 mg, 62% yield, 99% ee, *E/Z* > 20/1, colorless oil.

$[\alpha]_{25}^D = +31.6$  ( $c = 0.06$ ,  $\text{CHCl}_3$ ).

$^1\text{H NMR}$  (300 MHz,  $\text{CDCl}_3$ )  $\delta$  7.36 – 7.29 (m, 5H), 7.28 – 7.24 (m, 2H), 6.94 – 6.89 (m, 2H), 6.38 (q,  $J = 7.7$  Hz, 1H), 4.44 – 4.36 (m, 2H), 3.82 (s, 3H), 3.57 – 3.44 (m, 2H), 3.00 – 2.91 (m, 1H), 2.77 – 2.68 (m, 1H), 2.04 – 1.83 (m, 2H), 1.28 (s, 9H) ppm.

$^{13}\text{C NMR}$  (75 MHz,  $\text{CDCl}_3$ )  $\delta$  191.3, 161.6, 147.6 (q,  $^3J_{\text{C-F}} = 5.3$  Hz), 137.9, 130.3 (q,  $^4J_{\text{C-F}} = 1.6$  Hz), 128.5, 127.8, 127.7, 122.2 (q,  $^1J_{\text{C-F}} = 270.5$  Hz), 121.5, 120.8 (q,  $^2J_{\text{C-F}} = 35.8$  Hz), 114.6, 73.0, 67.6, 55.4, 41.5, 40.5, 28.6, 23.4 ppm.

$^{19}\text{F NMR}$  (282 MHz,  $\text{CDCl}_3$ )  $\delta$  -56.88 ppm.

**HRMS** (ESI) calcd for  $[\text{C}_{25}\text{H}_{30}\text{F}_3\text{NO}_3\text{S}+\text{H}]^+$  482.1971, found 482.1978.

**HPLC**: Daicel Chiralpak IA-3, *n*-hexane/isopropanol 90/10, flow rate = 0.5 mL/min, uv-vis  $\lambda = 254$  nm,  $t_{\text{R}1} = 14.3$  min (minor),  $t_{\text{R}2} = 15.6$  min (major).

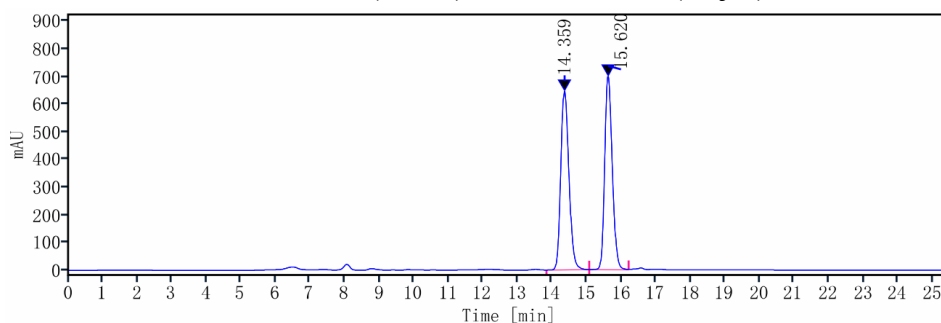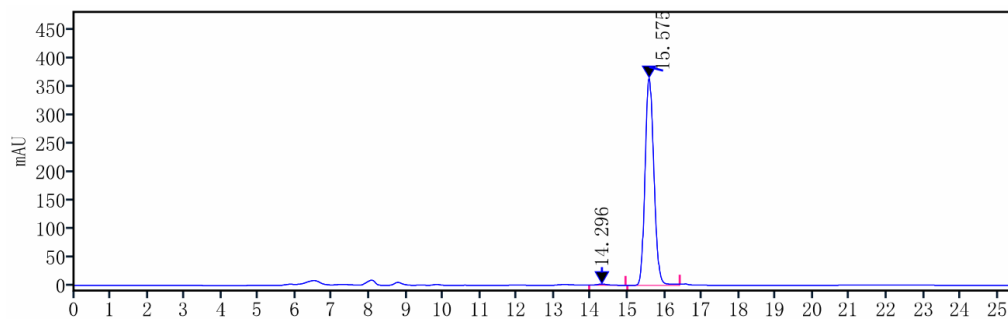

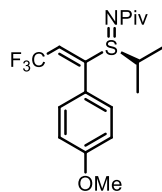

***N-((S)-isopropyl((E)-3,3,3-trifluoro-1-(4-methoxyphenyl)prop-1-en-1-yl)-λ<sup>4</sup>-sulfaneylidene)pivalamide (4q)***

24.7 mg, 66% yield, 99% ee, *E/Z* > 20/1, colorless oil.

$[\alpha]_{25}^D = +48.6$  ( $c = 0.07$ ,  $\text{CHCl}_3$ ).

<sup>1</sup>H NMR (300 MHz,  $\text{CDCl}_3$ )  $\delta$  7.39 – 7.36 (m, 2H), 6.98 – 6.95 (m, 2H), 6.26 (q,  $J = 7.8$  Hz, 1H), 3.85 (s, 3H), 2.88 – 2.79 (m, 1H), 1.29 – 1.27 (m, 12H), 1.20 (d,  $J = 6.6$  Hz, 3H) ppm.

<sup>13</sup>C NMR (75 MHz,  $\text{CDCl}_3$ )  $\delta$  191.7, 161.6, 146.3 (q,  $^3J_{\text{C-F}} = 5.4$  Hz), 130.2 (q,  $^4J_{\text{C-F}} = 1.9$  Hz), 122.3 (q,  $^1J_{\text{C-F}} = 270.4$  Hz), 122.2, 121.3 (q,  $^2J_{\text{C-F}} = 35.8$  Hz), 114.7, 55.5, 46.1, 41.0, 28.7, 18.3, 14.4 ppm.

<sup>19</sup>F NMR (282 MHz,  $\text{CDCl}_3$ )  $\delta$  -56.71 ppm.

HRMS (ESI) calcd for  $[\text{C}_{18}\text{H}_{24}\text{F}_3\text{NO}_2\text{S}+\text{H}]^+$  376.1553, found 376.1559.

HPLC: Daicel Chiralpak IA-3, *n*-hexane/isopropanol 70/30, flow rate = 0.5 mL/min, uv-vis  $\lambda = 280$  nm,  $t_{\text{R}1} = 10.3$  min (minor),  $t_{\text{R}2} = 12.9$  min (major).

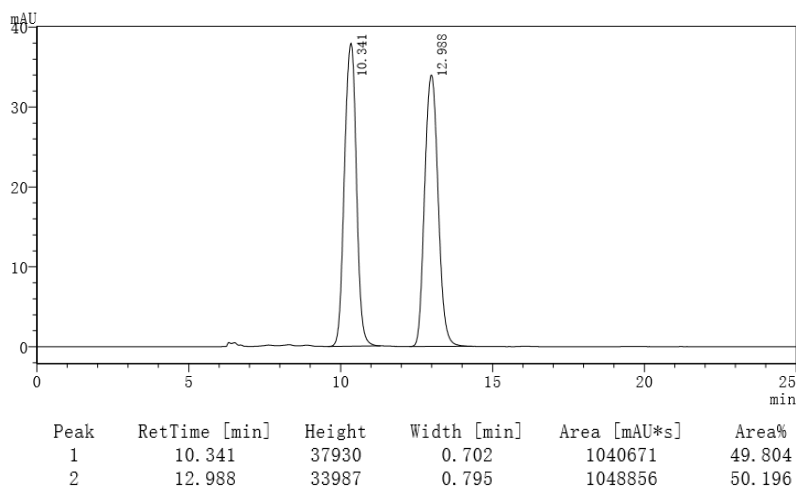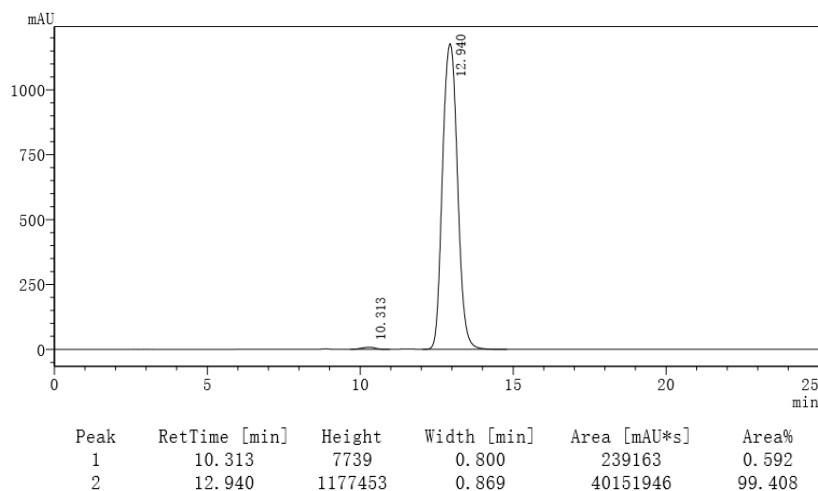

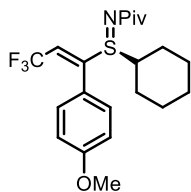

***N-((S)-cyclohexyl((E)-3,3,3-trifluoro-1-(4-methoxyphenyl)prop-1-en-1-yl)- $\lambda^4$ -sulfaneylidene)pivalamide (4r)***

31.5 mg, 76% yield, 98% ee, *E/Z* > 20/1, colorless oil.

$[\alpha]_{25}^D = +50.0$  ( $c = 0.064$ ,  $\text{CHCl}_3$ ).

$^1\text{H NMR}$  (300 MHz,  $\text{CDCl}_3$ )  $\delta$  7.38 – 7.36 (m, 2H), 6.99 – 6.94 (m, 2H), 6.25 (q,  $J = 7.8$  Hz, 1H), 3.86 (s, 3H), 2.61 – 2.51 (m, 1H), 1.86 – 1.49 (m, 7H), 1.28 (s, 9H), 1.18 – 1.10 (m, 3H) ppm.

$^{13}\text{C NMR}$  (75 MHz,  $\text{CDCl}_3$ )  $\delta$  191.5, 161.6, 145.8 (q,  $^3J_{\text{C-F}} = 5.4$  Hz), 130.2 (q,  $^4J_{\text{C-F}} = 1.7$  Hz), 122.33, 122.28 (q,  $^1J_{\text{C-F}} = 270.6$  Hz), 121.4 (q,  $^2J_{\text{C-F}} = 35.7$  Hz), 114.7, 55.5, 54.0, 40.9, 28.7, 28.5, 26.0, 25.7, 25.2, 24.4 ppm.

$^{19}\text{F NMR}$  (282 MHz,  $\text{CDCl}_3$ )  $\delta$  -56.67 ppm.

**HRMS** (ESI) calcd for  $[\text{C}_{21}\text{H}_{28}\text{F}_3\text{NO}_2\text{S}+\text{H}]^+$  416.1866, found 416.1867.

**HPLC**: Daicel Chiralpak IA-3, *n*-hexane/isopropanol 90/10, flow rate = 0.5 mL/min, uv-vis  $\lambda = 280$  nm,  $t_{\text{R}1} = 11.4$  min (major),  $t_{\text{R}2} = 14.7$  min (minor).

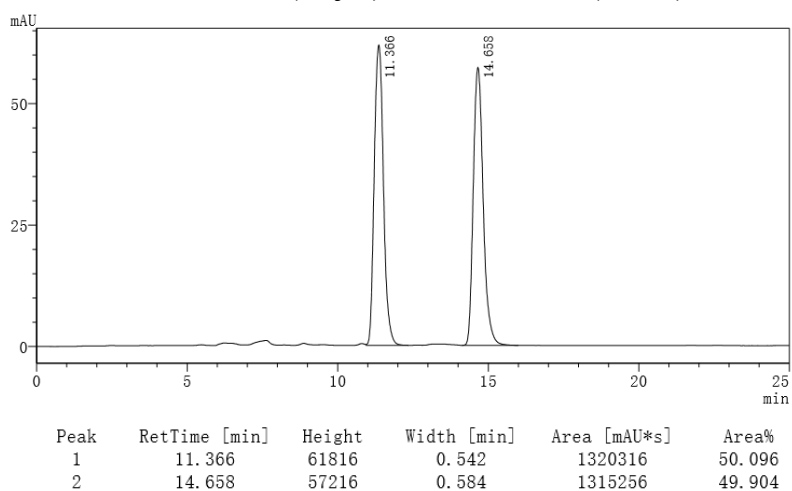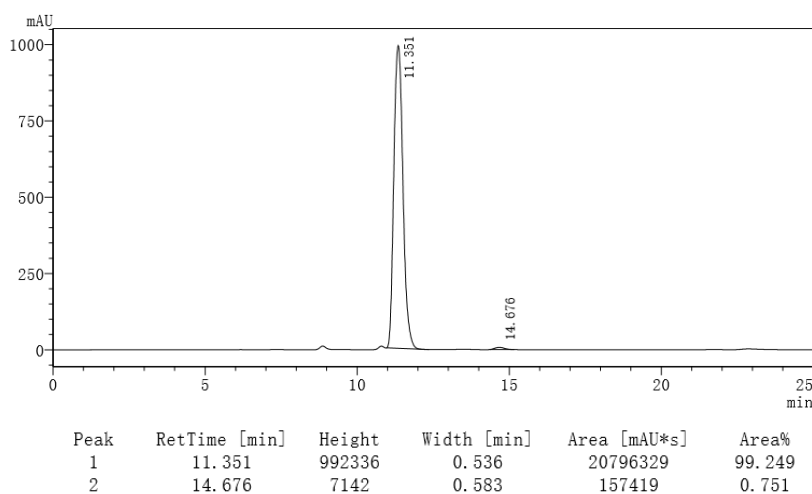

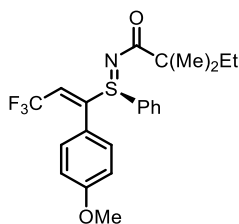

**2,2-dimethyl-N-((S)-phenyl((E)-3,3,3-trifluoro-1-(4-methoxyphenyl)prop-1-en-1-yl)- $\lambda^4$ -sulfaneylidene)butanamide (4s)**

34.3 mg, 81% yield, 96% ee, *E/Z* > 20/1, colorless oil.

$[\alpha]_{25}^D = +108.1$  ( $c = 0.086$ ,  $\text{CHCl}_3$ ).

$^1\text{H NMR}$  (300 MHz,  $\text{CDCl}_3$ )  $\delta$  7.48 – 7.43 (m, 3H), 7.38 – 7.33 (m, 2H), 7.02 – 6.97 (m, 2H), 6.81 – 6.72 (m, 3H), 3.80 (s, 3H), 1.69 (q,  $J = 7.6$  Hz, 2H), 1.26 – 1.25 (m, 6H), 0.88 (t,  $J = 7.6$  Hz, 3H) ppm.

$^{13}\text{C NMR}$  (75 MHz,  $\text{CDCl}_3$ )  $\delta$  190.0, 161.3, 150.2 (q,  $^3J_{\text{C-F}} = 5.3$  Hz), 132.7, 132.4, 130.8 (q,  $^4J_{\text{C-F}} = 1.6$  Hz), 129.6, 128.4, 122.3 (q,  $^1J_{\text{C-F}} = 270.8$  Hz), 121.59, 120.0 (q,  $^4J_{\text{C-F}} = 35.7$  Hz), 114.0, 55.4, 44.3, 34.5, 26.2, 26.0, 9.7 ppm.

$^{19}\text{F NMR}$  (282 MHz,  $\text{CDCl}_3$ )  $\delta$  -57.00 ppm.

**HRMS** (ESI) calcd for  $[\text{C}_{22}\text{H}_{24}\text{F}_3\text{NO}_2\text{S} + \text{H}]^+$  424.1553, found 424.1553.

**HPLC**: Daicel Chiralpak OD-H, *n*-hexane/isopropanol 95/5, flow rate = 0.5 mL/min, uv-vis  $\lambda = 254$  nm,  $t_{\text{R1}} = 11.8$  min (major),  $t_{\text{R2}} = 14.0$  min (minor).

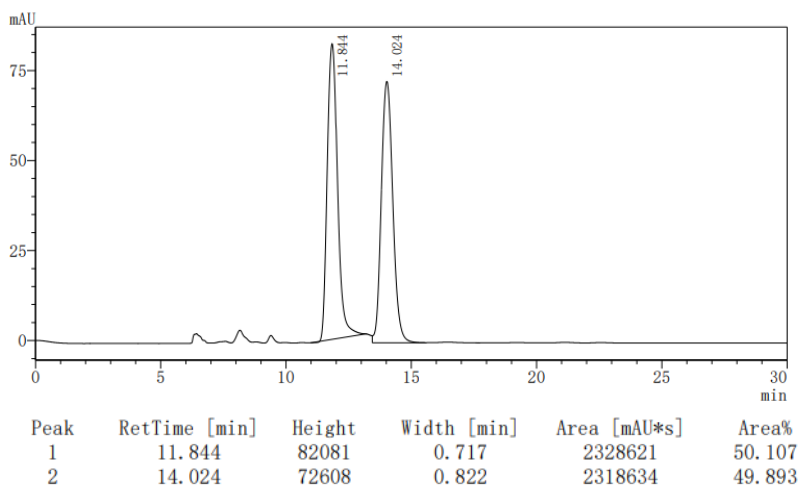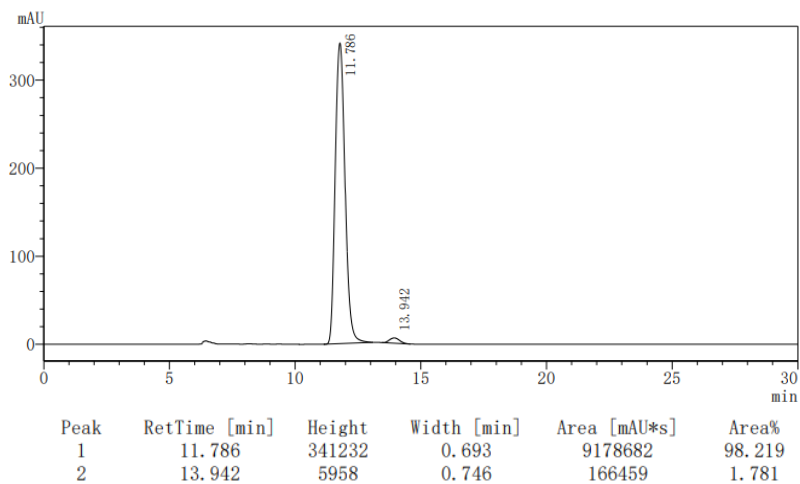

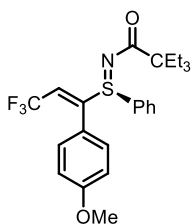

**2,2-diethyl-N-((S)-phenyl((E)-3,3,3-trifluoro-1-(4-methoxyphenyl)prop-1-en-1-yl)- $\lambda^4$ -sulfaneylidene)butanamide (4t)**

36.1 mg, 80% yield, 94% ee,  $E/Z > 20/1$ , colorless oil.

$[\alpha]_{25}^D = +118.4$  ( $c = 0.076$ ,  $\text{CHCl}_3$ ).

$^1\text{H NMR}$  (400 MHz,  $\text{CDCl}_3$ )  $\delta$  7.46 – 7.42 (m, 3H), 7.37 – 7.33 (m, 2H), 7.03 – 7.00 (m, 2H), 6.85 – 6.78 (m, 3H), 3.79 (s, 3H), 1.76 – 1.66 (m, 6H), 0.79 (t,  $J = 7.5$  Hz, 9H) ppm.

$^{13}\text{C NMR}$  (101 MHz,  $\text{CDCl}_3$ )  $\delta$  189.1, 161.2, 150.3 (q,  $^3J_{\text{C-F}} = 5.3$  Hz), 133.2, 132.3, 130.8 (q,  $^4J_{\text{C-F}} = 1.7$  Hz), 129.5, 128.4, 122.3 (q,  $^1J_{\text{C-F}} = 273.3$  Hz), 121.7, 120.0 (q,  $^2J_{\text{C-F}} = 36.0$  Hz), 114.0, 55.4, 51.2, 27.2, 8.7 ppm.

$^{19}\text{F NMR}$  (376 MHz,  $\text{CDCl}_3$ )  $\delta$  -56.93 ppm.

**HRMS** (ESI) calcd for  $[\text{C}_{24}\text{H}_{28}\text{F}_3\text{NO}_2\text{S} + \text{H}]^+$  452.1866, found 452.1864.

**HPLC**: Daicel Chiralpak IA-3,  $n$ -hexane/isopropanol 97/3, flow rate = 0.5 mL/min, uv-vis  $\lambda = 280$  nm,  $t_{\text{R}1} = 36.0$  min (major),  $t_{\text{R}2} = 42.7$  min (minor).

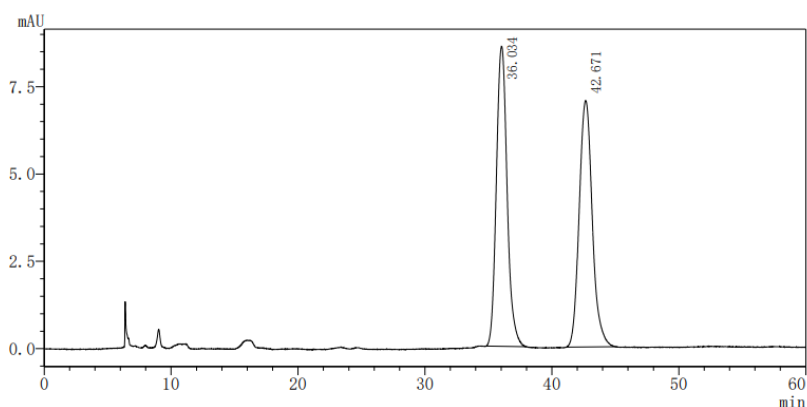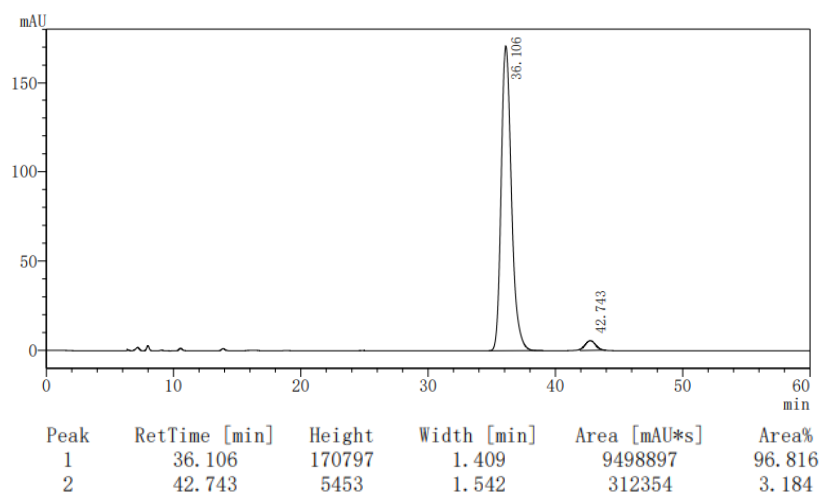

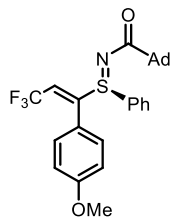

**(3*S*,5*S*,7*S*)-*N*-((*S*)-phenyl(*E*)-3,3,3-trifluoro-1-(4-methoxyphenyl)prop-1-en-1-yl)- $\lambda^4$ -sulfaneylidene) adamantane-1-carboxamide (**4u**)**

35.6 mg, 73% yield, 94% ee, *E/Z* > 20/1, colorless oil.

$[\alpha]_{25}^D = +45.8$  ( $c = 0.07$ ,  $\text{CHCl}_3$ ).

**$^1\text{H}$  NMR** (300 MHz,  $\text{CDCl}_3$ )  $\delta$  7.51 – 7.45 (m, 3H), 7.41 – 7.35 (m, 2H), 7.02 – 6.97 (m, 2H), 6.83 – 6.80 (m, 2H), 6.73 (q,  $J = 7.5$  Hz, 1H), 3.82 (s, 3H), 2.04 (s, 9H), 1.77 (s, 6H) ppm.

**$^{13}\text{C}$  NMR** (75 MHz,  $\text{CDCl}_3$ )  $\delta$  189.8, 161.2, 150.2 (q,  $^3J_{\text{C-F}} = 5.3$  Hz), 132.5, 132.4, 130.8 (q,  $^4J_{\text{C-F}} = 1.4$  Hz), 129.6, 128.5, 122.3 (q,  $^1J_{\text{C-F}} = 270.8$  Hz), 121.6, 119.9 (q,  $^2J_{\text{C-F}} = 35.7$  Hz), 114.0, 55.4, 42.7, 40.4, 37.0, 28.7 ppm.

**$^{19}\text{F}$  NMR** (282 MHz,  $\text{CDCl}_3$ )  $\delta$  -56.97 ppm.

**HRMS** (ESI) calcd for  $[\text{C}_{27}\text{H}_{28}\text{F}_3\text{NO}_2\text{S} + \text{H}]^+$  488.1866, found 488.1864.

**HPLC**: Daicel Chiralpak OD-H, *n*-hexane/isopropanol 95/5, flow rate = 0.5 mL/min, uv-vis  $\lambda = 280$  nm,  $t_{\text{R}1} = 15.6$  min (major),  $t_{\text{R}2} = 21.7$  min (minor).

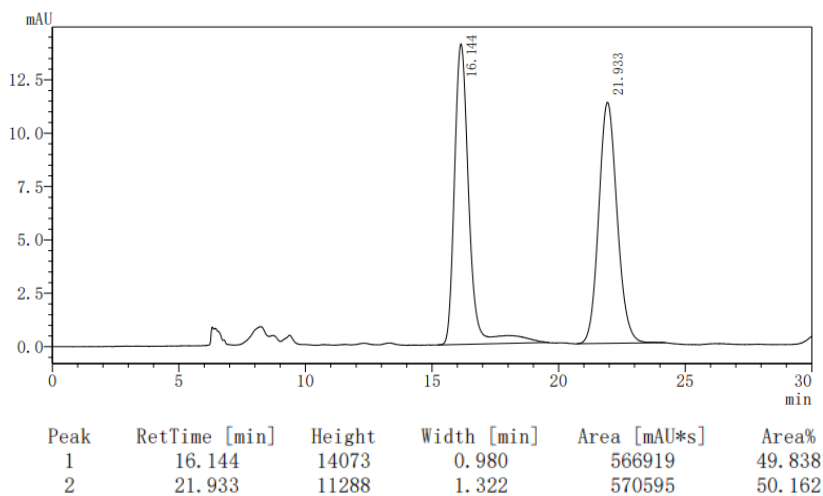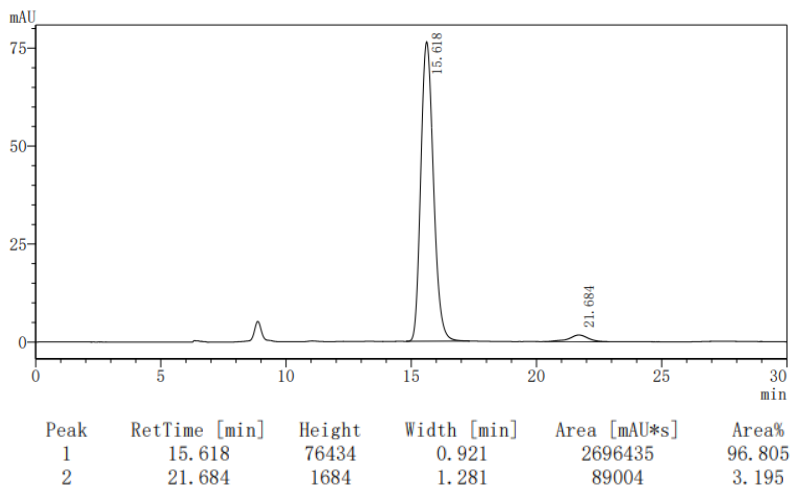

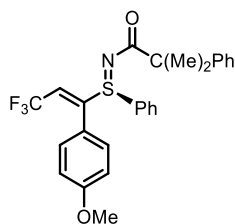

**2-methyl-2-phenyl-N-((S)-phenyl((E)-3,3,3-trifluoro-1-(4-methoxyphenyl)prop-1-en-1-yl)- $\lambda^4$ -sulfaneylidene)propanamide (4v)**

36.3 mg, 77% yield, 94% ee,  $E/Z > 20/1$ , colorless oil.

$[\alpha]_{25}^D = +87.5$  ( $c = 0.088$ ,  $\text{CHCl}_3$ ).

$^1\text{H NMR}$  (400 MHz,  $\text{CDCl}_3$ )  $\delta$  7.52 – 7.49 (m, 2H), 7.45 – 7.41 (m, 1H), 7.35 – 7.28 (m, 7H), 7.23 – 7.21 (m, 1H), 6.91 (d,  $J = 8.7$  Hz, 2H), 6.76 (d,  $J = 8.7$  Hz, 2H), 6.40 (q,  $J = 7.5$  Hz, 1H), 3.78 (s, 3H), 1.98 – 1.64 (m, 6H) ppm.

$^{13}\text{C NMR}$  (75 MHz,  $\text{CDCl}_3$ )  $\delta$  188.2, 161.2, 150.0 (q,  $^3J_{\text{C-F}} = 5.4$  Hz), 147.5, 132.5, 132.2, 130.8 (q,  $^4J_{\text{C-F}} = 1.5$  Hz), 129.5, 128.4, 128.2, 126.09, 126.06, 122.1 (q,  $^1J_{\text{C-F}} = 270.9$  Hz), 121.4, 120.1 (q,  $^2J_{\text{C-F}} = 35.6$  Hz), 114.0, 55.4, 48.2, 27.7, 27.3 ppm.

$^{19}\text{F NMR}$  (282 MHz,  $\text{CDCl}_3$ )  $\delta$  -57.03 ppm.

**HRMS** (ESI) calcd for  $[\text{C}_{26}\text{H}_{24}\text{F}_3\text{NO}_2\text{S} + \text{H}]^+$  472.1553, found 472.1548.

**HPLC**: Daicel Chiralpak OD-H, *n*-hexane/isopropanol 90/10, flow rate = 0.5 mL/min, uv-vis  $\lambda = 280$  nm,  $t_{\text{R}1} = 12.3$  min (major),  $t_{\text{R}2} = 15.7$  min (minor)

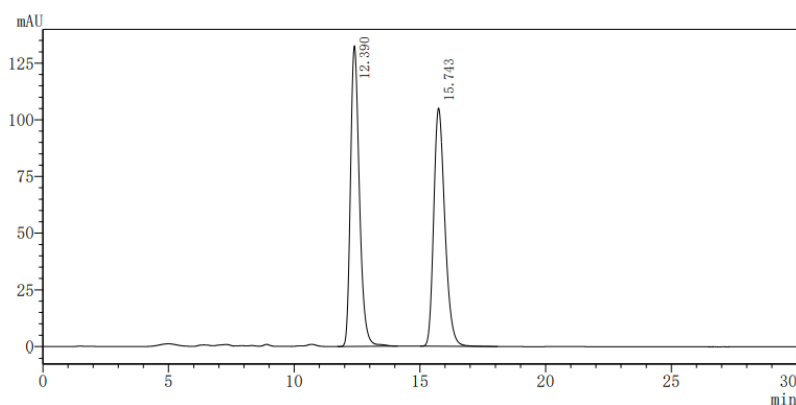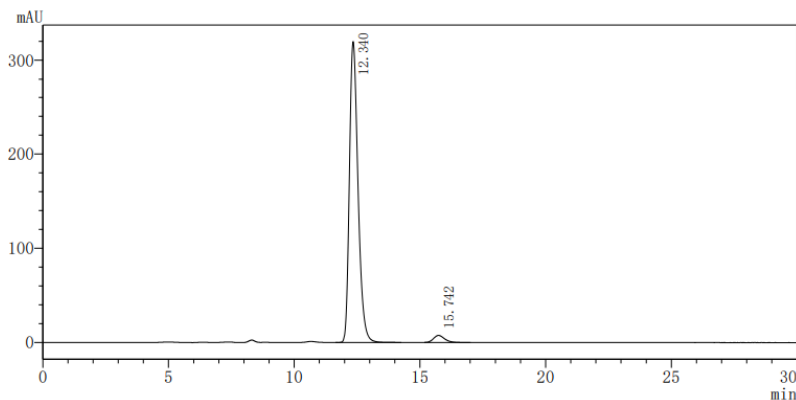

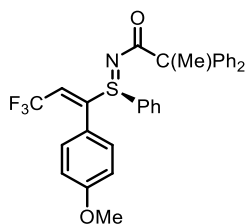

**2,2-diphenyl-N-((S)-phenyl((E)-3,3,3-trifluoro-1-(4-methoxyphenyl)prop-1-en-1-yl)- $\lambda^4$ -sulfaneylidene)propanamide (4w)**

39.5 mg, 74% yield, 95% ee,  $E/Z > 20/1$ , colorless oil.

$[\alpha]_{25}^D = +76.9$  ( $c = 0.078$ ,  $\text{CHCl}_3$ ).

$^1\text{H NMR}$  (400 MHz,  $\text{CDCl}_3$ )  $\delta$  7.46 – 7.42 (m, 1H), 7.37 – 7.35 (m, 3H), 7.34 – 7.31 (m, 5H), 7.29 – 7.26 (m, 4H), 7.25 – 7.19 (m, 3H), 6.92 – 6.89 (m, 2H), 6.76 – 6.74 (m, 2H), 6.43 (q,  $J = 7.5$  Hz, 1H), 3.77 (s, 3H), 2.05 (s, 3H) ppm.

$^{13}\text{C NMR}$  (101 MHz,  $\text{CDCl}_3$ )  $\delta$  186.1, 161.2, 149.5 (q,  $^3J_{\text{C-F}} = 5.3$  Hz), 147.3, 146.9, 132.5, 132.3, 130.8 (q,  $^4J_{\text{C-F}} = 1.3$  Hz), 129.6, 128.7, 128.5, 128.4, 127.8, 127.7, 126.2, 126.1, 122.0 (q,  $^1J_{\text{C-F}} = 273.7$  Hz), 121.3, 120.6 (q,  $^2J_{\text{C-F}} = 35.9$  Hz), 114.0, 58.4, 55.4, 28.3 ppm.

$^{19}\text{F NMR}$  (376 MHz,  $\text{CDCl}_3$ )  $\delta$  -57.05 ppm.

**HRMS** (ESI) calcd for  $[\text{C}_{31}\text{H}_{26}\text{F}_3\text{NO}_2\text{S} + \text{H}]^+$  534.1709, found 534.1713.

**HPLC**: Daicel Chiralpak IA-3, *n*-hexane/isopropanol 90/10, flow rate = 0.5 mL/min, uv-vis  $\lambda = 254$  nm,  $t_{\text{R1}} = 29.8$  min (major),  $t_{\text{R2}} = 40.0$  min (minor).

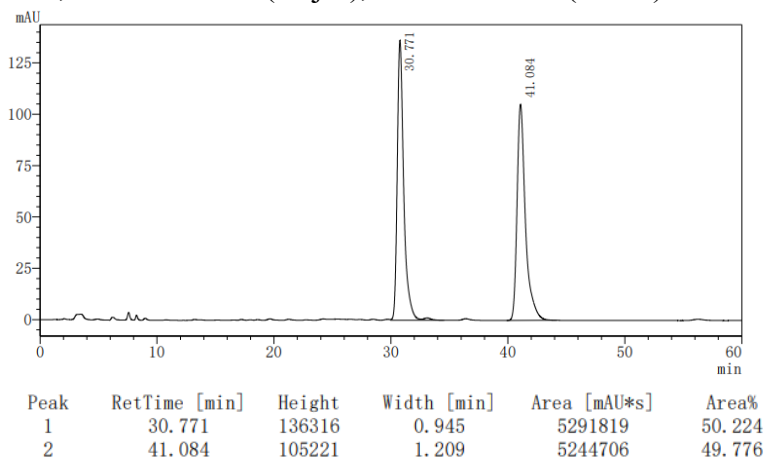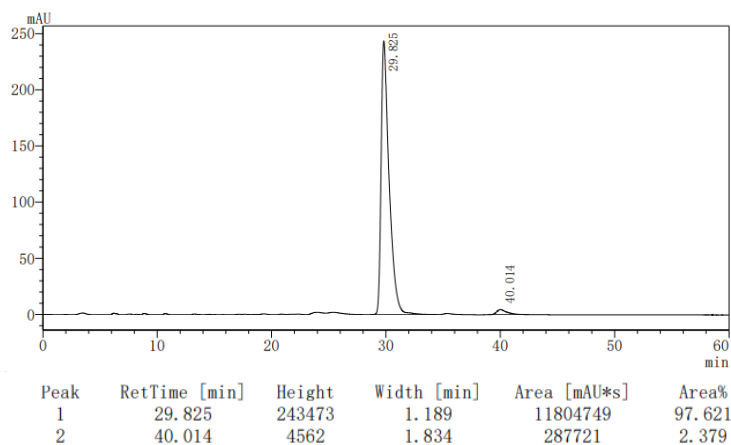

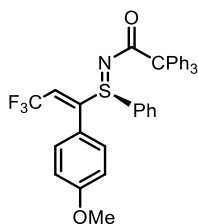

**2,2,2-triphenyl-N-((S)-phenyl(*E*)-3,3,3-trifluoro-1-(4-methoxyphenyl)prop-1-en-1-yl)- $\lambda^4$ -sulfaneylidene)acetamide (4x)**

44.1 mg, 75% yield, 94% ee, *E/Z* > 20/1, colorless oil.

$[\alpha]_{25}^D = +104.8$  ( $c = 0.062$ ,  $\text{CHCl}_3$ ).

$^1\text{H NMR}$  (300 MHz,  $\text{CDCl}_3$ )  $\delta$  7.46 – 7.40 (m, 1H), 7.36 – 7.31 (m, 6H), 7.30 – 7.27 (m, 4H), 7.25 – 7.17 (m, 7H), 6.93 – 6.89 (m, 2H), 6.77 – 6.72 (m, 2H), 6.46 (q,  $J = 7.6$  Hz, 1H), 3.77 (s, 3H) ppm.

$^{13}\text{C NMR}$  (75 MHz,  $\text{CDCl}_3$ )  $\delta$  184.2, 161.3, 149.0 (q,  $^3J_{\text{C-F}} = 5.3$  Hz), 145.3, 132.55, 132.49, 130.9, 130.8 (q,  $^4J_{\text{C-F}} = 1.4$  Hz), 129.6, 128.5, 127.3, 126.3, 122.0 (q,  $^1J_{\text{C-F}} = 271.1$  Hz), 121.32, 121.30 (q,  $^2J_{\text{C-F}} = 35.3$  Hz), 114.1, 69.5, 55.4 ppm.

$^{19}\text{F NMR}$  (282 MHz,  $\text{CDCl}_3$ )  $\delta$  -56.99 ppm.

**HRMS** (ESI) calcd for  $[\text{C}_{36}\text{H}_{28}\text{F}_3\text{NO}_2\text{S} + \text{H}]^+$  596.1866, found 596.1860.

**HPLC**: Daicel Chiralpak IA-3, *n*-hexane/isopropanol 70/30, flow rate = 0.5 mL/min, uv-vis  $\lambda = 280$  nm,  $t_{\text{R}1} = 9.5$  min (major),  $t_{\text{R}2} = 12.0$  min (minor).

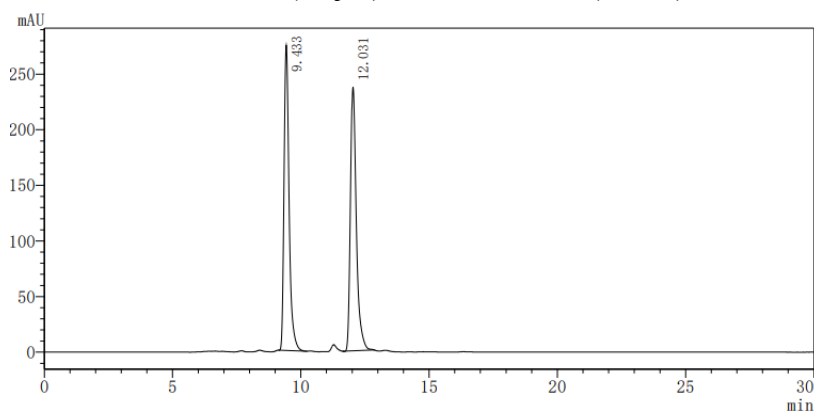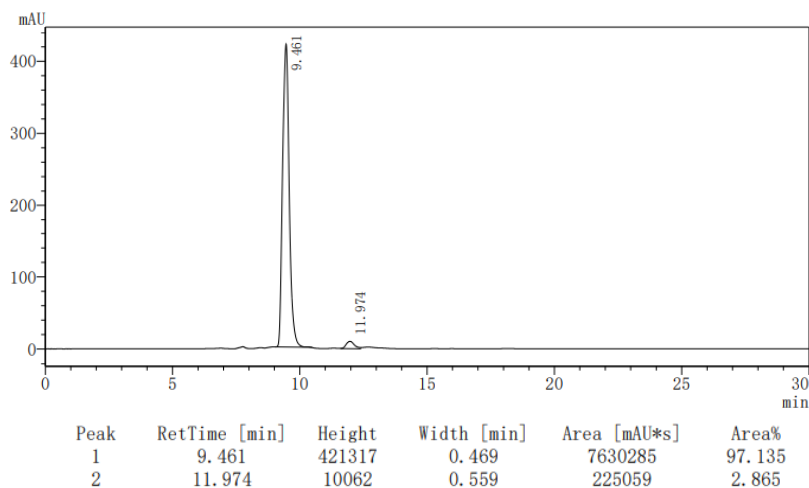

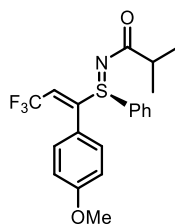

***N-((S)-phenyl((E)-3,3,3-trifluoro-1-(4-methoxyphenyl)prop-1-en-1-yl)-λ<sup>4</sup>-sulfaneylidene)isobutyramide (4y)***

30.8 mg, 78% yield, 94% ee, *E/Z* > 20/1, colorless oil.

$[\alpha]_{25}^D = +111.7$  ( $c = 0.06$ ,  $\text{CHCl}_3$ ).

**<sup>1</sup>H NMR** (400 MHz,  $\text{CDCl}_3$ )  $\delta$  7.51 – 7.46 (m, 3H), 7.41 – 7.35 (m, 2H), 7.01 – 6.97 (m, 2H), 6.81 – 6.70 (m, 2H), 6.73 (q,  $J = 7.5$  Hz, 1H), 3.79 (s, 3H), 2.82 – 2.75 (m, 1H), 1.26 (d,  $J = 6.9$  Hz, 3H), 1.22 (d,  $J = 6.9$  Hz, 3H) ppm.

**<sup>13</sup>C NMR** (101 MHz,  $\text{CDCl}_3$ )  $\delta$  189.0, 161.3, 149.7 (q,  $^3J_{\text{C-F}} = 5.3\text{Hz}$ ), 132.7, 132.0, 130.8 (q,  $^4J_{\text{C-F}} = 1.6\text{Hz}$ ), 129.8, 128.8, 122.2 (q,  $^1J_{\text{C-F}} = 273.6\text{Hz}$ ), 121.4, 120.1 (q,  $^2J_{\text{C-F}} = 36.1\text{Hz}$ ), 114.1, 55.4, 37.0, 20.8, 20.4 ppm.

**<sup>19</sup>F NMR** (376 MHz,  $\text{CDCl}_3$ )  $\delta$  -56.98 ppm.

**HRMS** (ESI) calcd for  $[\text{C}_{20}\text{H}_{20}\text{F}_3\text{NO}_2\text{S} + \text{H}]^+$  396.1240, found 396.1238.

**HPLC**: Daicel Chiralpak OD-H, *n*-hexane/isopropanol 90/10, flow rate = 0.5 mL/min, uv-vis  $\lambda = 280$  nm,  $t_{\text{R}1} = 10.8$  min (major),  $t_{\text{R}2} = 13.9$  min (minor)

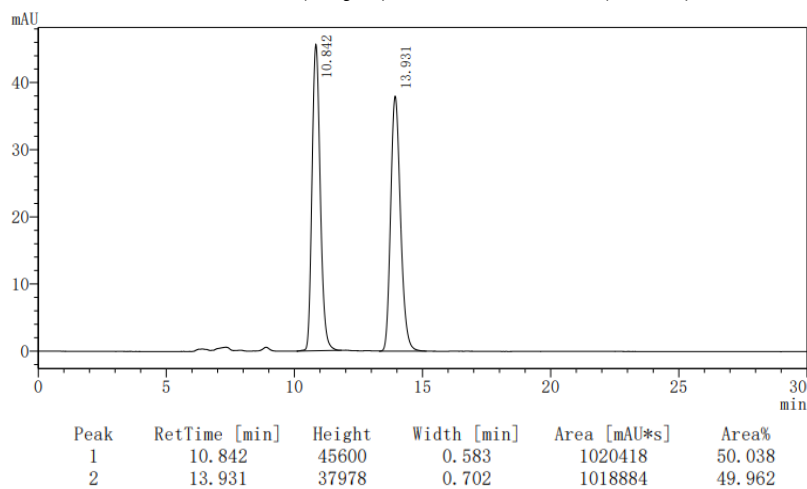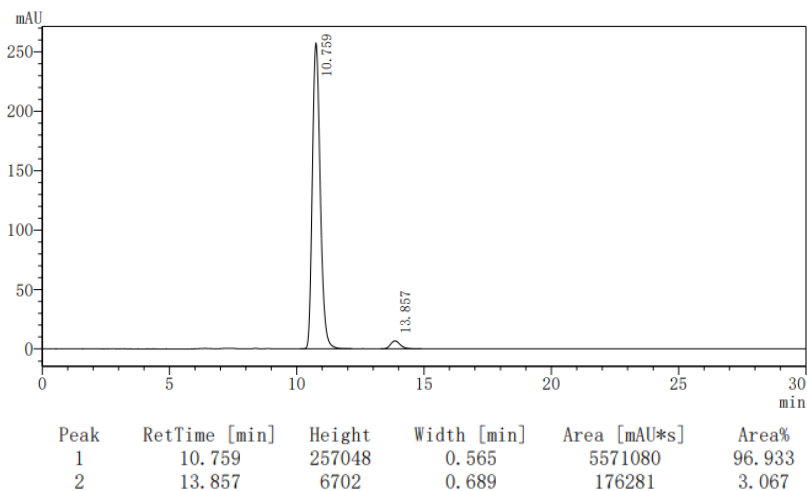

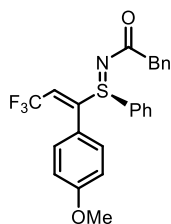

**2-phenyl-N-((S)-phenyl((E)-3,3,3-trifluoro-1-(4-methoxyphenyl)prop-1-en-1-yl)- $\lambda^4$ -sulfaneylidene)acetamide (4z)**

29.7 mg, 67% yield, 93% ee,  $E/Z > 20/1$ , colorless oil.

$[\alpha]_{25}^D = +100.0$  ( $c = 0.064$ ,  $\text{CHCl}_3$ ).

$^1\text{H NMR}$  (400 MHz,  $\text{CDCl}_3$ )  $\delta$  7.49 – 7.30 (m, 9H), 7.26 – 7.22 (m, 1H), 6.92 (d,  $J = 8.8$  Hz, 2H), 6.76 (d,  $J = 8.8$  Hz, 2H), 6.58 (q,  $J = 7.5$  Hz, 1H), 3.84 – 3.73 (m, 5H) ppm.

$^{13}\text{C NMR}$  (101 MHz,  $\text{CDCl}_3$ )  $\delta$  182.8, 161.2, 149.3 (q,  $^3J_{\text{C-F}} = 5.3\text{Hz}$ ), 137.4, 132.8, 131.7, 130.8 (q,  $^4J_{\text{C-F}} = 1.4\text{Hz}$ ), 129.8, 129.4, 128.8, 128.5, 126.5, 122.1 (q,  $^1J_{\text{C-F}} = 273.6\text{Hz}$ ), 121.1, 120.4 (q,  $^2J_{\text{C-F}} = 36.1\text{Hz}$ ), 118.0, 114.07, 55.4, 45.3 ppm.

$^{19}\text{F NMR}$  (376 MHz,  $\text{CDCl}_3$ )  $\delta$  -57.02 ppm.

**HRMS** (ESI) calcd for  $[\text{C}_{24}\text{H}_{20}\text{F}_3\text{NO}_2\text{S} + \text{H}]^+$  444.1240, found 444.1238.

**HPLC**: Daicel Chiralpak IA-3,  $n$ -hexane/isopropanol 70/30, flow rate = 0.5 mL/min, uv-vis  $\lambda = 280$  nm,  $t_{\text{R}1} = 12.8$  min (major),  $t_{\text{R}2} = 21.8$  min (minor).

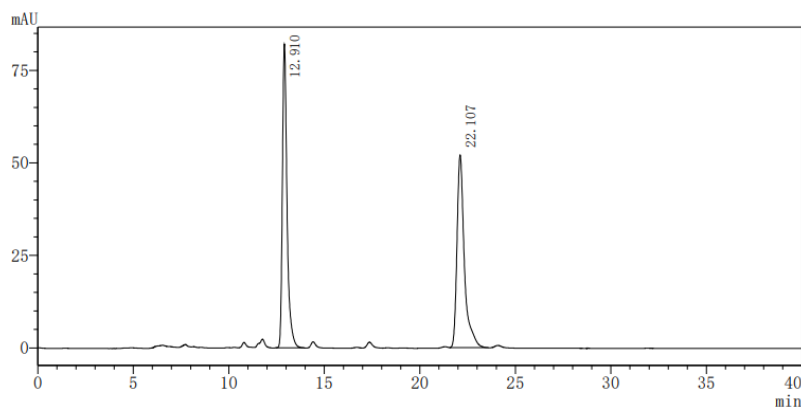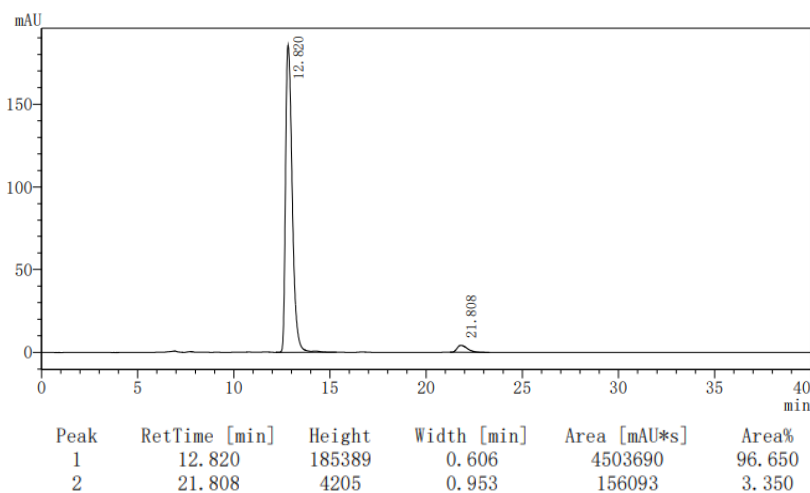

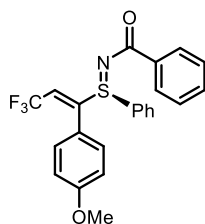

***N-((S)-phenyl((E)-3,3,3-trifluoro-1-(4-methoxyphenyl)prop-1-en-1-yl)-λ<sup>4</sup>-sulfaneylidene)benzamide (4aa)***

37.8 mg, 88% yield, 89% ee, *E/Z* > 20/1, colorless oil.

$[\alpha]_{25}^D = +119.4$  ( $c = 0.072$ ,  $\text{CHCl}_3$ ).

<sup>1</sup>H NMR (300 MHz,  $\text{CDCl}_3$ )  $\delta$  8.28 – 8.25 (m, 2H), 7.57 – 7.51 (m, 2H), 7.52 – 7.36 (m, 6H), 7.06 – 6.99 (m, 2H), 6.89 (q,  $J = 7.4$  Hz, 1H), 6.84 – 6.79 (m, 2H), 3.80 (s, 3H) ppm.

<sup>13</sup>C NMR (75 MHz,  $\text{CDCl}_3$ )  $\delta$  176.6, 161.3, 149.7 (q,  $^3J_{\text{C-F}} = 5.3$  Hz), 136.0, 132.8, 132.3, 131.4, 130.8 (q,  $^4J_{\text{C-F}} = 1.6$  Hz), 129.8, 129.1, 128.7, 128.1, 122.2 (q,  $^1J_{\text{C-F}} = 271.0$  Hz), 121.2, 120.6 (q,  $^2J_{\text{C-F}} = 35.6$  Hz), 114.1, 55.4 ppm.

<sup>19</sup>F NMR (282 MHz,  $\text{CDCl}_3$ )  $\delta$  -56.82 ppm.

HRMS (ESI) calcd for  $[\text{C}_{23}\text{H}_{18}\text{F}_3\text{NO}_2\text{S} + \text{H}]^+$  430.1083, found 430.1081.

HPLC: Daicel Chiralpak IA-3, *n*-hexane/isopropanol 70/30, flow rate = 0.5 mL/min, uv-vis  $\lambda = 280$  nm,  $t_{\text{R}1} = 13.4$  min (major),  $t_{\text{R}2} = 27.7$  min (minor).

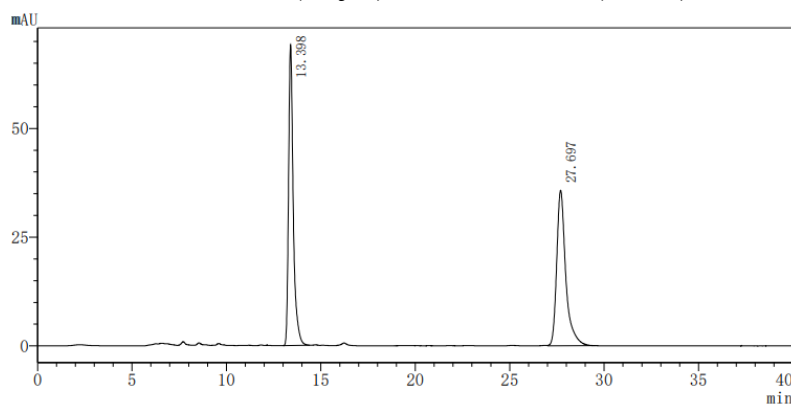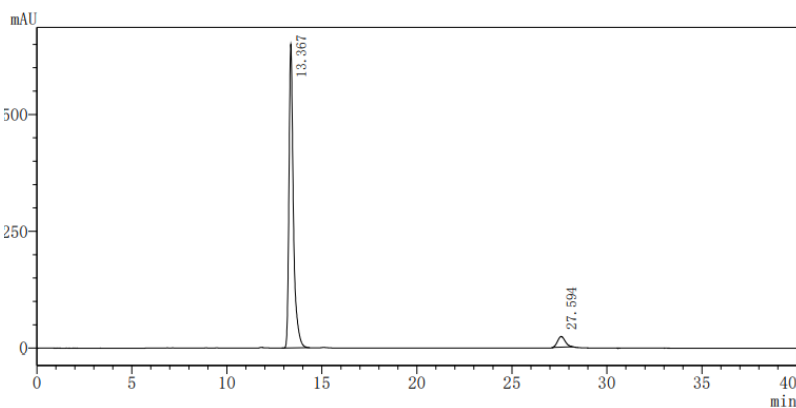

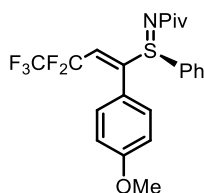

***N-((S)-((E)-3,3,4,4,4-pentafluoro-1-(4-methoxyphenyl)but-1-en-1-yl)(phenyl)- $\lambda^4$ -sulfaneylidene)pivalamide (4ab)***

32.6 mg, 71% yield, 93% ee, *E/Z* > 20/1, colorless oil.

$[\alpha]_{25}^D = +55.8$  ( $c = 0.068$ ,  $\text{CHCl}_3$ ).

$^1\text{H NMR}$  (300 MHz,  $\text{CDCl}_3$ )  $\delta$  7.50 – 7.43 (m, 3H), 7.40 – 7.34 (m, 2H), 7.00 – 6.92 (m, 2H), 6.85 – 6.76 (m, 2H), 6.69 (dd,  $J = 15.8, 11.6$  Hz, 1H), 3.80 (s, 3H), 1.30 (s, 9H) ppm.

$^{13}\text{C NMR}$  (101 MHz,  $\text{CDCl}_3$ )  $\delta$  190.5, 161.2, 152.2 (dd,  $J = 5.6, 2.6$  Hz), 132.5, 132.3, 130.9 (t,  $J = 1.9$  Hz), 129.6, 128.5, 121.6, 118.7 (qt,  $J = 287.6, 36.2$  Hz), 117.2 (t,  $J = 23.0$  Hz), 113.8, 112.0 (ddt,  $J = 257.1, 254.3, 39.1$  Hz), 55.4, 40.7, 28.6 ppm.

$^{19}\text{F NMR}$  (282 MHz,  $\text{CDCl}_3$ )  $\delta$  -85.00 (t,  $J = 2.6$  Hz, 3F), -106.91 (ddq,  $J = 271.2, 11.8, 2.9$  Hz, 1F), -112.51 (ddq,  $J = 271.1, 15.6, 2.5$  Hz, 1F) ppm.

**HRMS** (ESI) calcd for  $[\text{C}_{22}\text{H}_{22}\text{F}_5\text{NO}_2\text{S} + \text{H}]^+$  460.1364, found 460.1366.

**HPLC**: Daicel Chiralpak IA-3, *n*-hexane/isopropanol 90/10, flow rate = 0.5 mL/min, uv-vis  $\lambda = 280$  nm,  $t_{R1} = 11.7$  min (major),  $t_{R2} = 20.6$  min (minor).

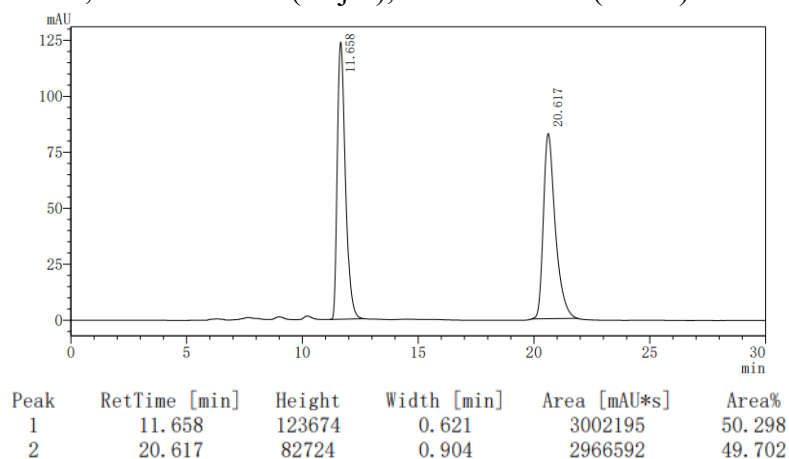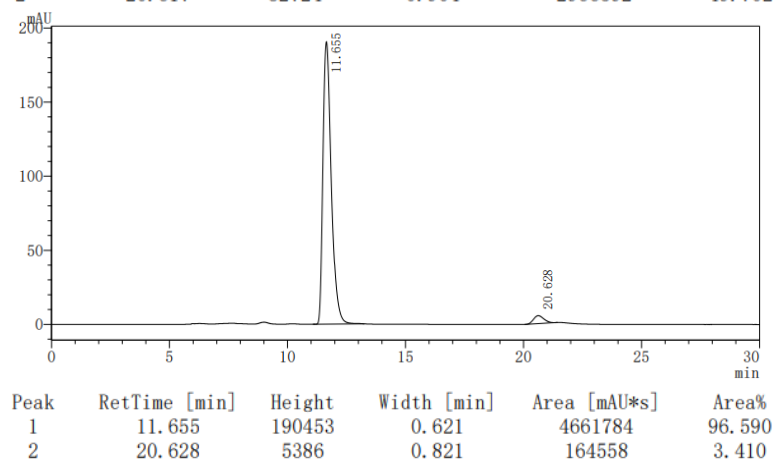

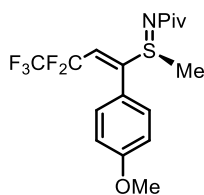

***N-((S)-methyl((E)-3,3,4,4,4-pentafluoro-1-(4-methoxyphenyl)but-1-en-1-yl)-λ<sup>4</sup>-sulfaneylidene)pivalamide (4ac)***

26.2 mg, 66% yield, 94% ee, *E/Z* > 20/1, colorless oil.

$[\alpha]_{25}^D = +71.9$  ( $c = 0.064$ ,  $\text{CHCl}_3$ ).

<sup>1</sup>H NMR (300 MHz,  $\text{CDCl}_3$ )  $\delta$  7.37 – 7.34 (m, 2H), 6.99 – 6.94 (m, 2H), 6.39 (dd,  $J = 16.2, 11.3$  Hz, 1H), 3.85 (s, 3H), 2.49 (s, 3H), 1.26 (s, 9H) ppm.

<sup>13</sup>C NMR (101 MHz,  $\text{CDCl}_3$ )  $\delta$  191.0, 161.6, 151.4 (dd,  $J = 5.9, 2.4$  Hz), 130.5 (t,  $J = 2.3$  Hz), 121.5, 118.7 (qt,  $J = 287.4, 36.6$  Hz), 117.4 (t,  $J = 23.3$  Hz), 114.5, 111.9 (ddt,  $J = 257.1, 253.6, 39.3$  Hz), 55.5, 40.2, 30.3, 28.5 ppm.

<sup>19</sup>F NMR (282 MHz,  $\text{CDCl}_3$ )  $\delta$  -85.06 (t,  $J = 2.6$  Hz, 3F), -105.73 (dq,  $J = 272.1, 2.8$  Hz, 1F), -113.16 (dq,  $J = 271.7, 2.2$  Hz, 1F) ppm.

HRMS (ESI) calcd for  $[\text{C}_{17}\text{H}_{20}\text{F}_5\text{NO}_2\text{S} + \text{H}]^+$  398.1208, found 398.1205.

HPLC: Daicel Chiralpak IA-3, *n*-hexane/isopropanol 90/10, flow rate = 0.5 mL/min, uv-vis  $\lambda = 254$  nm,  $t_{R1} = 14.1$  min (minor),  $t_{R2} = 16.5$  min (major).

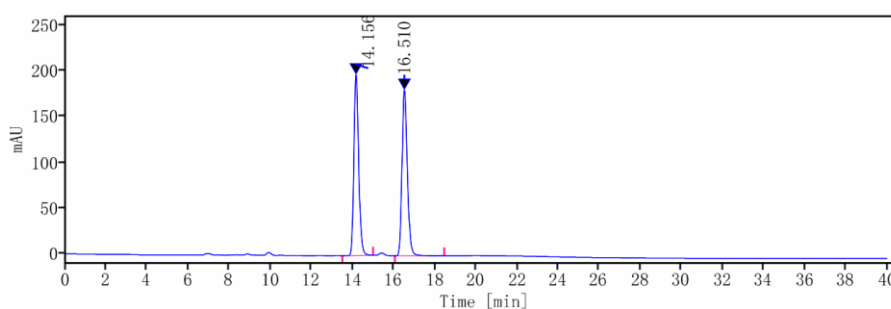

| RetTime [min] | Type | Width [min] | Area [mAU*s] | Height [mAU] | Area%   |
|---------------|------|-------------|--------------|--------------|---------|
| 14.156        | BB   | 1.4919      | 3242.5079    | 198.4528     | 49.7945 |
| 16.510        | BB   | 2.3933      | 3269.2706    | 181.8090     | 50.2055 |

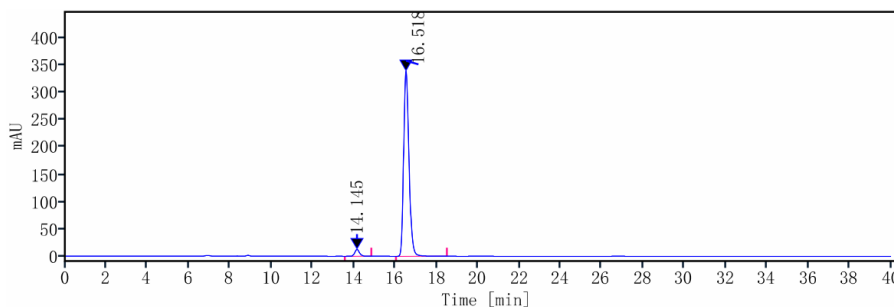

| RetTime [min] | Type | Width [min] | Area [mAU*s] | Height [mAU] | Area%   |
|---------------|------|-------------|--------------|--------------|---------|
| 14.145        | BB   | 1.2900      | 204.8254     | 12.5146      | 3.2350  |
| 16.518        | BB   | 2.4617      | 6126.6668    | 340.3341     | 96.7650 |

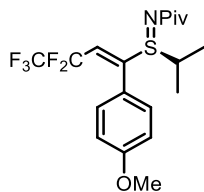

***N-((S)-isopropyl((E)-3,3,4,4,4-pentafluoro-1-(4-methoxyphenyl)but-1-en-1-yl)-λ<sup>4</sup>-sulfaneylidene)pivalamide (4ad)***

31.3 mg, 74% yield, 98% ee, *E/Z* > 20/1, colorless oil.

$[\alpha]_{25}^D = +23.3$  ( $c = 0.06$ ,  $\text{CHCl}_3$ ).

<sup>1</sup>H NMR (300 MHz,  $\text{CDCl}_3$ )  $\delta$  7.38 – 7.36 (m, 2H), 6.99 – 6.94 (m, 2H), 6.24 (dd,  $J = 16.5, 11.7$  Hz, 1H), 3.85 (s, 3H), 2.91 – 2.78 (m, 1H), 1.30 – 1.27 (m, 12H), 1.20 (d,  $J = 6.6$  Hz, 3H) ppm.

<sup>13</sup>C NMR (101 MHz,  $\text{CDCl}_3$ )  $\delta$  191.5, 161.6, 148.3 (dd,  $J = 5.7, 2.4$  Hz), 130.3 (t,  $J = 2.4$  Hz), 122.3, 118.8 (qt,  $J = 287.4, 36.7$  Hz), 118.6 (t,  $J = 22.3$  Hz), 114.5, 112.0 (ddt,  $J = 257.1, 253.5, 38.9$  Hz), 55.5, 45.9, 40.9, 28.6, 18.3, 14.3 ppm.

<sup>19</sup>F NMR (282 MHz,  $\text{CDCl}_3$ )  $\delta$  -85.13 (t,  $J = 2.6$  Hz, 3F), -105.11 (dq,  $J = 271.9, 3.1$  Hz, 1F), -113.30 (dq,  $J = 271.7, 2.2$  Hz, 1F) ppm.

HRMS (ESI) calcd for  $[\text{C}_{19}\text{H}_{24}\text{F}_5\text{NO}_2\text{S} + \text{H}]^+$  426.1521, found 426.1524.

HPLC: Daicel Chiralpak IA-3, *n*-hexane/isopropanol 90/10, flow rate = 0.5 mL/min, uv-vis  $\lambda = 254$  nm,  $t_{R1} = 11.6$  min (minor),  $t_{R2} = 14.7$  min (major).

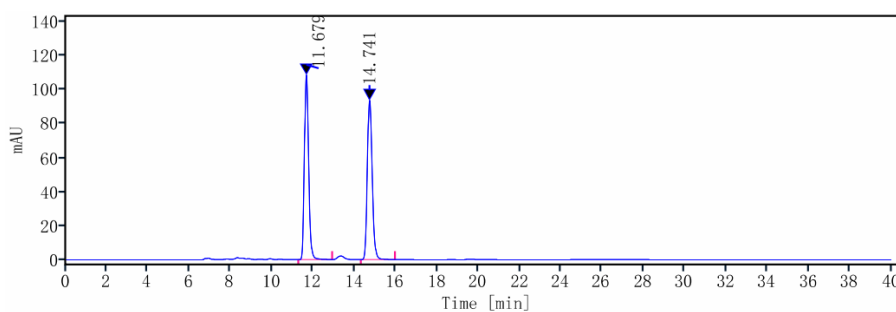

| RetTime [min] | Type | Width [min] | Area [mAU*s] | Height [mAU] | Area%   |
|---------------|------|-------------|--------------|--------------|---------|
| 11.679        | BB   | 1.6333      | 1554.4429    | 108.8643     | 50.1170 |
| 14.741        | BB   | 1.6567      | 1547.1856    | 93.9250      | 49.8830 |

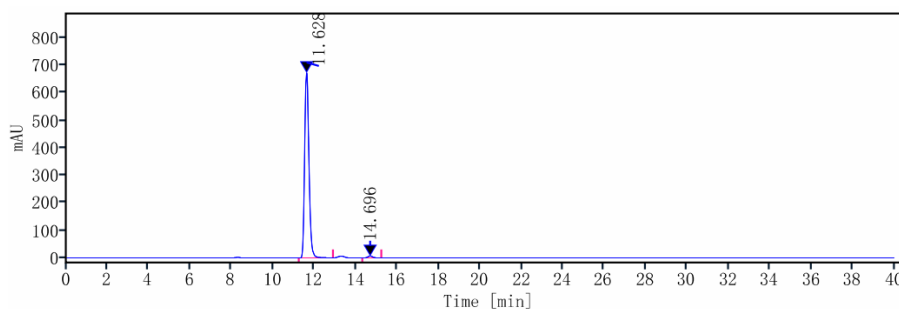

| RetTime [min] | Type | Width [min] | Area [mAU*s] | Height [mAU] | Area%   |
|---------------|------|-------------|--------------|--------------|---------|
| 11.628        | BV   | 1.6428      | 9588.7824    | 672.5602     | 98.8508 |
| 14.696        | BB   | 0.9200      | 111.4798     | 6.9155       | 1.1492  |

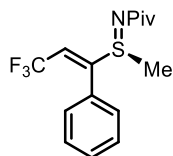

***N-((S)-methyl((E)-3,3,3-trifluoro-1-phenylprop-1-en-1-yl)-λ<sup>4</sup>-sulfaneylidene)pivalamide (4ae)***

21.8 mg, 70% yield, 95% ee, *E/Z* > 20/1, as a colorless oil.

$[\alpha]_{25}^D = +98.6$  ( $c = 0.074$ ,  $\text{CHCl}_3$ ).

<sup>1</sup>H NMR (300 MHz,  $\text{CDCl}_3$ )  $\delta$  7.51 – 7.44 (m, 3H), 7.42 – 7.38 (m, 2H), 6.48 (q,  $J = 7.5$  Hz, 1H), 2.49 (s, 3H), 1.28 (s, 9H) ppm.

<sup>13</sup>C NMR (75 MHz,  $\text{CDCl}_3$ )  $\delta$  191.2, 149.2 (q,  $^3J_{\text{C-F}} = 5.3$  Hz), 131.0, 129.5, 129.2, 128.8 (q,  $^4J_{\text{C-F}} = 1.6$  Hz), 122.0 (q,  $^1J_{\text{C-F}} = 270.7$  Hz), 121.2 (q,  $^2J_{\text{C-F}} = 36.1$  Hz), 40.3, 30.4, 28.6 ppm.

<sup>19</sup>F NMR (282 MHz,  $\text{CDCl}_3$ )  $\delta$  -57.10 ppm.

HRMS (ESI) calcd for  $[\text{C}_{15}\text{H}_{18}\text{F}_3\text{NOS} + \text{H}]^+$  318.1134, found 318.1135.

HPLC: Daicel Chiralpak IA-3, *n*-hexane/isopropanol 90/10, flow rate = 0.5 mL/min, uv-vis  $\lambda = 254$  nm,  $t_{\text{R}1} = 10.4$  min (minor),  $t_{\text{R}2} = 11.6$  min (major).

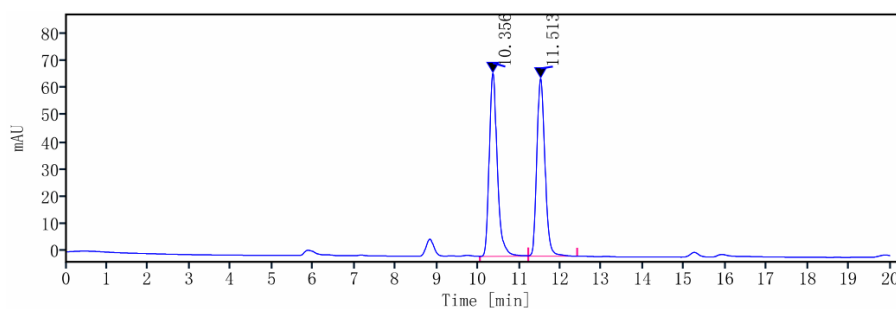

| RetTime [min] | Type | Width [min] | Area [mAU*s] | Height [mAU] | Area%   |
|---------------|------|-------------|--------------|--------------|---------|
| 10.356        | BV   | 1.1726      | 920.6461     | 67.2553      | 50.8847 |
| 11.513        | VB   | 1.1907      | 888.6316     | 65.2347      | 49.1153 |

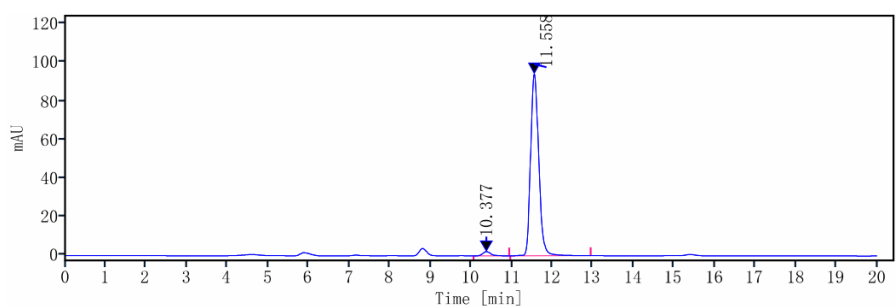

| RetTime [min] | Type | Width [min] | Area [mAU*s] | Height [mAU] | Area%   |
|---------------|------|-------------|--------------|--------------|---------|
| 10.377        | BB   | 0.8800      | 30.0090      | 2.1816       | 2.2440  |
| 11.558        | BB   | 1.9793      | 1307.3108    | 94.2613      | 97.7560 |

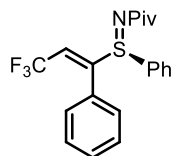

***N-((S)-phenyl((E)-3,3,3-trifluoro-1-phenylprop-1-en-1-yl)-λ<sup>4</sup>-sulfaneylidene)-pivalamide (4af)***

27.7 mg, 73% yield, 95% ee, *E/Z* > 20/1, colorless oil.

$[\alpha]_{25}^D = +98.6$  ( $c = 0.074$ ,  $\text{CHCl}_3$ ).

<sup>1</sup>H NMR (300 MHz,  $\text{CDCl}_3$ )  $\delta$  7.49 – 7.41 (m, 3H), 7.38 – 7.32 (m, 3H), 7.30 – 7.24 (m, 2H), 7.02 – 6.98 (m, 2H), 6.78 (q,  $J = 7.5$  Hz, 1H), 1.31 (s, 9H) ppm.

<sup>13</sup>C NMR (75 MHz,  $\text{CDCl}_3$ )  $\delta$  190.6, 150.2 (q,  $^3J_{\text{C-F}} = 5.3$  Hz), 132.6, 132.1, 130.4, 129.6, 129.4, 129.2 (q,  $^4J_{\text{C-F}} = 1.4$  Hz), 128.4, 122.0 (q,  $^1J_{\text{C-F}} = 270.9$  Hz), 120.7 (q,  $^2J_{\text{C-F}} = 36.0$  Hz), 40.6, 28.6 ppm.

<sup>19</sup>F NMR (282 MHz,  $\text{CDCl}_3$ )  $\delta$  -57.06 ppm.

HRMS (ESI) calcd for  $[\text{C}_{20}\text{H}_{20}\text{F}_3\text{NOS} + \text{H}]^+$  380.1290, found 380.1293.

HPLC: Daicel Chiralpak AD-H, *n*-hexane/isopropanol 90/10, flow rate = 0.5 mL/min, uv-vis  $\lambda = 254$  nm,  $t_{\text{R}1} = 11.8$  min (major),  $t_{\text{R}2} = 25.1$  min (minor).

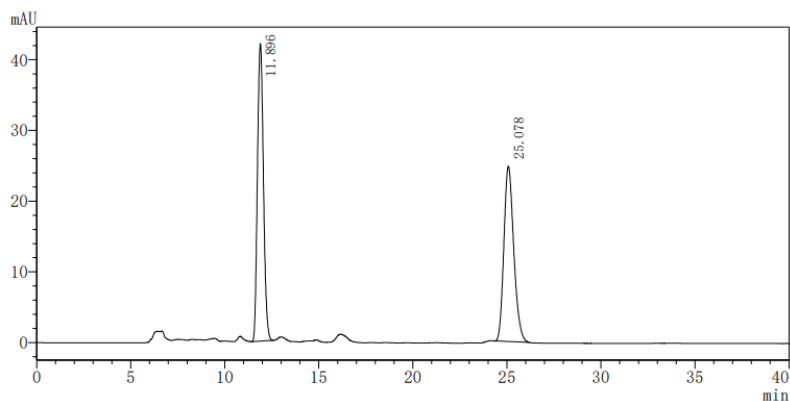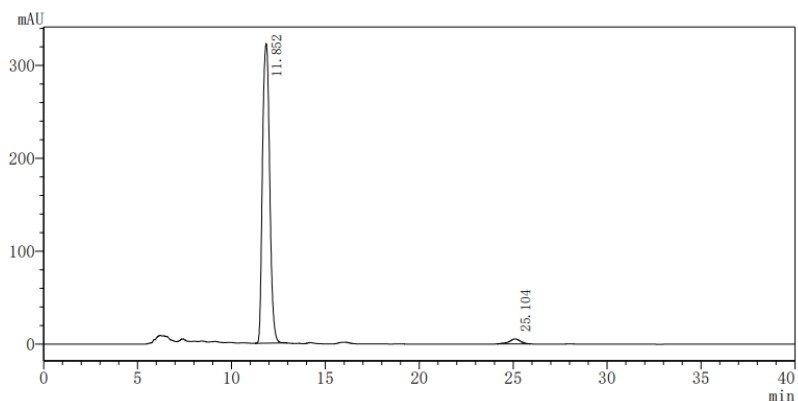

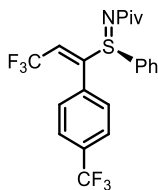

***N-((S)-phenyl((E)-3,3,3-trifluoro-1-(4-(trifluoromethyl)phenyl)prop-1-en-1-yl)-λ<sup>4</sup>-sulfaneylidene)pivalamide (4ag)***

28.6 mg, 64% yield, 95% ee, *E/Z* > 20/1, colorless oil.

$[\alpha]_{25}^D = +38.5$  ( $c = 0.078$ ,  $\text{CHCl}_3$ ).

<sup>1</sup>H NMR (300 MHz,  $\text{CDCl}_3$ )  $\delta$  7.56 – 7.39 (m, 7H), 7.09 – 7.07 (m, 2H), 6.82 (q,  $J = 7.3$  Hz, 1H), 1.30 (s, 9H) ppm.

<sup>13</sup>C NMR (75 MHz,  $\text{CDCl}_3$ )  $\delta$  191.0, 149.3 (q,  $^3J_{\text{C-F}} = 5.2$  Hz), 133.0, 132.4 (q,  $^2J_{\text{C-F}} = 32.8$  Hz), 131.3, 129.9, 129.7 (q,  $^4J_{\text{C-F}} = 1.6$  Hz), 128.5, 125.4 (q,  $^3J_{\text{C-F}} = 3.8$  Hz), 123.6 (q,  $^1J_{\text{C-F}} = 269.8$  Hz), 122.8 (q,  $^2J_{\text{C-F}} = 36.0$  Hz), 121.7 (q,  $^1J_{\text{C-F}} = 271.2$  Hz), 40.7, 28.6 ppm.

<sup>19</sup>F NMR (282 MHz,  $\text{CDCl}_3$ )  $\delta$  -57.25 (3F), -63.03 (3F) ppm.

HRMS (ESI) calcd for  $[\text{C}_{21}\text{H}_{19}\text{F}_6\text{NOS}+\text{H}]^+$  448.1164, found 448.1160.

HPLC: Daicel Chiralpak IA-3, *n*-hexane/isopropanol 80/20, flow rate = 0.5 mL/min, uv-vis  $\lambda = 280$  nm,  $t_{\text{R}1} = 8.3$  min (major),  $t_{\text{R}2} = 13.0$  min (minor).

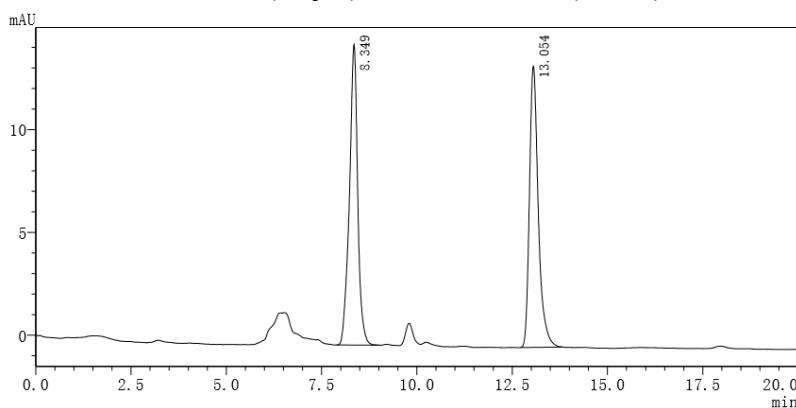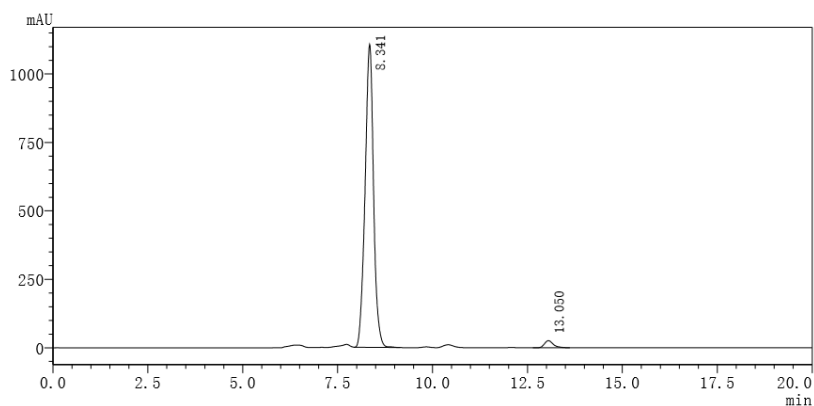

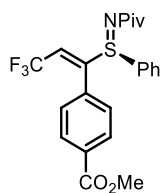

**Methyl 4-((*S*)-3,3,3-trifluoro-1-((*E*)-*S*-phenyl-*N*-pivaloylsulfinimidoyl)prop-1-en-1-yl)benzoate (4ah)**

31.2 mg, 71% yield, 96% ee, *E/Z* > 20/1, yellow oil.

$[\alpha]_{25}^D = +14.5$  ( $c = 0.062$ ,  $\text{CHCl}_3$ ).

$^1\text{H NMR}$  (300 MHz,  $\text{CDCl}_3$ )  $\delta$  7.95 (d,  $J = 8.4$  Hz, 2H), 7.53 – 7.35 (m, 5H), 7.05 (d,  $J = 8.4$  Hz, 2H), 6.80 (q,  $J = 7.3$  Hz, 1H), 3.92 (s, 3H), 1.30 (s, 9H) ppm.

$^{13}\text{C NMR}$  (75 MHz,  $\text{CDCl}_3$ )  $\delta$  190.9, 166.2, 149.6 (q,  $^3J_{\text{C-F}} = 5.2$  Hz), 133.8, 132.9, 131.8, 131.5, 129.8, 129.5, 129.4 (q,  $^4J_{\text{C-F}} = 1.6$  Hz), 128.5, 121.81 (q,  $^1J_{\text{C-F}} = 271.1$  Hz), 121.80 (q,  $^2J_{\text{C-F}} = 36.0$  Hz), 52.5, 40.7, 28.6 ppm.

$^{19}\text{F NMR}$  (282 MHz,  $\text{CDCl}_3$ )  $\delta$  -57.23 ppm.

**HRMS** (ESI) calcd for  $[\text{C}_{22}\text{H}_{22}\text{F}_3\text{NO}_3\text{S} + \text{H}]^+$  438.1345, found 438.1346.

**HPLC**: Daicel Chiralpak IA-3, *n*-hexane/isopropanol 80/20, flow rate = 0.5 mL/min, uv-vis  $\lambda = 280$  nm,  $t_{\text{R1}} = 10.2$  min (major),  $t_{\text{R2}} = 19.8$  min (minor).

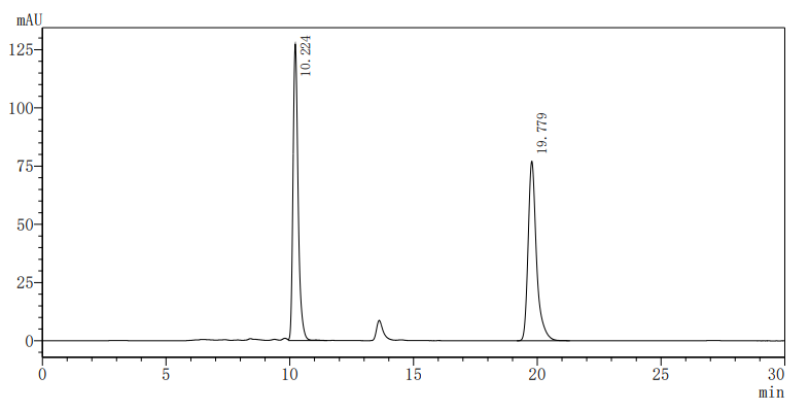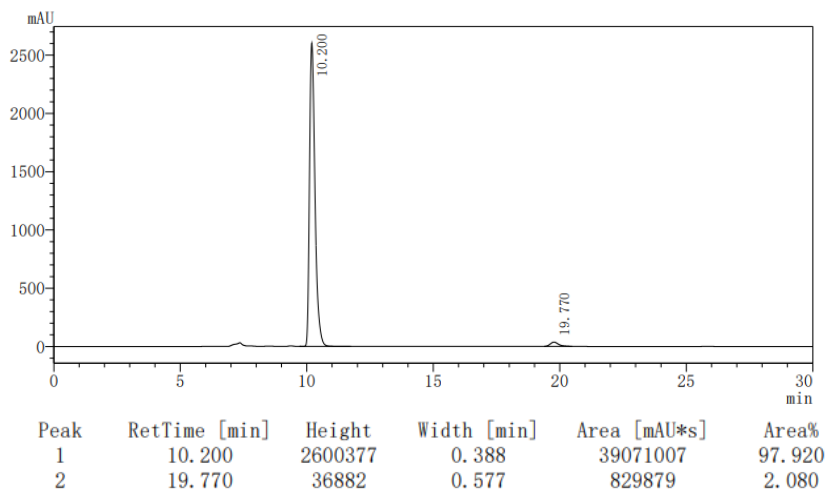

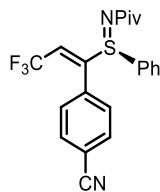

***N-((S)-((E)-1-(4-cyanophenyl)-3,3,3-trifluoroprop-1-en-1-yl)(phenyl)-λ<sup>4</sup>-sulfaneylidene)pivalamide (4ai)***

30.7 mg, 76% yield, 96% ee, *E/Z* > 20/1, yellow oil.

$[\alpha]_{25}^D = +14.5$  ( $c = 0.062$ ,  $\text{CHCl}_3$ ).

<sup>1</sup>H NMR (300 MHz,  $\text{CDCl}_3$ )  $\delta$  7.60 – 7.40 (m, 7H), 7.07 – 7.04 (m, 2H), 6.82 (q,  $J = 7.2$  Hz, 1H), 1.29 (s, 9H) ppm.

<sup>13</sup>C NMR (75 MHz,  $\text{CDCl}_3$ )  $\delta$  191.0, 149.1 (q,  $^3J_{\text{C-F}} = 5.1$  Hz), 133.8, 133.1, 132.0, 131.0, 130.0, 128.5, 122.8 (q,  $^2J_{\text{C-F}} = 36.1$  Hz), 121.6 (q,  $^1J_{\text{C-F}} = 271.3$  Hz), 117.8, 114.3, 40.7, 28.6 ppm.

<sup>19</sup>F NMR (282 MHz,  $\text{CDCl}_3$ )  $\delta$  -57.31 ppm.

HRMS (ESI) calcd for  $[\text{C}_{21}\text{H}_{19}\text{F}_3\text{N}_2\text{OS} + \text{H}]^+$  405.1243, found 405.1244.

HPLC: Daicel Chiralpak IA-3, *n*-hexane/isopropanol 70/30, flow rate = 0.5 mL/min, uv-vis  $\lambda = 280$  nm,  $t_{\text{R}1} = 10.6$  min (major),  $t_{\text{R}2} = 18.2$  min (minor).

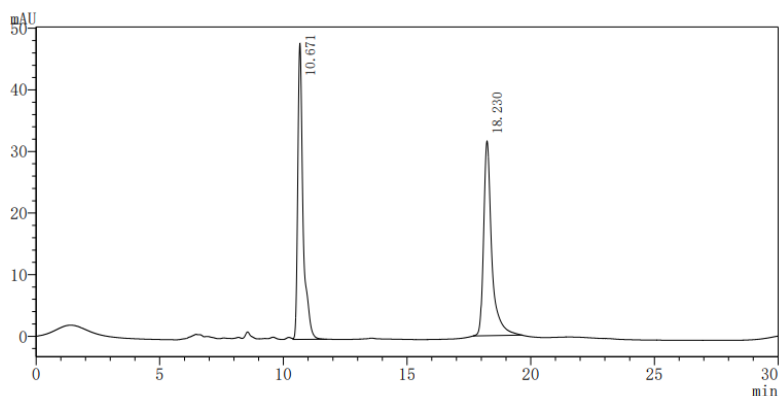

检测器A Ch1 280nm

| Peak | RetTime [min] | Height | Width [min] | Area [mAU*s] | Area%  |
|------|---------------|--------|-------------|--------------|--------|
| 1    | 10.671        | 48027  | 0.349       | 715178       | 49.907 |
| 2    | 18.230        | 31596  | 0.532       | 717839       | 50.093 |

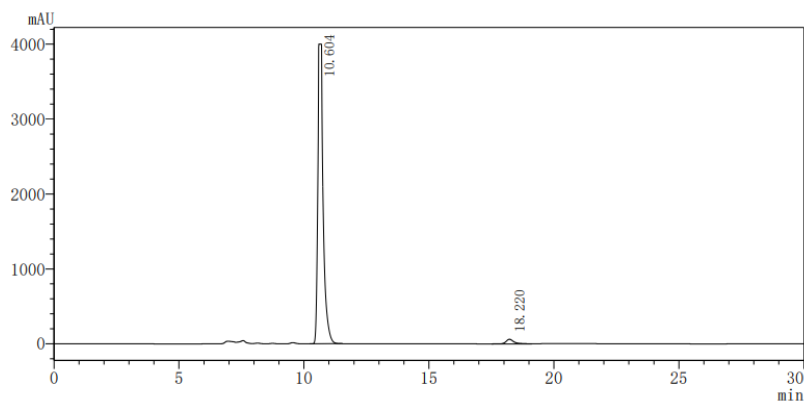

检测器A Ch1 280nm

| Peak | RetTime [min] | Height  | Width [min] | Area [mAU*s] | Area%  |
|------|---------------|---------|-------------|--------------|--------|
| 1    | 10.604        | 3999224 | 0.306       | 60009509     | 97.767 |
| 2    | 18.220        | 61237   | 0.533       | 1370480      | 2.233  |

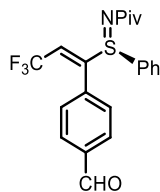

***N-((S)-phenyl((E)-3,3,3-trifluoro-1-(4-formylphenyl)prop-1-en-1-yl)-λ<sup>4</sup>-sulfaneylidene)pivalamide (4aj)***

31.8 mg, 78% yield, 93% ee, *E/Z* > 20/1, yellow oil.

$[\alpha]_{25}^D = +17.1$  ( $c = 0.07$ ,  $\text{CHCl}_3$ ).

<sup>1</sup>H NMR (300 MHz,  $\text{CDCl}_3$ )  $\delta$  10.01 (s, 1H), 7.81 – 7.78 (m, 2H), 7.55 – 7.37 (m, 5H), 7.15 – 7.13 (m, 2H), 6.82 (q,  $J = 7.3$  Hz, 1H), 1.31 (s, 9H) ppm.

<sup>13</sup>C NMR (75 MHz,  $\text{CDCl}_3$ )  $\delta$  191.4, 191.0, 149.5 (q,  $^3J_{\text{C-F}} = 5.0$  Hz), 137.2, 135.2, 133.0, 131.3, 130.0 (q,  $^4J_{\text{C-F}} = 1.6$  Hz), 129.9, 129.4, 128.5, 122.2 (q,  $^2J_{\text{C-F}} = 36.1$  Hz), 121.7 (q,  $^1J_{\text{C-F}} = 271.2$  Hz), 40.7, 28.6 ppm.

<sup>19</sup>F NMR (282 MHz,  $\text{CDCl}_3$ )  $\delta$  -57.25 ppm.

HRMS (ESI) calcd for  $[\text{C}_{21}\text{H}_{20}\text{F}_3\text{NO}_2\text{S} + \text{H}]^+$  408.1240, found 408.1236.

HPLC: Daicel Chiralpak IA-3, *n*-hexane/isopropanol 70/30, flow rate = 0.5 mL/min, uv-vis  $\lambda = 280$  nm,  $t_{\text{R1}} = 10.2$  min (major),  $t_{\text{R2}} = 17.0$  min (minor).

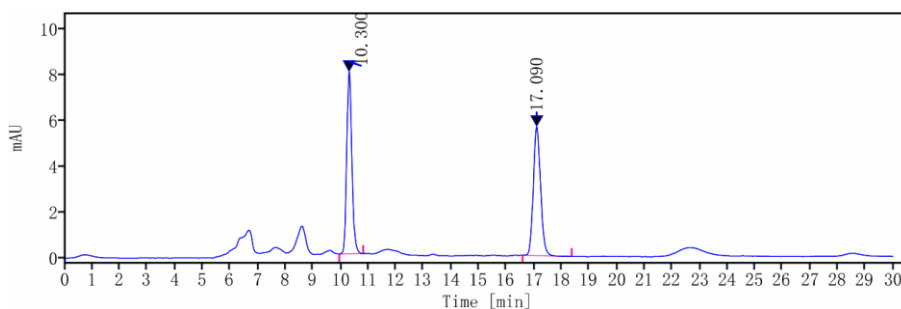

| RetTime [min] | Type | Width [min] | Area [mAU*s] | Height [mAU] | Area%   |
|---------------|------|-------------|--------------|--------------|---------|
| 10.300        | BB   | 0.8633      | 103.0814     | 7.9473       | 49.9748 |
| 17.090        | BB   | 1.7733      | 103.1854     | 5.6283       | 50.0252 |

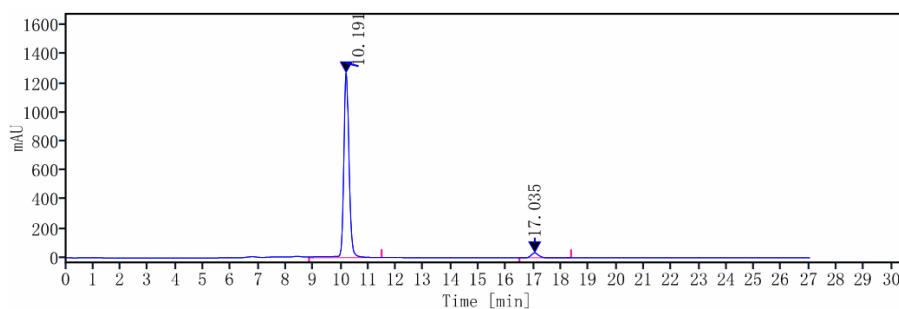

| RetTime [min] | Type | Width [min] | Area [mAU*s] | Height [mAU] | Area%   |
|---------------|------|-------------|--------------|--------------|---------|
| 10.191        | BB   | 2.5200      | 7154.9334    | 546.3278     | 96.2867 |
| 17.035        | BB   | 1.9067      | 275.9292     | 14.7783      | 3.7133  |

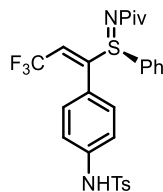

***N-((S)-phenyl((E)-3,3,3-trifluoro-1-(4-((4-methylphenyl)sulfonamido)phenyl)prop-1-en-1-yl)- $\lambda^4$ -sulfanylidene)pivalamide (4ak)***

36.2 mg, 66% yield, 95% ee, *E/Z* > 20/1, yellow oil.

$[\alpha]_{25}^D = +38.9$  ( $c = 0.072$ ,  $\text{CHCl}_3$ ).

$^1\text{H NMR}$  (300 MHz,  $\text{CDCl}_3$ )  $\delta$  8.08 (s, 1H), 7.73 – 7.60 (m, 2H), 7.50 – 7.40 (m, 1H), 7.37 – 7.17 (m, 6H), 7.11 – 7.02 (m, 2H), 6.88 – 6.79 (m, 2H), 6.73 (q,  $J = 7.4$  Hz, 1H), 2.38 (s, 3H), 1.29 (s, 9H) ppm.

$^{13}\text{C NMR}$  (75 MHz,  $\text{CDCl}_3$ )  $\delta$  190.9, 149.5 (q,  $^3J_{\text{C-F}} = 5.2$  Hz), 144.2, 139.5, 136.0, 132.7, 131.9, 130.3 (q,  $^4J_{\text{C-F}} = 1.4$  Hz), 129.7, 129.6, 128.3, 127.3, 125.1, 122.0 (q,  $^1J_{\text{C-F}} = 271.0$  Hz), 120.9 (q,  $^2J_{\text{C-F}} = 36.0$  Hz), 120.2, 40.7, 28.6, 21.6 ppm.

$^{19}\text{F NMR}$  (282 MHz,  $\text{CDCl}_3$ )  $\delta$  -57.16 ppm.

**HRMS** (ESI) calcd for  $[\text{C}_{27}\text{H}_{27}\text{F}_3\text{N}_2\text{O}_3\text{S}_2 + \text{H}]^+$  548.1415, found 549.1504.

**HPLC**: Daicel Chiralpak IA-3, *n*-hexane/isopropanol 70/30, flow rate = 0.5 mL/min, uv-vis  $\lambda = 280$  nm,  $t_{\text{R}1} = 11.7$  min (major),  $t_{\text{R}2} = 19.3$  min (minor).

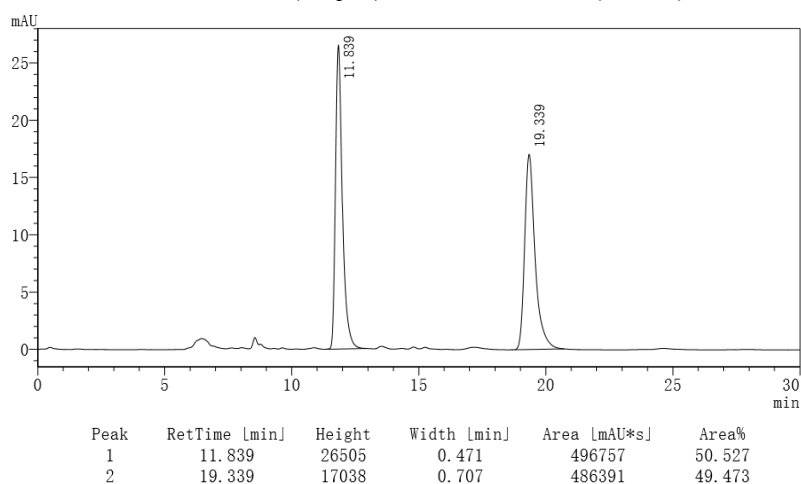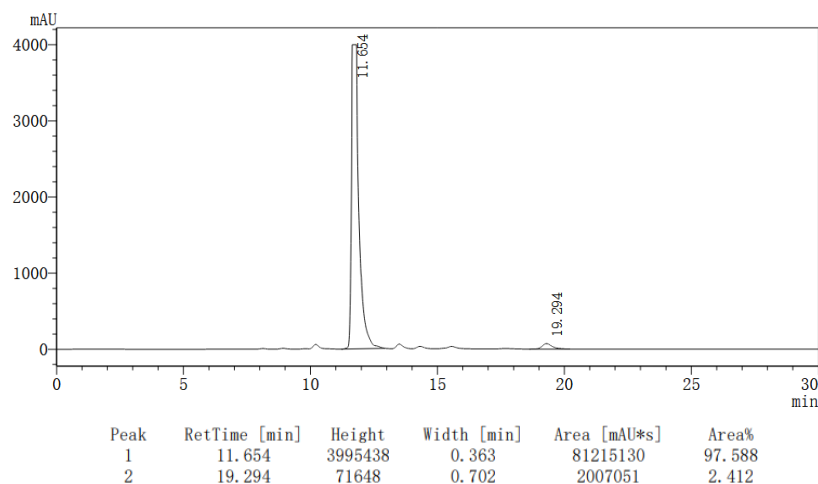

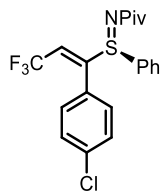

***N-((S)-((E)-1-(4-chlorophenyl)-3,3,3-trifluoroprop-1-en-1-yl)(phenyl)-λ<sup>4</sup>-sulfaneylidene)pivalamide (4a)***

26.5 mg, 64% yield, 95% ee, *E/Z* > 20/1, yellow oil.

$[\alpha]_{25}^D = +42.2$  ( $c = 0.064$ ,  $\text{CHCl}_3$ ).

<sup>1</sup>H NMR (300 MHz,  $\text{CDCl}_3$ )  $\delta$  7.54 – 7.37 (m, 5H), 7.29 – 7.25 (m, 2H), 6.94 – 6.89 (m, 2H), 6.78 (q,  $J = 7.4$  Hz, 1H), 1.30 (s, 9H) ppm.

<sup>13</sup>C NMR (75 MHz,  $\text{CDCl}_3$ )  $\delta$  190.8, 149.5 (q,  $^3J_{\text{C-F}} = 5.2$  Hz), 136.9, 132.8, 131.7, 130.6 (q,  $^4J_{\text{C-F}} = 1.5$  Hz), 129.8, 128.8, 128.5, 127.8, 121.9 (q,  $^1J_{\text{C-F}} = 271.1$  Hz), 121.6 (q,  $^2J_{\text{C-F}} = 36.1$  Hz), 40.7, 28.6 ppm.

<sup>19</sup>F NMR (282 MHz,  $\text{CDCl}_3$ )  $\delta$  -57.17 ppm.

HRMS (ESI) calcd for  $[\text{C}_{20}\text{H}_{19}\text{ClF}_3\text{NOS} + \text{H}]^+$  414.0901, found 414.0901.

HPLC: Daicel Chiralpak IA-3, *n*-hexane/isopropanol 80/20, flow rate = 0.5 mL/min, uv-vis  $\lambda = 280$  nm,  $t_{\text{R}1} = 9.5$  min (major),  $t_{\text{R}2} = 17.6$  min (minor).

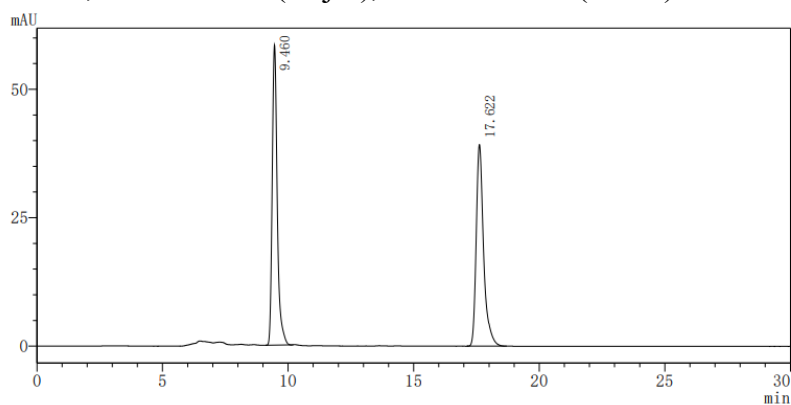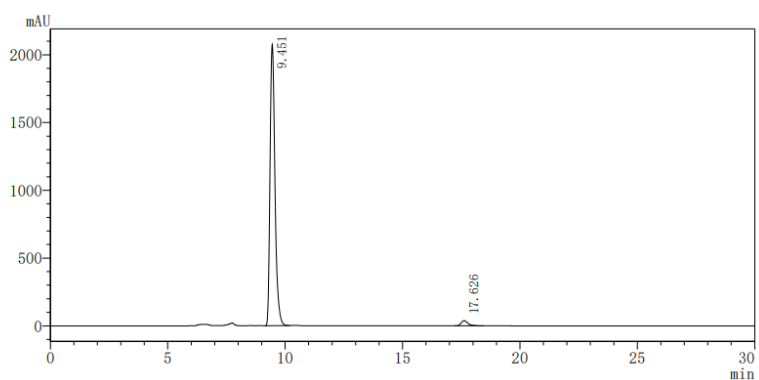

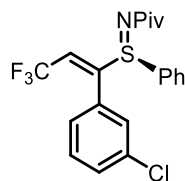

***N-((S)-((E)-1-(3-chlorophenyl)-3,3,3-trifluoroprop-1-en-1-yl)(phenyl)-λ<sup>4</sup>-sulfaneylidene)pivalamide (4am)***

28.1 mg, 68% yield, 95% ee, *E/Z* > 20/1, yellow oil.

$[\alpha]_{25}^D = +13.3$  ( $c = 0.06$ ,  $\text{CHCl}_3$ ).

<sup>1</sup>H NMR (300 MHz,  $\text{CDCl}_3$ )  $\delta$  7.55 – 7.34 (m, 6H), 7.24 – 7.18 (m, 1H), 6.96 – 6.95 (m, 1H), 6.84 – 6.75 (m, 2H), 1.30 (s, 9H) ppm.

<sup>13</sup>C NMR (75 MHz,  $\text{CDCl}_3$ )  $\delta$  190.9, 149.2 (q, <sup>3</sup> $J_{\text{C-F}} = 5.2$  Hz), 134.5, 132.9, 131.5, 130.8, 130.6, 129.8, 129.7, 129.2 (q, <sup>4</sup> $J_{\text{C-F}} = 1.7$  Hz), 128.5, 127.4 (q, <sup>4</sup> $J_{\text{C-F}} = 1.6$  Hz), 122.0 (q, <sup>2</sup> $J_{\text{C-F}} = 36.0$  Hz), 121.8 (q, <sup>1</sup> $J_{\text{C-F}} = 271.1$  Hz), 40.7, 28.6 ppm.

<sup>19</sup>F NMR (282 MHz,  $\text{CDCl}_3$ )  $\delta$  -57.27 ppm.

HRMS (ESI) calcd for  $[\text{C}_{20}\text{H}_{19}\text{ClF}_3\text{NOS} + \text{H}]^+$  414.0901, found 414.0905.

HPLC: Daicel Chiralpak IA-3, *n*-hexane/isopropanol 80/20, flow rate = 0.5 mL/min, uv-vis  $\lambda = 280$  nm,  $t_{\text{R}1} = 9.0$  min (major),  $t_{\text{R}2} = 14.9$  min (minor).

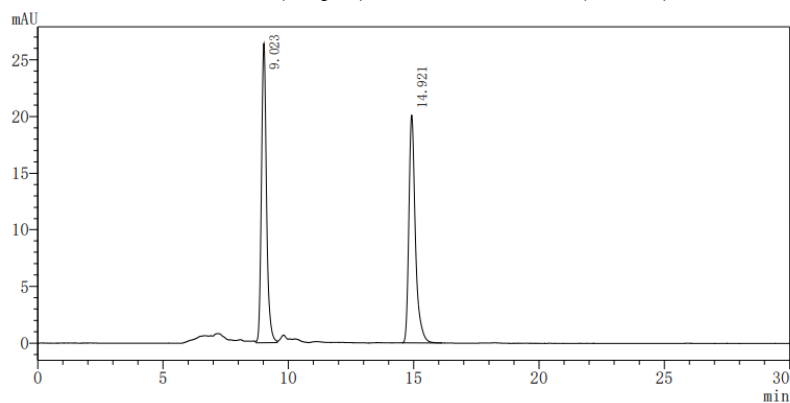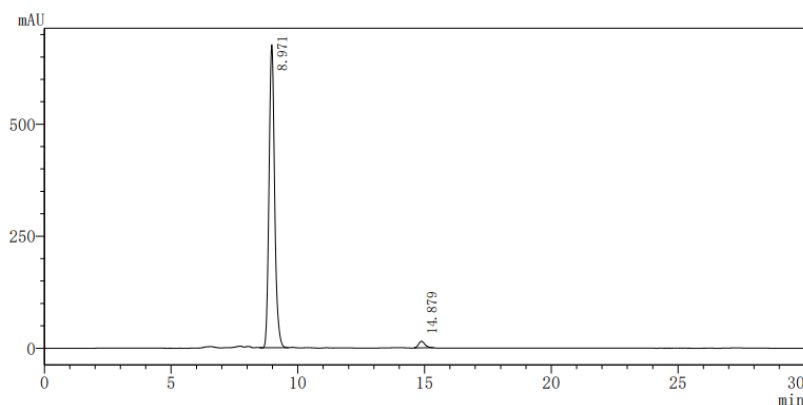

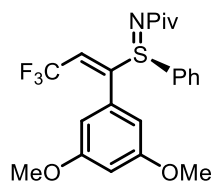

***N-((S)-((E)-1-(3,5-dimethoxyphenyl)-3,3,3-trifluoroprop-1-en-1-yl)(phenyl)- $\lambda^4$ -sulfaneylidene)pivalamide (4an)***

25 mg, 57% yield, 95% ee, *E/Z* > 20/1, yellow oil.

$[\alpha]_{25}^D = +75.0$  ( $c = 0.084$ ,  $\text{CHCl}_3$ ).

$^1\text{H NMR}$  (300 MHz,  $\text{CDCl}_3$ )  $\delta$  7.54 – 7.46 (m, 3H), 7.44 – 7.35 (m, 2H), 6.73 (q,  $J = 7.5$  Hz, 1H), 6.52 – 6.40 (m, 1H), 6.22 – 6.08 (m, 2H), 3.67 (s, 6H), 1.31 (s, 9H) ppm.

$^{13}\text{C NMR}$  (75 MHz,  $\text{CDCl}_3$ )  $\delta$  190.7, 160.6, 149.9 (q,  $^3J_{\text{C-F}} = 5.2$  Hz), 132.6, 132.3, 131.1, 129.6, 128.6, 122.1 (q,  $^1J_{\text{C-F}} = 271.1$  Hz), 120.5 (q,  $^2J_{\text{C-F}} = 36.0$  Hz), 107.1 (q,  $^4J_{\text{C-F}} = 1.8$  Hz), 102.9, 55.6, 40.7, 28.7 ppm.

$^{19}\text{F NMR}$  (282 MHz,  $\text{CDCl}_3$ )  $\delta$  -57.17 ppm.

**HRMS** (ESI) calcd for  $[\text{C}_{22}\text{H}_{24}\text{F}_3\text{NO}_3\text{S} + \text{H}]^+$  420.1502, found 420.1507.

**HPLC**: Daicel Chiralpak IA-3, *n*-hexane/isopropanol 80/20, flow rate = 0.5 mL/min, uv-vis  $\lambda = 280$  nm,  $t_{\text{R}1} = 8.7$  min (major),  $t_{\text{R}2} = 12.8$  min (minor).

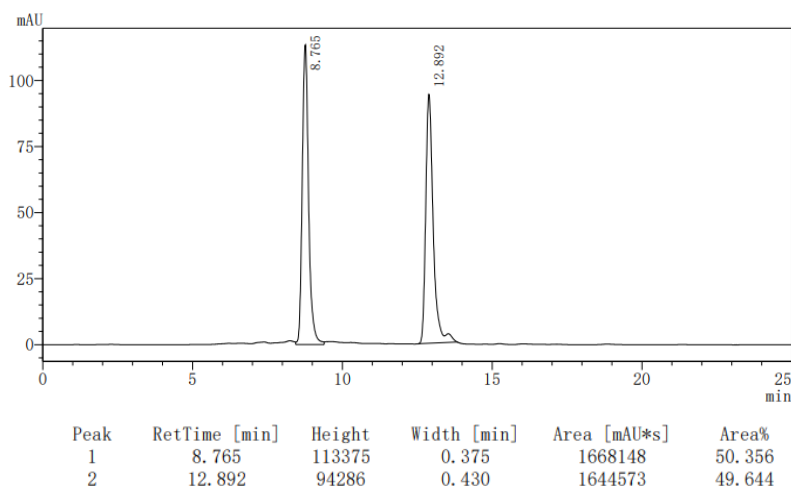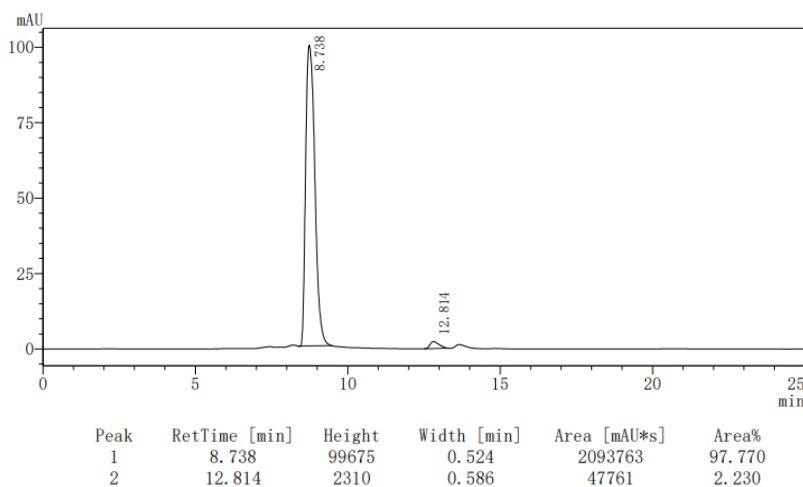

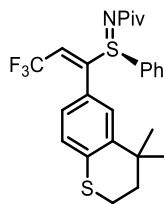

***N-((S)-((E)-1-(4,4-dimethylthiochroman-6-yl)-3,3,3-trifluoroprop-1-en-1-yl)(phenyl)-λ<sup>4</sup>-sulfaneylidene)pivalamide (4ao)***

36.9 mg, 77% yield, 95% ee, *E/Z* > 20/1, yellow oil.

$[\alpha]_{25}^D = +8.1$  ( $c = 0.062$ ,  $\text{CHCl}_3$ ).

<sup>1</sup>H NMR (300 MHz,  $\text{CDCl}_3$ )  $\delta$  7.49 – 7.34 (m, 5H), 7.01 – 6.98 (m, 1H), 6.86 – 6.85 (m, 1H), 6.76 – 6.69 (m, 2H), 3.02 – 2.98 (m, 2H), 1.92 – 1.88 (m, 2H), 1.31 (s, 9H), 1.20 (s, 3H), 1.07 (s, 3H) ppm.

<sup>13</sup>C NMR (75 MHz,  $\text{CDCl}_3$ )  $\delta$  190.6, 150.2 (q,  $^3J_{\text{C-F}} = 5.3$  Hz), 142.2, 135.8, 132.6, 132.4, 129.6, 128.5, 127.6 (q,  $^4J_{\text{C-F}} = 1.4$  Hz), 126.6, 126.35, 126.33, 124.8, 122.2 (q,  $^1J_{\text{C-F}} = 270.9$  Hz), 120.2 (q,  $^2J_{\text{C-F}} = 35.7$  Hz), 40.7, 37.1, 33.0, 30.1, 30.0, 28.7, 23.2 ppm.

<sup>19</sup>F NMR (282 MHz,  $\text{CDCl}_3$ )  $\delta$  -56.89 ppm.

HRMS (ESI) calcd for  $[\text{C}_{25}\text{H}_{28}\text{F}_3\text{NOS}_2 + \text{H}]^+$  480.1637, found 480.1633.

HPLC: Daicel Chiralpak IA-3, *n*-hexane/isopropanol 90/10, flow rate = 0.5 mL/min, uv-vis  $\lambda = 254$  nm,  $t_{\text{R}1} = 14.1$  min (major),  $t_{\text{R}2} = 30.1$  min (minor).

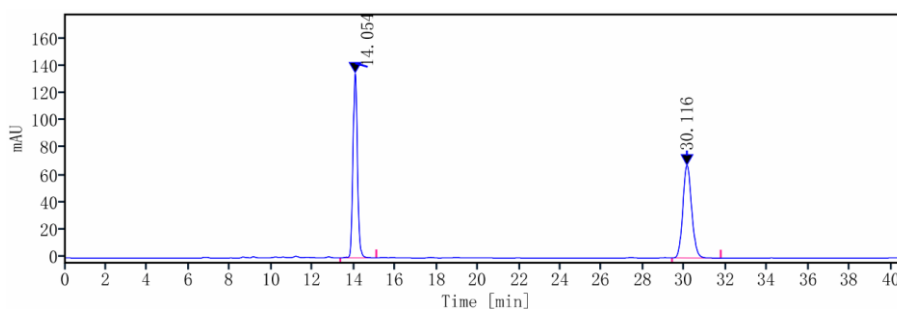

| RetTime [min] | Type | Width [min] | Area [mAU*s] | Height [mAU] | Area%   |
|---------------|------|-------------|--------------|--------------|---------|
| 14.054        | BB   | 1.7433      | 2034.9585    | 135.4613     | 50.1925 |
| 30.116        | BB   | 2.3533      | 2019.3502    | 67.7866      | 49.8075 |

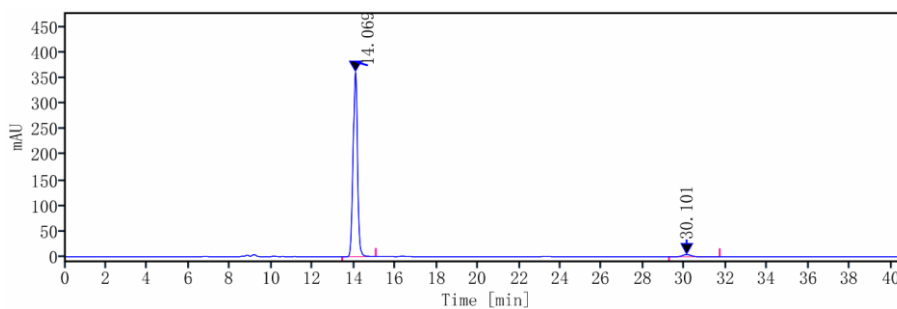

| RetTime [min] | Type | Width [min] | Area [mAU*s] | Height [mAU] | Area%   |
|---------------|------|-------------|--------------|--------------|---------|
| 14.069        | BB   | 1.6247      | 5377.3887    | 362.0443     | 97.5787 |
| 30.101        | BB   | 2.4533      | 133.4338     | 4.4292       | 2.4213  |

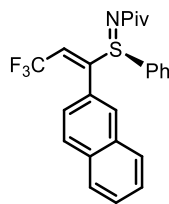

***N-((S)-phenyl((E)-3,3,3-trifluoro-1-(naphthalen-2-yl)prop-1-en-1-yl)-λ<sup>4</sup>-sulfaneylidene)pivalamide (4ap)***

32.1 mg, 75% yield, 92% ee, *E/Z* > 20/1, yellow oil.

$[\alpha]_{25}^D = +45.9$  ( $c = 0.074$ ,  $\text{CHCl}_3$ ).

<sup>1</sup>H NMR (400 MHz,  $\text{CDCl}_3$ )  $\delta$  7.84 – 7.79 (m, 1H), 7.77 – 7.71 (m, 2H), 7.59 – 7.50 (m, 3H), 7.47 – 7.43 (m, 3H), 7.34 – 7.30 (m, 2H), 7.02 – 7.00 (m, 1H), 6.83 (q,  $J = 7.4$  Hz, 1H), 1.33 (s, 9H) ppm.

<sup>13</sup>C NMR (101 MHz,  $\text{CDCl}_3$ )  $\delta$  190.8, 150.4 (q,  $^3J_{\text{C-F}} = 5.2$  Hz), 133.7, 132.6, 132.4, 132.0, 129.7, 129.5, 128.6, 128.5, 128.3, 127.9, 127.8, 127.1, 126.8, 125.9 (q,  $^4J_{\text{C-F}} = 1.7$  Hz), 122.1 (q,  $^1J_{\text{C-F}} = 273.6$  Hz), 120.8 (q,  $^2J_{\text{C-F}} = 36.4$  Hz), 40.7, 28.7 ppm.

<sup>19</sup>F NMR (376 MHz,  $\text{CDCl}_3$ )  $\delta$  -57.07 ppm.

HRMS (ESI) calcd for  $[\text{C}_{24}\text{H}_{22}\text{F}_3\text{NOS} + \text{H}]^+$  430.1447, found 430.1447.

HPLC: Daicel Chiralpak IA-3, *n*-hexane/isopropanol 80/20, flow rate = 0.5 mL/min, uv-vis  $\lambda = 254$  nm,  $t_{\text{R}1} = 9.1$  min (major),  $t_{\text{R}2} = 14.9$  min (minor).

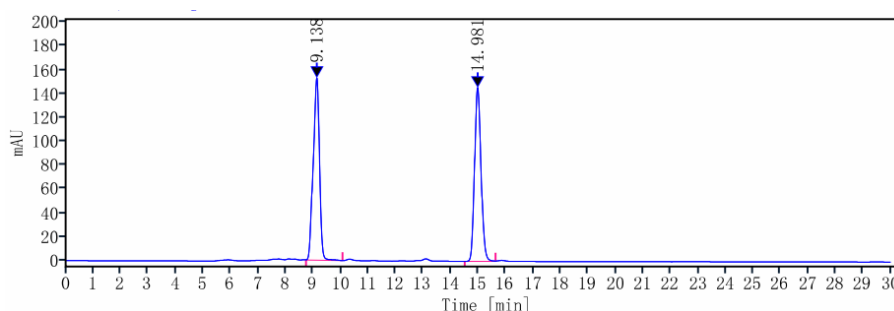

| RetTime [min] | Type | Width [min] | Area [mAU*s] | Height [mAU] | Area%   |
|---------------|------|-------------|--------------|--------------|---------|
| 9.138         | VB   | 1.3364      | 2408.5512    | 153.0464     | 50.1479 |
| 14.981        | BV   | 1.1167      | 2394.3485    | 145.8381     | 49.8521 |

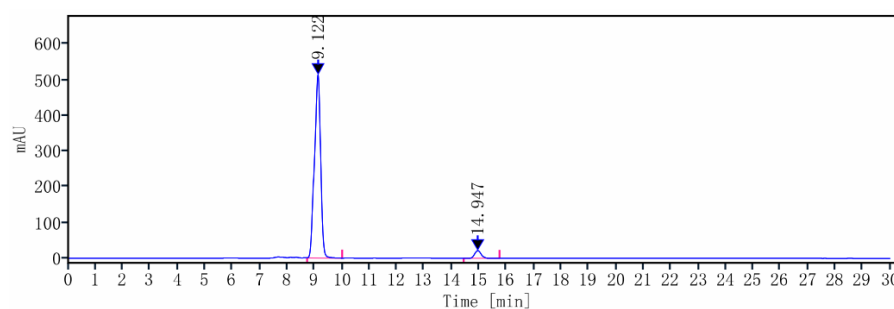

| RetTime [min] | Type | Width [min] | Area [mAU*s] | Height [mAU] | Area%   |
|---------------|------|-------------|--------------|--------------|---------|
| 9.122         | VB   | 1.2807      | 8015.8144    | 514.5143     | 95.7276 |
| 14.947        | BB   | 1.3067      | 357.7541     | 21.8099      | 4.2724  |

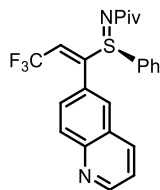

***N-((S)-phenyl((E)-3,3,3-trifluoro-1-(quinolin-6-yl)prop-1-en-1-yl)-λ<sup>4</sup>-sulfaneylidene)pivalamide (4aq)***

30.5 mg, 71% yield, 94% ee, *E/Z* > 20/1, yellow oil.

$[\alpha]_{25}^D = +7.8$  ( $c = 0.064$ ,  $\text{CHCl}_3$ ).

<sup>1</sup>H NMR (300 MHz,  $\text{CDCl}_3$ )  $\delta$  8.98 (dd,  $J = 4.2, 1.7$  Hz, 1H), 8.11 – 8.07 (m, 1H), 7.98 (d,  $J = 8.7$  Hz, 1H), 7.61 (d,  $J = 2.0$  Hz, 1H), 7.52 – 7.44 (m, 4H), 7.38 – 7.32 (m, 2H), 7.17 (dd,  $J = 8.7, 2.0$  Hz, 1H), 6.85 (q,  $J = 7.4$  Hz, 1H), 1.32 (s, 9H) ppm.

<sup>13</sup>C NMR (75 MHz,  $\text{CDCl}_3$ )  $\delta$  190.9, 152.2, 150.0 (q,  $^3J_{\text{C-F}} = 5.2$  Hz), 148.4, 136.6, 132.8, 131.7, 129.9, 129.8, 129.6 (q,  $^4J_{\text{C-F}} = 1.4$  Hz), 129.42, 129.40, 128.6, 127.7, 127.5, 122.3, 122.0 (q,  $^1J_{\text{C-F}} = 271.2$  Hz), 121.7 (q,  $^2J_{\text{C-F}} = 35.9$  Hz), 40.7, 28.7 ppm.

<sup>19</sup>F NMR (282 MHz,  $\text{CDCl}_3$ )  $\delta$  -57.18 ppm.

HRMS (ESI) calcd for  $[\text{C}_{23}\text{H}_{21}\text{F}_3\text{N}_2\text{OS} + \text{H}]^+$  431.1399, found 431.1403.

HPLC: Daicel Chiralpak IA-3, *n*-hexane/isopropanol 70/30, flow rate = 0.5 mL/min, uv-vis  $\lambda = 254$  nm,  $t_{\text{R}1} = 11.2$  min (major),  $t_{\text{R}2} = 21.3$  min (minor).

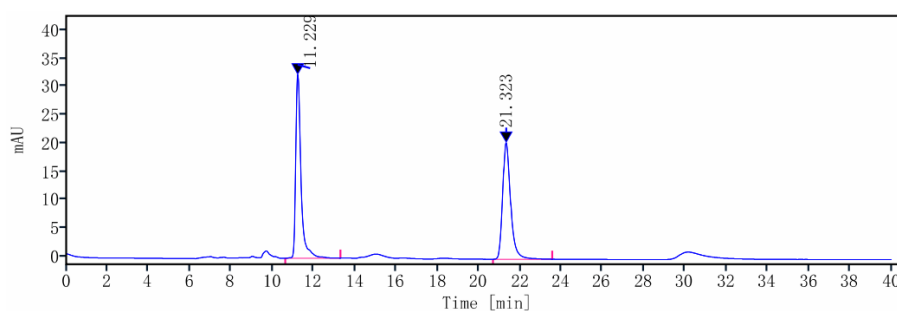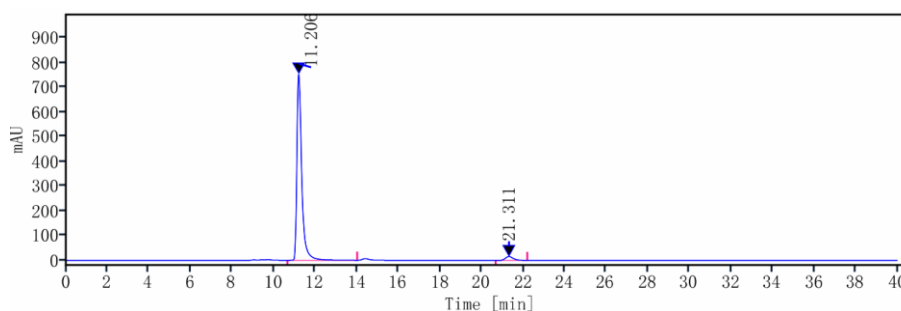

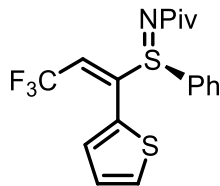

***N-((S)-phenyl((E)-3,3,3-trifluoro-1-(thiophen-2-yl)prop-1-en-1-yl)-λ<sup>4</sup>-sulfaneylidene)pivalamide (4ar)***

30.1mg, 78% yield, 95% ee, *E/Z* > 20/1, yellow oil.

$[\alpha]_{25}^D = +87.1$  ( $c = 0.062$ ,  $\text{CHCl}_3$ ).

<sup>1</sup>H NMR (300 MHz,  $\text{CDCl}_3$ )  $\delta$  7.55 – 7.51 (m, 4H), 7.42 – 7.35 (m, 2H), 7.01 – 6.97 (m, 2H), 6.83 (q,  $J = 7.5$  Hz, 1H), 1.30 (s, 9H) ppm.

<sup>13</sup>C NMR (75 MHz,  $\text{CDCl}_3$ )  $\delta$  190.5, 144.0 (q,  $^3J_{\text{C-F}} = 5.2$  Hz), 132.7, 132.6, 131.4 (q,  $^4J_{\text{C-F}} = 1.7$  Hz), 130.5, 129.6, 128.8, 128.2, 127.6, 121.9 (q,  $^1J_{\text{C-F}} = 270.8$  Hz), 121.5 (q,  $^2J_{\text{C-F}} = 36.4$  Hz), 40.6, 28.5 ppm.

<sup>19</sup>F NMR (282 MHz,  $\text{CDCl}_3$ )  $\delta$  -57.19 ppm.

HRMS (ESI) calcd for  $[\text{C}_{18}\text{H}_{18}\text{F}_3\text{NO}_2\text{S}_2 + \text{H}]^+$  402.0804, found 402.0809.

HPLC: Daicel Chiralpak IA-3, *n*-hexane/isopropanol 80/20, flow rate = 0.5 mL/min, uv-vis  $\lambda = 280$  nm,  $t_{R1} = 9.6$  min (major),  $t_{R2} = 14.9$  min (minor).

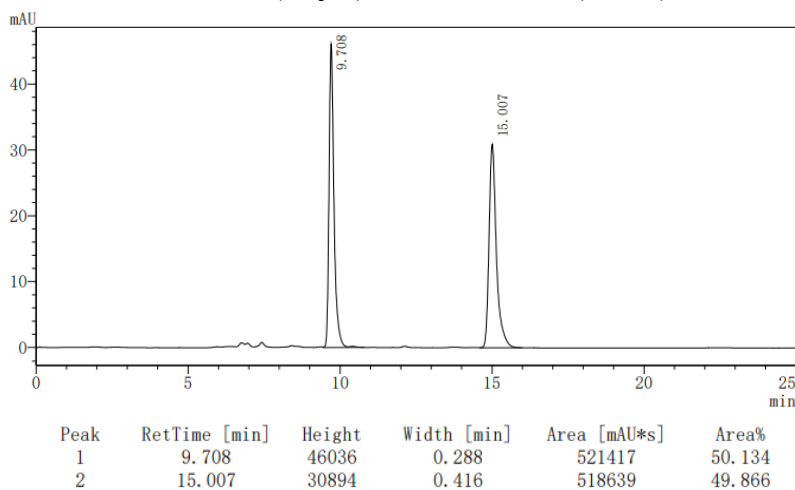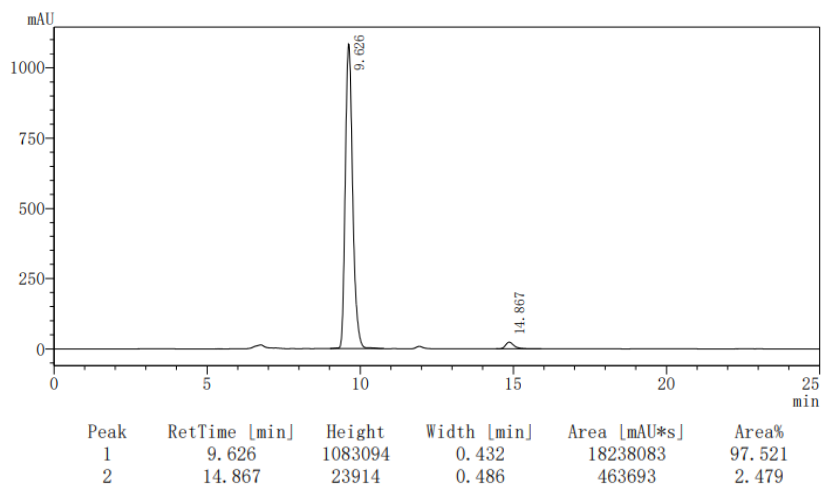

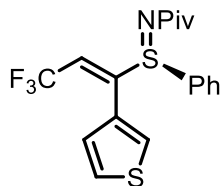

***N-((S)-phenyl((E)-3,3,3-trifluoro-1-(thiophen-3-yl)prop-1-en-1-yl)-λ<sup>4</sup>-sulfaneylidene)-pivalamide (4as)***

17.7 mg, 46% yield, 92% ee, *E/Z* > 20/1, yellow oil.

$[\alpha]_{25}^D = -3.1$  ( $c = 0.064$ ,  $\text{CHCl}_3$ ).

<sup>1</sup>H NMR (400 MHz,  $\text{CDCl}_3$ )  $\delta$  7.50 – 7.45 (m, 3H), 7.40 – 7.36 (m, 2H), 7.29 – 7.27 (m, 1H), 7.24 – 7.23 (m, 1H), 6.85 – 6.83 (m, 1H), 6.79 (q,  $J = 7.5$  Hz, 1H), 1.30 (s, 9H) ppm.

<sup>13</sup>C NMR (101 MHz,  $\text{CDCl}_3$ )  $\delta$  190.6, 145.6 (q,  $^3J_{\text{C-F}} = 5.3$  Hz), 132.7, 132.6, 129.7, 129.2, 128.2, 128.0 (q,  $^4J_{\text{C-F}} = 1.8$  Hz), 127.9 (q,  $^5J_{\text{C-F}} = 1.7$  Hz), 126.7, 122.1 (q,  $^1J_{\text{C-F}} = 273.5$  Hz), 120.7 (q,  $^2J_{\text{C-F}} = 37.0$  Hz), 40.7, 28.7 ppm.

<sup>19</sup>F NMR (376 MHz,  $\text{CDCl}_3$ )  $\delta$  -57.38 ppm.

HRMS (ESI) calcd for  $[\text{C}_{18}\text{H}_{18}\text{F}_3\text{NO}_2\text{S}_2 + \text{H}]^+$  402.0804, found 402.0808.

HPLC: Daicel Chiralpak IA-3, *n*-hexane/isopropanol 80/20, flow rate = 0.5 mL/min, uv-vis  $\lambda = 254$  nm,  $t_{\text{R}1} = 13.6$  min (major),  $t_{\text{R}2} = 27.5$  min (minor).

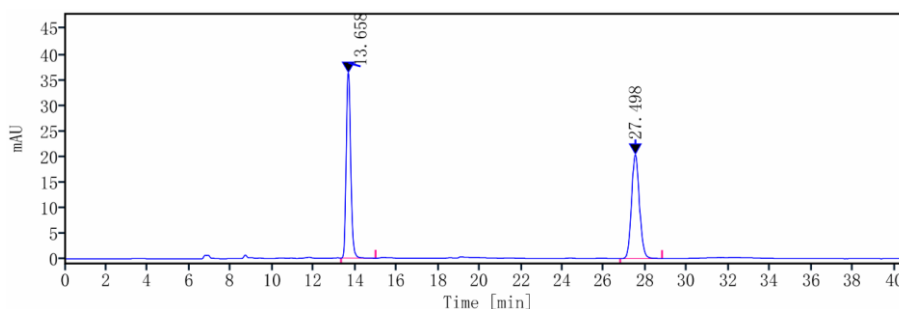

| RetTime [min] | Type | Width [min] | Area [mAU*s] | Height [mAU] | Area%   |
|---------------|------|-------------|--------------|--------------|---------|
| 13.658        | BB   | 1.6667      | 540.1580     | 36.2296      | 50.0227 |
| 27.498        | BB   | 2.0122      | 539.6681     | 20.3163      | 49.9773 |

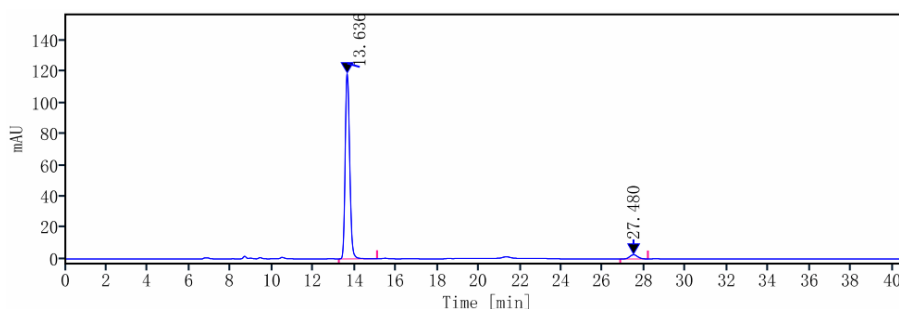

| RetTime [min] | Type | Width [min] | Area [mAU*s] | Height [mAU] | Area%   |
|---------------|------|-------------|--------------|--------------|---------|
| 13.636        | BB   | 1.8456      | 1768.7697    | 118.7441     | 96.1251 |
| 27.480        | BB   | 1.3256      | 71.3003      | 2.7228       | 3.8749  |

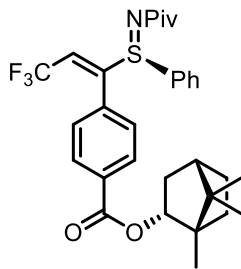

***(1S,2R,4S)-1,7,7-trimethylbicyclo[2.2.1]heptan-2-yl 4-((E)-3,3,3-trifluoro-1-((S)-S-phenyl-N-pivaloylsulfinimidoyl)prop-1-en-1-yl)benzoate (4at)***

24.1 mg, 43% yield, >20:1 dr, *E/Z* > 20/1, yellow oil.

$[\alpha]_{25}^D = +3.2$  ( $c = 0.093$ ,  $\text{CHCl}_3$ ).

**$^1\text{H NMR}$**  (300 MHz,  $\text{CDCl}_3$ )  $\delta$  7.99 – 7.95 (m, 2H), 7.56 – 7.39 (m, 6H), 7.10 – 7.06 (m, 2H), 6.82 (q,  $J = 7.4$  Hz, 1H), 5.14 – 5.09 (m, 1H), 2.53 – 2.43 (m, 1H), 2.14 – 2.05 (m, 1H), 1.88 – 1.75 (m, 3H), 1.47 – 1.38 (m, 1H), 1.33 (s, 9H), 1.12 (dd,  $J = 13.8, 3.5$  Hz, 1H), 0.98 (s, 3H), 0.94 – 0.93 (m, 6H) ppm.

**$^{13}\text{C NMR}$**  (75 MHz,  $\text{CDCl}_3$ )  $\delta$  190.9, 165.9, 149.6 (q,  $^3J_{\text{C-F}} = 5.2$  Hz), 133.7, 132.9, 132.6, 131.6, 129.9, 129.4, 129.37 (q,  $^4J_{\text{C-F}} = 1.6$  Hz), 128.6, 121.8 (q,  $^1J_{\text{C-F}} = 271.2$  Hz), 121.7 (q,  $^2J_{\text{C-F}} = 36.1$  Hz), 81.4, 49.2, 48.1, 45.0, 40.7, 37.0, 28.7, 28.2, 27.5, 19.8, 19.0, 13.8 ppm.

**$^{19}\text{F NMR}$**  (282 MHz,  $\text{CDCl}_3$ )  $\delta$  -57.11 ppm.

**HRMS** (ESI) calcd for  $[\text{C}_{31}\text{H}_{36}\text{F}_3\text{NO}_3\text{S} + \text{H}]^+$  560.2441, found 560.2440.

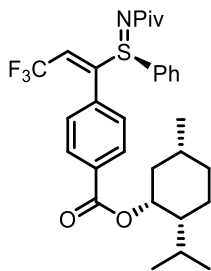

***(1R,2R,5R)-2-isopropyl-5-methylcyclohexyl-4-((E)-3,3,3-trifluoro-1-((S)-S-phenyl-N-pivaloylsulfinimidoyl)prop-1-en-1-yl)benzoate (4au)***

25.8 mg, 46% yield, >20:1 dr, *E/Z* > 20/1, yellow oil.

$[\alpha]_{25}^D = +40.0$  ( $c = 0.06$ ,  $\text{CHCl}_3$ ).

**$^1\text{H NMR}$**  (300 MHz,  $\text{CDCl}_3$ )  $\delta$  7.93 (d,  $J = 8.2$  Hz, 2H), 7.54 – 7.38 (m, 5H), 7.06 (d,  $J = 8.2$  Hz, 2H), 6.80 (q,  $J = 7.4$  Hz, 1H), 5.46 – 5.45 (m, 1H), 2.10 – 2.02 (m, 1H), 1.88 – 1.81 (m, 4H), 1.55 – 1.43 (m, 1H), 1.31 (s, 9H), 1.20 – 1.04 (m, 2H), 0.94 – 0.86 (m, 9H) ppm.

**$^{13}\text{C NMR}$**  (75 MHz,  $\text{CDCl}_3$ )  $\delta$  190.9, 165.1, 149.6 (q,  $^3J_{\text{C-F}} = 5.1$  Hz), 133.7, 132.9, 132.8, 131.6, 129.9, 129.4, 129.39 (q,  $^4J_{\text{C-F}} = 1.7$  Hz), 128.6, 121.9 (q,  $^1J_{\text{C-F}} = 271.1$  Hz), 121.7 (q,  $^2J_{\text{C-F}} = 36.0$  Hz), 72.6, 47.2, 40.7, 39.2, 34.9, 29.4, 28.6, 26.9, 25.5, 22.3, 21.1, 21.0 ppm.

**$^{19}\text{F NMR}$**  (282 MHz,  $\text{CDCl}_3$ )  $\delta$  -57.10 ppm.

**HRMS** (ESI) calcd for  $[\text{C}_{31}\text{H}_{38}\text{F}_3\text{NO}_3\text{S} + \text{H}]^+$  562.2597, found 562.2603.

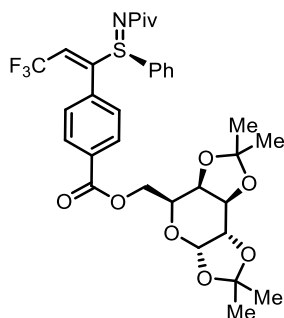

***((3a*S*,5*S*,5a*R*,8a*R*,8b*S*)-2,2,7,7-tetramethyltetrahydro-5*H*-bis([1,3]dioxolo)[4,5-*b*:4',5'-*d*]pyran-5-yl)methyl-4-((*E*)-3,3,3-trifluoro-1-((*S*)-*S*-phenyl-*N*-pivaloylsulfinimidoyl)prop-1-en-1-yl)benzoate (4av)***

37.9 mg, 57% yield, >20:1 dr, *E/Z* > 20/1, yellow oil.

$[\alpha]_{25}^D = -25.8$  ( $c = 0.062$ ,  $\text{CHCl}_3$ ).

**$^1\text{H NMR}$**  (300 MHz,  $\text{CDCl}_3$ )  $\delta$  7.95 (d,  $J = 8.1$  Hz, 2H), 7.52 – 7.36 (m, 5H), 7.05 (d,  $J = 8.1$  Hz, 2H), 6.79 (q,  $J = 7.3$  Hz, 1H), 5.57 (d,  $J = 4.9$  Hz, 1H), 4.66 (dd,  $J = 7.9$ , 2.5 Hz, 1H), 4.47 – 4.41 (m, 2H), 4.37 – 4.30 (m, 2H), 4.20 – 4.11 (m, 1H), 1.52 (s, 3H), 1.47 (s, 3H), 1.36 (s, 3H), 1.35 (s, 3H), 1.30 (s, 9H) ppm.

**$^{13}\text{C NMR}$**  (75 MHz,  $\text{CDCl}_3$ )  $\delta$  190.8, 165.5, 149.5 (q,  $^3J_{\text{C-F}} = 5.2$  Hz), 133.8, 132.8, 131.7, 131.4, 129.7, 129.5, 129.2 (q,  $^4J_{\text{C-F}} = 1.4$  Hz), 128.4, 121.7 (q,  $^1J_{\text{C-F}} = 271.0$  Hz), 121.6 (q,  $^2J_{\text{C-F}} = 36.0$  Hz), 109.8, 108.9, 96.3, 71.1, 70.7, 70.5, 66.1, 64.4, 40.6, 28.5, 26.0, 25.97, 25.0, 24.5 ppm.

**$^{19}\text{F NMR}$**  (282 MHz,  $\text{CDCl}_3$ )  $\delta$  -57.18 ppm.

**HRMS** (ESI) calcd for  $[\text{C}_{33}\text{H}_{38}\text{F}_3\text{NO}_8\text{S} + \text{H}]^+$  666.2343, found 666.2347.

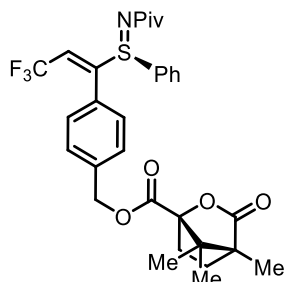

**4-((*E*)-3,3,3-trifluoro-1-((*S*)-*S*-phenyl-*N*-pivaloylsulfinimidoyl)prop-1-en-1-yl)benzyl(1*S*,4*R*)-4,7,7-trimethyl-3-oxo-2-oxabicyclo[2.2.1]heptane-1-carboxylate (4aw)**

42.4 mg, 72% yield, >20:1 dr, *E/Z* > 20/1, yellow oil.

$[\alpha]_{25}^D = +23.3$  ( $c = 0.133$ ,  $\text{CHCl}_3$ ).

$^1\text{H NMR}$  (300 MHz,  $\text{CDCl}_3$ )  $\delta$  7.58 – 7.35 (m, 5H), 7.31 – 7.29 (m, 2H), 7.01 – 6.98 (m, 2H), 6.78 (q,  $J = 7.4$  Hz, 1H), 5.25 (s, 2H), 2.49 – 2.39 (m, 1H), 2.09 – 1.88 (m, 2H), 1.74 – 1.65 (m, 2H), 1.30 (s, 9H), 1.11 (s, 3H), 1.01 (s, 3H), 0.86 (s, 3H) ppm

$^{13}\text{C NMR}$  (75 MHz,  $\text{CDCl}_3$ )  $\delta$  190.7, 178.1, 167.4, 149.8 (q,  $^3J_{\text{C-F}} = 5.2$  Hz), 137.6, 132.7, 131.8, 129.7, 129.6 (q,  $^4J_{\text{C-F}} = 1.4$  Hz), 128.5, 128.1, 124.8, 121.9 (q,  $^1J_{\text{C-F}} = 271.1$  Hz), 121.3 (q,  $^2J_{\text{C-F}} = 35.8$  Hz), 91.0, 66.3, 54.9, 54.5, 40.6, 30.8, 29.0, 28.6, 27.2, 16.8, 16.7, 9.8 ppm.

$^{19}\text{F NMR}$  (282 MHz,  $\text{CDCl}_3$ )  $\delta$  -57.12 ppm.

**HRMS** (ESI) calcd for  $[\text{C}_{31}\text{H}_{34}\text{F}_3\text{NO}_5\text{S} + \text{Na}]^+$  612.2002, found 612.2008.

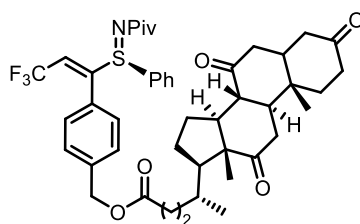

**4-((1E)-3,3,3-trifluoro-1-((S)-S-phenyl-N-pivaloylsulfinimidoyl)prop-1-en-1-yl)benzyl(4R)-4-((8R,9S,10S,13R,14S,17R)-10,13-dimethyl-3,7,12-trioxohexadecahydro-1H-cyclopenta[a]phenanthren-17-yl)pentanoate (4ax)**

53.2 mg, 67% yield, >20:1 dr, *E/Z* > 20/1, yellow oil.

$[\alpha]_{25}^D = +27.4$  ( $c = 0.062$ ,  $\text{CHCl}_3$ ).

**$^1\text{H}$  NMR** (300 MHz,  $\text{CDCl}_3$ )  $\delta$  7.53 – 7.34 (m, 5H), 7.28 – 7.24 (m, 2H), 7.05 – 6.96 (m, 2H), 6.77 (q,  $J = 7.4$  Hz, 1H), 5.10 (s, 2H), 2.99 – 2.80 (m, 3H), 2.53 – 2.41 (m, 1H), 2.40 – 2.29 (m, 4H), 2.27 – 2.23 (m, 2H), 2.21 – 2.15 (m, 2H), 2.14 – 2.10 (m, 1H), 2.09 – 1.98 (m, 4H), 1.96 – 1.92 (m, 1H), 1.91 – 1.79 (m, 3H), 1.69 – 1.55 (m, 1H), 1.44 – 1.38 (m, 4H), 1.32 – 1.28 (m, 10H), 1.05 (s, 3H), 0.85 (d,  $J = 6.6$  Hz, 3H). ppm.

**$^{13}\text{C}$  NMR** (75 MHz,  $\text{CDCl}_3$ )  $\delta$  212.1, 209.2, 208.8, 190.7, 173.8, 145.0 (q,  $^3J_{\text{C-F}} = 5.2$  Hz), 138.7, 132.7, 131.9, 129.7, 129.4 (q,  $^4J_{\text{C-F}} = 1.3$  Hz), 129.1, 128.5, 127.7, 122.0 (q,  $^1J_{\text{C-F}} = 271.0$  Hz), 121.4 (q,  $^2J_{\text{C-F}} = 31.7$  Hz), 65.2, 57.0, 51.9, 49.1, 46.9, 45.7, 45.6, 45.1, 42.9, 40.7, 38.7, 36.6, 36.1, 35.6, 35.4, 31.5, 30.5, 28.6, 27.7, 25.2, 22.0, 18.7, 11.9 ppm.

**$^{19}\text{F}$  NMR** (282 MHz,  $\text{CDCl}_3$ )  $\delta$  -57.00 ppm.

**HRMS** (ESI) calcd for  $[\text{C}_{45}\text{H}_{54}\text{F}_3\text{NO}_6\text{S} + \text{H}]^+$  794.3697, found 794.3698.

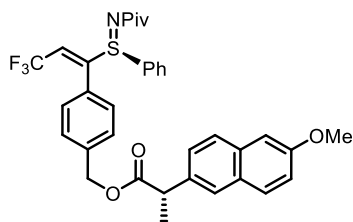

**4-((E)-3,3,3-trifluoro-1-((S)-S-phenyl-N-pivaloylsulfinimidoyl)prop-1-en-1-yl)benzyl (S)-2-(6-methoxynaphthalen-2-yl)propanoate (4ay)**

39.7 mg, 64% yield, >20:1 dr, *E/Z* > 20/1, yellow oil.

$[\alpha]_{25}^D = +42.7$  ( $c = 0.082$ ,  $\text{CHCl}_3$ ).

$^1\text{H NMR}$  (300 MHz,  $\text{CDCl}_3$ )  $\delta$  7.71 – 7.63 (m, 3H), 7.45 – 7.28 (m, 6H), 7.16 – 7.09 (m, 4H), 6.94 – 6.88 (m, 2H), 6.74 (q,  $J = 7.4$  Hz, 1H), 5.09 (s, 2H), 3.94 – 3.88 (m, 4H), 1.60 (d,  $J = 7.2$  Hz, 2H), 1.30 (s, 9H) ppm.

$^{13}\text{C NMR}$  (75 MHz,  $\text{CDCl}_3$ )  $\delta$  190.7, 174.4, 157.9, 149.9 (q,  $^3J_{\text{C-F}} = 5.2$  Hz), 138.6, 135.4, 133.9, 132.6, 131.9, 129.6, 129.35 (q,  $^4J_{\text{C-F}} = 1.9$  Hz), 129.33, 129.04, 129.00, 128.4, 127.48, 127.44, 127.3, 126.2, 126.1, 122.0 (q,  $^1J_{\text{C-F}} = 270.9$  Hz), 120.8 (q,  $^2J_{\text{C-F}} = 36.2$  Hz), 119.3, 105.7, 65.5, 55.4, 45.5, 40.7, 28.6, 18.6 ppm.

$^{19}\text{F NMR}$  (282 MHz,  $\text{CDCl}_3$ )  $\delta$  -57.05 ppm.

**HRMS** (ESI) calcd for  $[\text{C}_{35}\text{H}_{34}\text{F}_3\text{NO}_4\text{S} + \text{H}]^+$  622.2233, found 622.2238.

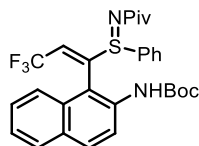

***tert-butyl (1-((E)-3,3,3-trifluoro-1-((E)-S-phenyl-N-pivaloylsulfonimidoyl)prop-1-en-1-yl)naphthalen-2-yl)carbamate (4ba)***

24.9 mg, 46% yield, 96% ee, *E/Z* > 20/1, *dr* > 20/1, yellow oil.

$[\alpha]_{25}^D = +177.9$  ( $c = 0.113$ ,  $\text{CHCl}_3$ ).

$^1\text{H NMR}$  (400 MHz,  $\text{CDCl}_3$ )  $\delta$  8.05 – 8.03 (m, 1H), 7.86 – 7.75 (m, 3H), 7.51 – 7.46 (m, 1H), 7.44 – 7.34 (m, 4H), 7.29 – 7.25 (m, 2H), 7.02 (q,  $J = 7.0$  Hz, 1H), 6.49 (s, 1H), 1.44 (s, 9H), 1.38 (s, 9H) ppm.

$^{13}\text{C NMR}$  (101 MHz,  $\text{CDCl}_3$ )  $\delta$  191.1, 152.1, 146.9 (q,  $^3J_{\text{C-F}} = 4.6$  Hz), 136.12 (q,  $^4J_{\text{C-F}} = 1.1$  Hz), 133.2, 131.8, 131.5, 130.8, 129.7, 129.6, 128.1, 128.1, 128.0, 125.7 (q,  $^2J_{\text{C-F}} = 36.3$  Hz), 125.4, 124.7, 121.5 (q,  $^1J_{\text{C-F}} = 274.4$  Hz), 80.9, 40.8, 28.8, 18.4 ppm.

$^{19}\text{F NMR}$  (377 MHz,  $\text{CDCl}_3$ )  $\delta$  -60.80 ppm.

**HRMS** (ESI) calcd for  $[\text{C}_{29}\text{H}_{31}\text{F}_3\text{N}_2\text{O}_3\text{S} + \text{H}]^+$  545.2080, found 545.2076.

**HPLC**: Daicel Chiralpak IC-3, *n*-hexane/isopropanol 80/20, flow rate = 0.5 mL/min, uv-vis  $\lambda = 254$  nm,  $t_{\text{R}1} = 12.3$  min (major),  $t_{\text{R}2} = 24.2$  min (minor).

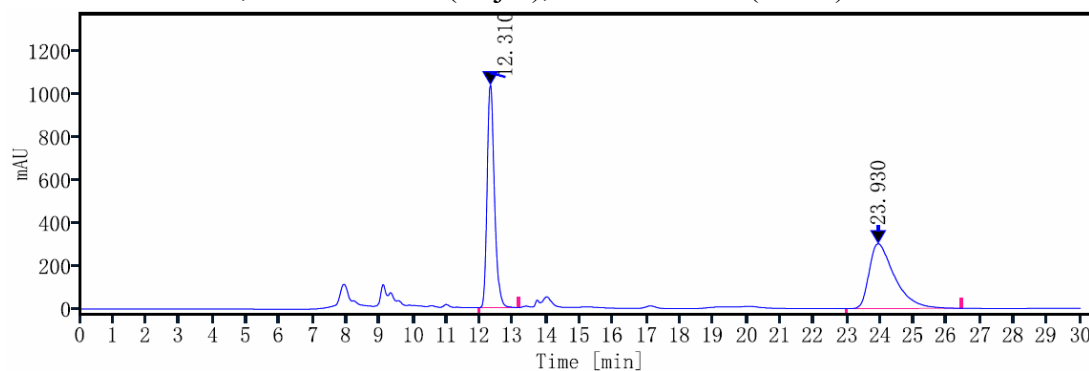

| RetTime [min] | Type | Width [min] | Area [mAU*s] | Height [mAU] | Area%   |
|---------------|------|-------------|--------------|--------------|---------|
| 12.310        | VB   | 1.1775      | 15729.5356   | 1036.5203    | 49.6402 |
| 23.930        | BM m | 0.7908      | 15957.5793   | 301.8120     | 50.3598 |

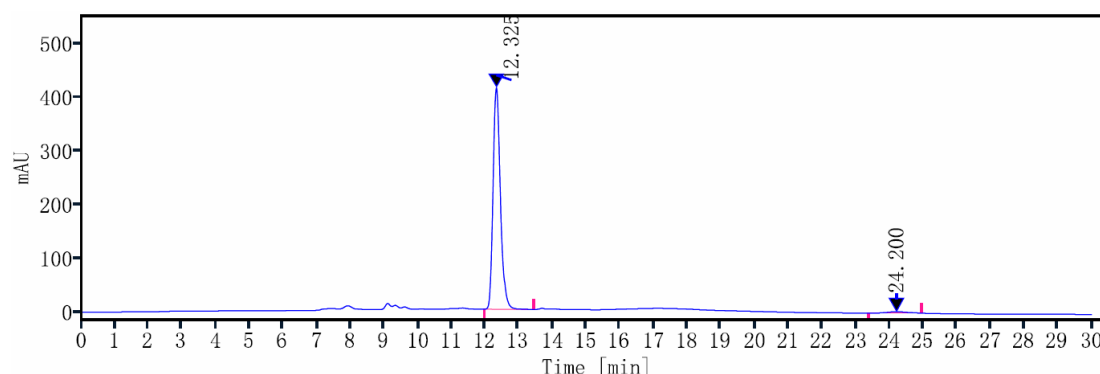

| RetTime [min] | Type | Width [min] | Area [mAU*s] | Height [mAU] | Area%   |
|---------------|------|-------------|--------------|--------------|---------|
| 12.325        | VB   | 1.4592      | 6211.6669    | 413.2567     | 98.0952 |
| 24.200        | BM m | 0.7114      | 120.6154     | 2.7196       | 1.9048  |

#### 4. Synthetic Applications

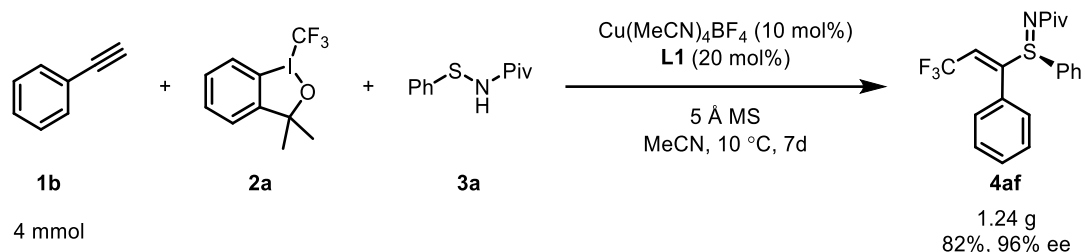

An oven-dried 250 mL Schlenk tube was charged with **2a** (6.0 mmol, 1.5 equiv), **3a** (8 mmol, 2.0 equiv),  $\text{Cu}(\text{MeCN})_4\text{BF}_4$  (125.8 mg, 0.4 mmol, 10 mol%), **L1** (529.8 mg, 0.8 mmol, 20 mol%), 5 Å MS (2.0 g), the vial was thoroughly flushed with Ar, **1b** (4.0 mmol, 1.0 equiv) and MeCN (40.0 mL) was added via a syringe under Ar atmosphere. The reaction mixture was vigorously stirred at 10 °C for 4 d. After cooling to room temperature, the reaction mixture was diluted with EA (10.0 mL) and filtered through a plug of Celite. The filtrate was washed with water and brine, dried over anhydrous  $\text{Na}_2\text{SO}_4$ , and concentrated under vacuum to give dark residue, which was purified by flash chromatography on silica gel to afford products **4af** (1.24 g, 82%, 96% ee).

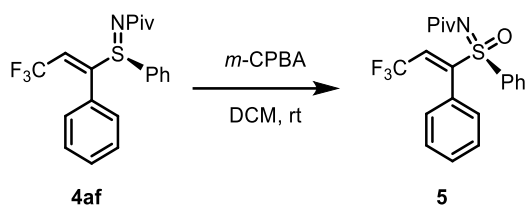

To a 50 mL round-bottom flask was charged with **4af** (0.5 mmol, 1.0 equiv, 189.7 mg), followed by the addition of DCM (10.0 mL, 0.05 M) and *m*-CPBA (5.0 mmol, 10.0 equiv, 1.0 g). The reaction mixture was stirred at room temperature for 24 hours, then quenched with saturated sodium bicarbonate solution. The mixture was extracted with 10.0 mL DCM three times, and the combined organic layers were concentrated under reduced pressure. Purification was performed by column chromatography.

**(*R*)-*N*-(oxo(phenyl)(3,3,3-trifluoro-1-phenylprop-1-en-1-yl)- $\lambda^6$ -sulfaneylidene)pivalamide (**5**)**

85.2 mg, 43% yield, 95% ee, yellow oil.

$[\alpha]_{25}^D = -18.7$  ( $c = 0.064$ ,  $\text{CHCl}_3$ ).

**$^1\text{H}$  NMR** (400 MHz,  $\text{CDCl}_3$ )  $\delta$  7.73 – 7.63 (m, 3H), 7.55 – 7.46 (m, 1H), 7.40 – 7.26 (m, 1H), 7.24 – 7.19 (m, 1H), 6.82 – 6.71 (m, 1H), 1.19 (s, 3H) ppm.

**$^{13}\text{C}$  NMR** (101 MHz,  $\text{CDCl}_3$ )  $\delta$  188.2, 153.0 (q,  $^3J_{\text{C-F}} = 5.1$  Hz), 134.5, 134.4, 130.3, 129.8 (q,  $^4J_{\text{C-F}} = 1.3$  Hz), 129.41, 129.39, 127.9, 127.6, 127.5 (q,  $^2J_{\text{C-F}} = 36.2$  Hz), 121.5 (q,  $^1J_{\text{C-F}} = 273.5$  Hz), 41.8, 27.7 ppm.

**$^{19}\text{F}$  NMR** (376 MHz,  $\text{CDCl}_3$ )  $\delta$  -58.24 ppm.

**HRMS** (ESI) calcd for  $[\text{C}_{20}\text{H}_{20}\text{F}_3\text{NO}_2\text{S} + \text{H}]^+$  396.1240, found 396.1245.

**HPLC**: Daicel Chiralpak AD-H, *n*-hexane/isopropanol 90/10, flow rate = 0.5 mL/min, uv-vis  $\lambda = 254$  nm,  $t_{\text{R}1} = 13.1$  min (minor),  $t_{\text{R}2} = 15.8$  min (major).

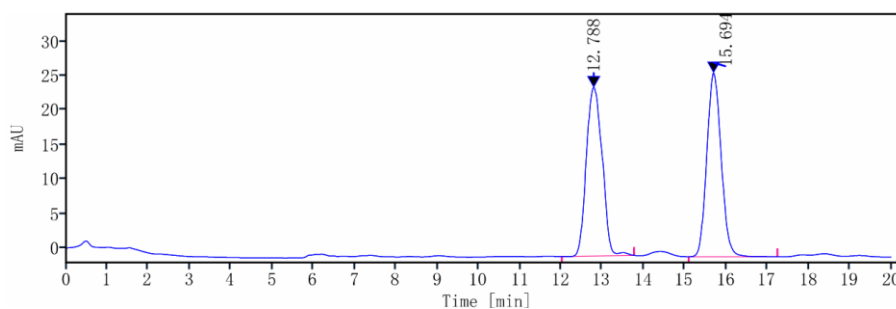

| RetTime[min] | Type | Width[min] | Area[mAU*s] | Height[mAU] | Area%   |
|--------------|------|------------|-------------|-------------|---------|
| 12.788       | BM m | 0.4076     | 653.8907    | 24.4835     | 50.2591 |
| 15.694       | BB   | 2.1467     | 647.1478    | 26.6892     | 49.7409 |

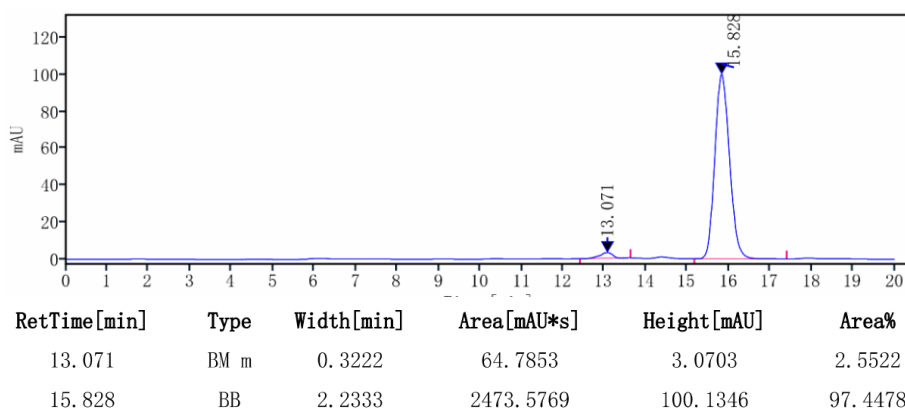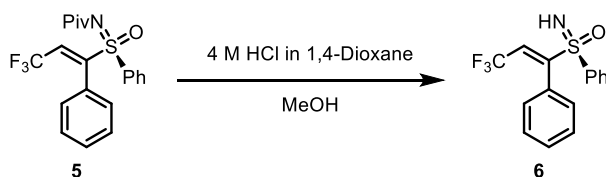

**5** (39.5 mg) was placed in a 25 mL round-bottom flask, followed by the addition of 4.0 M HCl in 1,4-Dioxane (1.0 mL) and methanol (1.0 mL). The reaction mixture was stirred at room temperature for 24 hours, then quenched with a saturated sodium bicarbonate solution. The mixture was extracted three times with dichloromethane (DCM). The combined organic layers were concentrated under reduced pressure, and the crude product was purified by column chromatography.

***(R)*-imino(phenyl)(3,3,3-trifluoro-1-phenylprop-1-en-1-yl)- $\lambda^6$ -sulfanone (**6**)**

19.9 mg, 64% yield, 92% ee, white solid. m.p. 79–81 °C.

$^1\text{H NMR}$  (400 MHz,  $\text{CDCl}_3$ )  $\delta$  7.69 – 7.66 (m, 2H), 7.60 – 7.55 (m, 1H), 7.44 – 7.40 (m, 2H), 7.38 – 7.33 (m, 1H), 7.27 – 7.22 (m, 2H), 7.13 (q,  $J = 7.2$  Hz, 1H), 6.95 – 6.93 (m, 2H), 3.05 (br s, 1H) ppm.

$^{13}\text{C NMR}$  (101 MHz,  $\text{CDCl}_3$ )  $\delta$  156.0 (q,  $^3J_{\text{C-F}} = 4.9$  Hz), 137.3, 133.8, 129.8, 129.7 (q,  $^4J_{\text{C-F}} = 1.4$  Hz), 129.4, 129.0, 128.7, 127.9, 124.0 (q,  $^2J_{\text{C-F}} = 35.6$  Hz), 121.9 (q,  $^1J_{\text{C-F}} = 273.3$  Hz) ppm.

$^{19}\text{F NMR}$  (376 MHz,  $\text{CDCl}_3$ )  $\delta$  -58.11 ppm.

**HRMS** (ESI) calcd for  $[\text{C}_{15}\text{H}_{12}\text{F}_3\text{NOS} + \text{H}]^+$  312.0664, found 312.0667.

**HPLC**: Daicel Chiralpak OD-H, *n*-hexane/isopropanol 90/10, flow rate = 0.5 mL/min, uv-vis  $\lambda = 280$  nm,  $t_{\text{R1}} = 21.4$  min (minor),  $t_{\text{R2}} = 24.7$  min (major).

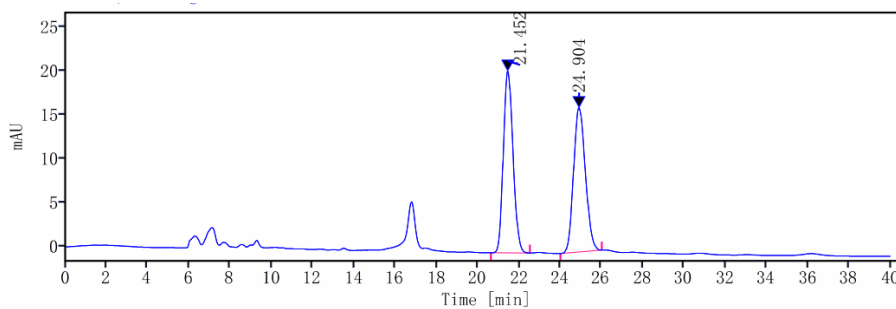

| RetTime [min] | Type | Width [min] | Area [mAU*s] | Height [mAU] | Area%   |
|---------------|------|-------------|--------------|--------------|---------|
| 21.452        | BB   | 1.8867      | 675.5312     | 20.7155      | 50.7287 |
| 24.904        | BB   | 2.0017      | 656.1243     | 16.4394      | 49.2713 |

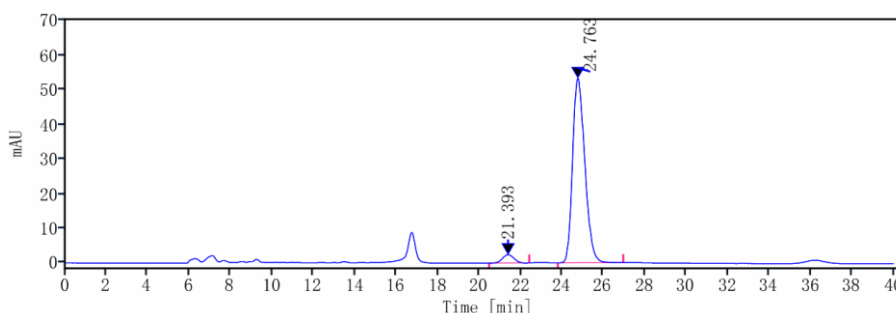

| RetTime [min] | Type | Width [min] | Area [mAU*s] | Height [mAU] | Area%   |
|---------------|------|-------------|--------------|--------------|---------|
| 21.393        | BM m | 0.5813      | 90.4938      | 2.4141       | 3.9728  |
| 24.763        | BB   | 3.1533      | 2187.3457    | 53.2332      | 96.0272 |

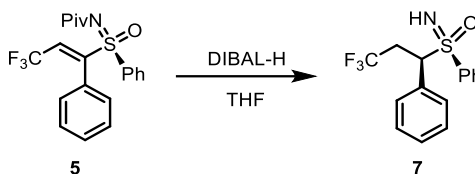

**5** (39.5 mg, 0.1 mmol, 1.0 equiv) was charged into a 25 mL round-bottom flask under an argon atmosphere. Anhydrous THF was introduced, and the mixture was cooled to 0 °C. A solution of 1 M DIBAL-H in THF (1.6 mL, 1.6 mmol, 16.0 equiv) was then added dropwise. The reaction was maintained at 0 °C for 24 hours, then quenched with a saturated sodium bicarbonate solution. The mixture was extracted three times with dichloromethane (DCM). The combined organic layers were concentrated under reduced pressure, and the crude product was purified by column chromatography.

**(S)-imino(phenyl)((R)-3,3,3-trifluoro-1-phenylpropyl)-λ<sup>6</sup>-sulfanone (7)**

21.9 mg, 70% yield, 95% ee, 11:1 dr, white solid. m.p. 110–112 °C.

$[\alpha]_{25}^D = +61.6$  ( $c = 0.06$ , CHCl<sub>3</sub>).

<sup>1</sup>H NMR (400 MHz, CDCl<sub>3</sub>) δ 7.79 – 7.76 (m, 2H), 7.63 – 7.59 (m, 1H), 7.52 – 7.46 (m, 2H), 7.40 – 7.26 (m, 5H), 4.24 (dd,  $J = 10.0, 4.1$  Hz, 1H), 3.11 – 2.98 (m, 2H), 2.76 (br s, 1H) ppm.

<sup>13</sup>C NMR (101 MHz, CDCl<sub>3</sub>) δ 138.0, 133.7, 130.7, 130.0, 129.6, 129.4, 129.2, 128.8, 125.5 (q,  $^1J_{C-F} = 277.9$  Hz), 67.6 (q,  $^3J_{C-F} = 2.4$  Hz), 34.3 (q,  $^2J_{C-F} = 29.5$  Hz) ppm.

<sup>19</sup>F NMR (376 MHz, CDCl<sub>3</sub>) δ -63.44 ppm.

HRMS (ESI) calcd for  $[C_{15}H_{14}F_3NOS + Na]^+$  336.0640, found 336.0642.

HPLC: Daicel Chiralpak AS-H, *n*-hexane/isopropanol 90/10, flow rate = 0.5 mL/min, uv-vis  $\lambda = 254$  nm,  $t_{R1} = 28.6$  min (major),  $t_{R2} = 33.6$  min (minor).

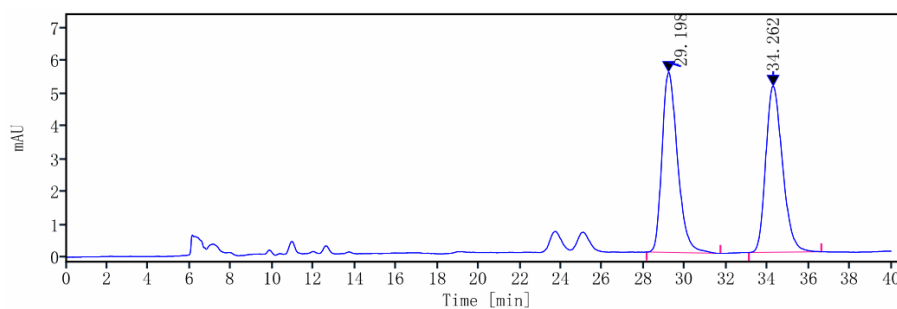

| RetTime[min] | Type | Width[min] | Area[mAU*s] | Height[mAU] | Area%   |
|--------------|------|------------|-------------|-------------|---------|
| 29.198       | BB   | 3.5800     | 287.3306    | 5.4833      | 50.1805 |
| 34.262       | BB   | 3.5133     | 285.2637    | 5.0537      | 49.8195 |

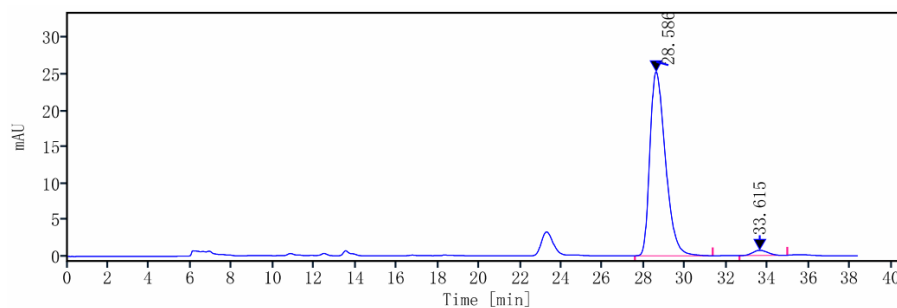

| RetTime[min] | Type | Width[min] | Area[mAU*s] | Height[mAU] | Area%   |
|--------------|------|------------|-------------|-------------|---------|
| 28.586       | BB   | 3.7667     | 1323.3877   | 25.2603     | 97.4251 |
| 33.615       | MM m | 0.7391     | 34.9769     | 0.7047      | 2.5749  |

## 5. Mechanistic Studies

### 5.1 Radical trapping experiment

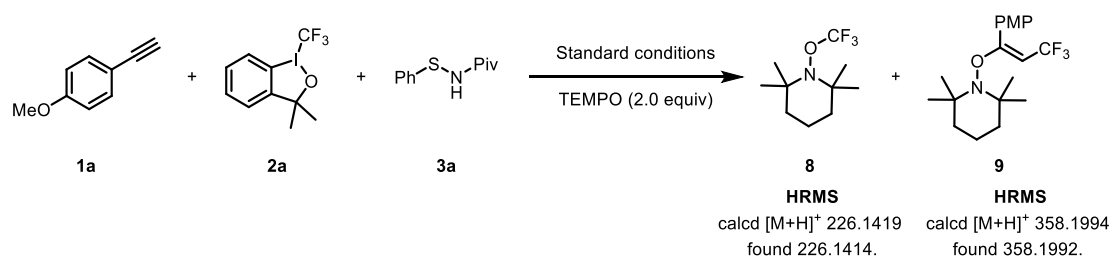

A sealed tube was charged with **2a** (49.5 mg, 0.15 mmol, 1.5 equiv), **3a** (41.8 mg, 0.2 mmol, 2.0 equiv), Cu(MeCN)<sub>4</sub>BF<sub>4</sub> (3.2 mg, 0.01 mmol, 10 mol%), **L1** (13.2 mg, 0.02 mmol, 20 mol%), 5 Å MS (50.0 mg), TEMPO (32.2 mg, 0.2 mmol, 2.0 equiv). The vial was thoroughly flushed with Ar, **1a** (0.1 mmol, 1.0 equiv) and MeCN (1.0 mL) was added via a syringe under Ar atmosphere. The reaction mixture was vigorously stirred at 10 °C for 4 d. After cooling to room temperature, the reaction mixture was diluted with MeOH filtered through a plug of Celite. The reaction mixture was analyzed by HRMS. The trifluoromethyl radical and alkenyl radical captured by TEMPO was detected by HRMS. This result suggests that a radical mechanism might be operative. The trifluoromethyl radical and alkenyl radical was generated under the current reaction conditions.

### 5.2 Nonlinear effect (NLE) experiments

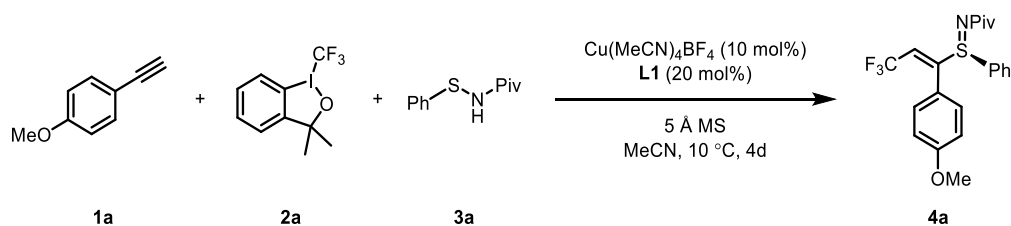

A sealed tube was charged with **2a** (49.5 mg, 0.15 mmol, 1.5 equiv), **3a** (41.8 mg, 0.2 mmol, 2.0 equiv), Cu(MeCN)<sub>4</sub>BF<sub>4</sub> (3.2 mg, 0.01 mmol, 10 mol%), **L1** (13.2 mg, 0.02 mmol, 20 mol%), mixtures of two enantiomers determined by weight), 5 Å MS (50.0 mg). The vial was thoroughly flushed with Ar, **1a** (0.1 mmol, 1.0 equiv) and MeCN (1.0 mL) was added via a syringe under Ar atmosphere. The reaction mixture was diluted with EA (2.0 mL) and filtered through a plug of Celite. The filtrate was washed with water and brine, dried over anhydrous Na<sub>2</sub>SO<sub>4</sub>, and concentrated under vacuum to give dark residue, which was purified by flash chromatography on silica gel to afford products **4a**. Analysis of the pure samples by chiral HPLC provided the reported enantiomeric excesses.

The results were listed as follows in **Table S6** and **Figure S3**.

| Entry          | 1 | 2  | 3  | 4  | 5  | 6   |
|----------------|---|----|----|----|----|-----|
| Ligad ee (%)   | 0 | 20 | 40 | 60 | 80 | >99 |
| Product ee (%) | 0 | 22 | 37 | 62 | 85 | 96  |

**Table S6.** The ee of **4a** at different ee of **L1**

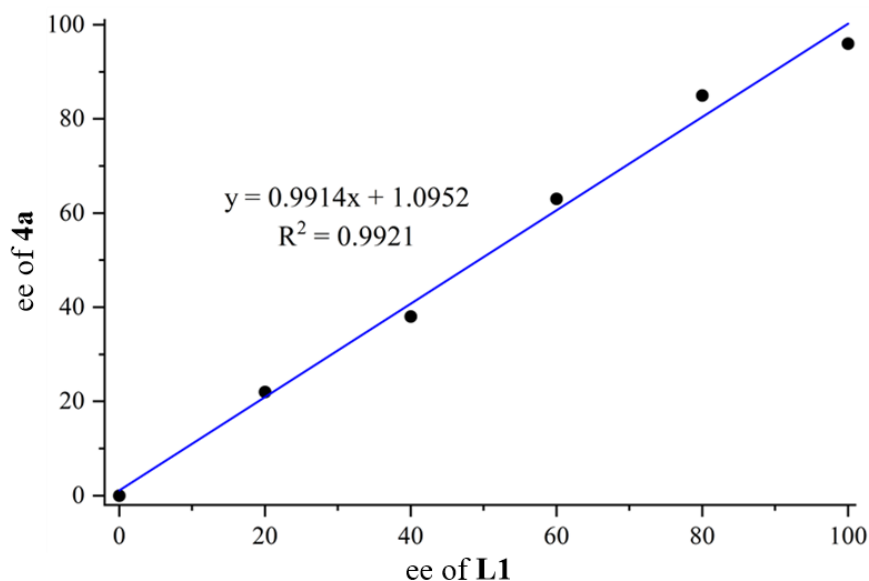

**Figure S3.** The ee of **4a** at different ee of **L1**

### 5.3 EPR experiments

**Conditions A:** All operations were conducted in a N<sub>2</sub>-filled glove-box. A sealed tube was charged with **2a** (49.5 mg, 0.15 mmol, 1.5 equiv), **3a** (41.8 mg, 0.2 mmol, 2.0 equiv), Cu(MeCN)<sub>4</sub>BF<sub>4</sub> (3.2 mg, 0.01 mmol, 10 mol%), **L1** (13.2 mg, 0.02 mmol, 20 mol%), **1a** (0.1 mmol, 1.0 equiv) and MeCN (1.0 mL) was added via a syringe under N<sub>2</sub> atmosphere. React at room temperature for 30 minutes, DMPO (0.4 mmol, 4.0 equiv) were added to the resulting mixture. After the reaction finished, the electron paramagnetic resonance (EPR) analysis of the reaction mixture revealed a strong radical signal (**Figure S4**), which would be assigned to the trapped alkenyl radical by DMPO according to the simulated spectrum (fitting results: for the alkenyl radical,  $g = 2.0063$ ,  $A_H = 16.2$  G,  $A_N = 13.6$  G).

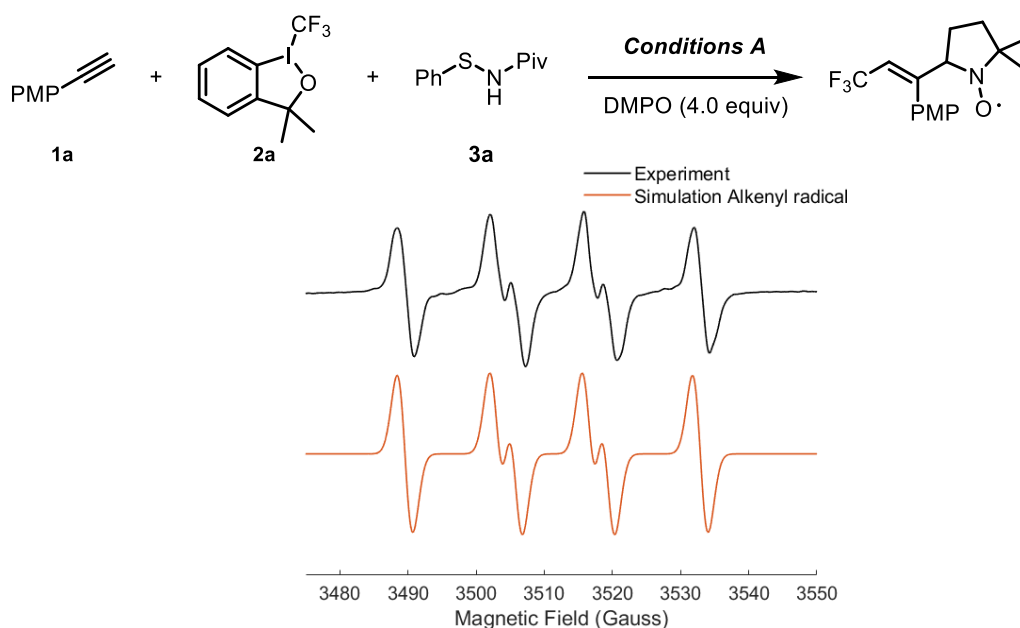

**Figure S4.** EPR spectra of trapped alkenyl radical by DMPO

**Conditions B:** All operations were conducted in a N<sub>2</sub>-filled glove-box. A sealed tube was charged with **2a** (49.5 mg, 0.15 mmol, 1.5 equiv), **3a** (41.8 mg, 0.2 mmol, 2.0 equiv), Cu(MeCN)<sub>4</sub>BF<sub>4</sub> (3.2 mg, 0.01 mmol, 10 mol%), **L1** (13.2 mg, 0.02 mmol, 20 mol%), **1a** (0.1 mmol, 1.0 equiv) and MeCN (1.0 mL) was added via a syringe under N<sub>2</sub> atmosphere. React at room temperature for 30 minutes, PBN (0.4 mmol, 4.0 equiv) were added to the resulting mixture. After the reaction finished, the electron paramagnetic resonance (EPR) analysis of the reaction mixture revealed a strong radical signal (**Figure S5**), which would be assigned to the trapped trifluoromethyl radical and alkenyl radical by PBN according to the simulated spectrum (fitting results: for the alkenyl radical,  $g = 2.006$ ,  $A_H = 2.1$  G,  $A_N = 14.2$  G; for the trifluoromethyl radical  $g = 2.006$ ,  $A_N = 14.2$  G,  $A_H = 1.5$  G,  $A_F = 1.6$  G).

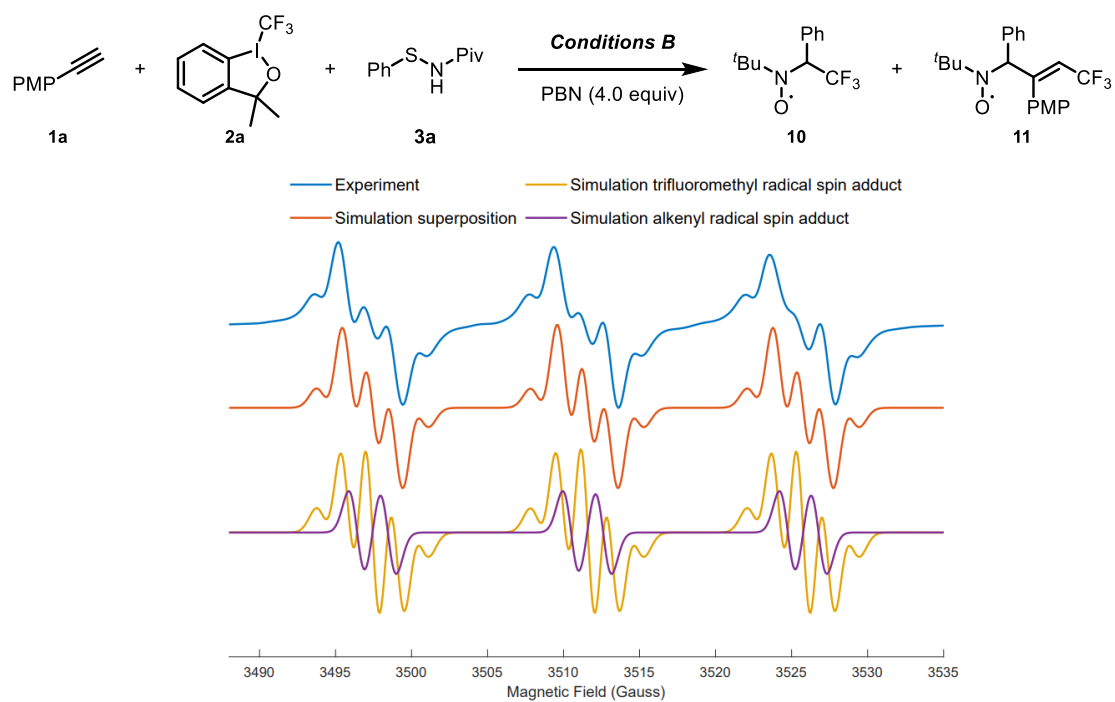

**Figure S5.** EPR spectra of trapped trifluoromethyl radical and alkenyl radical by PBN

## 6. Determination of the absolute configurations of 7

**Experimental:** Single Crystal 7 was grown by slow evaporation of concentrated solution in the mixed solution of DCM and *n*-Hexane in glass vial, which was then sealed by plug with needle on it.

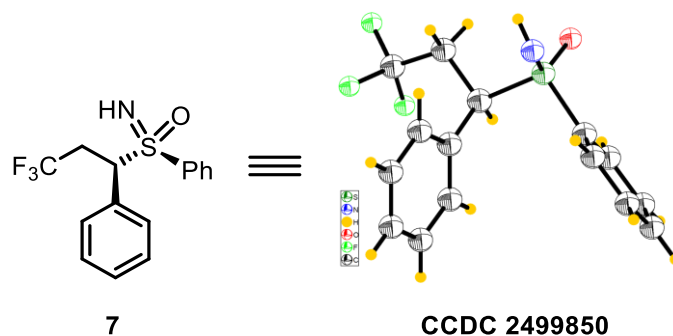

### ORTEP plot of the crystal structure of 7 (50% ellipsoid probability)

X-ray crystallographic data of 7

|                        |                                                                       |
|------------------------|-----------------------------------------------------------------------|
| CCDC number            | 2499850                                                               |
| Bond precision         | C-C = 0.0041 Å                                                        |
| Cell                   | a=5.93442(8) b=16.8551 (3) c=28.1750 (4)<br>alpha=90 beta=90 gamma=90 |
| Temperature            | 150 K                                                                 |
| Volume                 | 2818.21 (7)                                                           |
| Space group            | P 21 21 21                                                            |
| Sum formula            | C <sub>15</sub> H <sub>14</sub> F <sub>3</sub> NOS                    |
| Mr                     | 313.33                                                                |
| Dx, g cm <sup>-3</sup> | 1.477                                                                 |
| Z                      | 8                                                                     |
| Mu (mm <sup>-1</sup> ) | 2.356                                                                 |
| F000                   | 1296.0                                                                |
| h, k, lmax             | 7,21,35                                                               |
| Tmin, Tmax             | 0.441, 1.000                                                          |
| Correction method      | # Reported T Limits: Tmin=0.441<br>Tmax=1.000                         |
| AbsCorr                | MULTI-SCAN                                                            |
| Data completeness      | 1.66/0.96                                                             |
| Theta(max)             | 75.882                                                                |
| R(reflections)         | 0.0320 (5482)                                                         |
| wR2(reflections)       | 0.0853 (5640)                                                         |
| S                      | 1.049                                                                 |

## 7. DFT calculations

### 7.1 Computational methods

All density functional theory (DFT) calculations were performed with Gaussian 16 program.<sup>11</sup> Geometry optimizations were performed using the (U)B3LYP functional,<sup>12</sup> employing the D3 version of Grimme's dispersion corrections<sup>13</sup> with Becke-Johnson damping.<sup>14</sup> The LANL2DZ basis set<sup>15</sup> was used for Cu and I, and the 6-31G(d) basis set was used for all other light atoms. After optimization, frequency calculations were performed at the same level of theory to characterize the stationary points as either minima (no imaginary frequencies) or saddle points (one imaginary frequency) on the potential energy surface, as well as to evaluate zero-point vibrational energies and thermodynamic corrections for free energies at 283.15 K, 1 atm. For all transition states, Intrinsic Reaction Coordinate (IRC)<sup>16</sup> calculations were performed to confirm that the transition state connects with its respective reactant and product. Single-point energies of optimized structures were calculated using the (U)PBE0 functionals<sup>17</sup> employing the D3 version of Grimme's dispersion corrections and Becke-Johnson damping with def2-TZVP basis set<sup>18</sup> was used for all atoms (assigned def2-ECP for I). SMD solvation model<sup>19</sup> (solvent = Acetonitrile) was used in single-point energy calculations to consider solvent effect. The final Gibbs free energy was calculated as the sum of Gibbs free energy correction (from frequency calculation) and the single point energy in solution. For each species, extensive conformational search was done and the reported value is from the conformer with the lowest Gibbs free energy. A wavefunction stability test at the same level of theory as the geometry optimizations was employed to ensure that the SCF-converged wavefunction was stable. Graphics of the transition states were rendered using CYLview<sup>20</sup>. The visualizations of energy barriers were performed by EnePro v1.6 script<sup>21</sup>.

The reaction involving **1b**, **2a**, and **3k** was selected for computational analysis, and the energy profile were presented in **Figure S6** and **Figure S7**. The conformations of transition states and intermediates were carefully examined; the relative electronic

energy and Gibbs free energy of transition states and intermediates were listed in **Table S7**.

## 7.2 Gibbs energy profiles

The energy profile for the activation of the Togni reagent by the cationic Cu(I) complex is presented in **Figure S6**. The profile starts from **Int1**, in which Cu(I) is coordinated to the chiral ligand **L1** and substrate **3k**. Solvent-coordinated intermediates **CuL\*2MeCN** and **CuL\*MeCN** were also considered, with the latter being lower in relative Gibbs free energy. Given the complexity of solvent coordination for **CuL\***, only selected examples are provided here without detailed discussion. Following ligand exchange, **Int2** forms with a free energy increase of 1.7 kcal/mol. A subsequent single-electron transfer (SET) from **Int2** proceeds via transition state <sup>oss</sup>TS<sub>SET</sub> with a free energy barrier of 17.3 kcal/mol, giving the Cu(II) species **Int3** and a trifluoromethyl radical (CF<sub>3</sub>). The relative free energy of **Int3** is 2.9 kcal/mol higher than that of **Int2**. **3k** was then coordinated with copper in **Int3** to form the intermediate **Int4**.

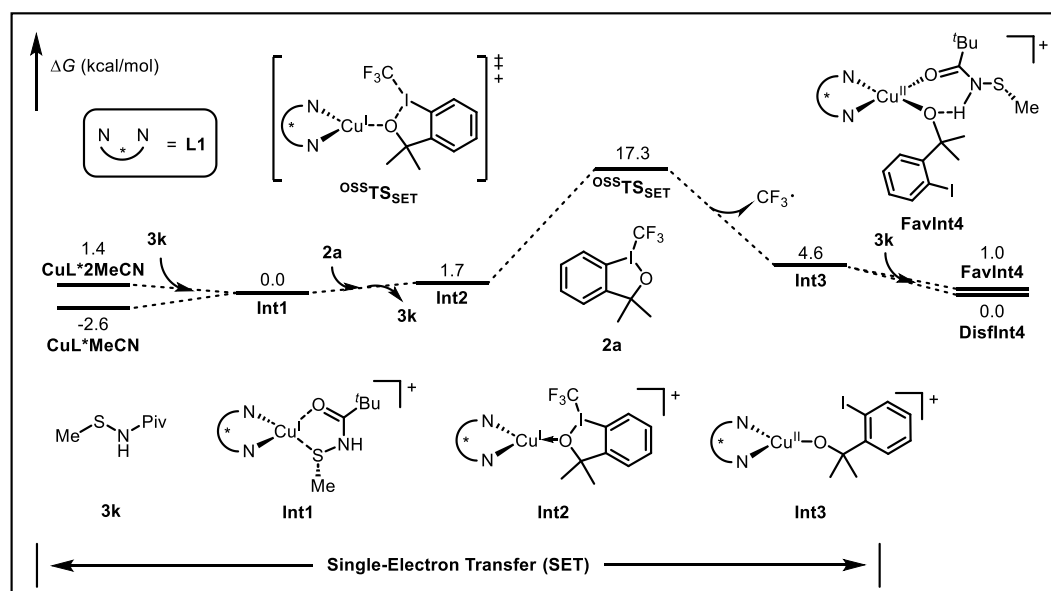

**Figure S6.** The energy profile for the activation of the Togni reagent

From the **Int4**, an O,S-chelation intermediate formation followed by an SH2 process involving an outer-sphere-generated radical directly attack was first considered.

However, numerous attempts to locate the transition state for this pathway failed. Instead, the O,S-chelated copper species appeared to directly lead to product formation. Subsequently, we scanned the distance between the alkenyl radical and the sulfur atom, starting from the proposed intermediate **IntO\_S**. The potential energy was found to decrease as the carbon atom of the alkenyl radical approached the sulfur atom, indicating that a transition state for this C-S bond formation step cannot be located on the potential energy surface.

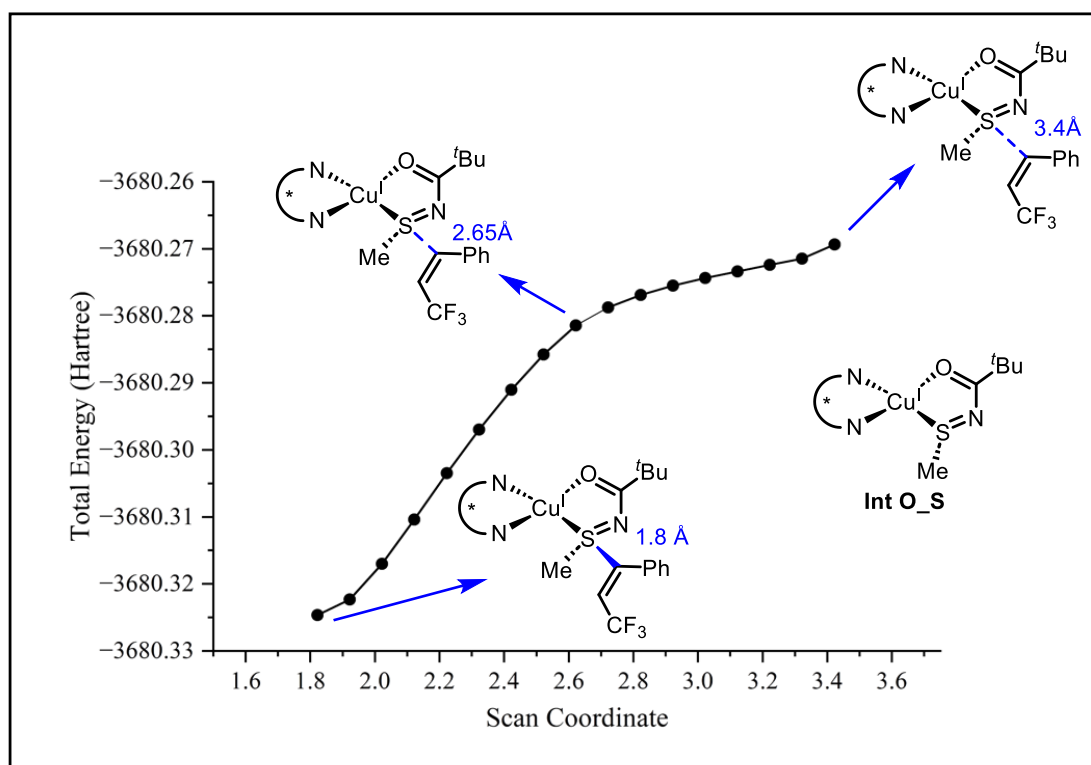

**Figure S7.** Electronic energy profile

We then considered a concerted hydrogen-atom transfer (HAT) and radical coupling (RC) process, and the energy profiles were given in **Figure S8**. The combination of **Int3** and **3k** leads to generation of intermediates: **FavInt4** and **DisfInt4**, which is endergonic by 3.6 kcal/mol and 4.6 kcal/mol, respectively. **Int4** subsequently undergoes concerted hydrogen atom transfer reaction (HAT) and radical coupling reaction (RC) to yield **Int5**. Among the pathways examined, the blue path via the transition states <sup>OSS</sup>**FavTS<sub>HAT\_RC-2</sub>** exhibits the lowest energy barrier of 15.5 kcal/mol.

Under the Curtin-Hammett assumption, the copper species with different coordination

modes are in rapid equilibrium before the insertion step. The Gibbs energies of the intermediates **Int5** were much lower than the corresponding transition states, hence the reverse reactions were considered unlikely under the reaction conditions and the enantioselectivities of the products were mainly determined by this step. The enantioselectivity was rationalized using the Curtin-Hammett principle, with the enantiomeric excess (ee) calculated as:

$$ee_{calc} = \frac{\exp(-\Delta\Delta G^\ddagger/RT) - 1}{\exp(-\Delta\Delta G^\ddagger/RT) + 1} = \frac{\exp(-(G_{Fav}^\ddagger - G_{Disf}^\ddagger)/RT) - 1}{\exp(-(G_{Fav}^\ddagger - G_{Disf}^\ddagger)/RT) + 1}$$

$G_{Fav}^\ddagger$  and  $G_{Disf}^\ddagger$  correspond to the relative Gibbs energies of the lowest-energy transition states that produce the different enantiomers. **Figure S9** shows the relative energies of the competing transition states. With  $\Delta\Delta G^\ddagger = 1.8 \text{ kcal/mol}$ , the calculated  $er_{calc} = 96:4$ , which is consistent with the experimental value ( $er_{exp} = 97.5:2.5$ ).

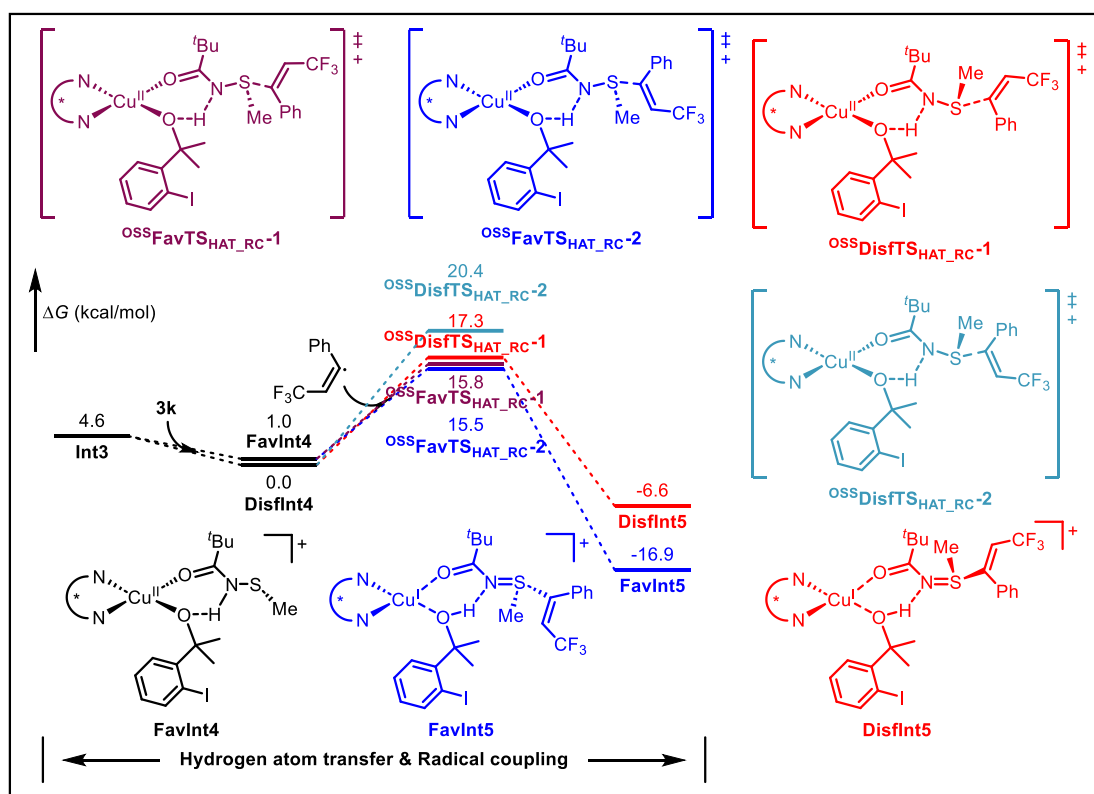

**Figure S8.** The energy profile of the hydrogen atom transfer and radical coupling

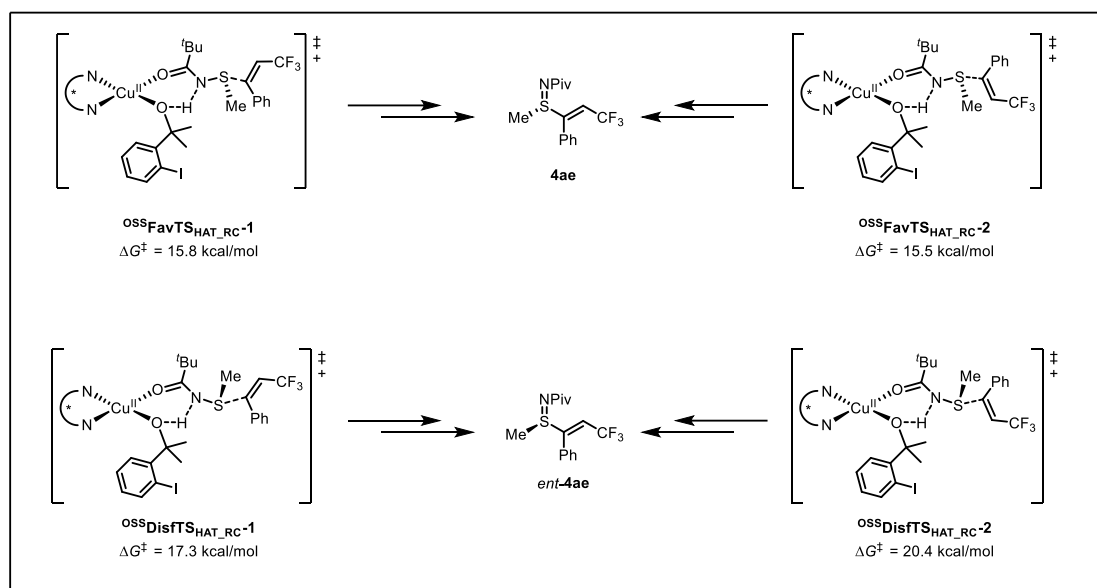

**Figure S9.** The relative energies of the competing transition states

In addition, Mulliken spin population analysis of **FavInt4** reveals a spin density of 0.00 on the N3 (the nitrogen of the sulfenamide **3k** portion), indicating that no nitrogen radical is generated in the sulfenamide (**3k**) portion of intermediate **FavInt4** (**Figure S10**).

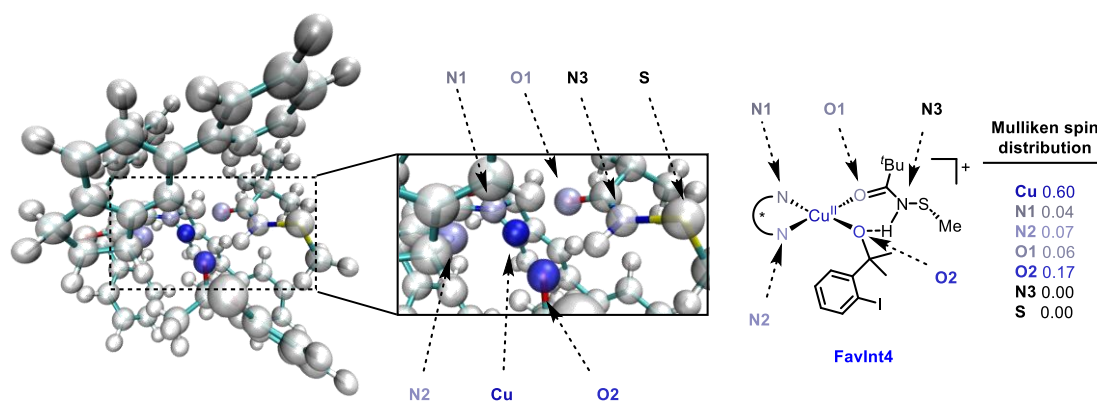

**Figure S10.** Mulliken spin density distribution of **FavInt4**

Furthermore, analysis of transition state <sup>OSS</sup>FavTSHAT\_RC-2 shows spin densities of -0.47 on the copper center, 0.07 on the sulfenamide S atom, and -0.39 on the alkenyl radical C1 position. These results suggest that C–S bond formation occurs via a HAT-induced concerted radical–radical coupling, and that the radical coupling step follows an outer-sphere pathway (i.e., the two radical centers couple directly without direct

metal coordination) (**Figure S11**).

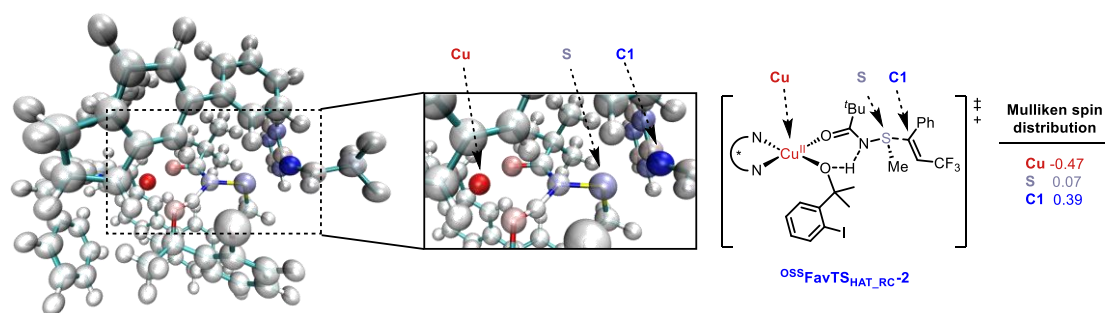

**Figure S11.** Mulliken spin density distribution of OSSFavTSHAT\_RC-2

According to the mechanism studies and the DFT calculations, a proposed catalytic cycle was given (**Figure S12**).

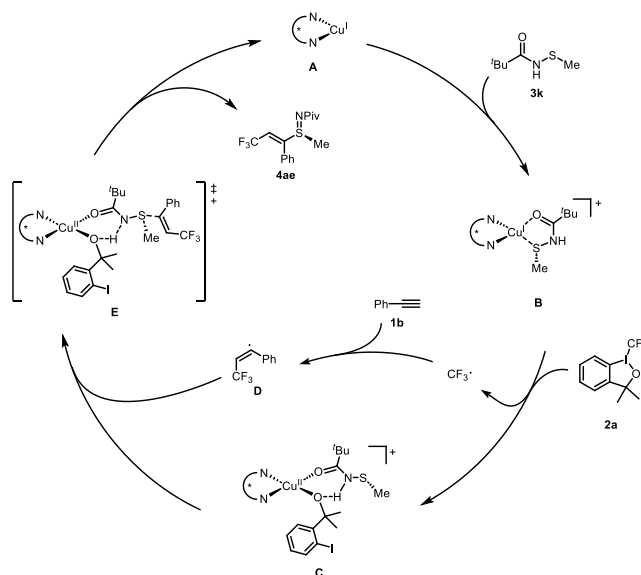

**Figure S12.** Proposed catalytic cycle

Cartesian coordinates and visualization

| Name<br>(in manuscript) | Name<br>(in SI)               | Electronic Energy (a.u.) | Gibbs Energy (a.u.) | Relative Gibbs Energy (kcal/mol) |
|-------------------------|-------------------------------|--------------------------|---------------------|----------------------------------|
| 3k                      | 3k                            | -764.2581960             | -764.1090204        |                                  |
| 2a                      | 2a                            | -1058.9890040            | -1058.8514767       |                                  |
|                         | MeCN                          | -3845.2442490            | -3844.5546040       |                                  |
|                         | CF <sub>3</sub> ·             | -337.3903380             | -337.4025837        |                                  |
|                         | Alkene_radical                | -645.6137041             | -645.5276682        |                                  |
| CuL*2MeCN               | CuL*2MeCN                     | -3977.9124909            | -3977.1791540       | 1.4                              |
| CuL*MeCN                | CuL*MeCN                      | -3845.2442490            | -3844.5546040       | -2.6                             |
| Int1                    | Int1                          | -4476.8529318            | -4476.0287661       | 0.0                              |
| Int2                    | Int2                          | -4771.5841802            | -4770.7685196       | 1.7                              |
| <sup>TS</sup> SET       | <sup>OSS</sup> TSSET          | -4771.5547753            | -4770.7436057       | 17.3                             |
| Int3                    | Int3                          | -4434.1649077            | -4433.3613094       | 4.6                              |
| FavInt4                 | FavInt4                       | -5198.4579108            | -5197.4760510       | 1.0                              |
| DisfInt4                | DisfInt4                      | -5198.4598688            | -5197.4777328       | 0.0                              |
|                         | <sup>OSS</sup> FavTSHAT_RC-1  | -5844.0728403            | -5842.9800952       | 15.8                             |
| FavTSHAT_RC             | <sup>OSS</sup> FavTSHAT_RC-2  | -5844.0720440            | -5842.9805477       | 15.5                             |
| DisfTSHAT_RC            | <sup>OSS</sup> DisfTSHAT_RC-1 | -5844.0659480            | -5842.9778307       | 17.3                             |
|                         | <sup>OSS</sup> DisfTSHAT_RC-2 | -5844.0642992            | -5842.9728027       | 20.4                             |
| FavInt5                 | FavInt5                       | -5844.1282555            | -5843.0323204       | -16.9                            |
| DisfInt5                | DisfInt5                      | -5844.1094110            | -5843.0158148       | -6.6                             |

Table S7. Electronic energy and Gibbs energy of transition states and intermediates

**3k**

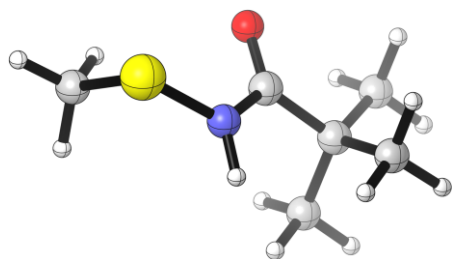

**2a**

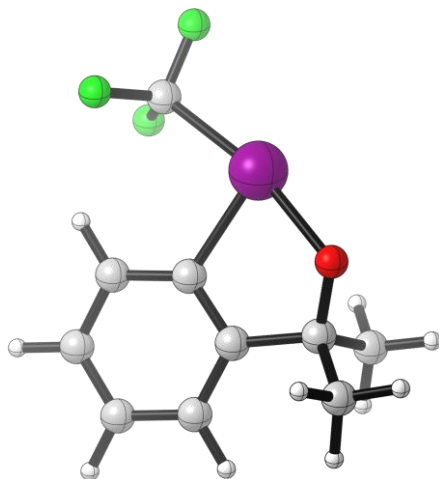

**MeCN**

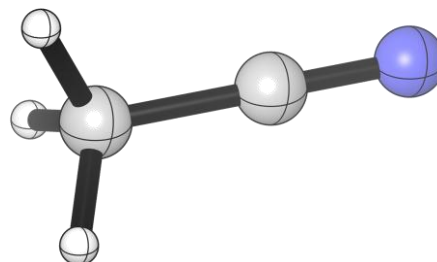

**CuL\*2MeCN**

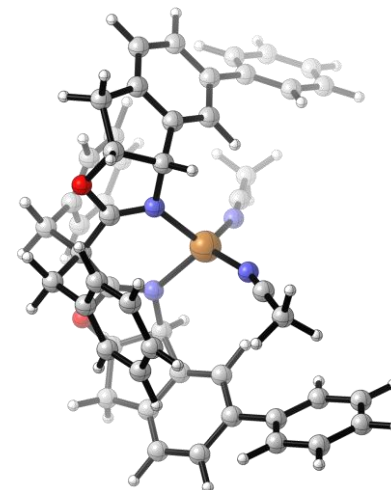

**CuL\*MeCN**

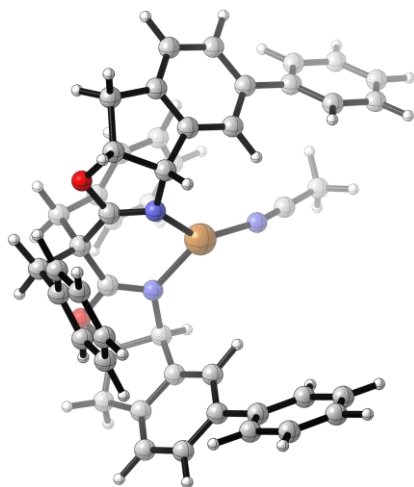

**Int1**

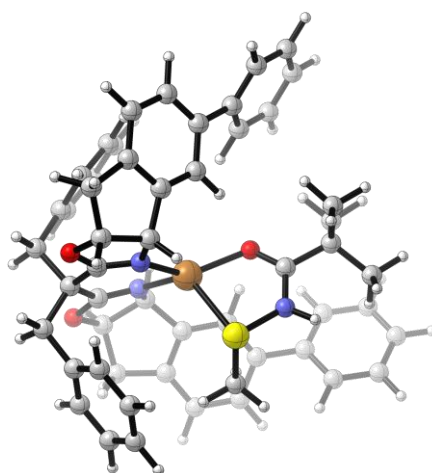

**Int2**

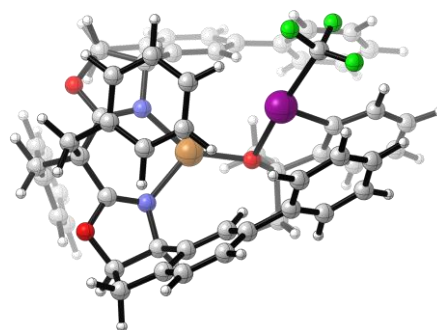

**OS<sup>TS</sup>SET**

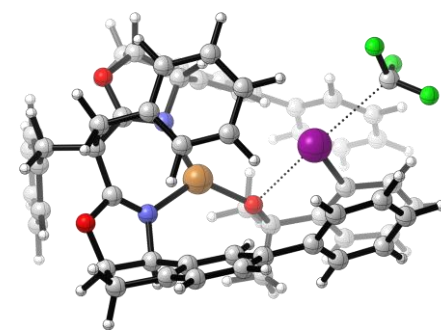

**CF<sub>3</sub> radical**

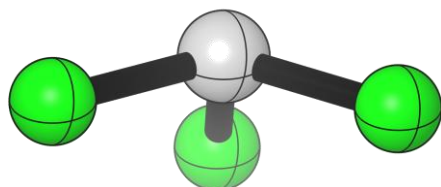

**Int3**

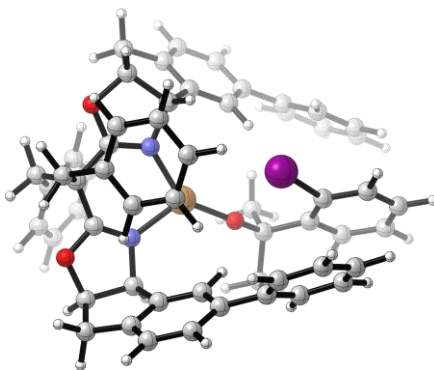

**FavInt4**

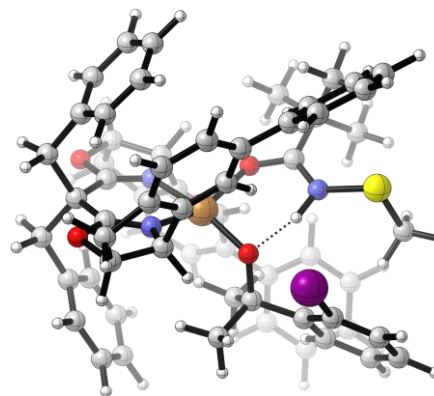

**DisfInt4**

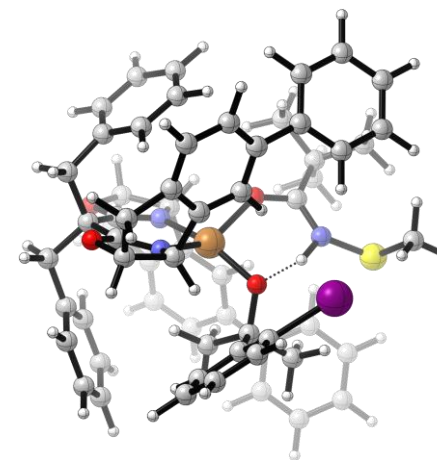

**Alkene\_radical**

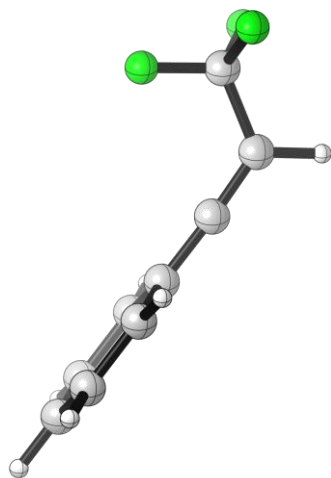

**<sup>OSS</sup>FavT<sub>SHAT\_RC-1</sub>**

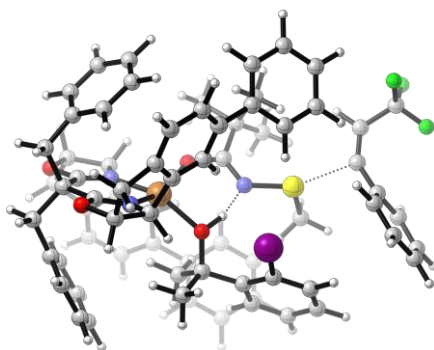

**<sup>OSS</sup>FavT<sub>SHAT\_RC-2</sub>**

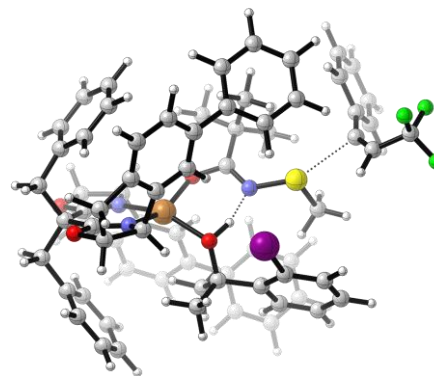

**<sup>OSS</sup>DisfT<sub>SHAT\_RC-1</sub>**

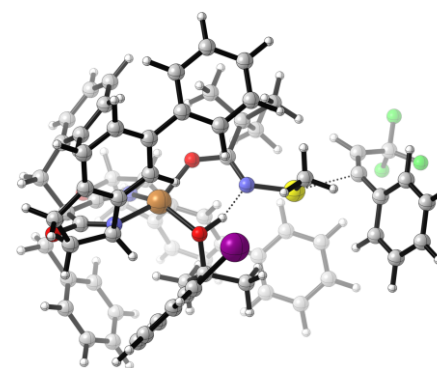

**OSSDisfT<sub>SHAT\_RC-2</sub>**

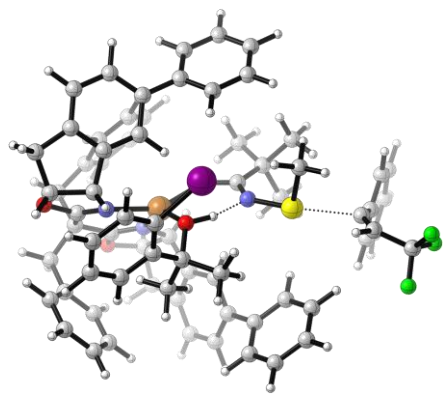

**FavInt5**

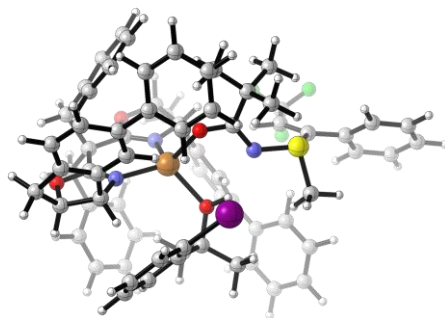

**DisfInt5**

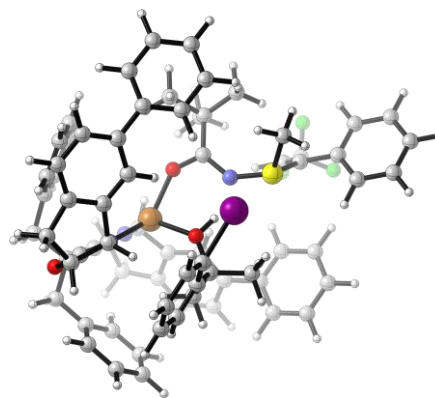

***Cartesian Coordinates***

**3k**

|   |             |             |             |
|---|-------------|-------------|-------------|
| C | -0.22251300 | -0.29168800 | 0.32576700  |
| O | 0.09315900  | -1.34927200 | 0.84339400  |
| N | 0.70754900  | 0.69543700  | 0.04736500  |
| H | 0.42444100  | 1.50075500  | -0.49412900 |
| C | -1.67073300 | 0.04783700  | -0.09359700 |
| C | -2.12202700 | 1.36754600  | 0.56400600  |
| C | -1.73889700 | 0.16999700  | -1.63088400 |
| C | -2.58323400 | -1.09633800 | 0.36903000  |
| H | -2.03561700 | 1.31271300  | 1.65432700  |
| H | -1.53592200 | 2.22854900  | 0.22402600  |
| H | -3.17093600 | 1.56527800  | 0.31568300  |
| H | -1.38495400 | -0.74757500 | -2.11329800 |
| H | -2.77506400 | 0.34007000  | -1.94443500 |
| H | -1.13866600 | 1.00471200  | -2.01091000 |
| H | -3.61769100 | -0.88714300 | 0.07400600  |
| H | -2.27566000 | -2.04700100 | -0.07391300 |
| H | -2.54561700 | -1.21281100 | 1.45567500  |
| S | 2.37677000  | 0.55196400  | 0.40929100  |
| C | 2.88805900  | -0.71105000 | -0.80515400 |
| H | 3.95711600  | -0.88134700 | -0.64213400 |
| H | 2.33901900  | -1.63573600 | -0.61787700 |
| H | 2.72918800  | -0.36359300 | -1.82938900 |

**2a**

|   |             |             |             |
|---|-------------|-------------|-------------|
| C | 0.52029700  | 0.82366400  | -0.11901000 |
| C | 1.85976300  | 0.50451600  | -0.00061300 |
| C | 2.75552000  | 1.57903600  | 0.07741200  |
| C | 2.29902500  | 2.89507100  | 0.01478100  |
| C | 0.93668400  | 3.16400100  | -0.12379200 |
| C | 0.01763900  | 2.11320000  | -0.18770900 |
| C | 2.27839600  | -0.97882400 | 0.08288500  |
| H | 3.81713200  | 1.38143600  | 0.18618500  |
| H | 3.01024700  | 3.71397200  | 0.06934400  |
| H | 0.57992600  | 4.18752500  | -0.18716900 |
| H | -1.03710700 | 2.31736700  | -0.30432600 |
| O | 1.26629400  | -1.78086900 | -0.45205300 |
| I | -0.72491300 | -0.96835500 | -0.16428200 |
| C | 3.53742000  | -1.23852200 | -0.76048900 |
| H | 3.35723900  | -0.94850200 | -1.79942400 |
| H | 4.41189700  | -0.69690600 | -0.38325000 |
| H | 3.75803200  | -2.30946700 | -0.73309500 |
| C | 2.53263300  | -1.32741100 | 1.56607700  |
| H | 1.62712400  | -1.15903700 | 2.15944000  |
| H | 2.80127100  | -2.38572000 | 1.64284600  |
| H | 3.33846500  | -0.72233900 | 1.99730100  |
| C | -2.61387700 | 0.32789300  | 0.13866500  |
| F | -3.62106900 | -0.55926300 | 0.27730000  |
| F | -2.92052200 | 1.13121000  | -0.90482900 |
| F | -2.58231800 | 1.09646300  | 1.24378000  |

**MeCN**

|   |             |             |             |
|---|-------------|-------------|-------------|
| C | 0.00000000  | 0.00000000  | 0.28035500  |
| C | 0.00000000  | 0.00000000  | -1.18073600 |
| H | 0.00000000  | 1.02666800  | -1.56029000 |
| H | 0.88912100  | -0.51333400 | -1.56029000 |
| H | -0.88912100 | -0.51333400 | -1.56029000 |
| N | 0.00000000  | 0.00000000  | 1.44045100  |

**CF3 •**

|   |             |             |             |
|---|-------------|-------------|-------------|
| C | 0.00000000  | 0.00000000  | 0.32922500  |
| F | 0.00000000  | 1.26431500  | -0.07316100 |
| F | -1.09492900 | -0.63215700 | -0.07316100 |
| F | 1.09492900  | -0.63215700 | -0.07316100 |

**Alkene\_radical**

|   |            |             |             |
|---|------------|-------------|-------------|
| C | 3.18242300 | 1.21344000  | 0.15547700  |
| C | 1.84210900 | 1.22868400  | -0.18736200 |
| C | 1.12947500 | 0.00000100  | -0.36887900 |
| C | 1.84211100 | -1.22868300 | -0.18737600 |
| C | 3.18242500 | -1.21344000 | 0.15546300  |
| C | 3.86500400 | 0.00000000  | 0.32948300  |
| H | 3.70889000 | 2.15380200  | 0.29182600  |
| H | 1.31134300 | 2.16543300  | -0.32048600 |
| H | 1.31134700 | -2.16543100 | -0.32051100 |
| H | 3.70889400 | -2.15380300 | 0.29180100  |

|   |             |             |             |
|---|-------------|-------------|-------------|
| H | 4.91659300  | -0.00000100 | 0.59862300  |
| C | -0.19683000 | 0.00000100  | -0.71575100 |
| C | -1.47214800 | 0.00000300  | -0.97472900 |
| H | -1.87458900 | 0.00000700  | -1.99052700 |
| C | -2.53333000 | 0.00000000  | 0.09475300  |
| F | -2.01604000 | -0.00000900 | 1.33513600  |
| F | -3.33252800 | 1.08555200  | -0.02073900 |
| F | -3.33253300 | -1.08554800 | -0.02075300 |

**CuL\*2MeCN**

|   |             |             |             |
|---|-------------|-------------|-------------|
| C | 1.49943500  | -0.51383200 | -2.50840300 |
| C | 1.63129400  | -1.92280200 | -3.15423400 |
| C | 0.62682000  | -2.01850200 | -1.11383000 |
| H | 0.98544500  | -2.09146600 | -4.01757400 |
| C | -0.00003300 | -2.82687100 | -0.00012900 |
| C | -0.62684000 | -2.01870800 | 1.11374900  |
| C | -1.63142800 | -1.92326400 | 3.15409500  |
| C | -1.49965400 | -0.51421200 | 2.50841100  |
| H | -0.98568000 | -2.09187500 | 4.01752000  |
| H | -0.95603600 | 0.21101600  | 3.12027200  |
| C | 1.12015700  | -3.72442400 | 0.63877100  |
| H | 0.63201200  | -4.41185600 | 1.33321000  |
| H | 1.56280900  | -4.31699400 | -0.16543200 |
| C | -1.12026000 | -3.72418100 | -0.63927200 |
| H | -0.63212700 | -4.41161700 | -1.33373000 |
| H | -1.56309400 | -4.31678800 | 0.16479700  |

|   |             |             |             |   |             |             |             |
|---|-------------|-------------|-------------|---|-------------|-------------|-------------|
| O | 1.14616300  | -2.80069100 | -2.09456300 | C | -5.18826300 | 2.28842900  | 0.38131800  |
| O | -1.14604900 | -2.80100800 | 2.09445500  | C | -6.23078800 | 2.12373100  | -0.54645200 |
| N | 0.73933700  | -0.75545500 | -1.26395200 | C | -4.59136400 | 3.55511500  | 0.49468500  |
| N | -0.73952900 | -0.75568800 | 1.26392200  | C | -6.66536000 | 3.19011600  | -1.33229300 |
| H | 0.95580700  | 0.21144300  | -3.12020000 | H | -6.69331200 | 1.14787900  | -0.66270200 |
| C | 3.12144300  | -2.17313500 | -3.43775400 | C | -5.02544900 | 4.62301300  | -0.29046600 |
| H | 3.41420300  | -3.17971500 | -3.12108900 | H | -3.80383800 | 3.71027600  | 1.22593200  |
| C | 3.82851000  | -1.06839100 | -2.68376100 | C | -6.06437100 | 4.44509300  | -1.20824300 |
| C | 2.92610600  | -0.11092000 | -2.21231300 | H | -7.47308800 | 3.04117900  | -2.04294200 |
| C | 3.35460500  | 0.99378200  | -1.48883300 | H | -4.56259300 | 5.59877400  | -0.17440000 |
| C | 4.72019800  | 1.15068000  | -1.20671400 | H | -6.40792800 | 5.27829800  | -1.81384000 |
| C | 5.62571800  | 0.18919300  | -1.69477200 | C | 5.18809500  | 2.28869300  | -0.38110400 |
| C | 5.19100100  | -0.91395800 | -2.43000800 | C | 4.59113100  | 3.55536400  | -0.49429200 |
| H | 2.63310400  | 1.70089100  | -1.09664100 | C | 6.23075800  | 2.12397200  | 0.54651300  |
| H | 6.68749200  | 0.32035100  | -1.51053000 | C | 5.02529300  | 4.62322400  | 0.29087300  |
| H | 5.91130400  | -1.63922700 | -2.79787500 | H | 3.80348600  | 3.71055200  | -1.22540300 |
| H | 3.31547900  | -2.10944800 | -4.51582100 | C | 6.66542000  | 3.19031900  | 1.33234800  |
| C | -3.35482100 | 0.99346100  | 1.48901000  | H | 6.69331600  | 1.14812400  | 0.66265000  |
| C | -4.72041100 | 1.15036100  | 1.20687400  | C | 6.06436800  | 4.44528500  | 1.20847100  |
| C | -5.62591800 | 0.18881300  | 1.69481900  | H | 4.56237400  | 5.59897200  | 0.17495100  |
| C | -5.19118500 | -0.91441100 | 2.42995900  | H | 7.47325200  | 3.04136200  | 2.04287400  |
| C | -3.82869200 | -1.06887600 | 2.68366800  | H | 6.40798200  | 5.27846000  | 1.81407800  |
| C | -2.92631000 | -0.11131500 | 2.21235000  | C | -3.12160500 | -2.17376400 | 3.43743400  |
| H | -2.63334000 | 1.70064400  | 1.09691600  | H | -3.31578100 | -2.11053100 | 4.51549700  |
| H | -6.68769600 | 0.31997600  | 1.51060000  | H | -3.41424400 | -3.18024300 | 3.12033500  |
| H | -5.91149700 | -1.63970900 | 2.79775300  | C | 2.17195300  | -2.90208100 | 1.34844800  |

|    |             |             |             |                 |             |             |             |
|----|-------------|-------------|-------------|-----------------|-------------|-------------|-------------|
| C  | 2.06606100  | -2.63394300 | 2.71970200  | H               | -3.01956700 | 2.51965900  | -3.70276100 |
| C  | 3.24026100  | -2.34364000 | 0.63649400  | H               | -4.09442300 | 1.58297000  | -2.62859500 |
| C  | 3.00210300  | -1.82336700 | 3.36237500  | C               | 2.22369300  | 2.02252200  | 1.82530700  |
| H  | 1.25433000  | -3.07977700 | 3.28759200  | N               | 1.33440300  | 1.72710700  | 1.14393400  |
| C  | 4.17674400  | -1.52956500 | 1.27241800  | C               | 3.35167300  | 2.38217500  | 2.66970200  |
| H  | 3.34864400  | -2.55101600 | -0.42231000 | H               | 4.09454900  | 1.58212100  | 2.63027300  |
| C  | 4.06030400  | -1.26856600 | 2.63884200  | H               | 3.81322100  | 3.30357900  | 2.30367800  |
| H  | 2.91685400  | -1.64227200 | 4.43022000  | H               | 3.01974800  | 2.52032900  | 3.70315100  |
| H  | 4.99668800  | -1.11281000 | 0.69760800  |                 |             |             |             |
| H  | 4.80732200  | -0.66234700 | 3.14460400  |                 |             |             |             |
| C  | -2.17182100 | -2.90160300 | -1.34902400 | <b>CuL*MeCN</b> |             |             |             |
| C  | -3.24010800 | -2.34301000 | -0.63717000 | C               | 1.89955600  | -0.17344000 | -2.54287200 |
| C  | -2.06572300 | -2.63341900 | -2.72025500 | C               | 2.47523300  | -1.48708800 | -3.13949900 |
| C  | -4.17637900 | -1.52873100 | -1.27315900 | C               | 1.27217600  | -1.87428600 | -1.24537700 |
| H  | -3.34864700 | -2.55043400 | 0.42160300  | H               | 2.00767600  | -1.81953900 | -4.06786800 |
| C  | -3.00154500 | -1.82263900 | -3.36299400 | C               | 0.69281400  | -2.81054300 | -0.21140400 |
| H  | -1.25400800 | -3.07937800 | -3.28806600 | C               | -0.03726400 | -2.12447900 | 0.92527400  |
| C  | -4.05972200 | -1.26767500 | -2.63954900 | C               | -1.05819700 | -2.22509800 | 2.95404200  |
| H  | -4.99631100 | -1.11185800 | -0.69841800 | C               | -1.10963300 | -0.78428100 | 2.36679900  |
| H  | -2.91613800 | -1.64147800 | -4.43081500 | H               | -0.41818100 | -2.33419400 | 3.82986300  |
| H  | -4.80657300 | -0.66129000 | -3.14536200 | H               | -0.62294400 | -0.03060200 | 2.99135600  |
| Cu | -0.00030800 | 0.71405000  | 0.00035700  | C               | 1.85442700  | -3.65481100 | 0.42142100  |
| C  | -2.22314900 | 2.02334800  | -1.82465600 | H               | 1.39885600  | -4.46962300 | 0.98782300  |
| N  | -1.33386600 | 1.72824300  | -1.14312700 | H               | 2.42700100  | -4.09524700 | -0.39769400 |
| C  | -3.35122100 | 2.38267100  | -2.66906800 | C               | -0.33774100 | -3.73876800 | -0.96196100 |
| H  | -3.81224600 | 3.30465500  | -2.30384300 | H               | 0.22518100  | -4.31517800 | -1.70111700 |
|    |             |             |             | H               | -0.74172200 | -4.43815700 | -0.22538600 |

|   |             |             |             |   |             |             |             |
|---|-------------|-------------|-------------|---|-------------|-------------|-------------|
| O | 2.11142400  | -2.47317800 | -2.11709100 | C | -5.17728400 | 1.78876700  | 0.66876300  |
| O | -0.42062800 | -2.98742300 | 1.88567300  | C | -6.21845600 | 1.62524300  | -0.26109700 |
| N | 1.02837100  | -0.63307600 | -1.44217300 | C | -4.76252800 | 3.09428000  | 0.98183400  |
| N | -0.36048000 | -0.89317900 | 1.08910900  | C | -6.83464300 | 2.73136000  | -0.84762600 |
| H | 1.31295000  | 0.42132200  | -3.24810200 | H | -6.54200100 | 0.62409200  | -0.53084500 |
| C | 3.99976500  | -1.32939100 | -3.22786700 | C | -5.37968700 | 4.20037700  | 0.39757500  |
| H | 4.50832600  | -2.24763400 | -2.91650800 | H | -3.98083000 | 3.24252800  | 1.72093200  |
| C | 4.28944800  | -0.13943700 | -2.33918500 | C | -6.41985600 | 4.02418400  | -0.51775800 |
| C | 3.11658000  | 0.53781600  | -1.99406100 | H | -7.64192400 | 2.58304500  | -1.55893700 |
| C | 3.13586000  | 1.64116800  | -1.15072200 | H | -5.06103500 | 5.20150800  | 0.67367000  |
| C | 4.35850500  | 2.09773300  | -0.63381900 | H | -6.90813400 | 4.88519900  | -0.96399400 |
| C | 5.53869100  | 1.42449300  | -1.00559200 | C | 4.39853100  | 3.24230400  | 0.30494700  |
| C | 5.51336400  | 0.31278800  | -1.84781700 | C | 3.54927000  | 4.34657700  | 0.12927200  |
| H | 2.20805700  | 2.11793400  | -0.84728500 | C | 5.27791200  | 3.24127100  | 1.39941900  |
| H | 6.49118100  | 1.78974100  | -0.63462600 | C | 3.57847200  | 5.41713100  | 1.02098700  |
| H | 6.43908500  | -0.19138800 | -2.11055200 | H | 2.88682400  | 4.37884000  | -0.73125300 |
| H | 4.29256100  | -1.13934000 | -4.26840100 | C | 5.30722000  | 4.31157900  | 2.29126300  |
| C | -3.15986600 | 0.59539800  | 1.55835100  | H | 5.92574600  | 2.38526200  | 1.56470200  |
| C | -4.54148900 | 0.61474400  | 1.31200000  | C | 4.45732000  | 5.40341800  | 2.10573600  |
| C | -5.30824000 | -0.50646300 | 1.68191200  | H | 2.92410400  | 6.26931300  | 0.86138800  |
| C | -4.72522700 | -1.62146500 | 2.28531000  | H | 5.99045000  | 4.29048900  | 3.13525400  |
| C | -3.34985600 | -1.63090100 | 2.51341000  | H | 4.48234000  | 6.23872100  | 2.79906900  |
| C | -2.57968400 | -0.52728400 | 2.13509700  | C | -2.50554700 | -2.69989000 | 3.17160600  |
| H | -2.54602900 | 1.43911500  | 1.26417200  | H | -2.72513900 | -2.77352400 | 4.24363800  |
| H | -6.38202500 | -0.48838900 | 1.52393300  | H | -2.65131000 | -3.69960700 | 2.74869200  |
| H | -5.34396000 | -2.46432800 | 2.57979100  | C | 2.72933300  | -2.80748400 | 1.32152400  |

|    |             |             |             |             |             |             |             |
|----|-------------|-------------|-------------|-------------|-------------|-------------|-------------|
| C  | 2.56929600  | -2.85127700 | 2.71271000  | H           | -4.45886700 | 2.58104800  | -2.14596000 |
| C  | 3.65530800  | -1.90513700 | 0.78185100  | H           | -3.55339900 | 4.08682700  | -1.93591000 |
| C  | 3.29650400  | -1.99607300 | 3.54194400  |             |             |             |             |
| H  | 1.87284800  | -3.56348800 | 3.14587900  | <b>Int1</b> |             |             |             |
| C  | 4.37685100  | -1.04293200 | 1.60623600  | C           | -0.88255900 | -1.57964600 | 2.36254100  |
| H  | 3.82043600  | -1.87243300 | -0.28847600 | C           | -0.76471700 | -3.04641900 | 2.85720500  |
| C  | 4.19352400  | -1.08021900 | 2.98947800  | C           | 0.75365500  | -2.61347600 | 1.23423000  |
| H  | 3.16647900  | -2.04943000 | 4.61915800  | H           | -0.55143400 | -3.14515000 | 3.92074100  |
| H  | 5.07958300  | -0.34657500 | 1.16080300  | C           | 2.01488500  | -2.96768900 | 0.47309400  |
| H  | 4.75457900  | -0.40925800 | 3.63313600  | C           | 2.37717400  | -2.01485800 | -0.64375000 |
| C  | -1.43527900 | -2.93355600 | -1.61642200 | C           | 3.72742700  | -1.39106500 | -2.37141300 |
| C  | -2.55342200 | -2.52604200 | -0.87847700 | C           | 2.56028100  | -0.38748500 | -2.15534900 |
| C  | -1.30438200 | -2.48548500 | -2.93730300 | H           | 3.65614300  | -1.99393000 | -3.27853900 |
| C  | -3.50335200 | -1.66763400 | -1.43149800 | H           | 1.94237500  | -0.21830400 | -3.04233800 |
| H  | -2.68272300 | -2.87598500 | 0.14012000  | C           | 1.88701500  | -4.40364000 | -0.13661600 |
| C  | -2.25479800 | -1.63242000 | -3.49868500 | H           | 2.82775200  | -4.62596100 | -0.64719600 |
| H  | -0.45252900 | -2.81128300 | -3.52912100 | H           | 1.78472100  | -5.10670500 | 0.69275600  |
| C  | -3.35153700 | -1.21280800 | -2.74228600 | C           | 3.17968100  | -2.92844600 | 1.54077200  |
| H  | -4.35482000 | -1.36005700 | -0.83408500 | H           | 3.01072600  | -3.75568400 | 2.23428600  |
| H  | -2.14341700 | -1.30320300 | -4.52788700 | H           | 4.11478600  | -3.11883400 | 1.00853400  |
| H  | -4.09507900 | -0.55228800 | -3.17991300 | O           | 0.41378800  | -3.54423800 | 2.15676400  |
| Cu | -0.44147600 | 0.37030700  | -0.48267700 | O           | 3.55372100  | -2.31449600 | -1.24817400 |
| C  | -2.43444400 | 2.33202700  | -1.69623200 | N           | 0.06548500  | -1.53251600 | 1.22505100  |
| N  | -1.58992700 | 1.72749800  | -1.18243200 | N           | 1.73650000  | -1.00900900 | -1.10179300 |
| C  | -3.50226500 | 3.07437200  | -2.34434700 | H           | -0.54912300 | -0.83172200 | 3.08892300  |
| H  | -3.32519800 | 3.12292400  | -3.42315100 | C           | -2.06265200 | -3.77266200 | 2.43022000  |

|   |             |             |             |   |             |             |             |
|---|-------------|-------------|-------------|---|-------------|-------------|-------------|
| H | -1.84570600 | -4.48712200 | 1.63056000  | H | 1.33000000  | 2.87368600  | 1.18800000  |
| C | -2.97181200 | -2.65998600 | 1.95487500  | C | 1.58104800  | 6.24428000  | 1.58910300  |
| C | -2.32022300 | -1.42312000 | 1.95227600  | H | 3.02768000  | 7.49829600  | 0.59715000  |
| C | -2.97557000 | -0.25455900 | 1.57712300  | H | 0.28015800  | 4.74326500  | 2.42705100  |
| C | -4.32010900 | -0.31999900 | 1.17387300  | H | 1.12216100  | 7.06400000  | 2.13381000  |
| C | -4.96671700 | -1.57036800 | 1.16828800  | C | -5.04124000 | 0.89835600  | 0.73620900  |
| C | -4.30578900 | -2.73588900 | 1.55775600  | C | -4.95463700 | 2.08937600  | 1.47304600  |
| H | -2.44628000 | 0.69353200  | 1.55789100  | C | -5.83695800 | 0.88046900  | -0.42063200 |
| H | -6.01194400 | -1.61874700 | 0.87868700  | C | -5.65031300 | 3.22878700  | 1.06891800  |
| H | -4.83582800 | -3.68425700 | 1.56380800  | H | -4.36300800 | 2.10945100  | 2.38382000  |
| H | -2.49888300 | -4.33885800 | 3.25990900  | C | -6.52823900 | 2.02113300  | -0.82814400 |
| C | 2.62397900  | 1.96564400  | -1.06646300 | H | -5.90645600 | -0.03265600 | -1.00520500 |
| C | 3.41460900  | 2.98703500  | -0.52028300 | C | -6.43802400 | 3.19941000  | -0.08332700 |
| C | 4.81565600  | 2.87293200  | -0.59675800 | H | -5.58439400 | 4.13733200  | 1.66017500  |
| C | 5.42599100  | 1.75037800  | -1.15880800 | H | -7.13987900 | 1.98952500  | -1.72521000 |
| C | 4.62813900  | 0.72407800  | -1.66448700 | H | -6.98224700 | 4.08553100  | -0.39544800 |
| C | 3.23783800  | 0.85633400  | -1.63233800 | C | 5.04457600  | -0.60533100 | -2.25758000 |
| H | 1.54263400  | 2.03545000  | -1.01686200 | H | 5.49380700  | -0.48556500 | -3.25148200 |
| H | 5.43200300  | 3.65478800  | -0.16340800 | H | 5.77099600  | -1.14852100 | -1.64397900 |
| H | 6.50939900  | 1.67155500  | -1.17286900 | C | 0.71114800  | -4.53297200 | -1.07846100 |
| C | 2.77803700  | 4.12151000  | 0.18755300  | C | 0.75623100  | -4.00573800 | -2.37699200 |
| C | 3.25111900  | 5.43386400  | 0.03843400  | C | -0.46672800 | -5.15902300 | -0.65409900 |
| C | 1.69379900  | 3.88732900  | 1.05067900  | C | -0.35310100 | -4.08169400 | -3.21879700 |
| C | 2.65487900  | 6.48703000  | 0.73045000  | H | 1.67419000  | -3.55632200 | -2.74239300 |
| H | 4.07722700  | 5.62998900  | -0.63905400 | C | -1.57959300 | -5.24196600 | -1.49278800 |
| C | 1.10493400  | 4.94131900  | 1.74817000  | H | -0.49887400 | -5.60352100 | 0.33585800  |

|    |             |             |             |             |             |             |             |
|----|-------------|-------------|-------------|-------------|-------------|-------------|-------------|
| C  | -1.52730300 | -4.69812100 | -2.77755700 | H           | -1.22241900 | 3.91539000  | 0.62840100  |
| H  | -0.29511600 | -3.67842900 | -4.22567700 | H           | -2.33293200 | 5.13345800  | -0.02239000 |
| H  | -2.47903300 | -5.74475000 | -1.14926300 | H           | -2.96789400 | 3.58000300  | 0.54850700  |
| H  | -2.38577200 | -4.77316700 | -3.43870900 | C           | -3.23985500 | 3.71040000  | -2.19274000 |
| C  | 3.21305400  | -1.60952200 | 2.27768100  | H           | -4.07641200 | 3.12916000  | -1.79237400 |
| C  | 3.79957200  | -0.47898300 | 1.69726800  | H           | -3.51929300 | 4.76707700  | -2.14533100 |
| C  | 2.55938500  | -1.47048200 | 3.50923400  | H           | -3.11120200 | 3.47546000  | -3.25770900 |
| C  | 3.70314800  | 0.76968900  | 2.31142900  | C           | -2.90321300 | -1.41279700 | -1.86585600 |
| H  | 4.33213600  | -0.56815900 | 0.75665100  | H           | -3.75109900 | -1.26768000 | -2.53913900 |
| C  | 2.46252000  | -0.22404500 | 4.12860700  | H           | -2.58109000 | -2.45726700 | -1.90170300 |
| H  | 2.12248200  | -2.34634500 | 3.98198600  | H           | -3.15987100 | -1.14128200 | -0.84509100 |
| C  | 3.02313200  | 0.90291100  | 3.52307400  | H           | -2.60142600 | 1.54839600  | -2.96318900 |
| H  | 4.15910900  | 1.63345400  | 1.84085800  |             |             |             |             |
| H  | 1.95949100  | -0.13461700 | 5.08750600  | <b>Int2</b> |             |             |             |
| H  | 2.94663200  | 1.87592600  | 3.99920300  | C           | -2.58476100 | -2.12805800 | -2.09132700 |
| Cu | 0.01143900  | -0.23961700 | -0.31560700 | C           | -3.99375200 | -2.77905200 | -1.97720200 |
| N  | -2.01499100 | 1.16958700  | -2.23129100 | C           | -3.69445100 | -1.14116100 | -0.42421200 |
| S  | -1.45973000 | -0.45429600 | -2.43069300 | H           | -4.67540300 | -2.54787600 | -2.79762900 |
| C  | -1.55439000 | 2.02151300  | -1.26993300 | C           | -4.18138100 | -0.37975400 | 0.78874400  |
| O  | -0.77987600 | 1.64167800  | -0.37571000 | C           | -3.30472900 | 0.77297700  | 1.22007400  |
| C  | -1.95055400 | 3.49635000  | -1.38063800 | C           | -2.90856200 | 2.61388700  | 2.46067800  |
| C  | -0.75952600 | 4.20579300  | -2.07116200 | C           | -1.58133600 | 1.97976800  | 1.98644200  |
| H  | -0.99039800 | 5.27037200  | -2.18049500 | H           | -2.98644100 | 2.74804900  | 3.53868300  |
| H  | 0.15147300  | 4.11602500  | -1.47302900 | H           | -1.02228100 | 1.45552700  | 2.76797300  |
| H  | -0.57041200 | 3.79580300  | -3.07004400 | C           | -4.16628000 | -1.39111400 | 2.01686700  |
| C  | -2.12838100 | 4.05977000  | 0.03952100  | H           | -4.77436600 | -0.93888600 | 2.80470000  |

|   |             |             |             |   |             |             |             |
|---|-------------|-------------|-------------|---|-------------|-------------|-------------|
| H | -4.67071100 | -2.30240500 | 1.68560400  | C | -0.82637800 | 3.11154800  | 1.36428500  |
| C | -5.64453800 | 0.10456300  | 0.52887100  | H | 1.11933200  | 2.24455000  | 1.13159800  |
| H | -6.24208200 | -0.77838000 | 0.28977300  | H | 0.62768200  | 6.28982800  | -0.23460900 |
| H | -6.02507800 | 0.51831900  | 1.46465500  | H | -1.74193200 | 6.25577200  | 0.45052000  |
| O | -4.54029300 | -2.13373400 | -0.78678800 | C | 2.45717800  | 4.24866900  | -0.07617100 |
| O | -3.90179500 | 1.60955100  | 2.09751700  | C | 2.83148400  | 4.88841700  | -1.26842100 |
| N | -2.61714900 | -1.01826100 | -1.10529000 | C | 3.43312100  | 3.52377800  | 0.62768200  |
| N | -2.04567500 | 0.93990000  | 1.02989600  | C | 4.13881100  | 4.80188400  | -1.74364800 |
| H | -2.35704600 | -1.72112000 | -3.08002900 | H | 2.08472000  | 5.42899400  | -1.84226300 |
| C | -3.80346000 | -4.28406000 | -1.73280100 | C | 4.73854300  | 3.43592900  | 0.15188100  |
| H | -4.47852700 | -4.63892900 | -0.94730800 | H | 3.17392300  | 3.04100800  | 1.56467300  |
| C | -2.33770900 | -4.41261400 | -1.38368500 | C | 5.09648100  | 4.07235100  | -1.03755700 |
| C | -1.64248800 | -3.22936800 | -1.65294300 | H | 4.40720700  | 5.29801100  | -2.67184300 |
| C | -0.27680800 | -3.12659700 | -1.42213200 | H | 5.47514900  | 2.86987100  | 0.71330000  |
| C | 0.41848700  | -4.22313000 | -0.88900600 | H | 6.11346000  | 4.00073800  | -1.41078000 |
| C | -0.28631100 | -5.40611800 | -0.60429700 | C | 1.86379100  | -4.08112000 | -0.59245900 |
| C | -1.65578900 | -5.50921900 | -0.85560300 | C | 2.71565300  | -3.44434700 | -1.50866200 |
| H | 0.23988200  | -2.18697600 | -1.57856900 | C | 2.40114700  | -4.51882800 | 0.62843700  |
| H | 0.24999800  | -6.25915900 | -0.19943300 | C | 4.06103400  | -3.23780100 | -1.21122500 |
| H | -2.17930100 | -6.43595600 | -0.63838000 | H | 2.31863000  | -3.12762400 | -2.46754000 |
| H | -4.04822900 | -4.84603800 | -2.64286800 | C | 3.74443800  | -4.30016600 | 0.93365200  |
| C | 0.50705000  | 3.12670400  | 0.99215600  | H | 1.75678700  | -5.01234500 | 1.35083200  |
| C | 1.05140500  | 4.27113400  | 0.38940300  | C | 4.57820200  | -3.65666200 | 0.01606900  |
| C | 0.21376100  | 5.38610700  | 0.20187000  | H | 4.70310400  | -2.74582500 | -1.93527000 |
| C | -1.12789400 | 5.37113300  | 0.59401100  | H | 4.14096800  | -4.63216900 | 1.88865600  |
| C | -1.65592800 | 4.22055400  | 1.17778100  | H | 5.62419900  | -3.49042100 | 0.25440000  |

|    |             |             |             |   |             |             |             |
|----|-------------|-------------|-------------|---|-------------|-------------|-------------|
| C  | -3.06126300 | 3.93992000  | 1.67137900  | C | 3.54391600  | 0.16134600  | -0.91728900 |
| H  | -3.46736800 | 4.74369500  | 2.29352100  | C | 2.90110800  | 0.56619100  | -2.07498500 |
| H  | -3.75338300 | 3.79280300  | 0.83427800  | C | 3.73377500  | 1.02326400  | -3.10895700 |
| C  | -2.77234900 | -1.67193900 | 2.52662000  | C | 5.11903300  | 1.02869400  | -2.97776000 |
| C  | -2.28194200 | -0.97811100 | 3.64114800  | C | 5.71600200  | 0.56816200  | -1.80376500 |
| C  | -1.91010200 | -2.53799300 | 1.84338000  | C | 4.92101700  | 0.12842400  | -0.74622900 |
| C  | -0.95257400 | -1.11337700 | 4.04227600  | C | 1.37481300  | 0.49404300  | -2.25135000 |
| H  | -2.94689000 | -0.31593300 | 4.19016200  | H | 3.28207300  | 1.37217700  | -4.03170900 |
| C  | -0.57730900 | -2.67031400 | 2.23588200  | H | 5.73455500  | 1.38400800  | -3.79791600 |
| H  | -2.26990200 | -3.10977900 | 0.99557300  | H | 6.79630100  | 0.55147900  | -1.70067600 |
| C  | -0.09047700 | -1.95053600 | 3.32944100  | H | 5.38015900  | -0.23506800 | 0.16156900  |
| H  | -0.59258600 | -0.57318200 | 4.91339300  | O | 0.82248400  | -0.17994000 | -1.13389800 |
| H  | 0.07574200  | -3.33728600 | 1.68559500  | I | 2.21436800  | -0.48620100 | 0.67136700  |
| H  | 0.94609000  | -2.05608900 | 3.63662400  | C | 0.79120100  | 1.90890000  | -2.36990400 |
| C  | -5.73654000 | 1.13738600  | -0.57239800 | H | 0.98004700  | 2.47797700  | -1.46156800 |
| C  | -5.85760600 | 2.49693200  | -0.25846000 | H | 1.22501500  | 2.45493800  | -3.21375500 |
| C  | -5.67648300 | 0.76555700  | -1.92237900 | H | -0.29260700 | 1.84158500  | -2.52220000 |
| C  | -5.88805500 | 3.46406400  | -1.26422500 | C | 1.03530700  | -0.32616800 | -3.50907900 |
| H  | -5.93762000 | 2.79409400  | 0.78247000  | H | 1.48765900  | -1.31927600 | -3.45860700 |
| C  | -5.70256700 | 1.72937200  | -2.93030600 | H | -0.05214500 | -0.43846200 | -3.57089200 |
| H  | -5.63409000 | -0.28650100 | -2.18668600 | H | 1.37882200  | 0.16644300  | -4.42371600 |
| C  | -5.79939100 | 3.08337700  | -2.60394500 | C | 3.83302100  | -0.44309700 | 2.24998800  |
| H  | -5.99258500 | 4.51291300  | -1.00141700 | F | 3.19310800  | -0.69309600 | 3.40306300  |
| H  | -5.66223900 | 1.42228200  | -3.97144100 | F | 4.40738000  | 0.76550900  | 2.33036600  |
| H  | -5.82547100 | 3.83363200  | -3.38840200 | F | 4.79480900  | -1.35842900 | 2.09088200  |
| Cu | -0.98135000 | 0.08466700  | -0.41831000 |   |             |             |             |

OSSTSET

|   |             |             |             |   |             |             |             |
|---|-------------|-------------|-------------|---|-------------|-------------|-------------|
| C | -2.74542500 | -2.05215900 | -2.05912100 | C | -0.47562800 | -3.16529300 | -1.42398700 |
| C | -4.18201600 | -2.63471600 | -1.92864400 | C | 0.17203600  | -4.30037400 | -0.91079000 |
| C | -3.79262900 | -1.03490800 | -0.35473000 | C | -0.58940600 | -5.44987100 | -0.63160600 |
| H | -4.86697000 | -2.35695000 | -2.73117700 | C | -1.96518300 | -5.48302300 | -0.86413600 |
| C | -4.20188600 | -0.27328900 | 0.88377900  | H | 0.08914300  | -2.25384600 | -1.58131700 |
| C | -3.24960700 | 0.82503200  | 1.29375900  | H | -0.09113300 | -6.33377100 | -0.24525700 |
| C | -2.67110000 | 2.58761700  | 2.57607700  | H | -2.53055200 | -6.38581200 | -0.65115300 |
| C | -1.41283400 | 1.93059300  | 1.96370400  | H | -4.34140200 | -4.68570600 | -2.61713500 |
| H | -2.65732900 | 2.66059500  | 3.66235500  | C | 0.63499200  | 3.05137800  | 0.85886500  |
| H | -0.81585700 | 1.34514500  | 2.66944600  | C | 1.17380000  | 4.20883200  | 0.27470000  |
| C | -4.18705300 | -1.30589300 | 2.09597600  | C | 0.36677200  | 5.35988600  | 0.20951700  |
| H | -4.77535600 | -0.85338600 | 2.89819400  | C | -0.93952100 | 5.37158600  | 0.70690900  |
| H | -4.71458900 | -2.20185100 | 1.75870600  | C | -1.46364100 | 4.21102600  | 1.27358200  |
| C | -5.64513600 | 0.28974300  | 0.68175300  | C | -0.66611600 | 3.06471100  | 1.33444500  |
| H | -6.29599600 | -0.55558100 | 0.44494200  | H | 1.22414800  | 2.14332300  | 0.90823600  |
| H | -5.97251900 | 0.70150100  | 1.63842300  | H | 0.78092500  | 6.27054100  | -0.21204200 |
| O | -4.68005300 | -1.97775100 | -0.71696800 | H | -1.52742400 | 6.28392700  | 0.65951200  |
| O | -3.73707800 | 1.64274000  | 2.24325000  | C | 2.54217400  | 4.16858800  | -0.28996800 |
| N | -2.72637400 | -0.94878000 | -1.06337100 | C | 2.85362200  | 4.85229500  | -1.47572500 |
| N | -2.00443200 | 0.95746800  | 1.00375700  | C | 3.54123100  | 3.39037100  | 0.31720000  |
| H | -2.51334900 | -1.64519600 | -3.04643200 | C | 4.12463900  | 4.75531400  | -2.03960400 |
| C | -4.06053900 | -4.14828200 | -1.70271100 | H | 2.08601900  | 5.43684400  | -1.97443300 |
| H | -4.74488900 | -4.47989300 | -0.91508600 | C | 4.81059200  | 3.29442100  | -0.24565900 |
| C | -2.59906200 | -4.34845300 | -1.37045000 | H | 3.33150700  | 2.87049400  | 1.24595600  |
| C | -1.84863900 | -3.19860500 | -1.63803300 | C | 5.10635300  | 3.97341300  | -1.42858900 |
|   |             |             |             | H | 4.34559200  | 5.28491700  | -2.96182300 |

|   |             |             |             |    |             |             |             |
|---|-------------|-------------|-------------|----|-------------|-------------|-------------|
| H | 5.56445400  | 2.68644700  | 0.24322900  | H  | 0.92716800  | -2.08914300 | 3.65650900  |
| H | 6.09485000  | 3.89441300  | -1.87078700 | C  | -5.71088100 | 1.35137600  | -0.39347300 |
| C | 1.62590300  | -4.24034700 | -0.63019700 | C  | -5.74706700 | 2.70703700  | -0.04392200 |
| C | 2.49898500  | -3.60677200 | -1.52802500 | C  | -5.70198600 | 1.01024200  | -1.75291100 |
| C | 2.15263700  | -4.76206600 | 0.56176800  | C  | -5.74376000 | 3.69944500  | -1.02520400 |
| C | 3.85595500  | -3.48499600 | -1.23924800 | H  | -5.78903300 | 2.98189600  | 1.00550400  |
| H | 2.10955400  | -3.21965500 | -2.46439700 | C  | -5.69496900 | 1.99932000  | -2.73649500 |
| C | 3.50865900  | -4.62870700 | 0.85820400  | H  | -5.72761900 | -0.03549400 | -2.04414500 |
| H | 1.49068000  | -5.25082200 | 1.27153200  | C  | -5.70609300 | 3.34800900  | -2.37528200 |
| C | 4.36392000  | -3.98596600 | -0.03906700 | H  | -5.78224500 | 4.74550800  | -0.73517000 |
| H | 4.51384700  | -2.99051400 | -1.94689000 | H  | -5.69669000 | 1.71717800  | -3.78538500 |
| H | 3.89701700  | -5.02517100 | 1.79179500  | H  | -5.70628300 | 4.11801800  | -3.14067700 |
| H | 5.41971900  | -3.88273000 | 0.19324500  | Cu | -1.09120200 | 0.10443000  | -0.53706300 |
| C | -2.83272900 | 3.95901400  | 1.87304400  | C  | 3.36064700  | -0.03210200 | -1.01378200 |
| H | -3.14787400 | 4.74148700  | 2.57042300  | C  | 2.72079400  | 0.43254000  | -2.16437900 |
| H | -3.60051100 | 3.88616600  | 1.09446800  | C  | 3.55619000  | 0.87239100  | -3.20572400 |
| C | -2.79116300 | -1.61861300 | 2.58283400  | C  | 4.94231900  | 0.81012600  | -3.12275600 |
| C | -2.28316500 | -0.95928500 | 3.71037700  | C  | 5.54439400  | 0.28906700  | -1.97873200 |
| C | -1.94617500 | -2.47833400 | 1.86923600  | C  | 4.74989700  | -0.12790700 | -0.91482000 |
| C | -0.95314900 | -1.12637000 | 4.09862300  | C  | 1.19677100  | 0.46765600  | -2.39157200 |
| H | -2.93476600 | -0.30390000 | 4.28263300  | H  | 3.10171200  | 1.26520500  | -4.10930400 |
| C | -0.61205200 | -2.63866300 | 2.24678800  | H  | 5.54762600  | 1.15764400  | -3.95383400 |
| H | -2.32109800 | -3.02587300 | 1.01155800  | H  | 6.62477700  | 0.21412800  | -1.90369800 |
| C | -0.10899600 | -1.95604000 | 3.35703100  | H  | 5.21157600  | -0.53115600 | -0.02329800 |
| H | -0.57937900 | -0.61582300 | 4.98160700  | O  | 0.54397500  | -0.19914500 | -1.33671600 |
| H | 0.03215100  | -3.29431600 | 1.67277600  | I  | 2.26653100  | -0.63231300 | 0.73817500  |

|             |             |             |             |   |             |             |             |
|-------------|-------------|-------------|-------------|---|-------------|-------------|-------------|
| C           | 0.69798200  | 1.91172500  | -2.53250700 | H | -5.21018100 | -0.94092300 | 1.09826900  |
| H           | 0.85805600  | 2.46093800  | -1.60586800 | C | -4.92257300 | 1.76003500  | 0.05924600  |
| H           | 1.21387500  | 2.44561500  | -3.33570500 | H | -5.83815300 | 1.23412900  | -0.22159300 |
| H           | -0.37576800 | 1.90573700  | -2.75865700 | H | -5.15231400 | 2.40383300  | 0.91172100  |
| C           | 0.85187200  | -0.34464300 | -3.66314700 | O | -4.50723200 | -0.77725200 | -1.24162600 |
| H           | 1.23841400  | -1.36329700 | -3.58364700 | O | -3.11525700 | 2.15647000  | 2.24983700  |
| H           | -0.23694200 | -0.38569100 | -3.77319000 | N | -2.33839300 | -0.26782200 | -1.22014700 |
| H           | 1.26838000  | 0.12010200  | -4.56080400 | N | -1.46624200 | 1.20348500  | 1.08399400  |
| C           | 4.54563400  | -0.11857600 | 2.52747000  | H | -1.96925300 | -0.89604300 | -3.20278300 |
| F           | 4.01585900  | -0.36180700 | 3.71896800  | C | -4.30916800 | -2.94958300 | -2.38980800 |
| F           | 4.89993300  | 1.16114200  | 2.41890200  | H | -5.19512000 | -3.14329500 | -1.77652200 |
| F           | 5.59165600  | -0.91118000 | 2.30420900  | C | -3.03706100 | -3.55624700 | -1.83991300 |
| <b>Int3</b> |             |             |             | C | -1.98280500 | -2.63679800 | -1.85101500 |
| C           | -2.46382900 | -1.27366000 | -2.30474800 | C | -0.71769600 | -2.97827300 | -1.38628100 |
| C           | -4.00137200 | -1.44817000 | -2.44818400 | C | -0.48987000 | -4.27066600 | -0.88631800 |
| C           | -3.48975500 | -0.12070900 | -0.67208500 | C | -1.55471600 | -5.19100100 | -0.87850500 |
| H           | -4.44753400 | -0.92368600 | -3.29377600 | C | -2.82056200 | -4.84493300 | -1.35301000 |
| C           | -3.88365300 | 0.69024400  | 0.53692700  | H | 0.07787200  | -2.24366000 | -1.34459100 |
| C           | -2.73050100 | 1.36939500  | 1.23700000  | H | -1.38089600 | -6.19633200 | -0.50761800 |
| C           | -1.91153100 | 2.64192700  | 2.92642800  | H | -3.62444900 | -5.57539000 | -1.33889100 |
| C           | -0.76037200 | 1.89562600  | 2.19560900  | H | -4.53077200 | -3.32134900 | -3.39820200 |
| H           | -2.02624700 | 2.36379900  | 3.97282300  | C | 1.40900900  | 2.82467300  | 1.13694800  |
| H           | -0.27493900 | 1.12251800  | 2.79728700  | C | 2.13804100  | 3.95729300  | 0.74057000  |
| C           | -4.49578200 | -0.29524100 | 1.61479500  | C | 1.57548200  | 5.22794000  | 0.96679900  |
| H           | -5.04917900 | 0.31563600  | 2.33201500  | C | 0.33198300  | 5.38066800  | 1.58272300  |
|             |             |             |             | C | -0.37836000 | 4.24664600  | 1.97556000  |

|   |             |             |             |    |             |             |             |
|---|-------------|-------------|-------------|----|-------------|-------------|-------------|
| C | 0.16746300  | 2.98291900  | 1.73636400  | C  | -1.69900800 | 4.15738400  | 2.71157200  |
| H | 1.80814700  | 1.83131500  | 0.96786600  | H  | -1.66648500 | 4.68621400  | 3.67057200  |
| H | 2.14105500  | 6.11163500  | 0.68836000  | H  | -2.53843700 | 4.58254600  | 2.14941600  |
| H | -0.06061700 | 6.37624700  | 1.76994000  | C  | -3.40569500 | -1.08256600 | 2.30980100  |
| C | 3.45451800  | 3.78985100  | 0.08372100  | C  | -2.95247500 | -0.68568300 | 3.57507100  |
| C | 3.84935900  | 4.63503200  | -0.96525200 | C  | -2.73270400 | -2.11910500 | 1.64916400  |
| C | 4.30709700  | 2.73685900  | 0.45521500  | C  | -1.82834500 | -1.28058000 | 4.15047200  |
| C | 5.05696000  | 4.42712300  | -1.62965600 | H  | -3.48156800 | 0.09989000  | 4.10773900  |
| H | 3.19080800  | 5.43746600  | -1.28447600 | C  | -1.60158400 | -2.70739000 | 2.21554700  |
| C | 5.51305800  | 2.52951200  | -0.20864600 | H  | -3.08097000 | -2.46958600 | 0.68340000  |
| H | 4.02938400  | 2.08293800  | 1.27589500  | C  | -1.13913600 | -2.28153400 | 3.46256400  |
| C | 5.89069000  | 3.37112600  | -1.25646500 | H  | -1.49559900 | -0.96672600 | 5.13578400  |
| H | 5.34257200  | 5.08541800  | -2.44495100 | H  | -1.07829900 | -3.49050000 | 1.68001200  |
| H | 6.15300500  | 1.70636100  | 0.09009700  | H  | -0.25970000 | -2.74344700 | 3.90184300  |
| H | 6.82977400  | 3.20739000  | -1.77672900 | C  | -4.37201600 | 2.54483100  | -1.11133800 |
| C | 0.84049500  | -4.61652400 | -0.33407100 | C  | -3.38150800 | 3.51753200  | -0.91822200 |
| C | 2.01259900  | -4.15713300 | -0.95358500 | C  | -4.75991700 | 2.23195200  | -2.41986600 |
| C | 0.95682200  | -5.36591200 | 0.84710500  | C  | -2.77497200 | 4.14465000  | -2.00602300 |
| C | 3.26400200  | -4.42581600 | -0.40583700 | H  | -3.08536000 | 3.79401200  | 0.08842800  |
| H | 1.94125500  | -3.59835300 | -1.88078300 | C  | -4.16046600 | 2.86263900  | -3.51140400 |
| C | 2.20878600  | -5.63056500 | 1.40035400  | H  | -5.53996500 | 1.49270200  | -2.58152500 |
| H | 0.06051500  | -5.72120800 | 1.34827800  | C  | -3.15873100 | 3.81331700  | -3.30758900 |
| C | 3.36578600  | -5.15879100 | 0.77771800  | H  | -2.01094600 | 4.89747900  | -1.83521300 |
| H | 4.15730900  | -4.05631500 | -0.89965000 | H  | -4.48151200 | 2.61778700  | -4.51972000 |
| H | 2.28013200  | -6.20208400 | 2.32110800  | H  | -2.69250500 | 4.30541100  | -4.15574000 |
| H | 4.34017200  | -5.36504500 | 1.21042500  | Cu | -0.62257800 | 0.33009400  | -0.46049100 |

|                |             |             |             |   |             |             |             |
|----------------|-------------|-------------|-------------|---|-------------|-------------|-------------|
| C              | 3.56252900  | -0.88355200 | -0.06968000 | H | -3.23264600 | -3.51301300 | 3.13826100  |
| C              | 3.34142400  | -0.36622500 | -1.35518800 | C | -1.52239500 | -3.84150900 | -0.69659200 |
| C              | 4.46956200  | -0.25061200 | -2.18918300 | C | -0.41689400 | -3.12973700 | -1.43084800 |
| C              | 5.74195500  | -0.64024500 | -1.79339000 | C | 1.13290700  | -3.02151700 | -3.09080100 |
| C              | 5.93185300  | -1.16303800 | -0.51500900 | C | 1.24530600  | -1.79877400 | -2.14263600 |
| C              | 4.84287300  | -1.27659100 | 0.34324900  | H | 0.73934000  | -2.79878700 | -4.08348500 |
| C              | 1.99722700  | 0.09144500  | -1.96536400 | H | 1.17603700  | -0.83120600 | -2.62962900 |
| H              | 4.33942800  | 0.16240400  | -3.18379100 | C | -2.67541100 | -4.13649100 | -1.71871900 |
| H              | 6.57729500  | -0.53380100 | -2.47830600 | H | -2.27187900 | -4.80751700 | -2.48068100 |
| H              | 6.91581300  | -1.47883600 | -0.18184700 | H | -3.45985200 | -4.67372500 | -1.18001700 |
| H              | 4.98277700  | -1.68143100 | 1.33875400  | C | -0.93360200 | -5.17704400 | -0.10148800 |
| O              | 0.96284800  | -0.22741000 | -1.08520000 | H | -1.77499000 | -5.75968100 | 0.28038500  |
| I              | 2.07356800  | -1.19289600 | 1.47356500  | H | -0.48439300 | -5.73280600 | -0.92783300 |
| C              | 2.00688700  | 1.59474200  | -2.27732400 | O | -3.06212900 | -3.72662100 | 1.10506900  |
| H              | 2.10802700  | 2.17158300  | -1.35985600 | O | 0.11523300  | -3.84967400 | -2.42852600 |
| H              | 2.83098800  | 1.87507200  | -2.93841500 | N | -1.77551900 | -1.90592300 | 0.91954000  |
| H              | 1.06273100  | 1.86697300  | -2.76450200 | N | 0.08549300  | -1.96610500 | -1.23365400 |
| C              | 1.70938200  | -0.71463400 | -3.25779400 | H | -2.01155100 | -1.38262200 | 2.94043900  |
| H              | 1.73302600  | -1.78744500 | -3.05763400 | C | -4.97268600 | -2.56297100 | 2.14725000  |
| H              | 0.71574400  | -0.44365000 | -3.62994000 | H | -5.48249200 | -3.22914800 | 1.44305600  |
| H              | 2.44028800  | -0.48653700 | -4.03728900 | C | -4.97050200 | -1.10927400 | 1.72941700  |
|                |             |             |             | C | -3.68506200 | -0.56274300 | 1.78924000  |
| <b>FavInt4</b> |             |             |             | C | -3.46321900 | 0.78085400  | 1.52637000  |
| C              | -2.65048300 | -1.62020400 | 2.09161400  | C | -4.52886300 | 1.60203300  | 1.12815400  |
| C              | -3.48046400 | -2.92632200 | 2.25343700  | C | -5.81535400 | 1.03974000  | 1.04116200  |
| C              | -2.09073400 | -3.06137700 | 0.46090600  | C | -6.04439000 | -0.30235400 | 1.35412300  |

|   |             |             |             |   |             |             |             |
|---|-------------|-------------|-------------|---|-------------|-------------|-------------|
| H | -2.46017300 | 1.17806900  | 1.58585100  | C | -4.88813700 | 3.60442200  | -0.34239100 |
| H | -6.65130300 | 1.67130700  | 0.75613900  | C | -3.02107100 | 5.07806500  | 1.11349400  |
| H | -7.05238400 | -0.70494700 | 1.30853000  | H | -2.86066400 | 3.33899900  | 2.36848500  |
| H | -5.46436600 | -2.69449600 | 3.11879400  | C | -4.58328500 | 4.91234100  | -0.71938700 |
| C | 3.11627600  | -1.19804600 | -0.44071800 | H | -5.59487400 | 3.02463000  | -0.92892600 |
| C | 4.39749000  | -1.49654000 | 0.04985100  | C | -3.64833300 | 5.65369400  | 0.00641800  |
| C | 5.07016900  | -2.62449000 | -0.46114900 | H | -2.29959400 | 5.65014600  | 1.68962900  |
| C | 4.51149200  | -3.42018400 | -1.46081000 | H | -5.07334900 | 5.35129200  | -1.58344100 |
| C | 3.25535400  | -3.08887500 | -1.96646800 | H | -3.41576600 | 6.67376100  | -0.28435800 |
| C | 2.56838700  | -1.99088200 | -1.44206700 | C | 2.49121200  | -3.73791600 | -3.09982400 |
| H | 2.58485400  | -0.32111900 | -0.09127200 | H | 2.99240800  | -3.57770200 | -4.06228800 |
| H | 6.04550500  | -2.88190400 | -0.06062100 | H | 2.36094700  | -4.81977100 | -2.98712800 |
| H | 5.05686500  | -4.27935100 | -1.84115200 | C | -3.20921400 | -2.86793100 | -2.34488200 |
| C | 5.05112100  | -0.61980600 | 1.04832500  | C | -4.13534600 | -2.06895600 | -1.66092100 |
| C | 4.31562200  | -0.00156900 | 2.07205200  | C | -2.73620800 | -2.43156800 | -3.58862400 |
| C | 6.43136900  | -0.37213200 | 0.97251400  | C | -4.56682800 | -0.85572300 | -2.19506900 |
| C | 4.94769600  | 0.82937900  | 2.99540800  | H | -4.52989000 | -2.39834500 | -0.70630500 |
| H | 3.24949900  | -0.19336000 | 2.15415100  | C | -3.17644500 | -1.22425600 | -4.13405000 |
| C | 7.06108500  | 0.46225700  | 1.89331800  | H | -2.02931800 | -3.04868400 | -4.13721400 |
| H | 7.00922100  | -0.81407600 | 0.16662300  | C | -4.08720900 | -0.43032700 | -3.43524600 |
| C | 6.32078800  | 1.06510700  | 2.91034400  | H | -5.27489500 | -0.24966900 | -1.63827900 |
| H | 4.37344200  | 1.28643200  | 3.79315600  | H | -2.80887900 | -0.90522700 | -5.10478200 |
| H | 8.12791000  | 0.64754100  | 1.81053500  | H | -4.42515400 | 0.51100600  | -3.85813100 |
| H | 6.80836600  | 1.71423600  | 3.63140700  | C | 0.07309100  | -4.89168700 | 0.99031800  |
| C | -4.26388100 | 3.01416300  | 0.76714100  | C | 1.39802600  | -4.57572100 | 0.66825400  |
| C | -3.32870200 | 3.77268200  | 1.48995800  | C | -0.32426400 | -4.83180400 | 2.33286000  |

|    |             |             |             |   |             |             |             |
|----|-------------|-------------|-------------|---|-------------|-------------|-------------|
| C  | 2.29707400  | -4.16677400 | 1.65273000  | C | -0.40233800 | 1.00020900  | -3.20896800 |
| H  | 1.73383100  | -4.64466300 | -0.36014300 | H | -1.01907100 | 1.60927900  | -3.87808600 |
| C  | 0.57272600  | -4.42945900 | 3.32308000  | H | 0.61121000  | 0.97853900  | -3.61460000 |
| H  | -1.33936000 | -5.11040100 | 2.60179500  | H | -0.81647900 | -0.01274500 | -3.20320900 |
| C  | 1.88228100  | -4.08185700 | 2.98298600  | C | 0.31516700  | 1.27017900  | 2.36015700  |
| H  | 3.31540000  | -3.91630000 | 1.37533500  | O | -0.36736300 | 0.30181100  | 1.91139400  |
| H  | 0.25292900  | -4.39876300 | 4.36092500  | N | 1.02170300  | 1.99939000  | 1.48363000  |
| H  | 2.58119700  | -3.76739000 | 3.75245700  | H | 0.89121100  | 1.68355900  | 0.49096900  |
| Cu | -0.45367400 | -0.58237600 | 0.10397600  | C | 0.26620700  | 1.52146400  | 3.87607000  |
| C  | 1.44898300  | 3.38022400  | -2.05008800 | C | 1.64724100  | 1.22112900  | 4.49661000  |
| C  | 0.09977200  | 3.03854200  | -1.84237500 | C | -0.14963000 | 2.97468300  | 4.18626500  |
| C  | -0.80561200 | 4.11250400  | -1.75109300 | C | -0.76931700 | 0.57014100  | 4.50264900  |
| C  | -0.40936800 | 5.44194900  | -1.87555200 | H | 1.97933500  | 0.20574300  | 4.25469900  |
| C  | 0.93168200  | 5.74683200  | -2.09027000 | H | 2.39942900  | 1.93117400  | 4.15236700  |
| C  | 1.86040300  | 4.71102500  | -2.17080000 | H | 1.57413800  | 1.30079100  | 5.58631500  |
| C  | -0.43147800 | 1.58879100  | -1.78298500 | H | -1.06650800 | 3.25018700  | 3.65440000  |
| H  | -1.85434500 | 3.91460400  | -1.57575300 | H | -0.34625800 | 3.06622500  | 5.25916100  |
| H  | -1.15283800 | 6.22889200  | -1.79657900 | H | 0.63492100  | 3.68550900  | 3.92802400  |
| H  | 1.26208900  | 6.77619400  | -2.19155000 | H | -0.80515200 | 0.74896500  | 5.58167800  |
| H  | 2.90852200  | 4.93600700  | -2.33068400 | H | -1.77120100 | 0.73690800  | 4.09585000  |
| O  | 0.38205400  | 0.83807200  | -0.88449400 | H | -0.49746700 | -0.47621200 | 4.33898800  |
| I  | 3.05504400  | 1.95659800  | -2.21980400 | S | 2.18321200  | 3.24943700  | 1.75293200  |
| C  | -1.88503000 | 1.54486200  | -1.29275300 | C | 1.17561800  | 4.72112600  | 1.37777200  |
| H  | -1.98582200 | 2.04586400  | -0.33093600 | H | 1.88286100  | 5.55188100  | 1.29585500  |
| H  | -2.58570000 | 2.00615000  | -1.99338200 | H | 0.66618800  | 4.59556000  | 0.42399300  |
| H  | -2.20712900 | 0.50181100  | -1.19225900 | H | 0.45505200  | 4.93087800  | 2.17167300  |

**Disflnt4**

|   |             |             |             |   |             |             |             |
|---|-------------|-------------|-------------|---|-------------|-------------|-------------|
| C | 2.23950800  | -0.80862800 | -2.58652100 | C | 3.05887500  | 0.43468700  | -2.33941400 |
| C | 3.28692100  | -1.88340100 | -2.99808100 | C | 2.61020600  | 1.66243100  | -1.86909600 |
| C | 2.32096400  | -2.40530000 | -1.01024900 | C | 3.54082400  | 2.66179000  | -1.54280100 |
| H | 3.00249100  | -2.48435100 | -3.86128200 | C | 4.91015300  | 2.39661700  | -1.72407400 |
| C | 2.08838600  | -3.36722500 | 0.12467200  | C | 5.35415400  | 1.17547600  | -2.23411200 |
| C | 1.06246400  | -2.89574400 | 1.12356200  | H | 1.55421800  | 1.84271200  | -1.70136700 |
| C | -0.21968100 | -3.21868500 | 2.97784900  | H | 5.63124100  | 3.17322800  | -1.48848900 |
| C | -0.61245500 | -1.91108700 | 2.24657800  | H | 6.41573500  | 1.00529200  | -2.39055600 |
| H | 0.27923900  | -3.07359100 | 3.93643400  | H | 4.94005700  | -1.12353200 | -4.18644700 |
| H | -0.60056700 | -1.02690500 | 2.87359600  | C | -2.65468800 | -1.45283900 | 0.70647000  |
| C | 3.43002700  | -3.62528500 | 0.88655600  | C | -3.81419700 | -1.97808400 | 0.11461000  |
| H | 3.24963400  | -4.43470400 | 1.59831800  | C | -4.24802900 | -3.26218600 | 0.49573300  |
| H | 4.15536000  | -3.98381100 | 0.15196600  | C | -3.55484000 | -4.01816200 | 1.44150000  |
| C | 1.56294200  | -4.70221100 | -0.54465300 | C | -2.39421400 | -3.49429100 | 2.00830700  |
| H | 2.43369000  | -5.21177300 | -0.96422200 | C | -1.95572200 | -2.22162300 | 1.62937000  |
| H | 1.15806200  | -5.33117400 | 0.25152700  | H | -2.29427500 | -0.46845400 | 0.42941100  |
| O | 3.28728100  | -2.79646400 | -1.85326900 | H | -5.15674200 | -3.66262800 | 0.05744800  |
| O | 0.78250100  | -3.80045600 | 2.07244200  | H | -3.91836700 | -5.00221400 | 1.72336600  |
| N | 1.67728900  | -1.34217100 | -1.32073100 | C | -4.55756400 | -1.20211100 | -0.90571500 |
| N | 0.41824800  | -1.78688000 | 1.18433100  | C | -5.10261000 | -1.83405100 | -2.03552200 |
| H | 1.41983300  | -0.67938700 | -3.29408900 | C | -4.74432000 | 0.18107900  | -0.75601900 |
| C | 4.65104300  | -1.18735800 | -3.13005700 | C | -5.81670100 | -1.10650500 | -2.98682400 |
| H | 5.43179800  | -1.76385900 | -2.62301000 | H | -4.95998500 | -2.90210200 | -2.17351100 |
| C | 4.42017800  | 0.18802500  | -2.54400000 | C | -5.47959600 | 0.90259000  | -1.69468900 |
|   |             |             |             | H | -4.34346600 | 0.67840000  | 0.12088800  |
|   |             |             |             | C | -6.01544400 | 0.26437900  | -2.81581900 |

|   |             |             |             |    |             |             |             |
|---|-------------|-------------|-------------|----|-------------|-------------|-------------|
| H | -6.22539700 | -1.61243100 | -3.85652500 | H  | 4.02545800  | -0.96555900 | 4.69353200  |
| H | -5.65156800 | 1.96388900  | -1.54156600 | H  | 5.23869600  | 0.79528200  | 3.42563700  |
| H | -6.58697500 | 0.82943500  | -3.54596700 | C  | 0.54698900  | -4.42325500 | -1.62946600 |
| C | 3.07540300  | 3.94664400  | -0.97482200 | C  | -0.74493600 | -3.98234400 | -1.31573900 |
| C | 1.95333500  | 4.60046300  | -1.50630300 | C  | 0.92949900  | -4.48359200 | -2.97591000 |
| C | 3.72642700  | 4.51464700  | 0.13115300  | C  | -1.61738100 | -3.57016100 | -2.32236800 |
| C | 1.49429500  | 5.79118600  | -0.94616100 | H  | -1.07772100 | -3.95145300 | -0.28413700 |
| H | 1.45487500  | 4.18333800  | -2.37655000 | C  | 0.05370200  | -4.08360100 | -3.98630100 |
| C | 3.26307800  | 5.70199000  | 0.69470400  | H  | 1.92311600  | -4.84231700 | -3.23078200 |
| H | 4.58162900  | 4.00509100  | 0.56573400  | C  | -1.21829000 | -3.61120300 | -3.65909300 |
| C | 2.14511700  | 6.34370700  | 0.15806800  | H  | -2.60409000 | -3.20969300 | -2.05799600 |
| H | 0.62798600  | 6.28610900  | -1.37297800 | H  | 0.36280700  | -4.14631100 | -5.02589200 |
| H | 3.77101500  | 6.12350000  | 1.55711900  | H  | -1.89939600 | -3.28822900 | -4.44059200 |
| H | 1.78434100  | 7.26880200  | 0.59709700  | Cu | 0.36329900  | -0.32388900 | -0.18521200 |
| C | -1.46506200 | -4.11460900 | 3.02950900  | C  | -1.33806600 | 1.22345200  | 3.64912900  |
| H | -1.89993600 | -4.08447900 | 4.03660900  | C  | 0.01012300  | 1.20943600  | 3.24995500  |
| H | -1.20820000 | -5.15839700 | 2.82228500  | C  | 0.91418800  | 0.63980300  | 4.16573300  |
| C | 3.94548800  | -2.39420400 | 1.59802700  | C  | 0.51259000  | 0.08692900  | 5.37988200  |
| C | 4.63318700  | -1.39500100 | 0.89446700  | C  | -0.83463600 | 0.09396300  | 5.73044300  |
| C | 3.71936600  | -2.21651100 | 2.96827500  | C  | -1.75920200 | 0.67413100  | 4.86309900  |
| C | 5.08825600  | -0.24882900 | 1.54366200  | C  | 0.51756500  | 1.69700300  | 1.87601500  |
| H | 4.82669100  | -1.51856400 | -0.16562300 | H  | 1.96421600  | 0.59855400  | 3.91009900  |
| C | 4.18686500  | -1.07632700 | 3.62497400  | H  | 1.25408100  | -0.34608300 | 6.04523600  |
| H | 3.19438600  | -2.98724600 | 3.52681300  | H  | -1.17146400 | -0.33233400 | 6.67054800  |
| C | 4.87237900  | -0.08985200 | 2.91422600  | H  | -2.80936600 | 0.69787000  | 5.13042100  |
| H | 5.61135000  | 0.51491000  | 0.97610100  | O  | -0.28519600 | 1.11920500  | 0.85395600  |

|   |             |             |             |               |             |             |             |
|---|-------------|-------------|-------------|---------------|-------------|-------------|-------------|
| I | -2.95525300 | 2.04212900  | 2.48039500  | S             | -1.60833700 | 3.99442800  | -1.55524800 |
| C | 0.41745000  | 3.23338700  | 1.77092800  | C             | -3.36531800 | 4.06333400  | -1.08506400 |
| H | -0.60904900 | 3.58372900  | 1.87780900  | H             | -3.98792700 | 3.52660700  | -1.80232400 |
| H | 1.02743200  | 3.70454900  | 2.54842700  | H             | -3.50267700 | 3.66447200  | -0.07857500 |
| H | 0.79295900  | 3.55855600  | 0.79753000  | H             | -3.63167500 | 5.12511200  | -1.08960000 |
| C | 1.99011600  | 1.32195700  | 1.64537700  |               |             |             |             |
| H | 2.66309400  | 1.83780000  | 2.33537300  | <b>IntO_S</b> |             |             |             |
| H | 2.16435700  | 0.24748600  | 1.74501500  | C             | -1.84503100 | -1.00147100 | 2.28316700  |
| H | 2.27250500  | 1.62972500  | 0.63800000  | C             | -2.45194100 | -2.39053700 | 2.63782100  |
| C | -1.10913500 | 1.34477500  | -2.26785600 | C             | -1.04760800 | -2.54902000 | 0.85705200  |
| O | -0.57649300 | 0.26576900  | -1.88787100 | H             | -2.14861600 | -2.78888700 | 3.60583900  |
| N | -1.26524000 | 2.31879000  | -1.34952600 | C             | -0.41900800 | -3.33227700 | -0.26678700 |
| H | -0.92891100 | 2.03258000  | -0.40107500 | C             | 0.29796500  | -2.48148800 | -1.28878000 |
| C | -1.46879000 | 1.46336300  | -3.75427200 | C             | 1.36402100  | -2.21254400 | -3.28103700 |
| C | -2.81889300 | 2.15755900  | -4.01404400 | C             | 1.33569400  | -0.87791400 | -2.47992400 |
| C | -0.32000500 | 2.24656200  | -4.43366000 | H             | 0.73025900  | -2.23236100 | -4.16818300 |
| C | -1.54830700 | 0.04101700  | -4.34370400 | H             | 0.86279200  | -0.03968900 | -2.99512400 |
| H | -3.61992300 | 1.68413100  | -3.43999100 | C             | -1.54735800 | -4.15563000 | -0.97747200 |
| H | -2.78973500 | 3.22247400  | -3.78465000 | H             | -1.12942800 | -4.53912800 | -1.91299900 |
| H | -3.06476600 | 2.05271200  | -5.07597800 | H             | -1.76255000 | -5.02089700 | -0.34646400 |
| H | 0.64981100  | 1.77015300  | -4.25140200 | C             | 0.64348200  | -4.30606900 | 0.37511000  |
| H | -0.48909100 | 2.26999100  | -5.51530200 | H             | 0.09187200  | -4.98787500 | 1.02772500  |
| H | -0.27358200 | 3.27915500  | -4.07572700 | H             | 1.07690800  | -4.89562400 | -0.43703100 |
| H | -1.77032300 | 0.11361000  | -5.41320800 | O             | -1.85430200 | -3.27629600 | 1.63167300  |
| H | -0.61681500 | -0.51361100 | -4.21823600 | O             | 0.76600700  | -3.16871100 | -2.33789200 |
| H | -2.34476100 | -0.53626300 | -3.86364800 | N             | -0.90302900 | -1.31307800 | 1.17887000  |

|   |             |             |             |   |             |             |             |
|---|-------------|-------------|-------------|---|-------------|-------------|-------------|
| N | 0.52283400  | -1.21772800 | -1.28454300 | C | 6.44815800  | 1.85198700  | 2.02038000  |
| H | -1.29536000 | -0.52897200 | 3.10043100  | H | 6.38661200  | -0.08490700 | 1.08638400  |
| C | -3.97650100 | -2.30215600 | 2.44528000  | C | 5.12283900  | 3.57695200  | 0.97151100  |
| H | -4.32759100 | -3.12007500 | 1.80876000  | H | 4.05713600  | 2.99197200  | -0.80322100 |
| C | -4.19492800 | -0.94243900 | 1.82283000  | C | 5.98720600  | 3.16999400  | 1.99043800  |
| C | -3.01738300 | -0.19306400 | 1.77753800  | H | 7.12294300  | 1.52923000  | 2.80780100  |
| C | -2.99834900 | 1.09286900  | 1.24750600  | H | 4.77192000  | 4.60396700  | 0.93104700  |
| C | -4.18069500 | 1.65240000  | 0.74067400  | H | 6.30563100  | 3.87646100  | 2.75096900  |
| C | -5.36223600 | 0.88986700  | 0.78893600  | C | -4.17555500 | 3.02420400  | 0.18208200  |
| C | -5.37758500 | -0.39544000 | 1.32867300  | C | -3.47015400 | 4.05325400  | 0.82668100  |
| H | -2.08428700 | 1.67405900  | 1.19839700  | C | -4.87495800 | 3.32295500  | -0.99748600 |
| H | -6.28486000 | 1.32720400  | 0.42005800  | C | -3.47607200 | 5.34824100  | 0.31069400  |
| H | -6.30380800 | -0.96121300 | 1.36036700  | H | -2.93673700 | 3.84252600  | 1.74865900  |
| H | -4.48740400 | -2.39539600 | 3.41105400  | C | -4.86887200 | 4.61547300  | -1.51988800 |
| C | 3.29044300  | 0.35714700  | -1.29469000 | H | -5.40913600 | 2.53191500  | -1.51646300 |
| C | 4.65244600  | 0.35276900  | -0.95852500 | C | -4.17208600 | 5.63305800  | -0.86559400 |
| C | 5.48241800  | -0.63910800 | -1.51320800 | H | -2.94245400 | 6.13694300  | 0.83238300  |
| C | 4.97394900  | -1.61736500 | -2.36967900 | H | -5.40721800 | 4.82757100  | -2.43887800 |
| C | 3.61085800  | -1.62190500 | -2.66671200 | H | -4.17337100 | 6.64138500  | -1.26820400 |
| C | 2.78391000  | -0.63622100 | -2.12169400 | C | 2.83341000  | -2.57036600 | -3.55230700 |
| H | 2.62419300  | 1.10803500  | -0.89005700 | H | 3.06655500  | -2.41138300 | -4.61231400 |
| H | 6.54272000  | -0.63219600 | -1.27945000 | H | 3.01967700  | -3.62888500 | -3.34216700 |
| H | 5.63774400  | -2.36522300 | -2.79418700 | C | -2.83611100 | -3.39109400 | -1.21710200 |
| C | 5.16198800  | 1.33843600  | 0.02225000  | C | -4.05554100 | -3.99931800 | -0.89442200 |
| C | 6.04040200  | 0.94399700  | 1.04395200  | C | -2.85892100 | -2.08934900 | -1.73843800 |
| C | 4.71473100  | 2.66873200  | -0.00303300 | C | -5.26506700 | -3.33188100 | -1.08973000 |

|    |             |             |             |                         |             |             |             |
|----|-------------|-------------|-------------|-------------------------|-------------|-------------|-------------|
| H  | -4.05635500 | -5.00674200 | -0.48598200 | H                       | -0.65975600 | 5.36312400  | 0.14465300  |
| C  | -4.06516500 | -1.41270900 | -1.91902500 | H                       | 1.10458300  | 5.47872300  | 0.11605600  |
| H  | -1.93719700 | -1.58219500 | -1.99983100 | C                       | -0.98662500 | 3.78826400  | -2.10586500 |
| C  | -5.27231800 | -2.03202600 | -1.59734600 | H                       | -1.87980400 | 3.74814200  | -1.47685400 |
| H  | -6.19929200 | -3.82618600 | -0.83973000 | H                       | -1.09892300 | 4.62943500  | -2.79795000 |
| H  | -4.05778400 | -0.39798100 | -2.30538800 | H                       | -0.92684800 | 2.86365600  | -2.68677800 |
| H  | -6.21064200 | -1.50485700 | -1.73797200 | C                       | 1.52920300  | 3.96677100  | -2.16991700 |
| C  | 1.70504900  | -3.56161900 | 1.14845700  | H                       | 1.63824900  | 3.00204600  | -2.67372400 |
| C  | 2.85950100  | -3.09397700 | 0.51091900  | H                       | 1.43799400  | 4.74764800  | -2.93211600 |
| C  | 1.51468900  | -3.26023700 | 2.50394600  | H                       | 2.44054400  | 4.16739200  | -1.59604900 |
| C  | 3.79479900  | -2.32597200 | 1.20381700  | C                       | 2.24596300  | 1.37344000  | 2.27662300  |
| H  | 3.03395100  | -3.33140300 | -0.53348800 | H                       | 2.63990100  | 2.28494600  | 2.73123800  |
| C  | 2.44907900  | -2.49436200 | 3.20180400  | H                       | 2.33867400  | 0.53037400  | 2.96467200  |
| H  | 0.63486200  | -3.64023300 | 3.01762300  | H                       | 2.78428500  | 1.15943500  | 1.35524000  |
| C  | 3.58934900  | -2.01852800 | 2.54925600  |                         |             |             |             |
| H  | 4.68035800  | -1.97431700 | 0.68844400  |                         |             |             |             |
| H  | 2.29544700  | -2.28400300 | 4.25654600  | <b>OSSFavTSHAT_RC-1</b> |             |             |             |
| H  | 4.32124400  | -1.42340000 | 3.08761400  | C                       | -3.50787300 | 0.47257800  | 2.60327400  |
| Cu | 0.08777800  | 0.07117900  | 0.19478000  | C                       | -4.99550600 | 0.23782300  | 3.00215900  |
| N  | 0.42210100  | 3.03780700  | 0.99605800  | C                       | -4.55500300 | -0.63688700 | 0.95337900  |
| S  | 0.46235100  | 1.62119000  | 1.97186500  | H                       | -5.13456400 | -0.43952600 | 3.84442200  |
| C  | 0.38339200  | 2.80134300  | -0.29182200 | C                       | -4.97207900 | -1.44611800 | -0.24923700 |
| O  | 0.40604500  | 1.62738900  | -0.86231200 | C                       | -3.87446600 | -1.66195200 | -1.26337200 |
| C  | 0.28755500  | 3.98771400  | -1.25534900 | C                       | -3.10408200 | -2.53859800 | -3.21738500 |
| C  | 0.21739300  | 5.32345900  | -0.50422600 | C                       | -1.96106100 | -1.83952900 | -2.43108300 |
| H  | 0.15091600  | 6.14308700  | -1.22829000 | H                       | -3.40936400 | -2.03006900 | -4.13262300 |
|    |             |             |             | H                       | -1.43792000 | -1.06140700 | -2.98220300 |

|   |             |             |             |   |             |             |             |
|---|-------------|-------------|-------------|---|-------------|-------------|-------------|
| C | -6.15499400 | -0.71310000 | -0.96960400 | C | -0.86289600 | -5.37251100 | -2.14916400 |
| H | -6.53147200 | -1.37869200 | -1.75007300 | C | -1.51512900 | -4.19180100 | -2.50003100 |
| H | -6.95055400 | -0.57554800 | -0.23309700 | C | -1.05715500 | -2.97054700 | -1.99573900 |
| C | -5.41559900 | -2.85592500 | 0.30472200  | H | 0.40746100  | -1.94466800 | -0.78470000 |
| H | -6.35232100 | -2.70966600 | 0.84749900  | H | 0.77453700  | -6.22031100 | -1.04668500 |
| H | -5.61909100 | -3.49955900 | -0.55432400 | H | -1.20213900 | -6.33119800 | -2.53121300 |
| O | -5.55182100 | -0.44821200 | 1.83562100  | C | 1.92627800  | -4.05297500 | 0.05859400  |
| O | -4.24245600 | -2.43630600 | -2.29599400 | C | 2.95817900  | -3.12843200 | -0.16946900 |
| N | -3.40739000 | -0.16961100 | 1.26919000  | C | 2.07013300  | -4.98038200 | 1.10256800  |
| N | -2.66690400 | -1.23028300 | -1.27717200 | C | 4.11180700  | -3.15438300 | 0.61206100  |
| H | -2.77679100 | -0.00255000 | 3.25867700  | H | 2.86452900  | -2.41040500 | -0.97871400 |
| C | -5.65871300 | 1.61440000  | 3.19659400  | C | 3.21412000  | -4.98510700 | 1.90006700  |
| H | -6.58852900 | 1.67873500  | 2.62109200  | H | 1.27346300  | -5.69343700 | 1.29684400  |
| C | -4.59899200 | 2.60364300  | 2.76396000  | C | 4.24304600  | -4.07546900 | 1.65273500  |
| C | -3.37509400 | 1.97319700  | 2.52130600  | H | 4.91606600  | -2.45488200 | 0.42033900  |
| C | -2.23859700 | 2.69973000  | 2.19312300  | H | 3.30287700  | -5.70256600 | 2.71067200  |
| C | -2.32261400 | 4.09410500  | 2.05265100  | H | 5.13930400  | -4.07339900 | 2.26365300  |
| C | -3.56409900 | 4.72006400  | 2.27117700  | C | -1.12957200 | 4.87458000  | 1.64786700  |
| C | -4.69592200 | 3.98866700  | 2.63577800  | C | 0.15158500  | 4.52176100  | 2.10322400  |
| H | -1.30700800 | 2.17881900  | 2.00947000  | C | -1.24774800 | 5.96115800  | 0.76577200  |
| H | -3.63321200 | 5.80044200  | 2.19020400  | C | 1.27548300  | 5.23952300  | 1.69859900  |
| H | -5.63415800 | 4.50132000  | 2.82884200  | H | 0.26245200  | 3.69565900  | 2.79952800  |
| H | -5.92963000 | 1.76063600  | 4.24920100  | C | -0.12310800 | 6.67756200  | 0.35801400  |
| C | 0.05737800  | -2.89821600 | -1.16522200 | H | -2.22614600 | 6.23071400  | 0.37930900  |
| C | 0.72657800  | -4.08064600 | -0.81128300 | C | 1.14345300  | 6.32107100  | 0.82589900  |
| C | 0.24642900  | -5.30812300 | -1.30646300 | H | 2.25504800  | 4.96198100  | 2.07548700  |

|   |             |             |             |    |             |             |             |
|---|-------------|-------------|-------------|----|-------------|-------------|-------------|
| H | -0.23656800 | 7.51421500  | -0.32523900 | H  | -1.40058900 | -4.52077400 | 3.51317300  |
| H | 2.01893400  | 6.88546700  | 0.51896300  | Cu | -1.71725700 | -0.20771700 | 0.13875200  |
| C | -2.70510600 | -4.00819400 | -3.41633300 | C  | 2.00043400  | 1.70120500  | -2.65701400 |
| H | -2.43267600 | -4.18350300 | -4.46450100 | C  | 0.89946300  | 2.41097600  | -2.14198500 |
| H | -3.54542300 | -4.67327300 | -3.19093600 | C  | 1.11728000  | 3.77001900  | -1.84728700 |
| C | -5.71299900 | 0.60989600  | -1.55469300 | C  | 2.34815700  | 4.39061400  | -2.04073600 |
| C | -5.57432400 | 1.74146000  | -0.73896600 | C  | 3.42417300  | 3.65422500  | -2.52716000 |
| C | -5.36065400 | 0.71026800  | -2.90617500 | C  | 3.24555000  | 2.30793700  | -2.83594700 |
| C | -5.08192400 | 2.93951400  | -1.25420200 | C  | -0.49535900 | 1.81185100  | -1.90123900 |
| H | -5.85838400 | 1.69029400  | 0.30614500  | H  | 0.31087700  | 4.36298700  | -1.43671700 |
| C | -4.88021500 | 1.91213200  | -3.42968000 | H  | 2.45944800  | 5.44016200  | -1.78886000 |
| H | -5.47596500 | -0.15561000 | -3.55318000 | H  | 4.40039400  | 4.10860400  | -2.66621100 |
| C | -4.73355400 | 3.02756900  | -2.60342700 | H  | 4.08039300  | 1.72795800  | -3.20639600 |
| H | -4.97226900 | 3.79791300  | -0.59796500 | O  | -0.33915100 | 0.55737200  | -1.17795200 |
| H | -4.62396800 | 1.97749500  | -4.48306900 | I  | 1.95962000  | -0.37317700 | -3.25099500 |
| H | -4.35663800 | 3.96102700  | -3.01064000 | C  | -1.38899300 | 2.71622700  | -1.05287300 |
| C | -4.35259600 | -3.43841900 | 1.20997300  | H  | -0.89651000 | 2.98409400  | -0.11977700 |
| C | -3.20845900 | -4.03874100 | 0.67151700  | H  | -1.66735000 | 3.63602300  | -1.57379500 |
| C | -4.43453000 | -3.27657100 | 2.59955700  | H  | -2.31900700 | 2.18712000  | -0.82626200 |
| C | -2.14938200 | -4.42433800 | 1.49302400  | C  | -1.20408200 | 1.52279000  | -3.22894200 |
| H | -3.13482700 | -4.20575700 | -0.39705000 | H  | -1.34233400 | 2.46038200  | -3.77584700 |
| C | -3.37888400 | -3.66354100 | 3.42598000  | H  | -0.62811200 | 0.84382600  | -3.85927900 |
| H | -5.33134500 | -2.84308900 | 3.03302500  | H  | -2.19374500 | 1.09754100  | -3.03787000 |
| C | -2.22554800 | -4.22388100 | 2.87229100  | C  | 0.64670100  | 0.02487400  | 1.85950600  |
| H | -1.27045800 | -4.87810300 | 1.04902700  | O  | -0.63881800 | -0.06920800 | 1.75657300  |
| H | -3.46016100 | -3.53560000 | 4.50167800  | N  | 1.30606100  | 0.42011500  | 0.79354200  |

|   |             |             |             |                         |             |             |             |
|---|-------------|-------------|-------------|-------------------------|-------------|-------------|-------------|
| H | 0.42963300  | 0.60980500  | -0.47511000 | H                       | 6.79444900  | 2.45638500  | 0.77788600  |
| C | 1.21853700  | -0.36246300 | 3.23643400  | H                       | 5.23643600  | -0.99469200 | -1.29330200 |
| C | 2.01607500  | -1.67305900 | 3.08570800  | H                       | 6.17831800  | -0.14590300 | -3.41407400 |
| C | 2.12003900  | 0.75420000  | 3.79789800  | H                       | 7.39880800  | 2.02229700  | -3.46104400 |
| C | 0.05966900  | -0.59946600 | 4.22341200  | C                       | 5.39381700  | 0.20009300  | 1.10641700  |
| H | 1.38931900  | -2.47712200 | 2.68742000  | C                       | 5.64532800  | -0.41943800 | 2.23655000  |
| H | 2.86663800  | -1.55799600 | 2.41382100  | H                       | 4.88158600  | -0.61016100 | 2.98542000  |
| H | 2.39111400  | -1.99007500 | 4.06554400  | C                       | 6.98870700  | -1.01802100 | 2.55846400  |
| H | 1.59555000  | 1.71685300  | 3.82036500  | F                       | 7.97543200  | -0.53538300 | 1.78665000  |
| H | 2.40656000  | 0.50776500  | 4.82604600  | F                       | 7.31392900  | -0.79695200 | 3.84757400  |
| H | 3.03446700  | 0.87291500  | 3.21475000  | F                       | 6.96125400  | -2.36617900 | 2.38224700  |
| H | 0.47243400  | -0.89298100 | 5.19462500  |                         |             |             |             |
| H | -0.53571900 | 0.30827500  | 4.36685100  |                         |             |             |             |
| H | -0.60559000 | -1.39367300 | 3.87459900  | <b>ossFavTSHAT_RC-2</b> |             |             |             |
| S | 3.02619000  | 0.53619300  | 0.56784300  | C                       | -3.20345700 | 0.89940900  | 2.69679500  |
| C | 3.18720600  | 2.33833800  | 0.78083400  | C                       | -4.63535700 | 0.75070900  | 3.29299100  |
| H | 4.10376700  | 2.65999700  | 0.28692600  | C                       | -4.41708000 | -0.46213700 | 1.38566900  |
| H | 2.33356700  | 2.80959300  | 0.29658000  | H                       | -4.67224900 | 0.23397800  | 4.25174500  |
| H | 3.21223700  | 2.60392100  | 1.84011200  | C                       | -4.95640500 | -1.46302200 | 0.39352600  |
| C | 7.16069100  | 2.37970600  | -1.34462600 | C                       | -3.98045000 | -1.85329600 | -0.69141200 |
| C | 6.65487300  | 1.90114600  | -0.14400300 | C                       | -3.42540900 | -3.06245500 | -2.53781600 |
| C | 5.96843000  | 0.65994500  | -0.10114500 | C                       | -2.21363200 | -2.23120300 | -2.03067900 |
| C | 5.78609000  | -0.06073200 | -1.30929900 | H                       | -3.84171800 | -2.73165000 | -3.48991500 |
| C | 6.30916600  | 0.42522300  | -2.49984000 | H                       | -1.78293700 | -1.55526400 | -2.76678400 |
| C | 6.99381200  | 1.64623700  | -2.52660300 | C                       | -6.22754400 | -0.86073200 | -0.29643100 |
| H | 7.70094900  | 3.32151700  | -1.36233500 | H                       | -6.68106900 | -1.64859800 | -0.90260400 |
|   |             |             |             | H                       | -6.93419600 | -0.59674500 | 0.49433400  |

|   |             |             |             |   |             |             |             |
|---|-------------|-------------|-------------|---|-------------|-------------|-------------|
| C | -5.30792000 | -2.75661800 | 1.22675700  | H | 0.36221900  | -2.03689700 | -0.73646700 |
| H | -6.17136600 | -2.51492600 | 1.85079900  | H | 0.79730200  | -6.29052100 | -0.28114100 |
| H | -5.60758500 | -3.53387200 | 0.51986400  | H | -1.36227900 | -6.66682000 | -1.42953300 |
| O | -5.30934700 | -0.12548100 | 2.33529200  | C | 2.05276300  | -3.97313200 | 0.21894700  |
| O | -4.45459600 | -2.79151500 | -1.52735600 | C | 3.03080900  | -3.14755200 | -0.35760700 |
| N | -3.24916500 | 0.04811800  | 1.48272000  | C | 2.37542300  | -4.69170700 | 1.38115500  |
| N | -2.78996400 | -1.43650700 | -0.91955000 | C | 4.31114300  | -3.07857600 | 0.19133100  |
| H | -2.40009700 | 0.52719600  | 3.33439500  | H | 2.79912400  | -2.59438400 | -1.26236400 |
| C | -5.28766400 | 2.14679300  | 3.31679300  | C | 3.64548200  | -4.59748800 | 1.94783900  |
| H | -6.26938200 | 2.12098100  | 2.83145400  | H | 1.62241400  | -5.32363600 | 1.84417300  |
| C | -4.28357900 | 3.04072500  | 2.62248700  | C | 4.62167200  | -3.80195700 | 1.34468500  |
| C | -3.08861500 | 2.36492200  | 2.35921000  | H | 5.07673500  | -2.48187800 | -0.29002800 |
| C | -1.99587400 | 3.01479600  | 1.80224400  | H | 3.87701400  | -5.15763500 | 2.84910600  |
| C | -2.09973800 | 4.36952900  | 1.44905400  | H | 5.62457000  | -3.75897600 | 1.76045100  |
| C | -3.31435300 | 5.03792600  | 1.69154800  | C | -0.95805400 | 5.05731500  | 0.80094200  |
| C | -4.39910500 | 4.38845300  | 2.28376700  | C | 0.36523400  | 4.75502000  | 1.16303200  |
| H | -1.08742600 | 2.45816100  | 1.60803600  | C | -1.17093300 | 5.99585200  | -0.22209300 |
| H | -3.39659900 | 6.09215300  | 1.44576500  | C | 1.43858500  | 5.37866400  | 0.52986200  |
| H | -5.31426700 | 4.93733200  | 2.48779500  | H | 0.55164600  | 4.04512500  | 1.96352700  |
| H | -5.45688000 | 2.47073100  | 4.35076700  | C | -0.09706100 | 6.61791900  | -0.85795700 |
| C | -0.01386800 | -3.04335200 | -0.88517100 | H | -2.18548400 | 6.22096600  | -0.53710700 |
| C | 0.72880500  | -4.14359700 | -0.42765400 | C | 1.21303000  | 6.31335800  | -0.48227300 |
| C | 0.21411500  | -5.43998900 | -0.62027300 | H | 2.45327700  | 5.14377600  | 0.83641500  |
| C | -0.99850600 | -5.65502800 | -1.27436800 | H | -0.28413600 | 7.34000500  | -1.64745600 |
| C | -1.72034900 | -4.55673800 | -1.73803200 | H | 2.05014700  | 6.80513500  | -0.96874200 |
| C | -1.23086500 | -3.26415100 | -1.52529800 | C | -3.02210100 | -4.54436700 | -2.50913200 |

|    |             |             |             |   |             |             |             |
|----|-------------|-------------|-------------|---|-------------|-------------|-------------|
| H  | -2.88206700 | -4.91562900 | -3.53187200 | C | 0.58530200  | 2.01884000  | -2.80213100 |
| H  | -3.81180700 | -5.15291100 | -2.05588600 | C | 0.83616700  | 3.40197600  | -2.73565800 |
| C  | -5.87991000 | 0.34126400  | -1.14640900 | C | 2.01957800  | 3.97147600  | -3.19632600 |
| C  | -5.65910900 | 1.59381900  | -0.55703200 | C | 3.01354300  | 3.15986700  | -3.73500100 |
| C  | -5.69799900 | 0.20922000  | -2.52848100 | C | 2.80324600  | 1.78479300  | -3.81332500 |
| C  | -5.25155200 | 2.68425700  | -1.32391100 | C | -0.75954400 | 1.48009400  | -2.28857800 |
| H  | -5.81220600 | 1.72206200  | 0.50859500  | H | 0.09471100  | 4.05854800  | -2.30029900 |
| C  | -5.30434700 | 1.30229600  | -3.30274800 | H | 2.15952300  | 5.04461300  | -3.11760700 |
| H  | -5.87805400 | -0.75323400 | -3.00061800 | H | 3.94570300  | 3.58300700  | -4.09712200 |
| C  | -5.07345100 | 2.54055400  | -2.70126600 | H | 3.56934200  | 1.14421600  | -4.23469700 |
| H  | -5.07505800 | 3.64083100  | -0.84077000 | O | -0.49648500 | 0.35140100  | -1.41017500 |
| H  | -5.18028600 | 1.18668400  | -4.37550700 | I | 1.49730600  | -0.91294100 | -3.62066000 |
| H  | -4.76329900 | 3.38915600  | -3.30368700 | C | -1.54035600 | 2.51485800  | -1.47839300 |
| C  | -4.13123000 | -3.18643100 | 2.07487100  | H | -0.93330600 | 2.90969600  | -0.66560600 |
| C  | -3.05932600 | -3.88243300 | 1.50421400  | H | -1.88652700 | 3.35148900  | -2.09105900 |
| C  | -4.03381600 | -2.78623900 | 3.41429200  | H | -2.43111200 | 2.03901600  | -1.05845300 |
| C  | -1.89723400 | -4.13088800 | 2.23402700  | C | -1.63918400 | 0.99670900  | -3.44683300 |
| H  | -3.12369000 | -4.23147000 | 0.48012400  | H | -1.87199000 | 1.84130800  | -4.10233300 |
| C  | -2.87460500 | -3.03505300 | 4.15005700  | H | -1.14552300 | 0.22899200  | -4.04402800 |
| H  | -4.87177000 | -2.27490900 | 3.87948500  | H | -2.58310000 | 0.60570800  | -3.05593800 |
| C  | -1.79593500 | -3.69403400 | 3.55590400  | C | 0.86253100  | 0.29095400  | 1.53025300  |
| H  | -1.07798000 | -4.66313000 | 1.76327000  | O | -0.42251200 | 0.21954300  | 1.59827100  |
| H  | -2.81642800 | -2.72162300 | 5.18856100  | N | 1.38919300  | 0.51466500  | 0.34129200  |
| H  | -0.89087000 | -3.88302200 | 4.12566600  | H | 0.34888000  | 0.51166600  | -0.82715500 |
| Cu | -1.70176100 | -0.18526700 | 0.17703900  | C | 1.59819100  | 0.08905600  | 2.86784200  |
| C  | 1.60502600  | 1.22571600  | -3.36064300 | C | 2.38751700  | -1.23354400 | 2.80071600  |



|   |             |             |             |   |             |             |             |
|---|-------------|-------------|-------------|---|-------------|-------------|-------------|
| O | 3.95568900  | 3.10226300  | -2.06816500 | C | 0.63327900  | -4.38319200 | -2.02582900 |
| O | 5.41630700  | -0.54265700 | 0.63284100  | C | 0.68175100  | -4.71352900 | -3.38999800 |
| N | 2.34208200  | 1.72032100  | -1.36885700 | C | -0.61841500 | -4.32954000 | -1.39271200 |
| N | 3.20071000  | -0.31920800 | 0.45262300  | C | -0.48624500 | -4.98335100 | -4.10186400 |
| H | 1.09584600  | 2.15903500  | -2.99211600 | H | 1.64066000  | -4.74700000 | -3.89934200 |
| C | 2.46989600  | 5.06406200  | -2.21518200 | C | -1.78311800 | -4.62197900 | -2.09977600 |
| H | 3.35581700  | 5.49463400  | -1.73664300 | H | -0.66925600 | -4.09158300 | -0.33503700 |
| C | 1.28673800  | 4.89419500  | -1.28827600 | C | -1.72368200 | -4.94521100 | -3.45735600 |
| C | 0.74290600  | 3.60850700  | -1.37805600 | H | -0.42876600 | -5.22918400 | -5.15809900 |
| C | -0.42505600 | 3.27013500  | -0.70326000 | H | -2.73981100 | -4.61383100 | -1.58621200 |
| C | -1.03816800 | 4.22003200  | 0.12865200  | H | -2.63319700 | -5.17002800 | -4.00628700 |
| C | -0.45095400 | 5.49039300  | 0.26317300  | C | -2.28845300 | 3.89433200  | 0.85576800  |
| C | 0.69591100  | 5.83938900  | -0.45158400 | C | -3.39908400 | 3.38600300  | 0.16596900  |
| H | -0.84448100 | 2.27286100  | -0.77687400 | C | -2.39709000 | 4.12713900  | 2.23523000  |
| H | -0.93051600 | 6.22409800  | 0.90398200  | C | -4.60038100 | 3.14599100  | 0.83177500  |
| H | 1.10668400  | 6.84173400  | -0.36695500 | H | -3.33166600 | 3.22857300  | -0.90594200 |
| H | 2.21571700  | 5.72094100  | -3.05608100 | C | -3.58896500 | 3.86040100  | 2.90764000  |
| C | 1.90765700  | -3.05247800 | -0.33229000 | H | -1.53751900 | 4.50888300  | 2.77908800  |
| C | 1.87498600  | -4.09517200 | -1.27114800 | C | -4.69645500 | 3.38003900  | 2.20540600  |
| C | 3.04901500  | -4.83812900 | -1.49846100 | H | -5.46401500 | 2.80682600  | 0.27087100  |
| C | 4.23490200  | -4.55854000 | -0.81820600 | H | -3.65768500 | 4.04091900  | 3.97644100  |
| C | 4.26117900  | -3.50536900 | 0.09502100  | H | -5.63484000 | 3.20238900  | 2.72294600  |
| C | 3.09868100  | -2.76305900 | 0.32256400  | C | 5.41526500  | -2.99151300 | 0.92948100  |
| H | 1.01799500  | -2.46047600 | -0.14699800 | H | 5.63427700  | -3.66509200 | 1.76761900  |
| H | 3.02336000  | -5.66014600 | -2.20692500 | H | 6.34674300  | -2.86661500 | 0.36789000  |
| H | 5.12342000  | -5.15380200 | -1.00858100 | C | 4.90730700  | 2.76834900  | 1.32027300  |

|    |            |             |             |   |             |             |             |
|----|------------|-------------|-------------|---|-------------|-------------|-------------|
| C  | 3.93523600 | 3.77469900  | 1.22480200  | C | 2.74723900  | -1.98297100 | 5.14611300  |
| C  | 5.17645100 | 2.21357400  | 2.57720800  | C | 1.70191400  | -2.62715800 | 4.48642500  |
| C  | 3.24807800 | 4.21522000  | 2.35427600  | C | 0.16798300  | 0.31292500  | 2.45086600  |
| H  | 3.72095300 | 4.22660600  | 0.26305100  | H | 2.24404200  | 1.14323900  | 3.98035900  |
| C  | 4.50253700 | 2.66470000  | 3.71376000  | H | 3.72681200  | -0.08755800 | 5.46940500  |
| H  | 5.93260000 | 1.43821000  | 2.66693500  | H | 3.40398600  | -2.55085700 | 5.79816800  |
| C  | 3.53430600 | 3.66438800  | 3.60551000  | H | 1.55091100  | -3.69140300 | 4.62520100  |
| H  | 2.49359900 | 4.98973400  | 2.25273200  | O | 0.21677700  | -0.36763800 | 1.16750600  |
| H  | 4.74246300 | 2.24216100  | 4.68539100  | I | -0.65243200 | -3.14122500 | 2.71078400  |
| H  | 3.01305800 | 4.01745600  | 4.49051900  | C | -1.28978000 | 0.44565500  | 2.91784400  |
| C  | 4.66383500 | 0.09374800  | -3.02022200 | H | -1.78443700 | -0.52054500 | 3.01622400  |
| C  | 4.03223400 | -1.13635000 | -2.79549800 | H | -1.31403900 | 0.94653900  | 3.89042400  |
| C  | 4.33557200 | 0.81806000  | -4.17351000 | H | -1.85712000 | 1.05411200  | 2.20757100  |
| C  | 3.06177800 | -1.60767600 | -3.67909300 | C | 0.73557300  | 1.72071600  | 2.24612800  |
| H  | 4.28753900 | -1.73117400 | -1.92536300 | H | 0.68196800  | 2.32172100  | 3.15810500  |
| C  | 3.37425800 | 0.34224500  | -5.06629900 | H | 1.77474900  | 1.69837100  | 1.90934700  |
| H  | 4.83384300 | 1.76422800  | -4.36671400 | H | 0.13891900  | 2.22584600  | 1.48750300  |
| C  | 2.72369700 | -0.86597900 | -4.81181400 | C | -1.20083400 | -0.19019200 | -1.71557800 |
| H  | 2.56536300 | -2.54869500 | -3.47481600 | O | 0.07516500  | -0.05067300 | -1.78237100 |
| H  | 3.13750000 | 0.91240900  | -5.96024700 | N | -1.73415400 | -0.31343700 | -0.51339200 |
| H  | 1.96519500 | -1.23334800 | -5.49610600 | H | -0.68100800 | -0.34533600 | 0.64547300  |
| Cu | 1.44535800 | 0.16666400  | -0.39512200 | C | -1.93284100 | -0.12054400 | -3.07287800 |
| C  | 0.84929900 | -1.90975600 | 3.64225900  | C | -3.01531200 | -1.20475300 | -3.22736800 |
| C  | 1.00979400 | -0.52844200 | 3.42385100  | C | -2.55808500 | 1.28591600  | -3.18879300 |
| C  | 2.06507700 | 0.08677100  | 4.12053400  | C | -0.90721800 | -0.31649600 | -4.20622000 |
| C  | 2.92368900 | -0.61466400 | 4.96316000  | H | -2.59760500 | -2.20035600 | -3.05194300 |

|   |             |             |             |
|---|-------------|-------------|-------------|
| H | -3.86021500 | -1.05261100 | -2.55484800 |
| H | -3.39877500 | -1.18130900 | -4.25350800 |
| H | -1.79174900 | 2.06694500  | -3.13395400 |
| H | -3.07591600 | 1.38640200  | -4.14930500 |
| H | -3.27918400 | 1.46711500  | -2.38677200 |
| H | -1.42071600 | -0.23832200 | -5.17085900 |
| H | -0.11078600 | 0.42907900  | -4.17224800 |
| H | -0.43923800 | -1.30363200 | -4.14220000 |
| S | -3.40190000 | -0.35363500 | -0.08141800 |
| C | -3.59605900 | -2.15489000 | 0.12255100  |
| H | -3.63947200 | -2.64653600 | -0.85055800 |
| H | -2.73414200 | -2.51458300 | 0.68530000  |
| H | -4.50989400 | -2.34405300 | 0.68603700  |
| C | -6.60462800 | -0.73318900 | 2.97173900  |
| C | -6.11229800 | -0.08595300 | 1.84741600  |
| C | -6.43651000 | -0.56930500 | 0.55103600  |
| C | -7.24560600 | -1.73195000 | 0.43163400  |
| C | -7.72948400 | -2.36227600 | 1.56761900  |
| C | -7.41119800 | -1.86989300 | 2.84081200  |
| H | -6.35924300 | -0.35364200 | 3.95900200  |
| H | -5.47486300 | 0.78482500  | 1.94241900  |
| H | -7.48687700 | -2.10401700 | -0.55844300 |
| H | -8.36094700 | -3.23981500 | 1.46789700  |
| H | -7.79074000 | -2.37130200 | 3.72559000  |
| C | -5.88658100 | 0.01826300  | -0.59992400 |
| C | -6.09710000 | 0.75127900  | -1.66571400 |

|   |             |            |             |
|---|-------------|------------|-------------|
| H | -5.33676100 | 0.93587500 | -2.41905800 |
| C | -7.39098100 | 1.48816200 | -1.89766400 |
| F | -8.39431000 | 1.03348900 | -1.13003500 |
| F | -7.23244200 | 2.80784500 | -1.62388400 |
| F | -7.76873000 | 1.39357700 | -3.18760200 |

<sup>OSS</sup>DisfTSHAT\_RC-2

|   |            |             |             |
|---|------------|-------------|-------------|
| C | 1.07991800 | 2.36142900  | -2.54454900 |
| C | 2.05135300 | 3.28329400  | -3.34035100 |
| C | 3.17407400 | 2.02474600  | -1.82011000 |
| H | 2.16115300 | 3.02212000  | -4.39261300 |
| C | 4.46899900 | 1.51774800  | -1.23480100 |
| C | 4.30319800 | 0.47012100  | -0.16002200 |
| C | 5.17890500 | -1.01527600 | 1.32930200  |
| C | 3.63627100 | -1.14782700 | 1.24165800  |
| H | 5.54833100 | -0.61473400 | 2.27376400  |
| H | 3.12243300 | -1.04872600 | 2.19306500  |
| C | 5.26965900 | 2.71394000  | -0.62233100 |
| H | 6.26059100 | 2.34266000  | -0.35024300 |
| H | 5.39707800 | 3.45816700  | -1.41222100 |
| C | 5.26010900 | 0.86723200  | -2.44135400 |
| H | 5.68330600 | 1.68681200  | -3.02721300 |
| H | 6.08880300 | 0.29255000  | -2.02076900 |
| O | 3.34731600 | 3.01416400  | -2.71782600 |
| O | 5.47259000 | -0.00413600 | 0.30706200  |
| N | 1.98210800 | 1.59534400  | -1.65567700 |

|   |             |             |             |   |             |             |             |
|---|-------------|-------------|-------------|---|-------------|-------------|-------------|
| N | 3.23854300  | -0.03777500 | 0.34172600  | C | -0.24696500 | -5.59318500 | -3.22341300 |
| H | 0.52320500  | 1.64929100  | -3.15616000 | H | 1.85912200  | -5.16604000 | -3.22963700 |
| C | 1.62647200  | 4.74009300  | -3.09328600 | C | -1.42922900 | -5.04365300 | -1.19379800 |
| H | 2.49315400  | 5.35986200  | -2.84049700 | H | -0.24762500 | -4.17914600 | 0.38371800  |
| C | 0.59651200  | 4.64288800  | -1.98982400 | C | -1.43590000 | -5.55594100 | -2.49329000 |
| C | 0.21564300  | 3.31726000  | -1.75742700 | H | -0.24075200 | -5.98559500 | -4.23602800 |
| C | -0.77494100 | 3.00017200  | -0.83471100 | H | -2.34498600 | -5.03357500 | -0.61023700 |
| C | -1.36621800 | 4.02595200  | -0.07933600 | H | -2.35781700 | -5.92795200 | -2.93020900 |
| C | -0.95482900 | 5.35370600  | -0.29594500 | C | -2.37124000 | 3.71113900  | 0.96249100  |
| C | 0.00907600  | 5.67036200  | -1.25372900 | C | -3.41690000 | 2.80847800  | 0.71384300  |
| H | -1.05692100 | 1.96797500  | -0.65415600 | C | -2.28475000 | 4.30815200  | 2.23014800  |
| H | -1.42319000 | 6.14823000  | 0.27686300  | C | -4.35974600 | 2.52636900  | 1.70204900  |
| H | 0.28930000  | 6.70647000  | -1.42254600 | H | -3.50285400 | 2.35133000  | -0.26770600 |
| H | 1.18840300  | 5.16558700  | -4.00474900 | C | -3.21824900 | 4.01373100  | 3.22246500  |
| C | 2.21189600  | -2.95955300 | 0.04860600  | H | -1.46579900 | 4.98987600  | 2.44093900  |
| C | 2.21641000  | -4.11543900 | -0.74768300 | C | -4.26187600 | 3.12507300  | 2.95910300  |
| C | 3.44240900  | -4.76393900 | -0.98992100 | H | -5.17835700 | 1.84752400  | 1.49524400  |
| C | 4.64261500  | -4.27855800 | -0.46907000 | H | -3.13099000 | 4.47877300  | 4.20007300  |
| C | 4.62885200  | -3.11293600 | 0.29593600  | H | -4.99814400 | 2.90076900  | 3.72496200  |
| C | 3.41365400  | -2.46824100 | 0.54396300  | C | 5.78550000  | -2.37088100 | 0.93151200  |
| H | 1.28126600  | -2.43719100 | 0.24179800  | H | 6.15254400  | -2.89050900 | 1.82567800  |
| H | 3.45015800  | -5.67233600 | -1.58405400 | H | 6.64368100  | -2.23559300 | 0.26533700  |
| H | 5.57272800  | -4.80246800 | -0.67024000 | C | 4.57613200  | 3.31501100  | 0.58058000  |
| C | 0.95688000  | -4.61275400 | -1.34860500 | C | 3.50064200  | 4.20060000  | 0.41980000  |
| C | 0.93922900  | -5.13364000 | -2.65289100 | C | 4.96968400  | 2.96670300  | 1.87829500  |
| C | -0.24843200 | -4.56415300 | -0.63060000 | C | 2.83535400  | 4.72596100  | 1.52586100  |

|    |            |             |             |   |             |             |             |
|----|------------|-------------|-------------|---|-------------|-------------|-------------|
| H  | 3.18642400 | 4.49045200  | -0.57678300 | H | 2.42792900  | 1.67462900  | 3.84166100  |
| C  | 4.31550100 | 3.50316100  | 2.98924000  | H | 4.11990600  | 0.70191900  | 5.30437600  |
| H  | 5.80611500 | 2.28679900  | 2.01729500  | H | 4.03497600  | -1.73991000 | 5.85879600  |
| C  | 3.24579000 | 4.38305000  | 2.81611100  | H | 2.19614200  | -3.12092300 | 4.95194500  |
| H  | 1.99942500 | 5.40248700  | 1.37465400  | O | 0.32202800  | -0.27161100 | 1.35821500  |
| H  | 4.65045800 | 3.24260700  | 3.98942600  | I | -0.20942800 | -2.90848500 | 3.21671200  |
| H  | 2.73962700 | 4.80315400  | 3.68033600  | C | -1.09593400 | 0.63821700  | 3.13692600  |
| C  | 4.35140300 | 0.02030000  | -3.30391200 | H | -1.50445100 | -0.33789500 | 3.39885200  |
| C  | 3.86390400 | -1.21228200 | -2.85001200 | H | -1.08262800 | 1.25940200  | 4.03722600  |
| C  | 3.87456600 | 0.52501600  | -4.52050400 | H | -1.76342500 | 1.11038200  | 2.41065600  |
| C  | 2.88748200 | -1.89845700 | -3.57123400 | C | 0.77739100  | 1.94894500  | 2.15750200  |
| H  | 4.23545100 | -1.64101200 | -1.92585800 | H | 0.74953300  | 2.64635300  | 2.99860700  |
| C  | 2.90787400 | -0.16682500 | -5.25177000 | H | 1.78702200  | 1.94778400  | 1.74076100  |
| H  | 4.25953300 | 1.47152400  | -4.89032000 | H | 0.09331500  | 2.32864200  | 1.40052600  |
| C  | 2.39994800 | -1.37371000 | -4.76892200 | C | -1.33669900 | -0.66590700 | -1.38954300 |
| H  | 2.50163600 | -2.83611200 | -3.18998100 | O | -0.08910000 | -0.45721300 | -1.57620900 |
| H  | 2.55512500 | 0.23529400  | -6.19741700 | N | -1.76886800 | -0.66755900 | -0.13417000 |
| H  | 1.63651000 | -1.90815800 | -5.32594900 | H | -0.60839900 | -0.41550600 | 0.94736300  |
| Cu | 1.36660500 | 0.12563100  | -0.37559000 | C | -2.17410500 | -0.80997100 | -2.67668200 |
| C  | 1.27258500 | -1.49446500 | 3.88675200  | C | -3.17271900 | -1.97732700 | -2.61420700 |
| C  | 1.30170200 | -0.13211700 | 3.53634300  | C | -2.92202400 | 0.52282300  | -2.88867700 |
| C  | 2.35133500 | 0.62469000  | 4.08752900  | C | -1.22669500 | -1.06439800 | -3.86509900 |
| C  | 3.32799200 | 0.07097800  | 4.91158600  | H | -2.66331600 | -2.91598700 | -2.37705900 |
| C  | 3.28308700 | -1.28546500 | 5.22076700  | H | -3.96439900 | -1.80145300 | -1.88704300 |
| C  | 2.24662500 | -2.06557200 | 4.71047600  | H | -3.65171400 | -2.09055000 | -3.59256800 |
| C  | 0.32448400 | 0.54367400  | 2.56153200  | H | -2.22230300 | 1.36284100  | -2.96319900 |

|   |             |             |             |
|---|-------------|-------------|-------------|
| H | -3.50876600 | 0.48051700  | -3.81232300 |
| H | -3.61582100 | 0.72496700  | -2.07007500 |
| H | -1.82022100 | -1.13966300 | -4.78299800 |
| H | -0.49465000 | -0.26409300 | -3.98739800 |
| H | -0.67385800 | -1.99938100 | -3.73204300 |
| S | -3.37190400 | -0.75854600 | 0.44777300  |
| C | -3.51582000 | -2.54384600 | 0.79323100  |
| H | -3.57284500 | -3.11723900 | -0.13268700 |
| H | -2.63810300 | -2.84405200 | 1.36823600  |
| H | -4.41897700 | -2.70157100 | 1.38653400  |
| C | -6.78368900 | -0.54670600 | -3.67838000 |
| C | -6.50969200 | -0.96677600 | -2.38428800 |
| C | -6.20344200 | -0.01774500 | -1.37909000 |
| C | -6.17060000 | 1.35940600  | -1.71831500 |
| C | -6.44797300 | 1.76325800  | -3.01654600 |
| C | -6.75019800 | 0.81527700  | -4.00149500 |
| H | -7.02994500 | -1.27931000 | -4.44082200 |
| H | -6.53624500 | -2.02028600 | -2.12673700 |
| H | -5.93840800 | 2.08885000  | -0.94927800 |
| H | -6.43428600 | 2.81997400  | -3.26520600 |
| H | -6.96593100 | 1.13691400  | -5.01562400 |
| C | -5.87019900 | -0.41989500 | -0.07095000 |
| C | -6.30848000 | -0.50432700 | 1.16246400  |
| H | -5.67689000 | -0.78054100 | 2.00572500  |
| C | -7.71017300 | -0.12628800 | 1.57279200  |
| F | -8.50525700 | 0.14522700  | 0.52845100  |

|                |             |             |             |
|----------------|-------------|-------------|-------------|
| F              | -8.28103900 | -1.10865200 | 2.29606900  |
| F              | -7.66351100 | 0.97699300  | 2.35903100  |
| <b>FavInt5</b> |             |             |             |
| C              | -0.94510200 | 1.78151800  | -2.39829400 |
| C              | -0.69403500 | 2.78912700  | -3.55454100 |
| C              | 1.03848400  | 2.73431800  | -2.08410700 |
| H              | -0.49344700 | 2.32866800  | -4.52322900 |
| C              | 2.40681200  | 3.21128000  | -1.66051700 |
| C              | 3.00404900  | 2.48923000  | -0.47459400 |
| C              | 4.65601400  | 2.27680500  | 1.07539100  |
| C              | 3.65640400  | 1.09186800  | 1.13674400  |
| H              | 4.59853800  | 2.96221300  | 1.92343200  |
| H              | 3.21016200  | 0.94161200  | 2.11493900  |
| C              | 2.32247100  | 4.73742300  | -1.31573400 |
| H              | 3.34296900  | 5.09357100  | -1.15911700 |
| H              | 1.92298400  | 5.24620700  | -2.19621900 |
| C              | 3.37117200  | 2.99871100  | -2.89070900 |
| H              | 3.09590300  | 3.73832000  | -3.64654400 |
| H              | 4.38515800  | 3.22755900  | -2.55266500 |
| O              | 0.54322700  | 3.43728400  | -3.13605200 |
| O              | 4.19486700  | 3.01771400  | -0.09379700 |
| N              | 0.31571400  | 1.78343000  | -1.63148300 |
| N              | 2.59717200  | 1.46311200  | 0.17276400  |
| H              | -1.15536500 | 0.76579200  | -2.74109600 |
| C              | -1.85932800 | 3.78854000  | -3.56537400 |

|   |             |             |             |   |             |             |             |
|---|-------------|-------------|-------------|---|-------------|-------------|-------------|
| H | -1.49991800 | 4.81202700  | -3.71371500 | H | 3.33106700  | -3.91847400 | 1.39693700  |
| C | -2.54404100 | 3.56417000  | -2.23546100 | C | 3.53098500  | -6.30849800 | -1.01628100 |
| C | -2.07442200 | 2.40508500  | -1.60961600 | H | 4.62945300  | -6.10482200 | -2.86058200 |
| C | -2.59288200 | 1.98063700  | -0.39332500 | H | 2.55405300  | -6.21576900 | 0.90391000  |
| C | -3.60927100 | 2.73059300  | 0.21767200  | H | 3.19002800  | -7.31632700 | -1.23412500 |
| C | -4.05798900 | 3.91070500  | -0.39852500 | C | -4.21790100 | 2.25761600  | 1.48298400  |
| C | -3.53365000 | 4.33060200  | -1.62244400 | C | -4.66683400 | 0.93189600  | 1.58592900  |
| H | -2.18676300 | 1.10827300  | 0.10667700  | C | -4.37007700 | 3.10525200  | 2.58913700  |
| H | -4.85033800 | 4.48432700  | 0.07344300  | C | -5.25764700 | 0.46586600  | 2.75967500  |
| H | -3.90575700 | 5.23682000  | -2.09215700 | H | -4.57180400 | 0.28361500  | 0.72287600  |
| H | -2.53669200 | 3.56084400  | -4.39822100 | C | -4.94573000 | 2.63555200  | 3.77005300  |
| C | 3.99638500  | -1.37654200 | 0.38132800  | H | -4.01553200 | 4.13012300  | 2.52621400  |
| C | 4.88644800  | -2.32812400 | -0.14278200 | C | -5.39320400 | 1.31588200  | 3.85971200  |
| C | 6.22162300  | -1.95613500 | -0.38446000 | H | -5.62629600 | -0.55515000 | 2.81124800  |
| C | 6.68088100  | -0.67068400 | -0.09914400 | H | -5.04607400 | 3.30161400  | 4.62196300  |
| C | 5.79233900  | 0.26380300  | 0.42975400  | H | -5.85015900 | 0.95562100  | 4.77636600  |
| C | 4.45906300  | -0.09472800 | 0.65604400  | C | 6.05724900  | 1.69831200  | 0.83042400  |
| H | 2.94927200  | -1.62823300 | 0.51292100  | H | 6.65221900  | 1.75208100  | 1.75112800  |
| H | 6.91109800  | -2.69635800 | -0.77888900 | H | 6.59211900  | 2.27702200  | 0.07019200  |
| H | 7.71893100  | -0.40920300 | -0.28484700 | C | 1.46779400  | 5.02719800  | -0.10239700 |
| C | 4.42368800  | -3.70217000 | -0.44624700 | C | 0.07469300  | 5.12374900  | -0.21752500 |
| C | 4.79081600  | -4.34072000 | -1.64114100 | C | 2.04854600  | 5.18959600  | 1.16230200  |
| C | 3.60578600  | -4.39360200 | 0.46081400  | C | -0.72004800 | 5.38078700  | 0.89854100  |
| C | 4.34325900  | -5.63007500 | -1.92657000 | H | -0.39311500 | 5.00947600  | -1.18904300 |
| H | 5.41526500  | -3.81453600 | -2.35770100 | C | 1.25736900  | 5.45764400  | 2.28081500  |
| C | 3.16936900  | -5.68733300 | 0.18102800  | H | 3.12867100  | 5.12831700  | 1.26249300  |

|    |             |             |             |   |             |             |             |
|----|-------------|-------------|-------------|---|-------------|-------------|-------------|
| C  | -0.12923500 | 5.55639100  | 2.15108000  | H | 3.32129400  | -1.94265100 | 4.15130900  |
| H  | -1.79729300 | 5.44591500  | 0.78113500  | O | -0.46459000 | 0.23296600  | 1.51654700  |
| H  | 1.72589300  | 5.60345600  | 3.25039800  | I | 0.72925000  | -2.60840800 | 2.84809900  |
| H  | -0.74444700 | 5.77007900  | 3.02038600  | C | -1.50751800 | 0.24291300  | 3.73270100  |
| C  | 3.27712300  | 1.60385200  | -3.46337100 | H | -1.43255700 | -0.83783800 | 3.87733400  |
| C  | 3.90786500  | 0.52155100  | -2.83719300 | H | -1.46362700 | 0.71359800  | 4.71939700  |
| C  | 2.49203400  | 1.36086800  | -4.59807900 | H | -2.47596200 | 0.48137800  | 3.28449600  |
| C  | 3.73796500  | -0.77601100 | -3.31826700 | C | -0.59583600 | 2.28251100  | 2.61160900  |
| H  | 4.53732200  | 0.68622000  | -1.96975300 | H | -0.65453000 | 2.84422400  | 3.54633800  |
| C  | 2.32883200  | 0.06520000  | -5.08915100 | H | 0.19752500  | 2.70236300  | 1.98992100  |
| H  | 2.01476300  | 2.19685300  | -5.10213900 | H | -1.54100700 | 2.41341000  | 2.08738700  |
| C  | 2.94755100  | -1.00781800 | -4.44502500 | C | -0.31454500 | -2.29772100 | -0.78723200 |
| H  | 4.22021600  | -1.60244000 | -2.80837100 | O | 0.65221900  | -1.51680300 | -0.78741600 |
| H  | 1.72974000  | -0.10405200 | -5.97969400 | N | -1.40017500 | -1.92365100 | -0.02926700 |
| H  | 2.82591900  | -2.01758000 | -4.82576500 | H | -0.81962200 | -0.67602600 | 1.45008400  |
| Cu | 0.87866200  | 0.44434100  | -0.15913100 | C | -0.19348100 | -3.59571500 | -1.62077600 |
| C  | 1.61578500  | -0.77027400 | 3.55460300  | C | -0.21033900 | -4.82393300 | -0.68423500 |
| C  | 1.00033900  | 0.49092900  | 3.47786800  | C | -1.31987200 | -3.68421100 | -2.67391600 |
| C  | 1.72088800  | 1.55353700  | 4.05787800  | C | 1.15337600  | -3.56685400 | -2.36314100 |
| C  | 2.96617600  | 1.38568800  | 4.65868700  | H | 0.56376100  | -4.72997000 | 0.08226700  |
| C  | 3.55732400  | 0.12555200  | 4.68565300  | H | -1.17590100 | -4.97925800 | -0.19477100 |
| C  | 2.87590800  | -0.95505100 | 4.13013700  | H | 0.01312100  | -5.72442100 | -1.26565700 |
| C  | -0.37841700 | 0.78623400  | 2.84775900  | H | -1.36607600 | -2.77297000 | -3.28070200 |
| H  | 1.30346500  | 2.55054500  | 4.02223100  | H | -1.11409900 | -4.52256600 | -3.34734700 |
| H  | 3.47195700  | 2.24259100  | 5.09334700  | H | -2.31173600 | -3.85935800 | -2.24725400 |
| H  | 4.53293700  | -0.02731600 | 5.13647500  | H | 1.26232100  | -4.48524000 | -2.94938600 |

|   |             |             |             |                 |            |             |             |
|---|-------------|-------------|-------------|-----------------|------------|-------------|-------------|
| H | 1.21397700  | -2.70784900 | -3.03537500 | <b>Disflnt5</b> |            |             |             |
| H | 1.99001400  | -3.50313200 | -1.66788000 | C               | 1.39919000 | 2.55488400  | -2.63498400 |
| S | -2.74806300 | -2.86163200 | 0.06860100  | C               | 2.54009700 | 3.35469900  | -3.33288400 |
| C | -3.30587100 | -2.46433600 | 1.74861800  | C               | 3.36431700 | 1.87707800  | -1.81035900 |
| H | -2.61935400 | -2.96259700 | 2.43489600  | H               | 2.64541600 | 3.15783700  | -4.40023600 |
| H | -3.27082600 | -1.38331800 | 1.88357200  | C               | 4.54567100 | 1.20656400  | -1.14274000 |
| H | -4.32060000 | -2.84709200 | 1.86832400  | C               | 4.19822400 | 0.18223700  | -0.08522600 |
| C | -7.74828600 | -2.22656300 | -0.22472000 | C               | 4.82322800 | -1.27858000 | 1.54266900  |
| C | -6.48413300 | -1.68892500 | -0.45076900 | C               | 3.28876600 | -1.31590300 | 1.29880700  |
| C | -5.39297900 | -2.53832000 | -0.70475700 | H               | 5.11289800 | -0.86588400 | 2.51008800  |
| C | -5.59219300 | -3.93026400 | -0.71942200 | H               | 2.69266300 | -1.08504200 | 2.17968600  |
| C | -6.86110600 | -4.45990600 | -0.49623900 | C               | 5.44476200 | 2.30323900  | -0.47926200 |
| C | -7.94010400 | -3.61002000 | -0.24515600 | H               | 6.37012700 | 1.81910600  | -0.16002300 |
| H | -8.58471600 | -1.56271300 | -0.02996100 | H               | 5.69915300 | 3.03087000  | -1.25348800 |
| H | -6.33995500 | -0.61541100 | -0.43117500 | C               | 5.34653800 | 0.46778300  | -2.28234100 |
| H | -4.76101100 | -4.59595300 | -0.93274100 | H               | 5.73005200 | 1.23431900  | -2.96027400 |
| H | -7.00769800 | -5.53503800 | -0.52405400 | H               | 6.20103200 | -0.02405600 | -1.81050200 |
| H | -8.92761700 | -4.02442300 | -0.06765600 | O               | 3.74287500 | 2.83518000  | -2.69634100 |
| C | -4.04608900 | -1.97799000 | -0.88889600 | O               | 5.29257500 | -0.33336900 | 0.53189600  |
| C | -3.61048800 | -0.95374300 | -1.62417000 | N               | 2.11223100 | 1.64466000  | -1.71334900 |
| H | -2.57142000 | -0.65247000 | -1.54175700 | N               | 3.06235700 | -0.27134200 | 0.27951200  |
| C | -4.44544000 | -0.14275000 | -2.57079500 | H               | 0.78968600 | 1.94941800  | -3.31182600 |
| F | -5.37124100 | -0.87451400 | -3.21141900 | C               | 2.33668100 | 4.84643000  | -3.00197000 |
| F | -5.09099700 | 0.86508700  | -1.93824400 | H               | 3.26758900 | 5.29164700  | -2.63534700 |
| F | -3.64738900 | 0.42189900  | -3.50744000 | C               | 1.21229400 | 4.85588300  | -1.98881300 |
|   |             |             |             | C               | 0.62132700 | 3.59484600  | -1.86741100 |

|   |             |             |             |   |             |             |             |
|---|-------------|-------------|-------------|---|-------------|-------------|-------------|
| C | -0.47643100 | 3.38588700  | -1.04152900 | H | -2.79285500 | -5.32145600 | -0.00402600 |
| C | -0.97288100 | 4.45124700  | -0.27255300 | H | -2.81902500 | -6.57560600 | -2.14899900 |
| C | -0.35115000 | 5.70868200  | -0.37044400 | C | -2.10769100 | 4.23121500  | 0.65417200  |
| C | 0.72538600  | 5.92187400  | -1.23318700 | C | -3.25284400 | 3.54603400  | 0.22259200  |
| H | -0.90855500 | 2.39375800  | -0.93855400 | C | -2.05390400 | 4.68094000  | 1.98221800  |
| H | -0.74220800 | 6.53506200  | 0.21552400  | C | -4.31389600 | 3.30552500  | 1.09498200  |
| H | 1.17024100  | 6.90990300  | -1.31375900 | H | -3.32355600 | 3.24959700  | -0.81770200 |
| H | 2.05598500  | 5.40169900  | -3.90550400 | C | -3.11035900 | 4.43508900  | 2.85830800  |
| C | 1.81658200  | -3.19563400 | 0.27224900  | H | -1.16645800 | 5.20032000  | 2.33210200  |
| C | 1.78113600  | -4.48229000 | -0.28893200 | C | -4.24120500 | 3.74265500  | 2.41940700  |
| C | 2.97239200  | -5.22930800 | -0.35510400 | H | -5.20597200 | 2.80584300  | 0.73152300  |
| C | 4.17915800  | -4.72146300 | 0.12674800  | H | -3.04948600 | 4.78129900  | 3.88596000  |
| C | 4.20270500  | -3.44295400 | 0.68193300  | H | -5.06757100 | 3.56057600  | 3.10028300  |
| C | 3.02421800  | -2.69377300 | 0.74358700  | C | 5.37381500  | -2.69185500 | 1.27947900  |
| H | 0.92029500  | -2.58525900 | 0.30928000  | H | 5.70413900  | -3.15170000 | 2.21917700  |
| H | 2.94277400  | -6.23367000 | -0.76658500 | H | 6.24892200  | -2.65054700 | 0.62188000  |
| H | 5.08227300  | -5.32312400 | 0.07334000  | C | 4.77626300  | 2.98290000  | 0.69572000  |
| C | 0.51450100  | -5.05012600 | -0.80707400 | C | 3.83694700  | 4.00418800  | 0.49601200  |
| C | 0.48847200  | -5.78442000 | -2.00340500 | C | 5.06742600  | 2.58989900  | 2.00803700  |
| C | -0.68863400 | -4.87590600 | -0.10403100 | C | 3.20809600  | 4.62120700  | 1.57562400  |
| C | -0.70316900 | -6.32305500 | -2.48721300 | H | 3.60255900  | 4.32749800  | -0.51143700 |
| H | 1.40649900  | -5.91416100 | -2.56895800 | C | 4.44941300  | 3.21419800  | 3.09342300  |
| C | -1.87807900 | -5.42534000 | -0.58239100 | H | 5.79700700  | 1.80306900  | 2.17712000  |
| H | -0.67451700 | -4.33849300 | 0.83815300  | C | 3.51839100  | 4.23225400  | 2.88047400  |
| C | -1.89285000 | -6.14620000 | -1.77896700 | H | 2.47778600  | 5.40379200  | 1.39249800  |
| H | -0.70260500 | -6.87966800 | -3.41971800 | H | 4.70651500  | 2.91374500  | 4.10561800  |

|    |             |             |             |   |             |             |             |
|----|-------------|-------------|-------------|---|-------------|-------------|-------------|
| H  | 3.04218700  | 4.72205400  | 3.72500300  | C | -1.31889900 | 1.22165800  | 2.88958300  |
| C  | 4.48141300  | -0.52545200 | -3.02126600 | H | -1.89336800 | 0.34160100  | 3.18071900  |
| C  | 4.29023700  | -1.81575200 | -2.51420400 | H | -1.27935700 | 1.90173800  | 3.74480700  |
| C  | 3.78206900  | -0.14652100 | -4.17439800 | H | -1.84724900 | 1.73675200  | 2.08142100  |
| C  | 3.40232100  | -2.70026500 | -3.12440700 | C | 0.82597300  | 2.16353500  | 2.04414600  |
| H  | 4.83457600  | -2.13330100 | -1.63158400 | H | 0.86685000  | 2.87845800  | 2.87003300  |
| C  | 2.89705200  | -1.02971000 | -4.79295400 | H | 1.84201200  | 1.96497800  | 1.69786900  |
| H  | 3.93992300  | 0.84475400  | -4.59145500 | H | 0.27944300  | 2.63263400  | 1.22763300  |
| C  | 2.69918800  | -2.30701000 | -4.26397900 | C | -1.43888200 | -0.93692600 | -1.58089800 |
| H  | 3.26425600  | -3.69068100 | -2.70432600 | O | -0.23660000 | -0.65083800 | -1.70442000 |
| H  | 2.36992700  | -0.72485900 | -5.69281600 | N | -2.00627200 | -0.51760700 | -0.39086100 |
| H  | 2.01183200  | -2.99644900 | -4.74527600 | H | -0.81889700 | -0.04514400 | 0.84184300  |
| Cu | 1.25239500  | 0.21262100  | -0.54201400 | C | -2.05738200 | -1.63774000 | -2.81947800 |
| C  | 0.58897900  | -1.26093900 | 3.85172400  | C | -3.41393000 | -2.32610300 | -2.64412500 |
| C  | 0.87656200  | 0.06647000  | 3.49236100  | C | -2.16460200 | -0.56439000 | -3.93114100 |
| C  | 2.00459300  | 0.63695700  | 4.10871100  | C | -1.03629600 | -2.70539400 | -3.27121500 |
| C  | 2.81147800  | -0.06571000 | 5.00055300  | H | -3.34180100 | -3.17620600 | -1.96199300 |
| C  | 2.50945000  | -1.38784800 | 5.31328900  | H | -4.20287400 | -1.64605900 | -2.31700200 |
| C  | 1.38699100  | -1.98410600 | 4.73996700  | H | -3.72455500 | -2.72591200 | -3.61494100 |
| C  | 0.10442700  | 0.87147600  | 2.43257100  | H | -1.21869100 | -0.02674600 | -4.03955400 |
| H  | 2.28188000  | 1.65182900  | 3.85848700  | H | -2.39033800 | -1.05899400 | -4.88169200 |
| H  | 3.67560700  | 0.42275500  | 5.44122500  | H | -2.96561700 | 0.15786200  | -3.74630200 |
| H  | 3.12821900  | -1.95661000 | 6.00067100  | H | -1.41755300 | -3.21576800 | -4.16214500 |
| H  | 1.13564000  | -3.00990000 | 4.98272700  | H | -0.07192400 | -2.25197200 | -3.50236600 |
| O  | 0.07568200  | 0.03488200  | 1.25628100  | H | -0.88373100 | -3.45339500 | -2.49184200 |
| I  | -1.09258700 | -2.39904400 | 3.10147000  | S | -3.42247000 | -0.69637600 | 0.37340000  |

|   |             |             |             |
|---|-------------|-------------|-------------|
| C | -4.06360700 | -2.42433300 | 0.46193200  |
| H | -4.77321500 | -2.64361300 | -0.33182600 |
| H | -3.18651100 | -3.06895100 | 0.39798700  |
| H | -4.53598800 | -2.51492400 | 1.44139100  |
| C | -7.52129700 | -0.19085700 | 2.04361400  |
| C | -6.27852900 | 0.06366500  | 1.46822500  |
| C | -6.10152000 | -0.09318100 | 0.08247500  |
| C | -7.17709900 | -0.51578500 | -0.71397300 |
| C | -8.41564800 | -0.77012600 | -0.12936300 |
| C | -8.58927600 | -0.61123900 | 1.24731300  |
| H | -7.65769000 | -0.05554900 | 3.11198300  |
| H | -5.45445600 | 0.41459700  | 2.08306200  |
| H | -7.03887600 | -0.63209400 | -1.78347000 |
| H | -9.24563300 | -1.09343900 | -0.74966400 |
| H | -9.55605900 | -0.81125400 | 1.69863100  |
| C | -4.78034800 | 0.13632200  | -0.52200900 |
| C | -4.42137900 | 0.91459800  | -1.54144100 |
| H | -3.38505000 | 0.95497700  | -1.85219900 |
| C | -5.34605900 | 1.77688800  | -2.34539600 |
| F | -6.33055200 | 2.32653400  | -1.61297100 |
| F | -4.64356300 | 2.77837400  | -2.91632500 |
| F | -5.92302900 | 1.07040300  | -3.34644900 |

## 8. $^1\text{H}$ , $^{13}\text{C}$ and $^{19}\text{F}$ NMR Spectra of Title Compounds

### $^1\text{H}$ NMR Spectrum of **1s**

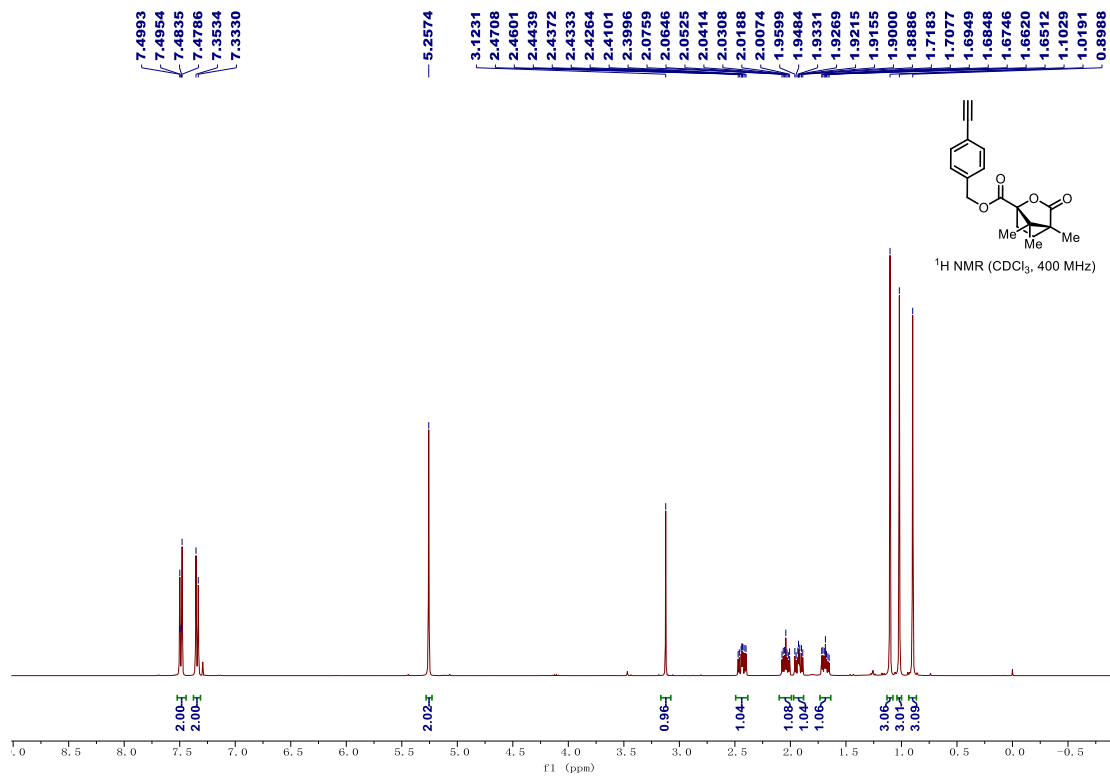

### $^{13}\text{C}$ NMR Spectrum of **1s**

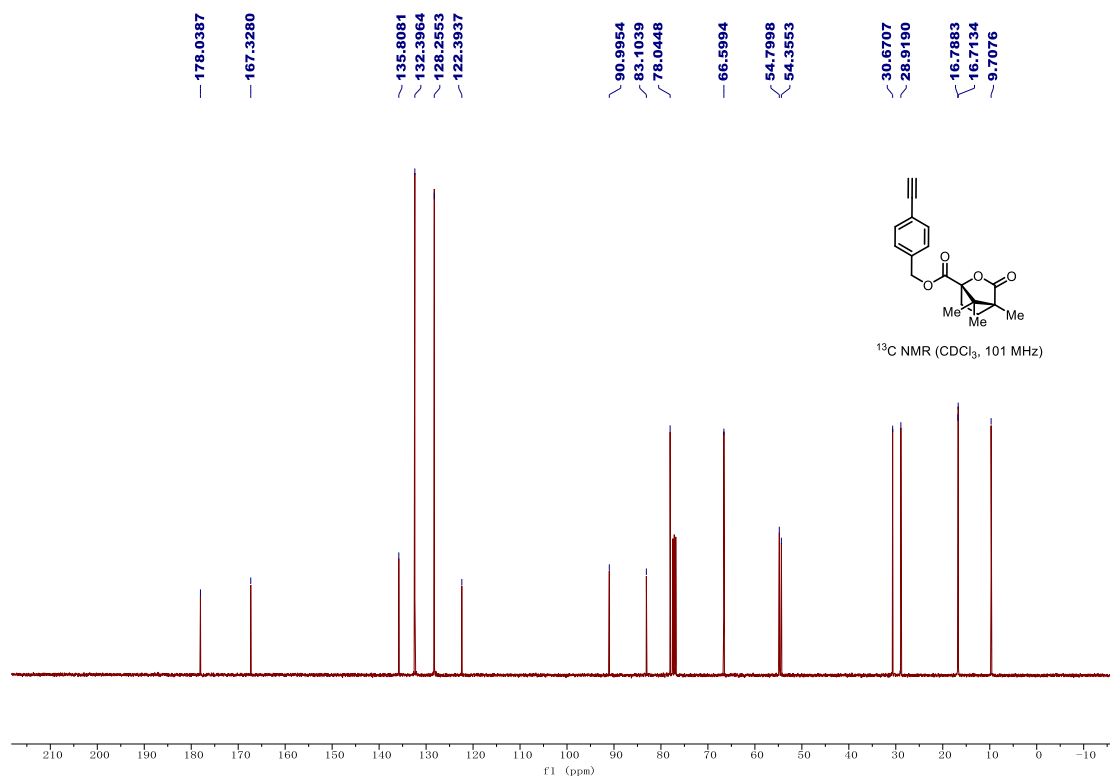

### <sup>1</sup>H NMR Spectrum of 1t

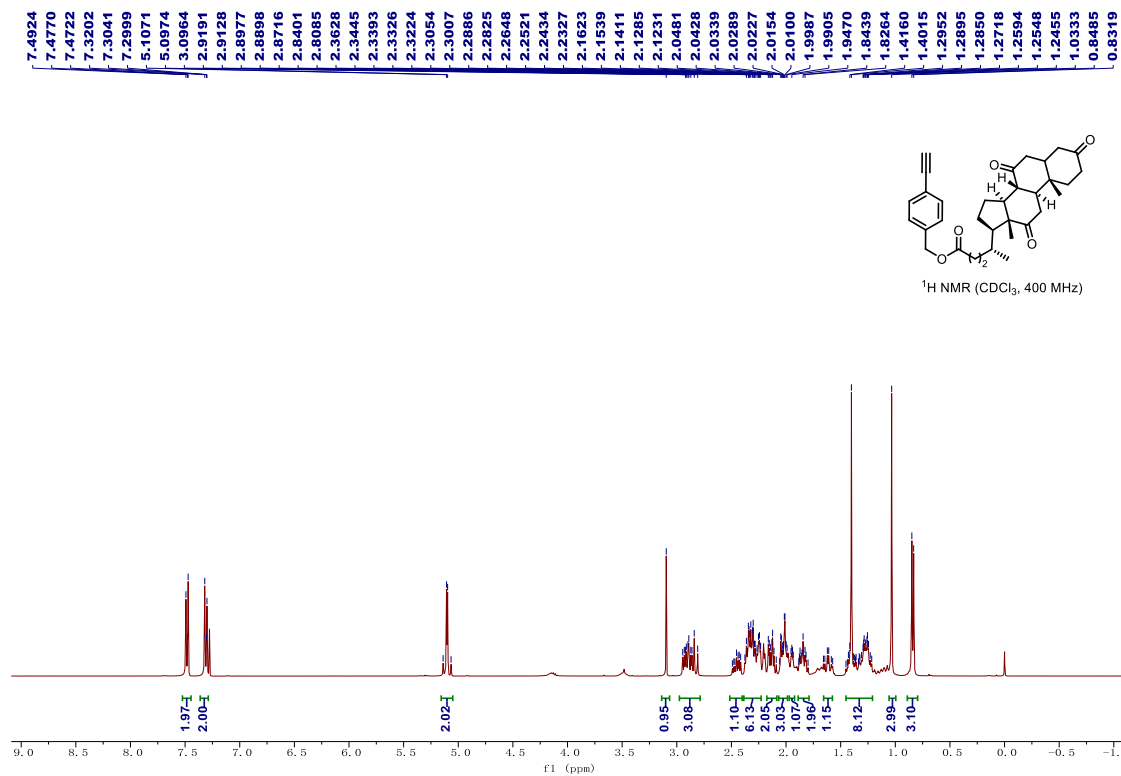

### <sup>13</sup>C NMR Spectrum of 1t

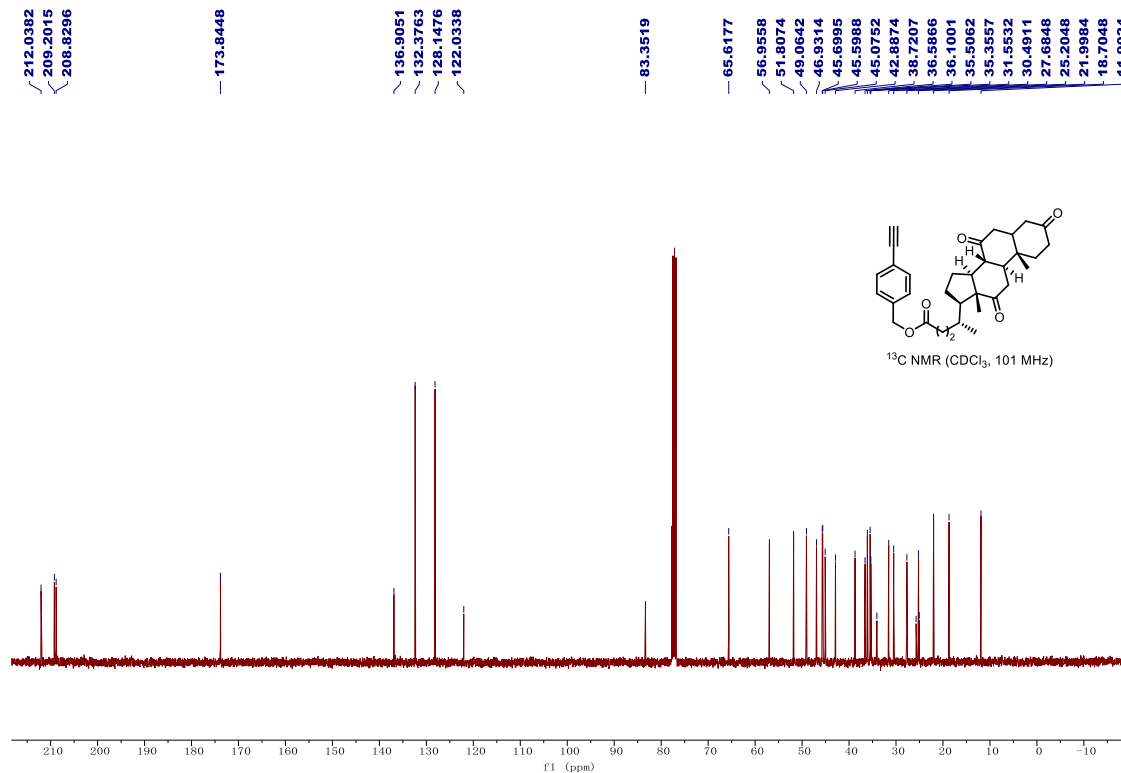

### <sup>1</sup>H NMR Spectrum of 3n

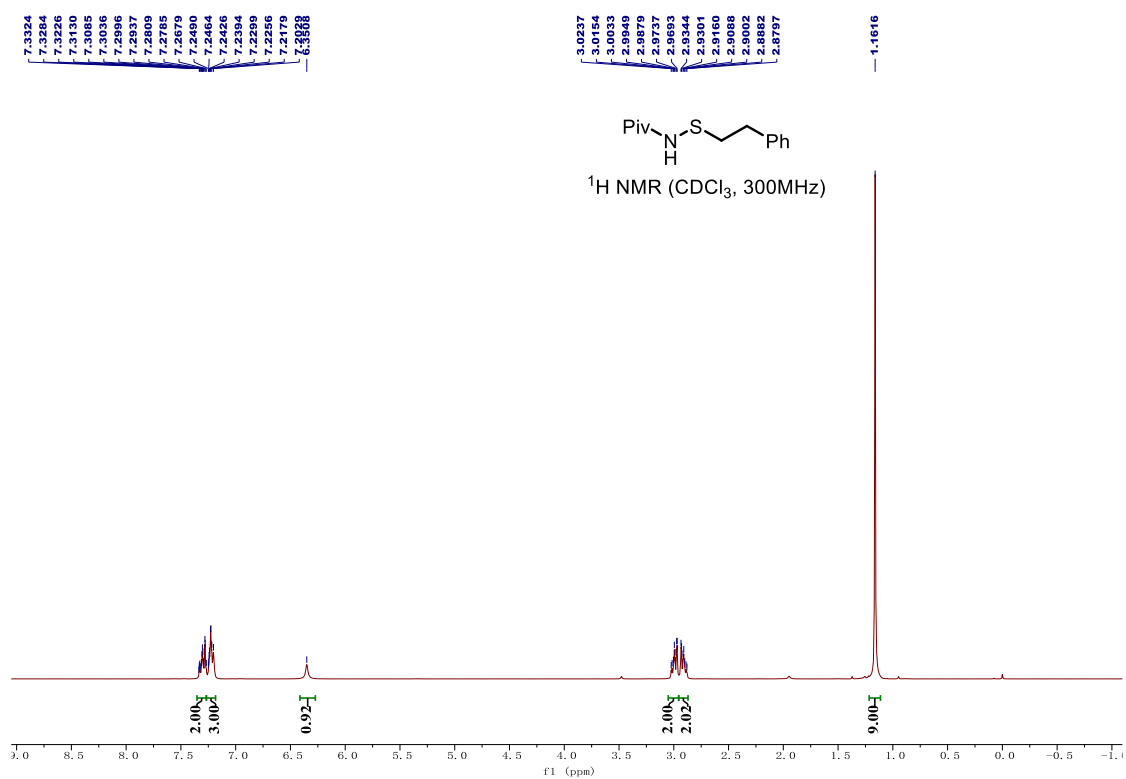

### <sup>13</sup>C NMR Spectrum of 3n

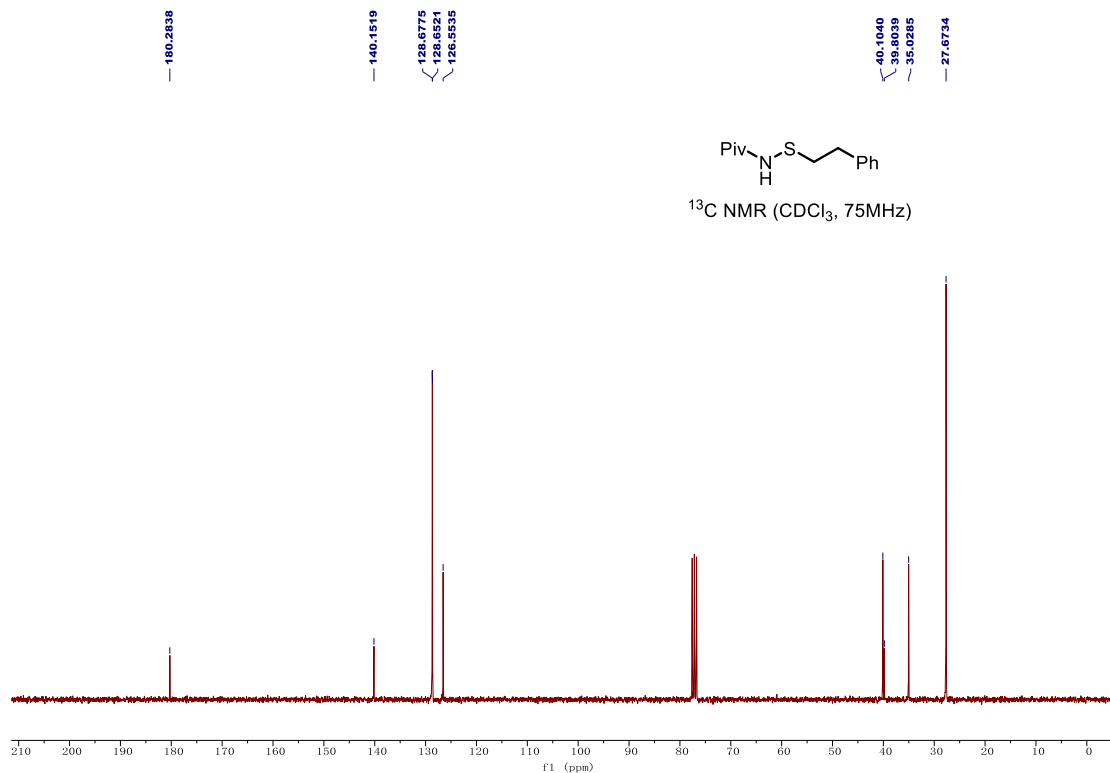

### <sup>1</sup>H NMR Spectrum of 3o

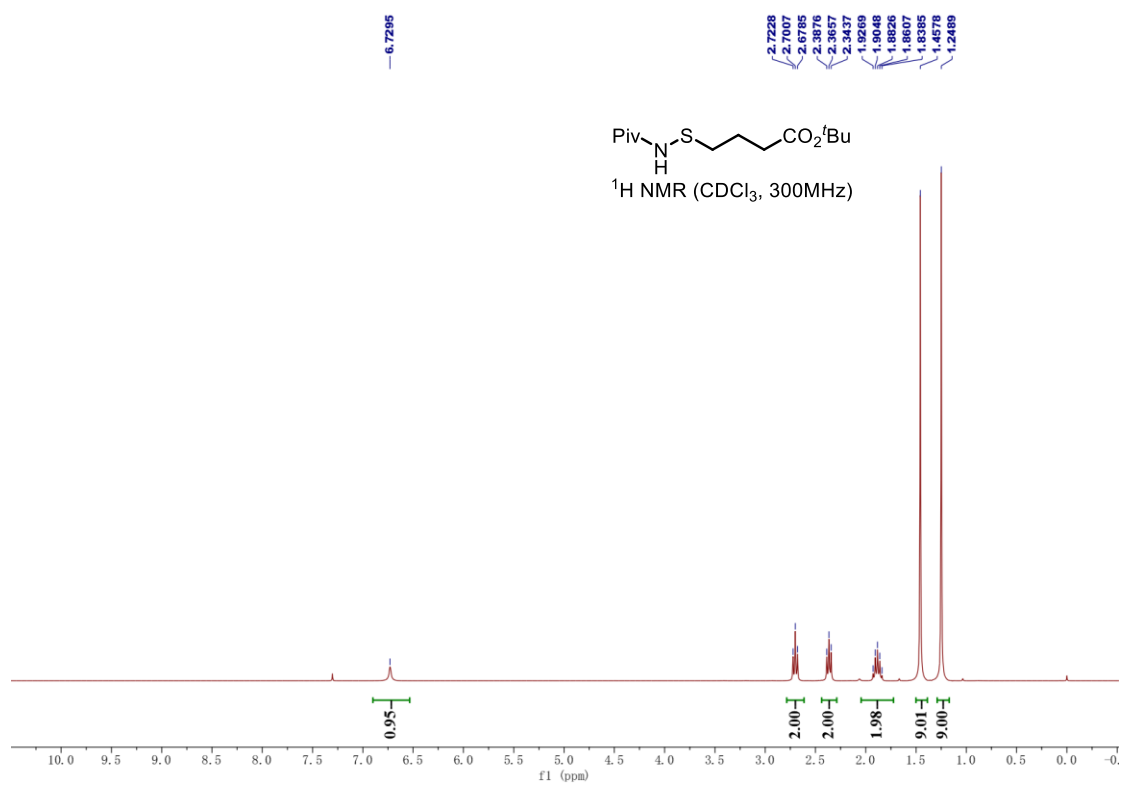

### <sup>13</sup>C NMR Spectrum of 3o

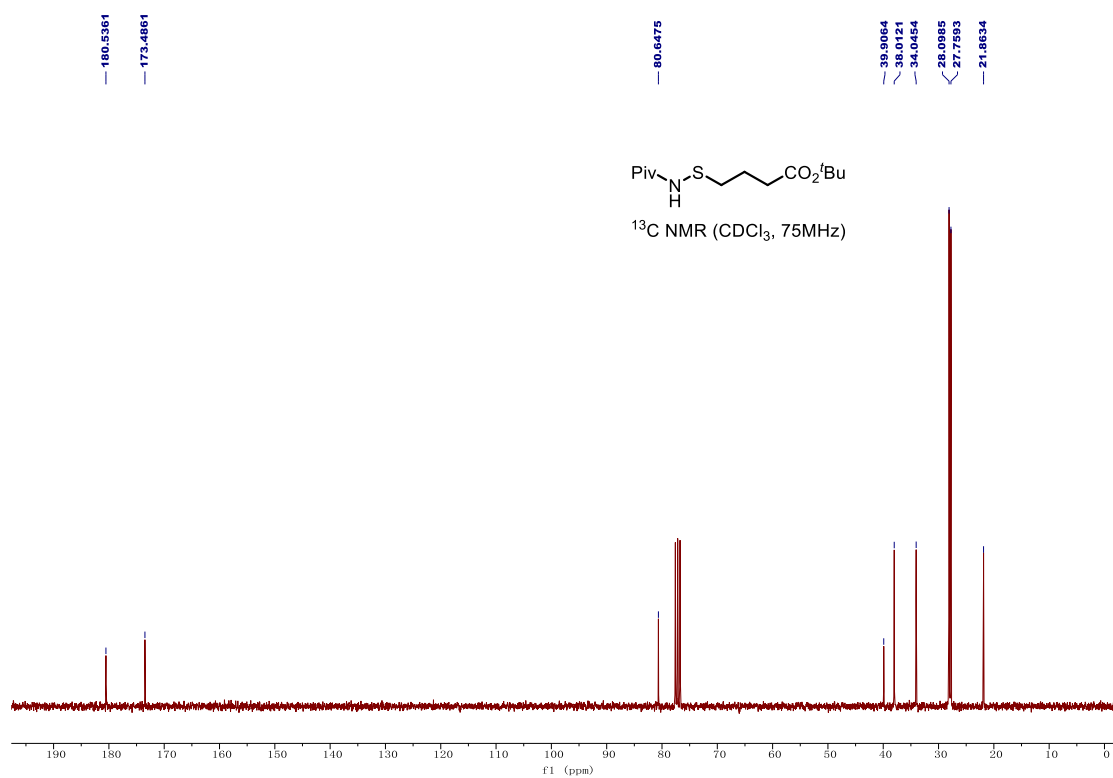

### <sup>1</sup>H NMR Spectrum of 3p

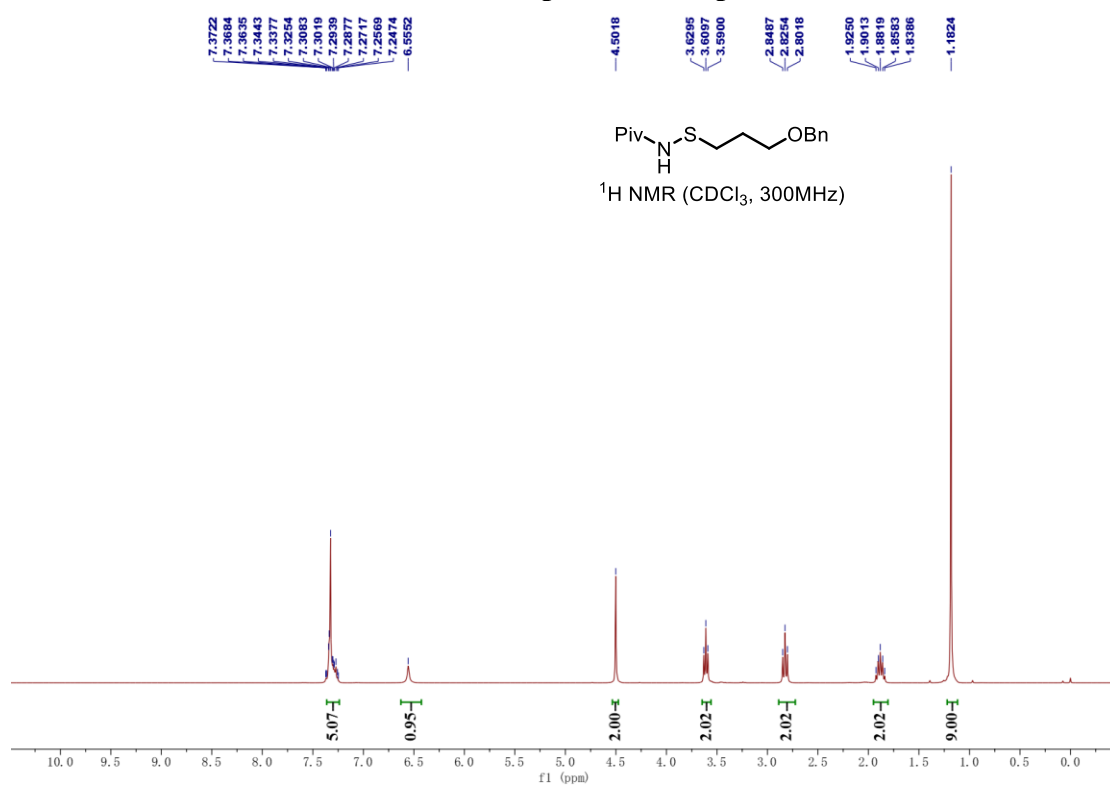

### <sup>13</sup>C NMR Spectrum of 3p

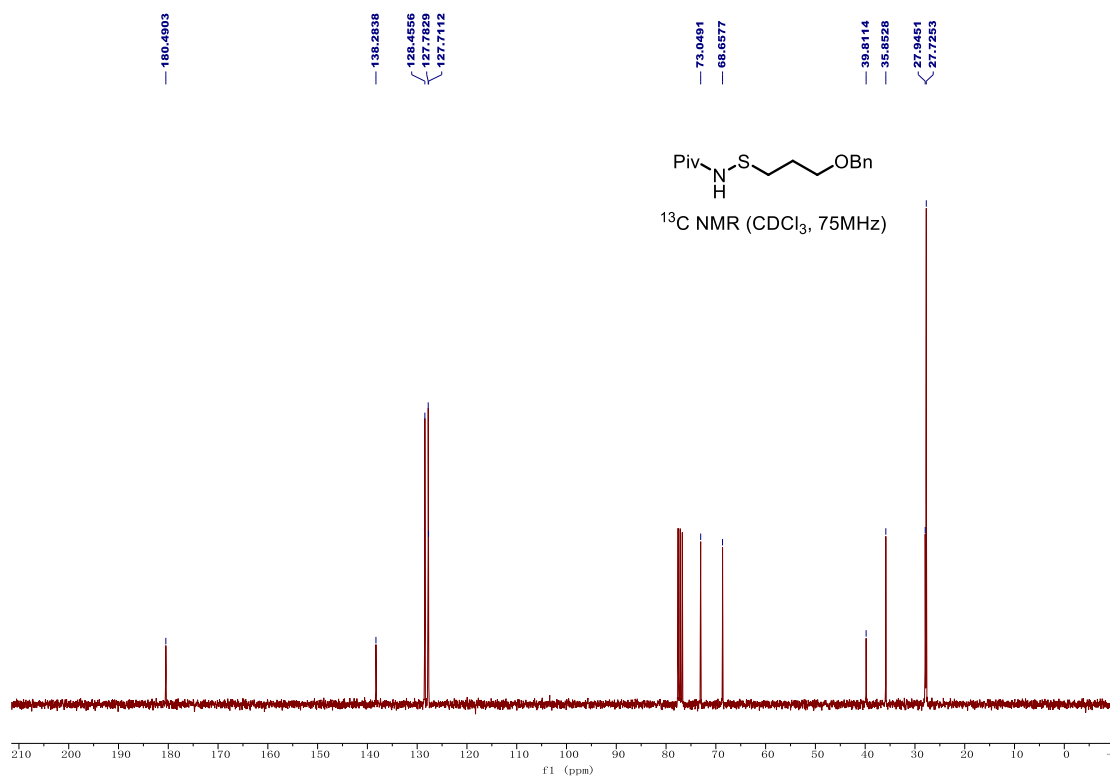

### <sup>1</sup>H NMR Spectrum of 3w

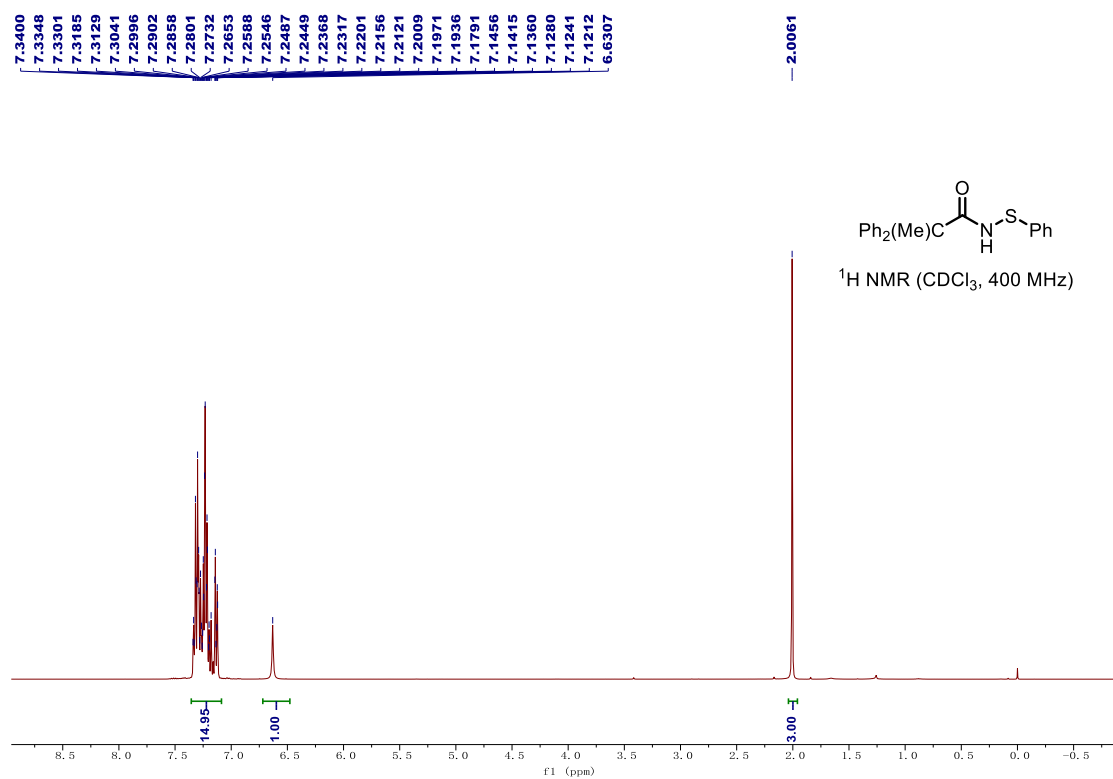

### <sup>13</sup>C NMR Spectrum of 3w

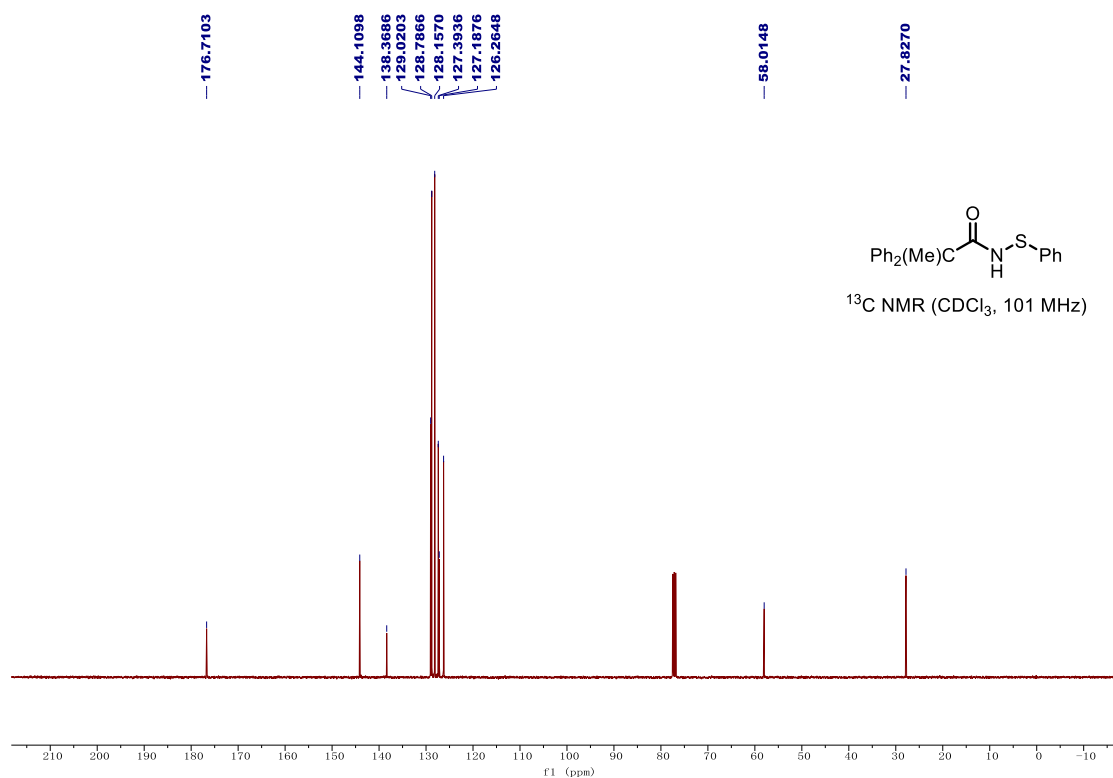

### <sup>1</sup>H NMR Spectrum of 3x

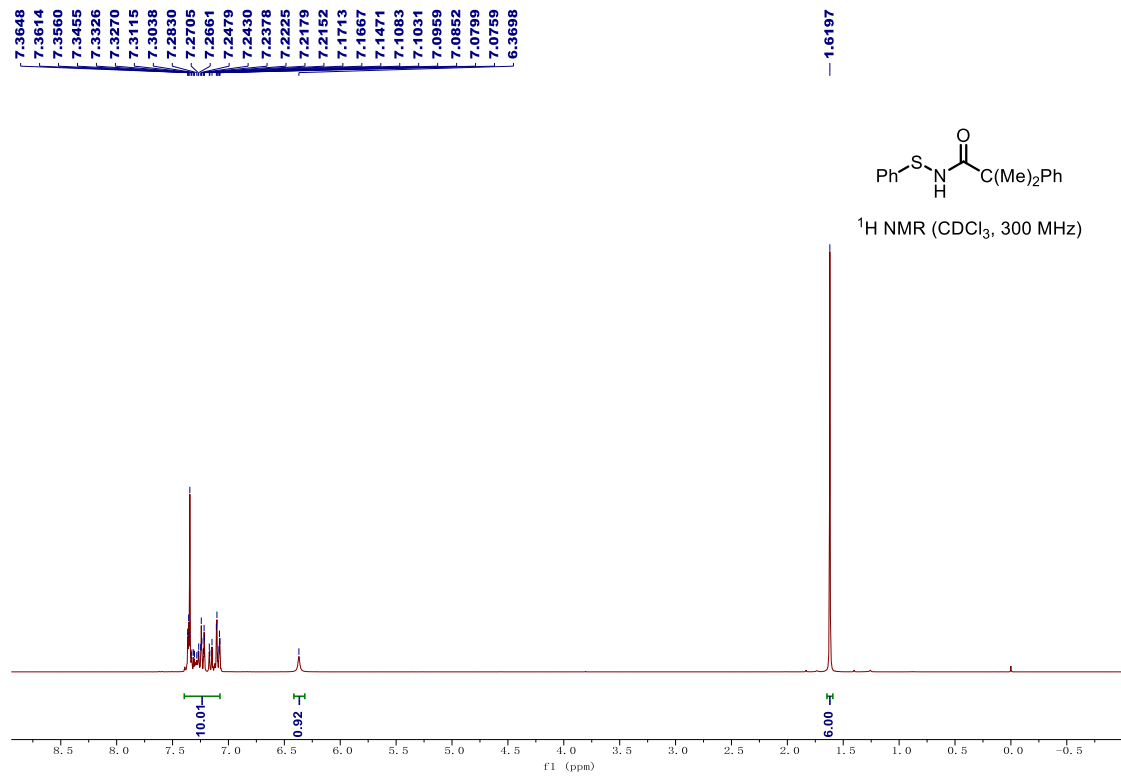

### <sup>13</sup>C NMR Spectrum of 3x

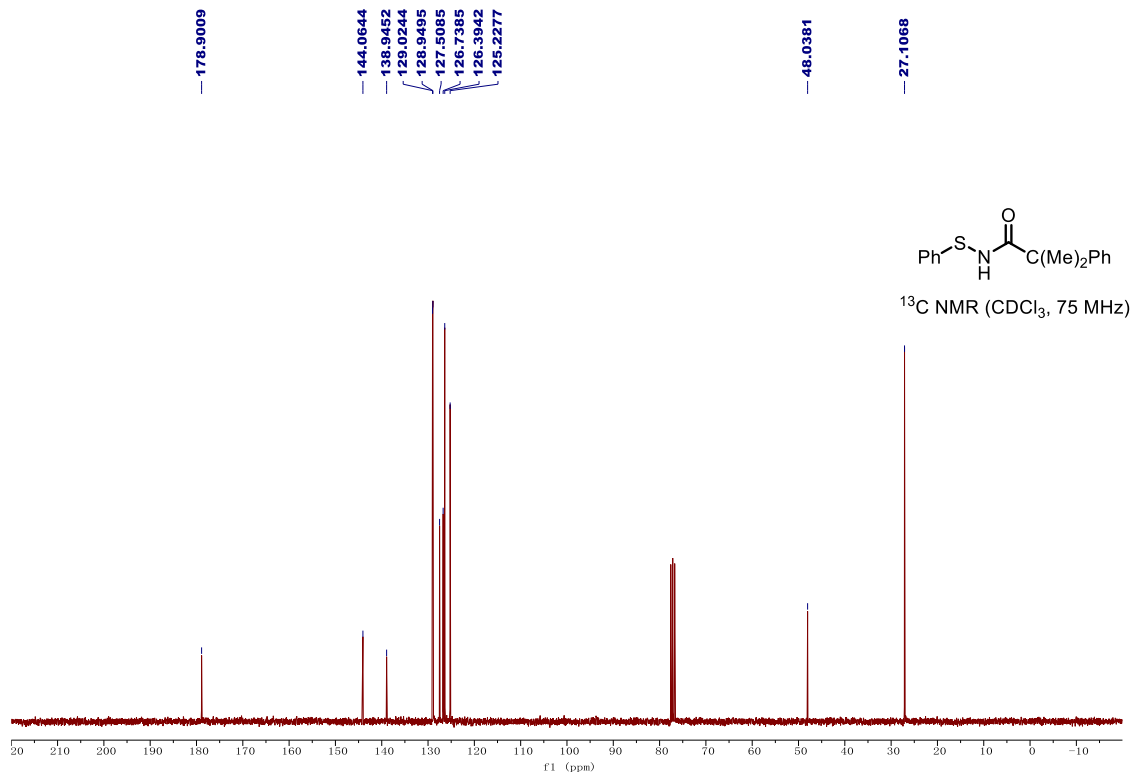

### <sup>1</sup>H NMR Spectrum of 4a

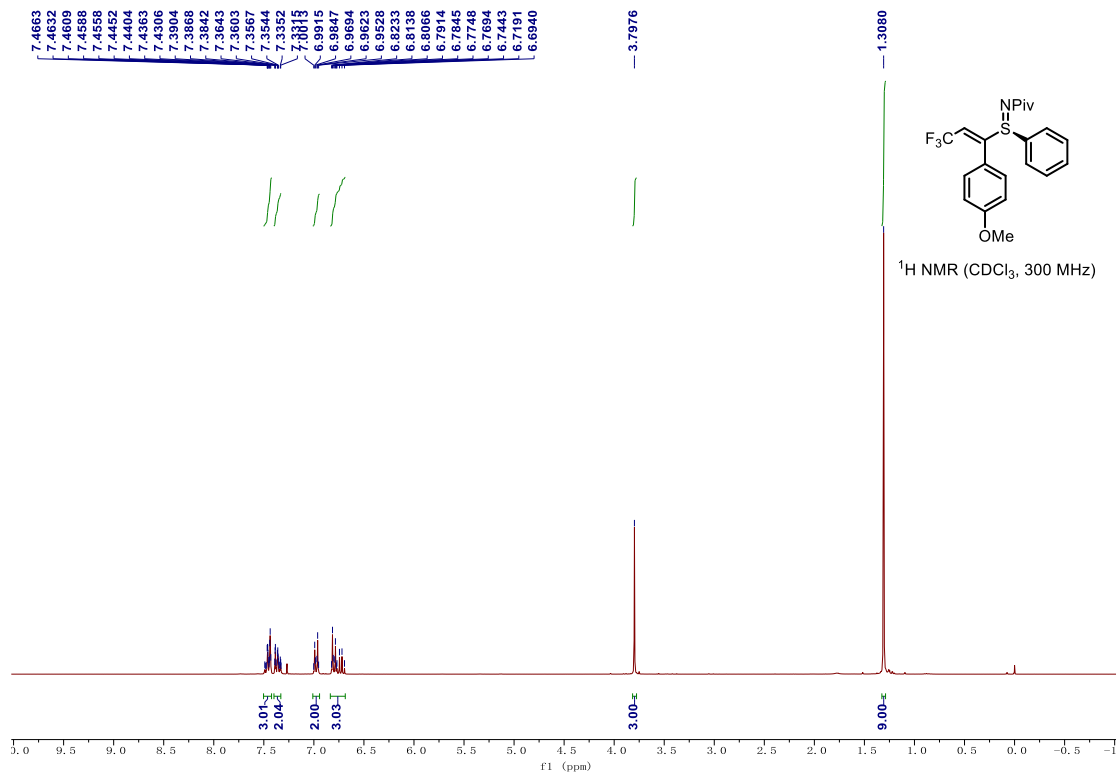

### <sup>13</sup>C NMR Spectrum of 4a

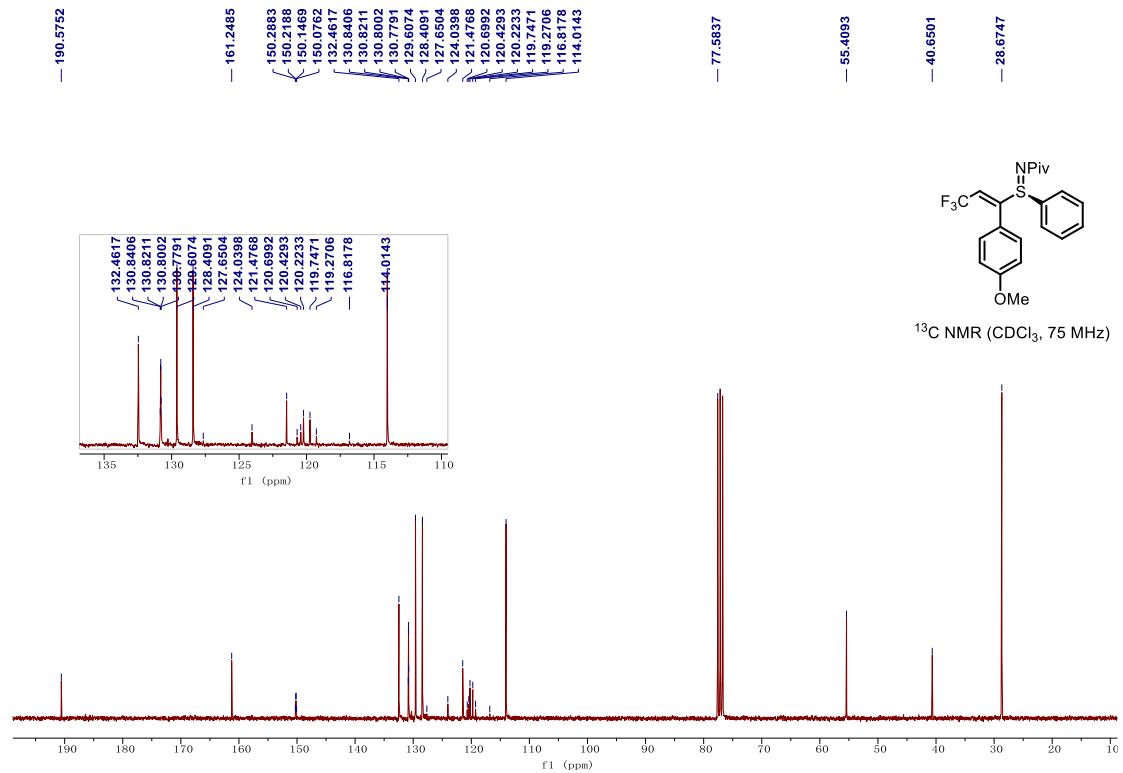

# <sup>19</sup>F NMR Spectrum of 4a

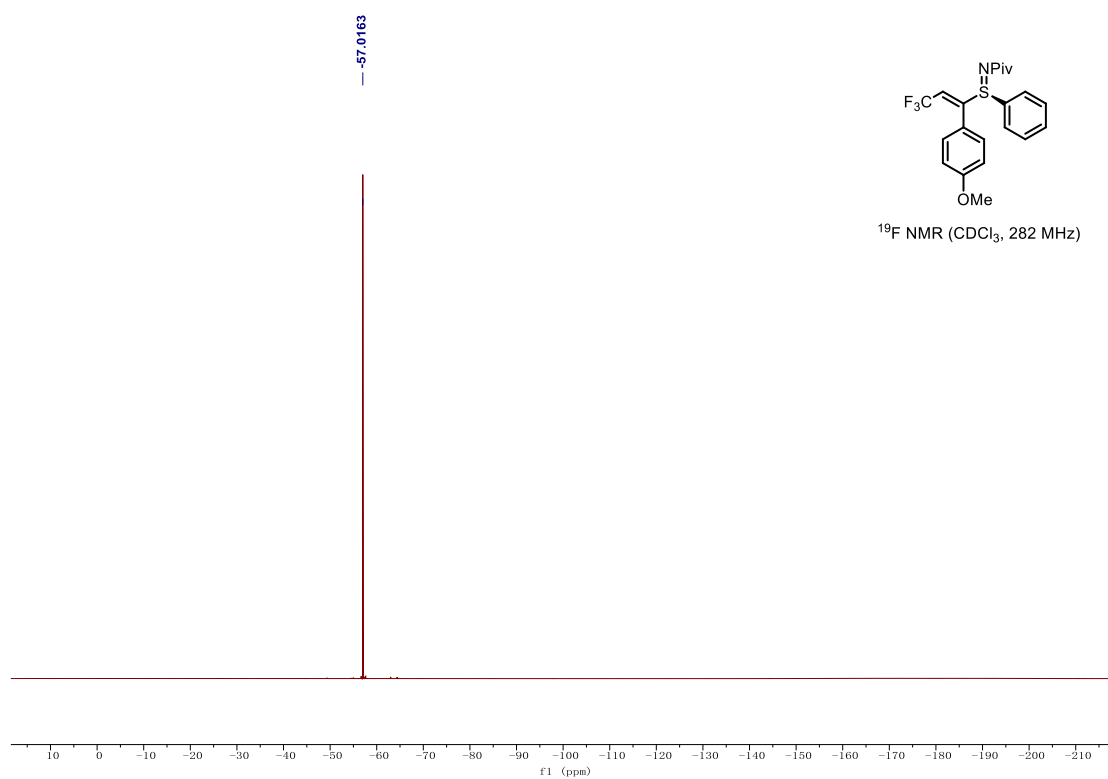

### <sup>1</sup>H NMR Spectrum of 4b

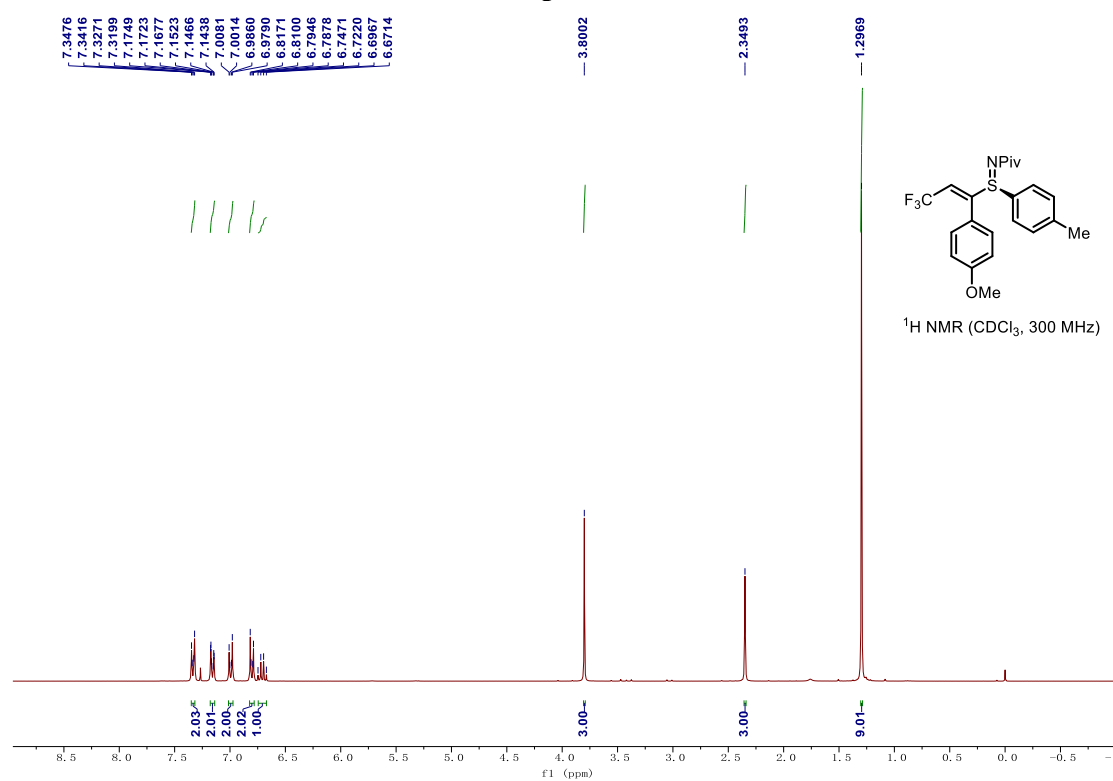

### <sup>13</sup>C NMR Spectrum of 4b

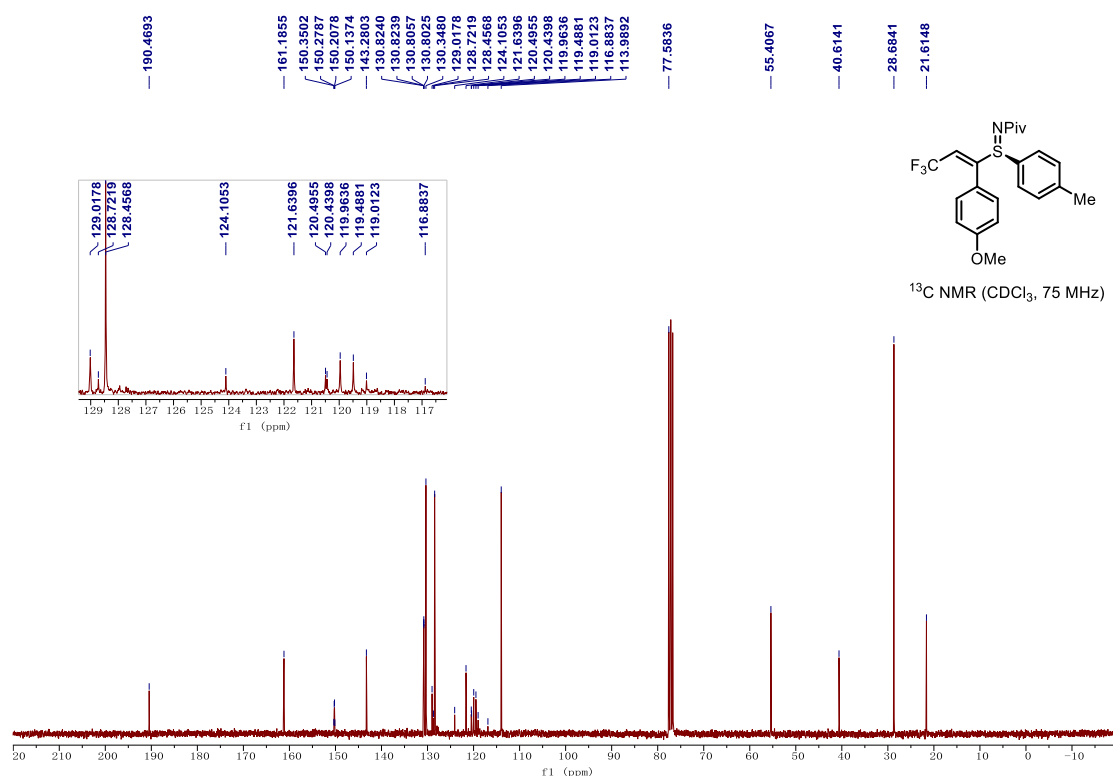

# <sup>19</sup>F NMR Spectrum of 4b

-56.9721

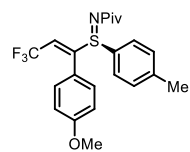

<sup>19</sup>F NMR (CDCl<sub>3</sub>, 282 MHz)

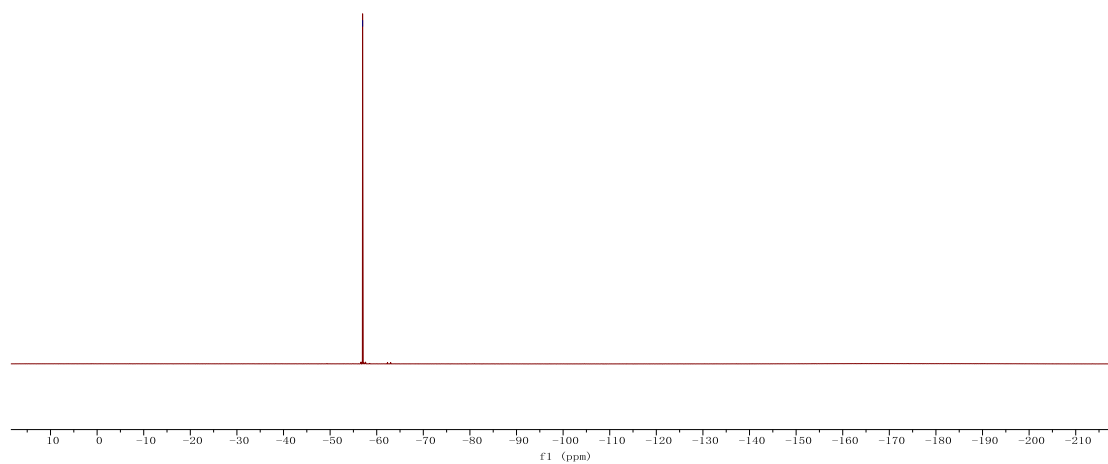

### <sup>1</sup>H NMR Spectrum of 4c

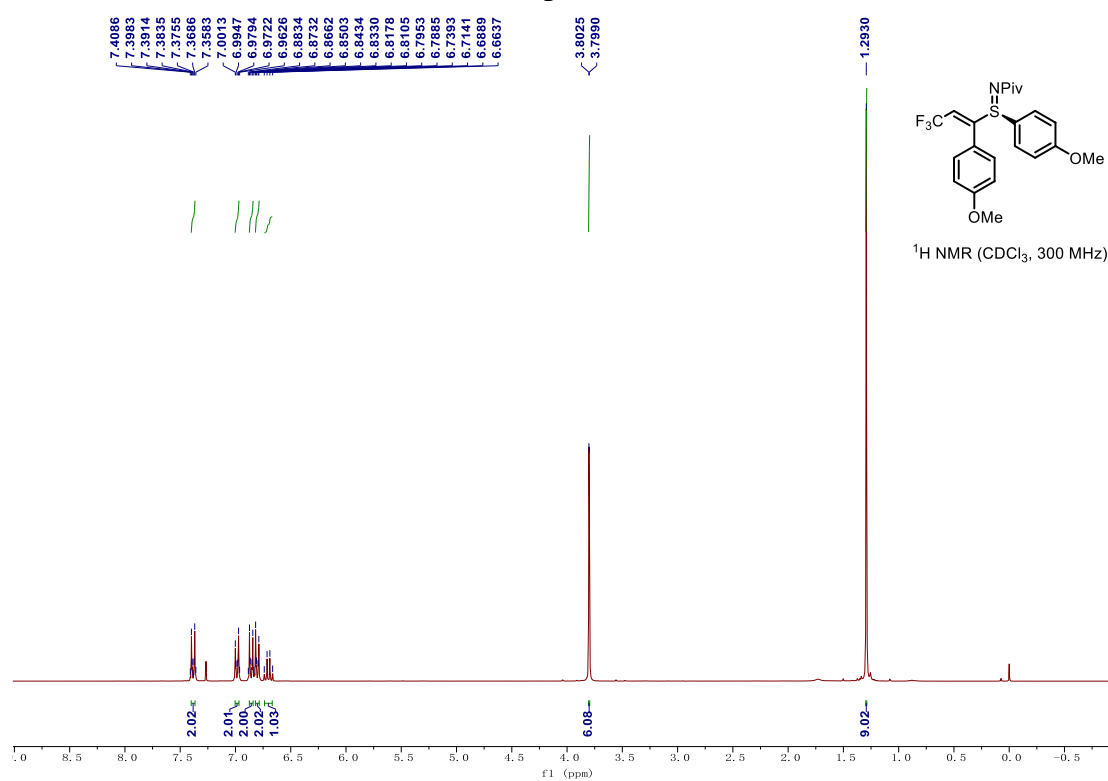

### <sup>13</sup>C NMR Spectrum of 4c

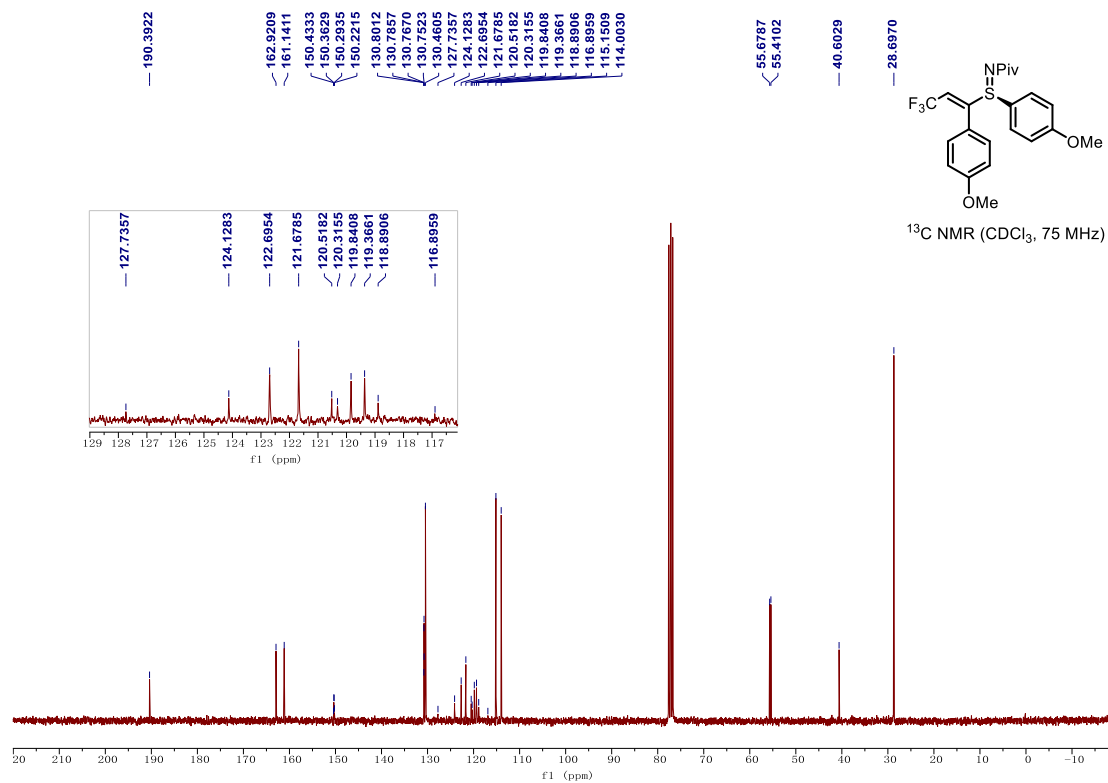

# <sup>19</sup>F NMR Spectrum of 4c

-56.9462

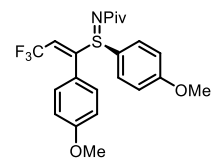

<sup>19</sup>F NMR (CDCl<sub>3</sub>, 282 MHz)

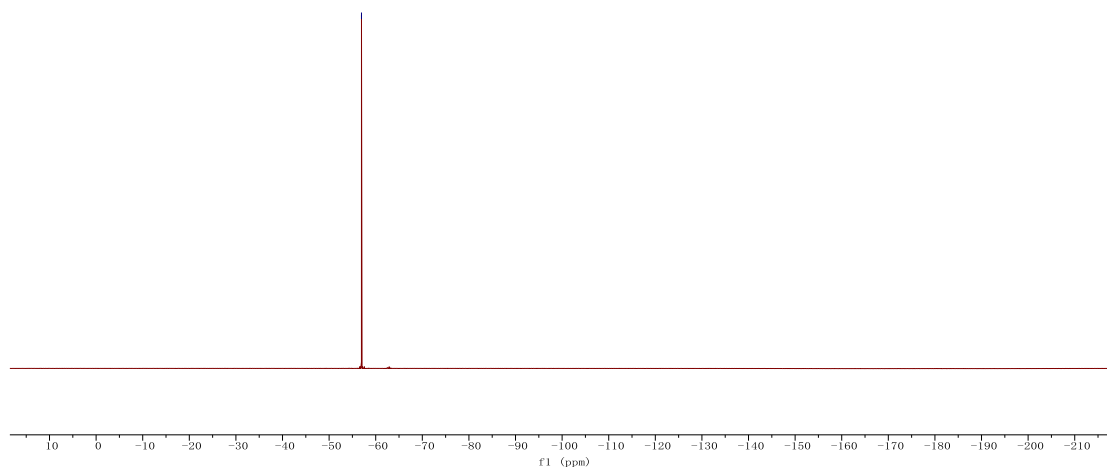

### <sup>1</sup>H NMR Spectrum of 4d

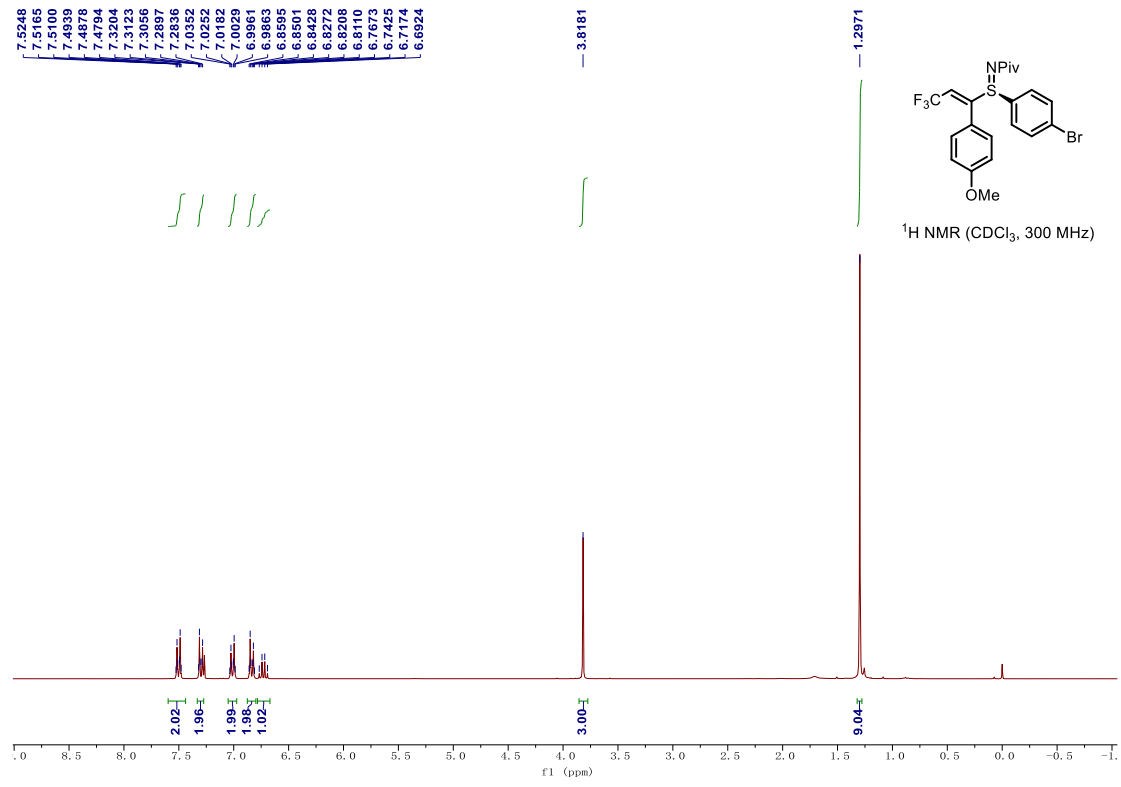

### <sup>13</sup>C NMR Spectrum of 4d

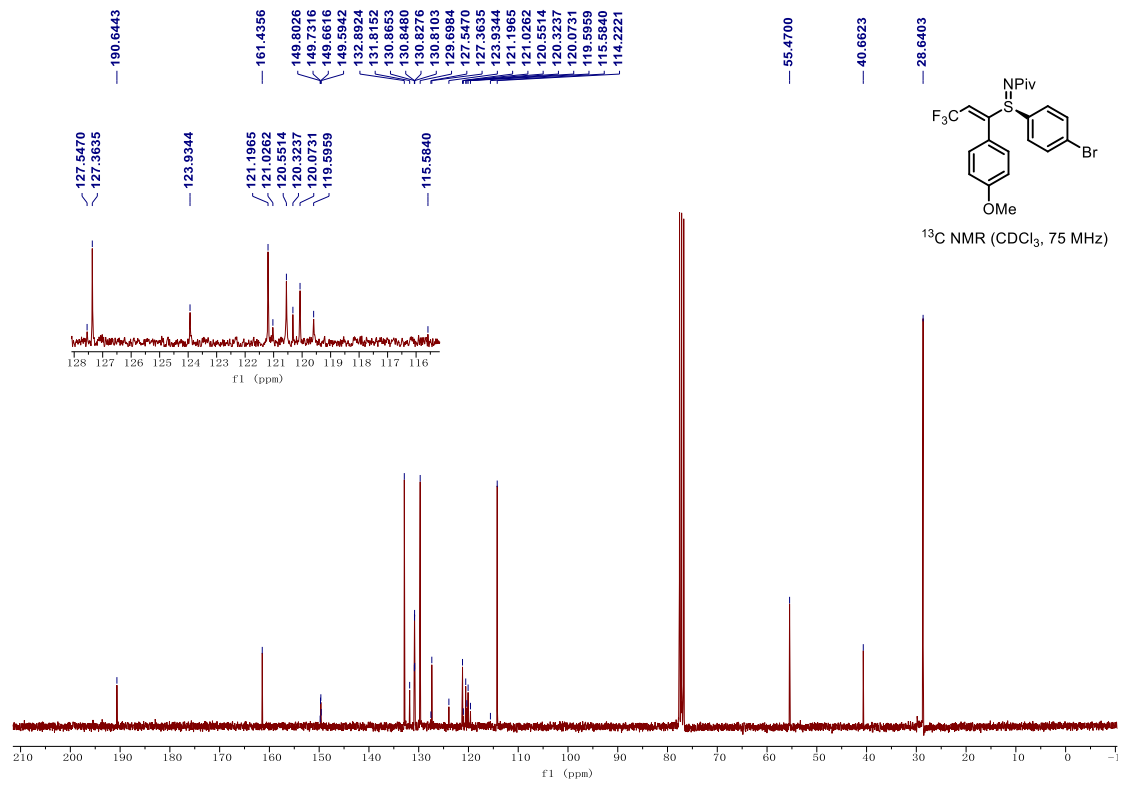

# <sup>19</sup>F NMR Spectrum of 4d

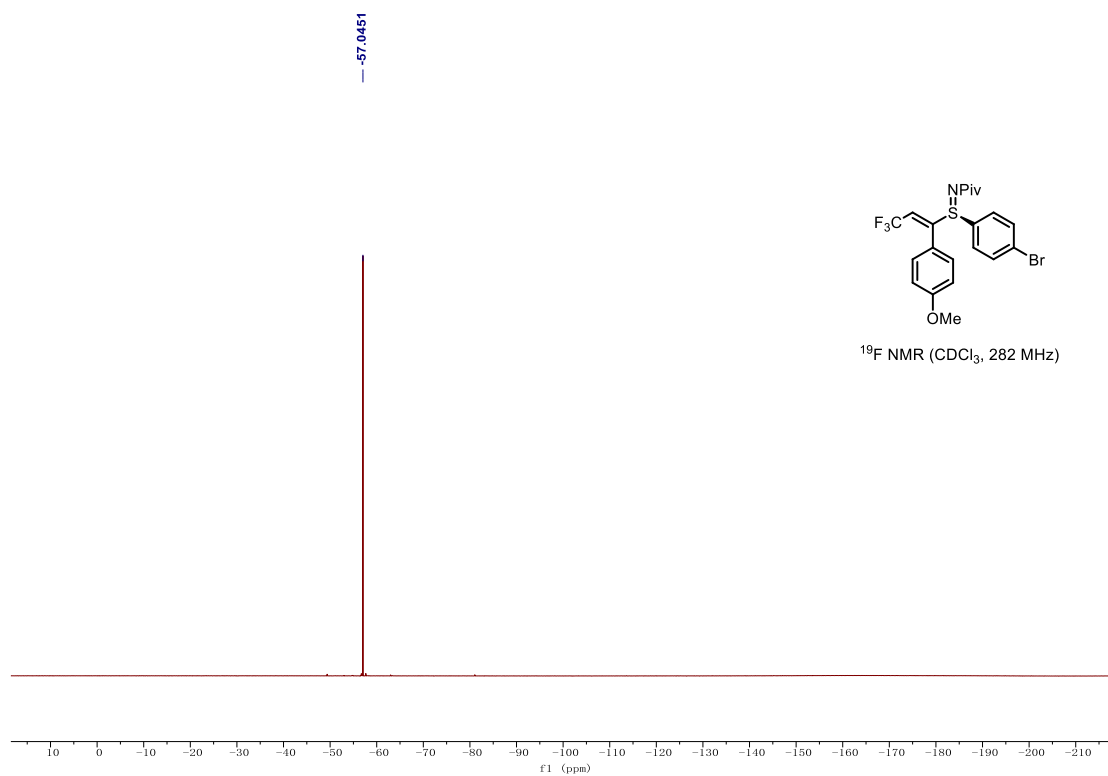

# <sup>1</sup>H NMR Spectrum of 4e

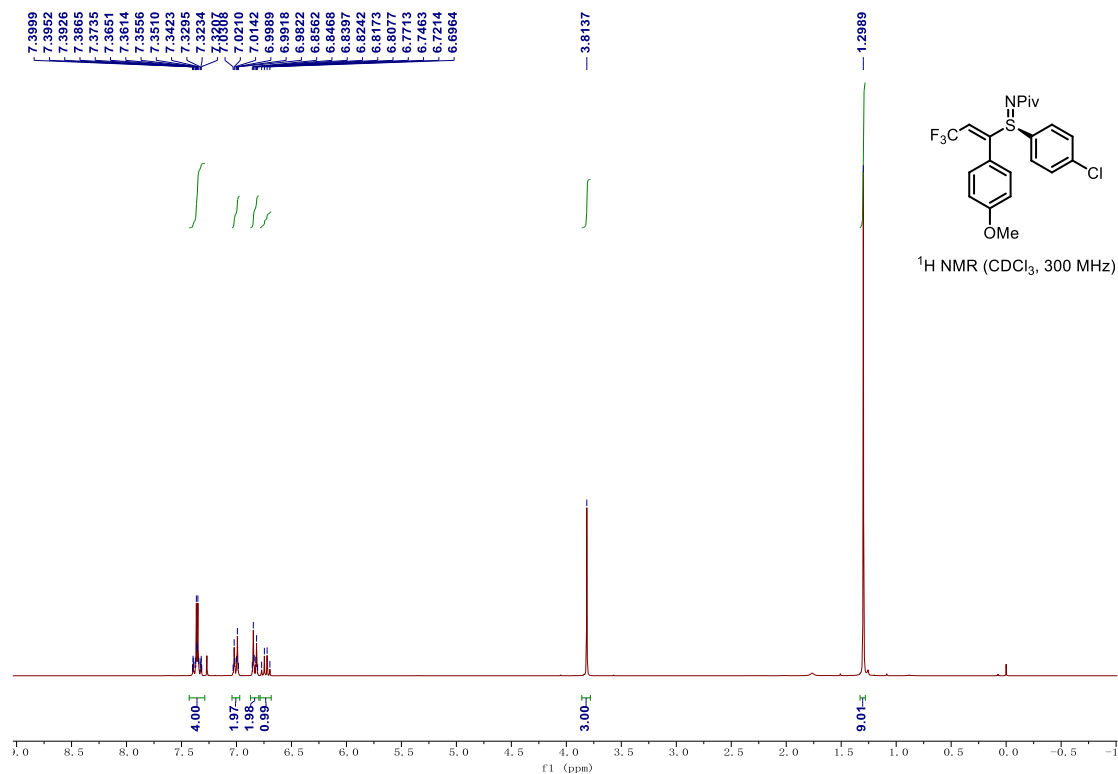

# <sup>13</sup>C NMR Spectrum of 4e

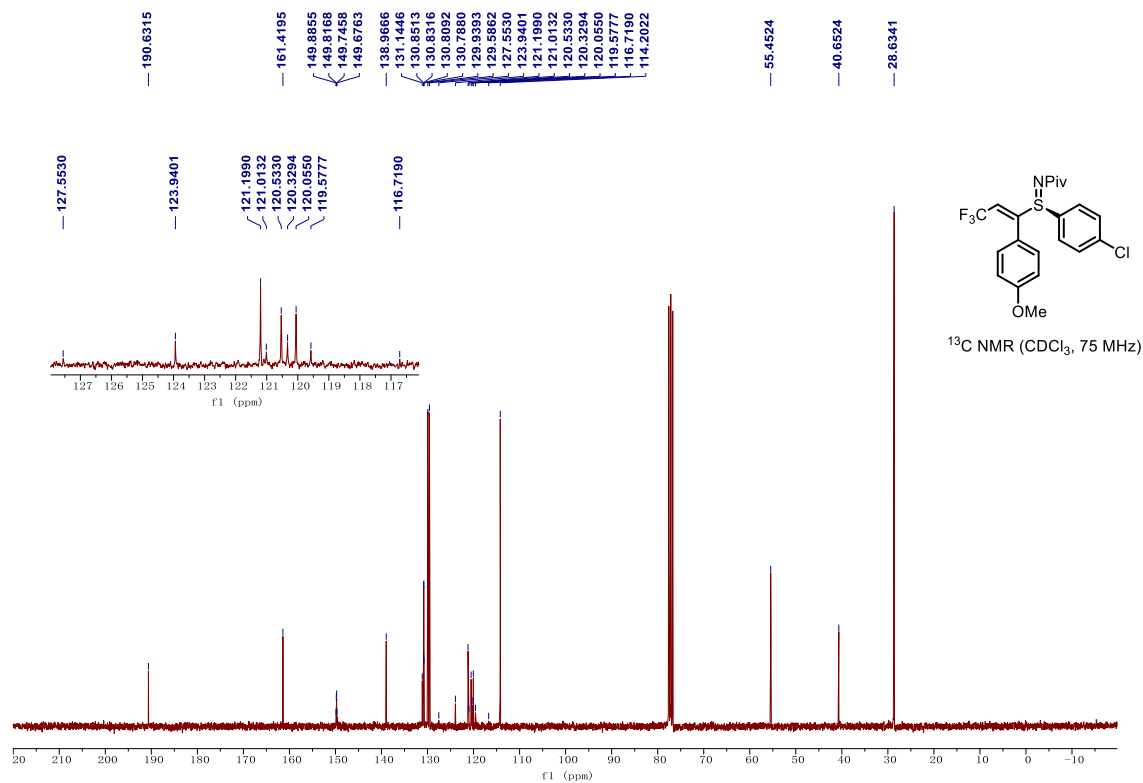

# <sup>19</sup>F NMR Spectrum of 4e

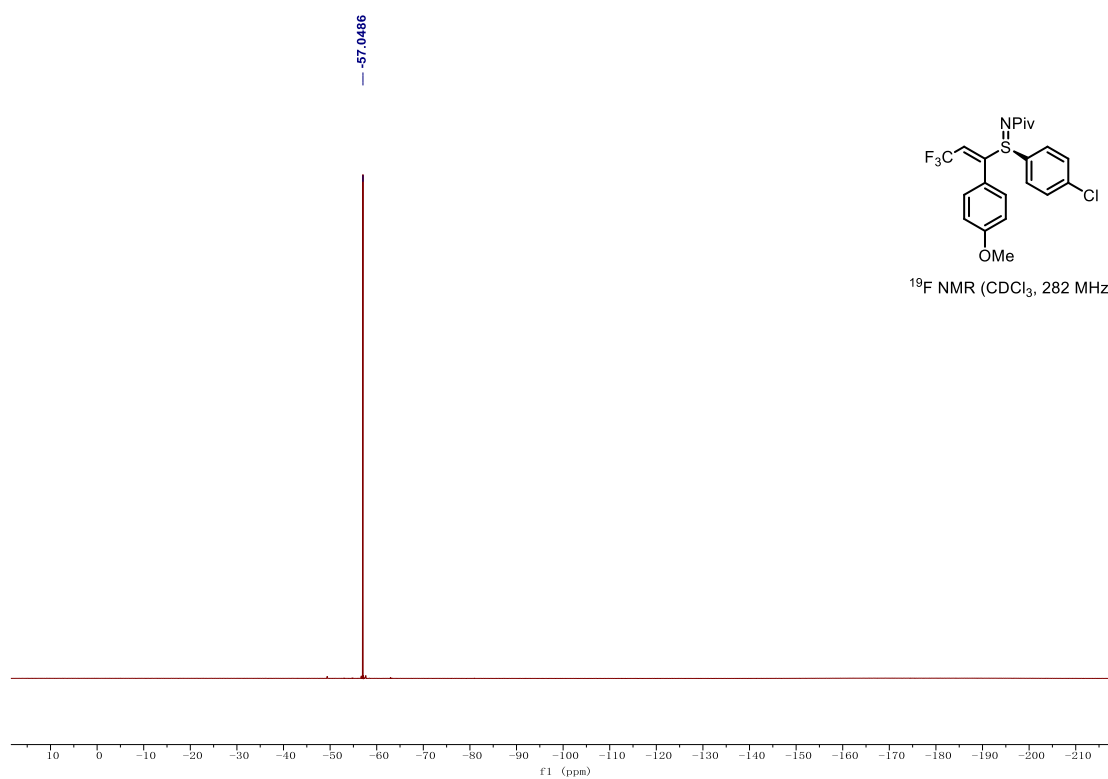

### <sup>1</sup>H NMR Spectrum of 4f

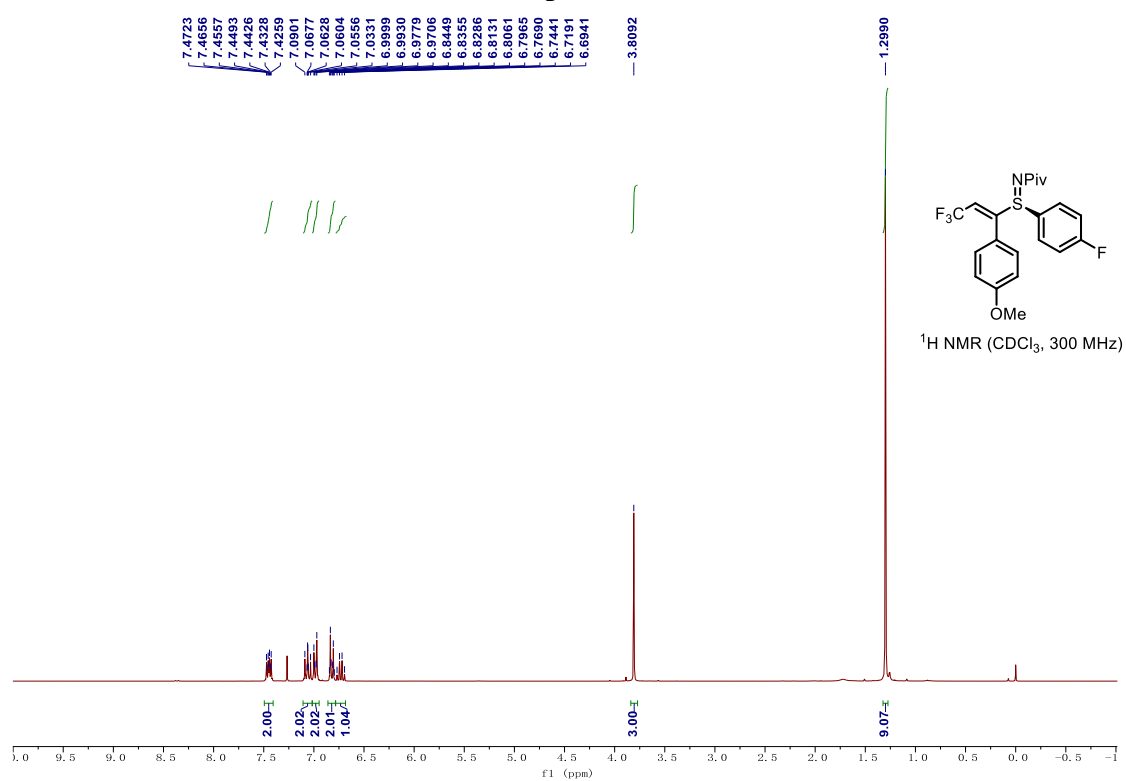

### <sup>13</sup>C NMR Spectrum of 4f

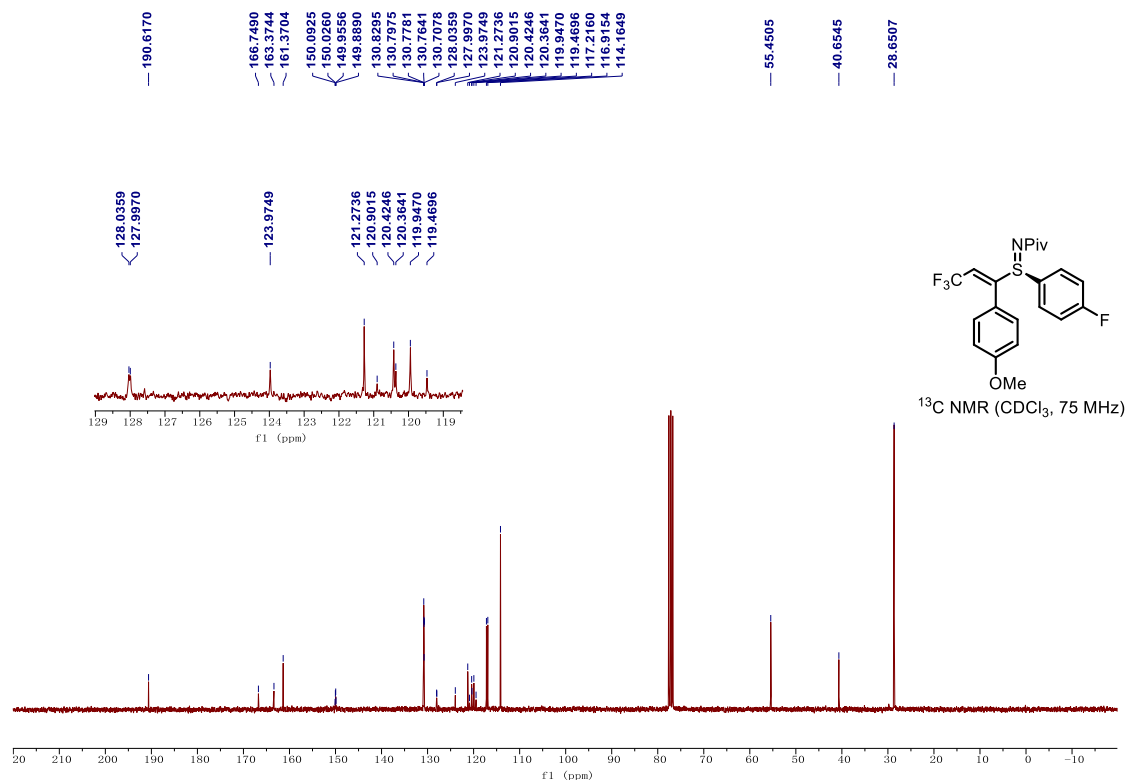

# <sup>19</sup>F NMR Spectrum of 4f

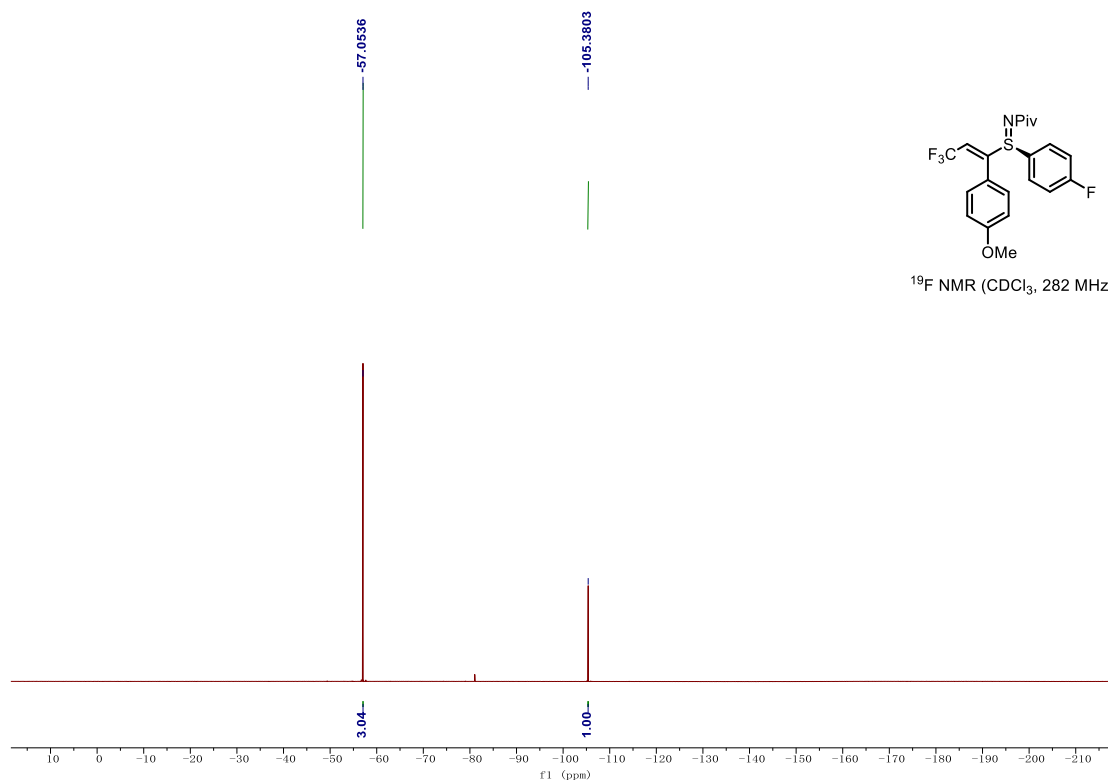

### <sup>1</sup>H NMR Spectrum of 4g

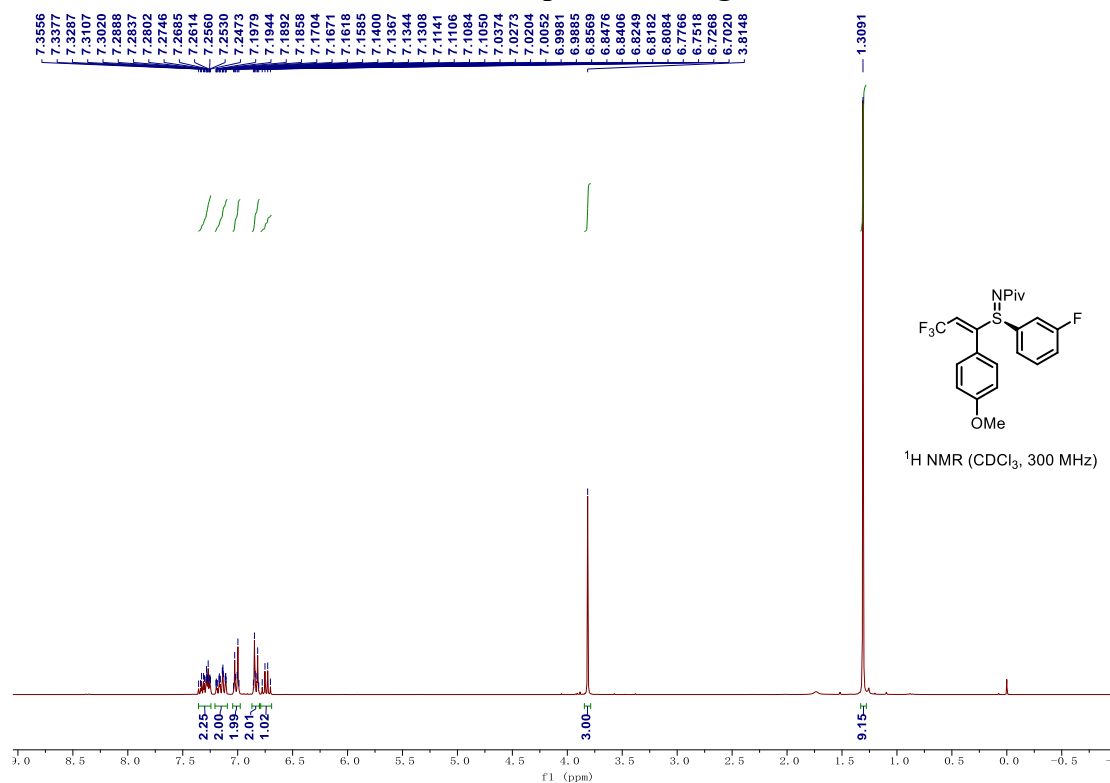

### <sup>13</sup>C NMR Spectrum of 4g

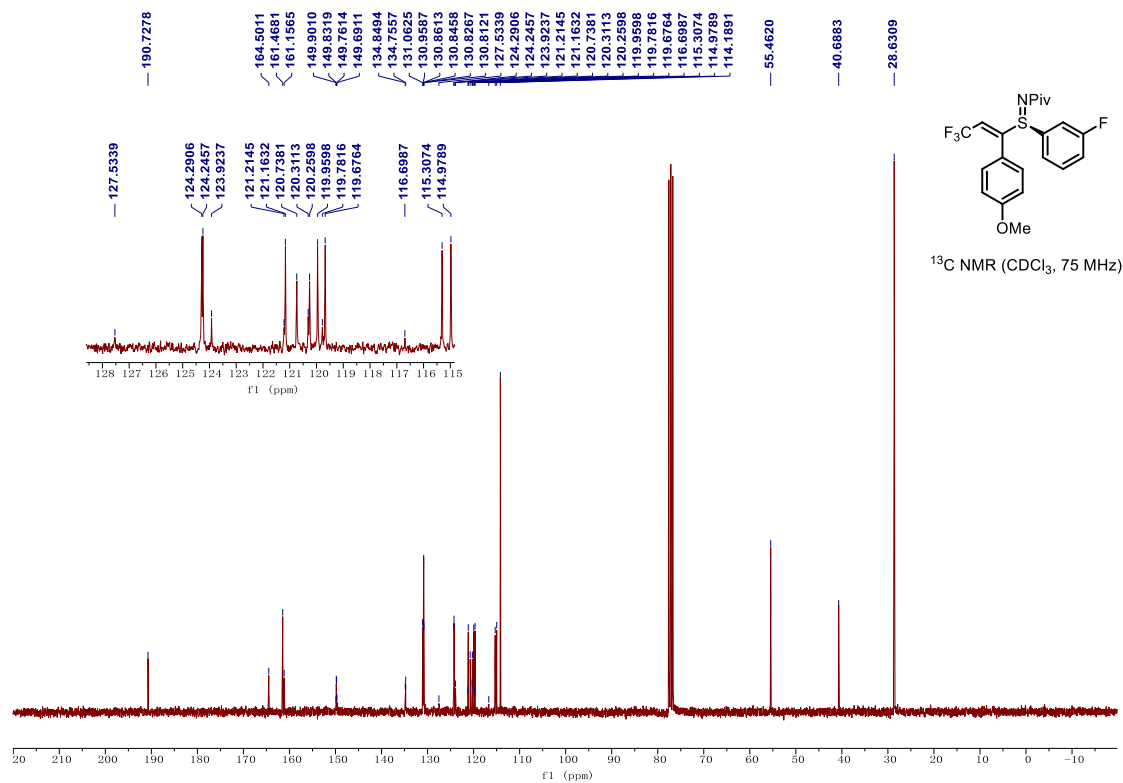

# <sup>19</sup>F NMR Spectrum of 4g

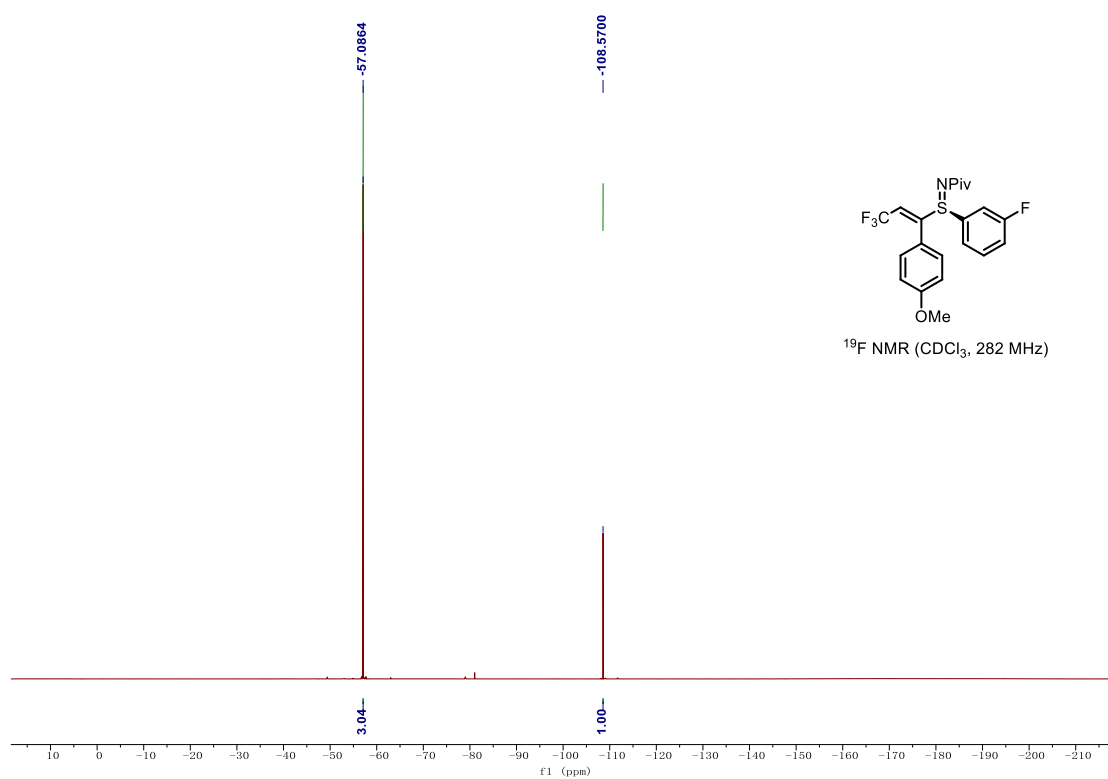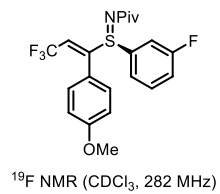

### <sup>1</sup>H NMR Spectrum of 4h

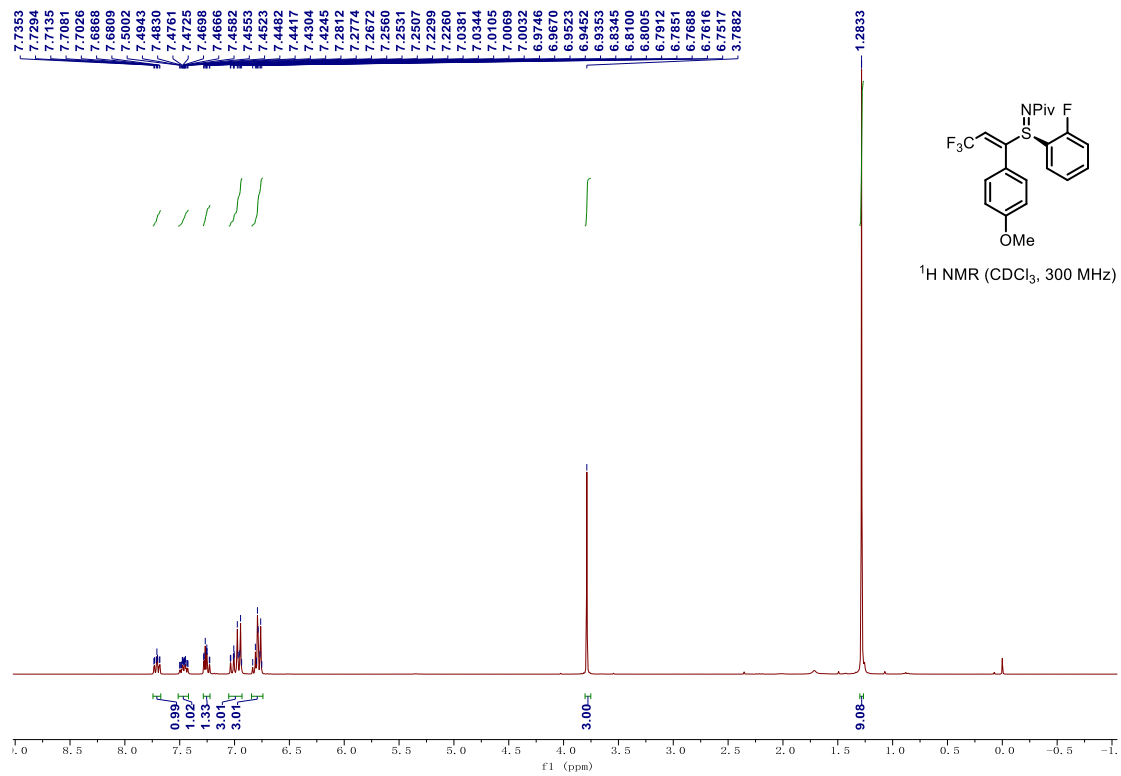

### <sup>13</sup>C NMR Spectrum of 4h

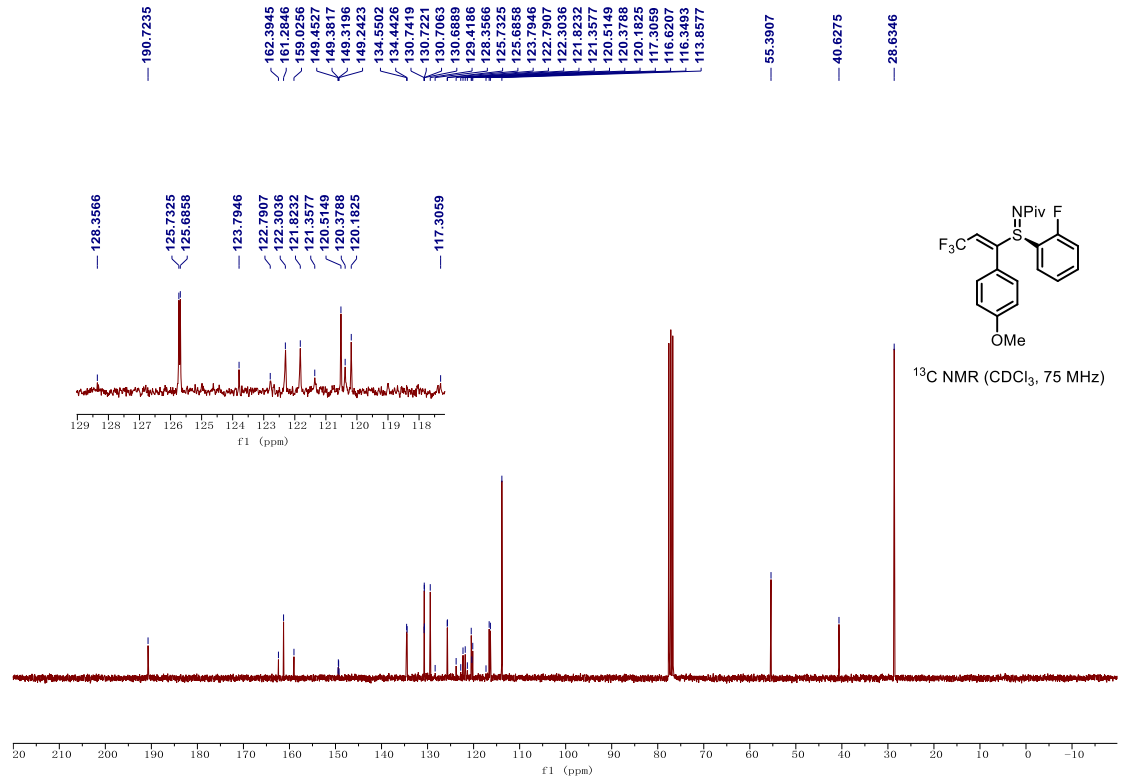

# <sup>19</sup>F NMR Spectrum of 4h

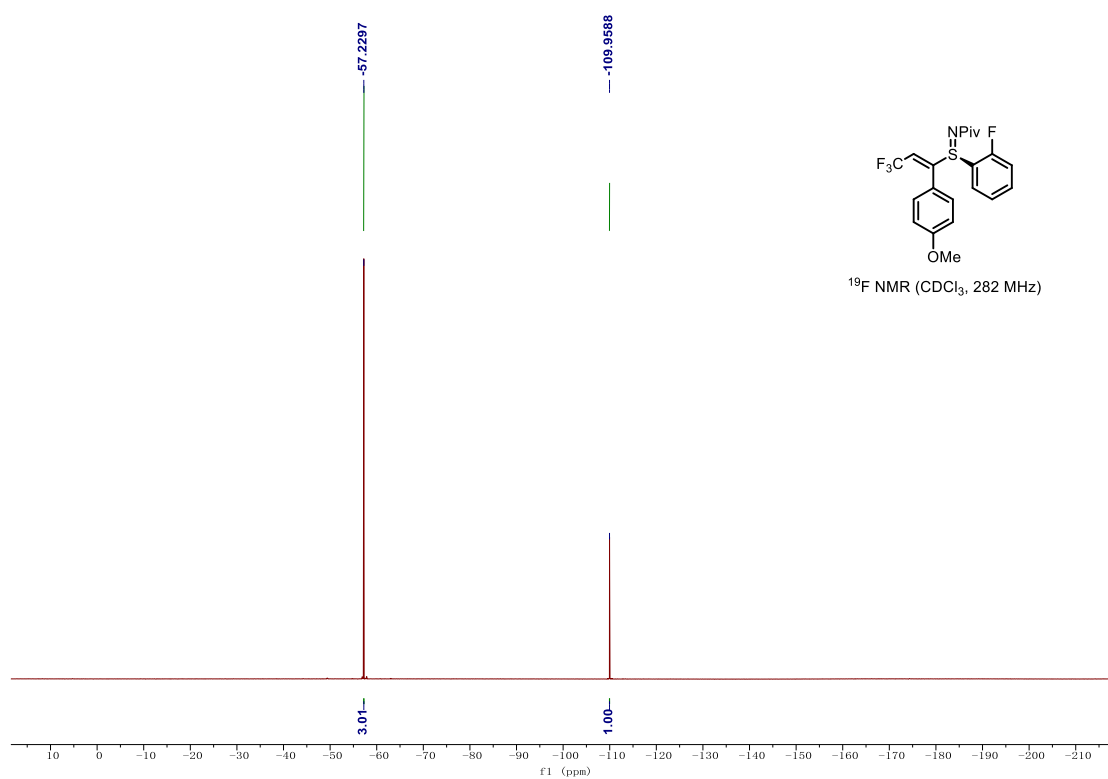

### <sup>1</sup>H NMR Spectrum of 4i

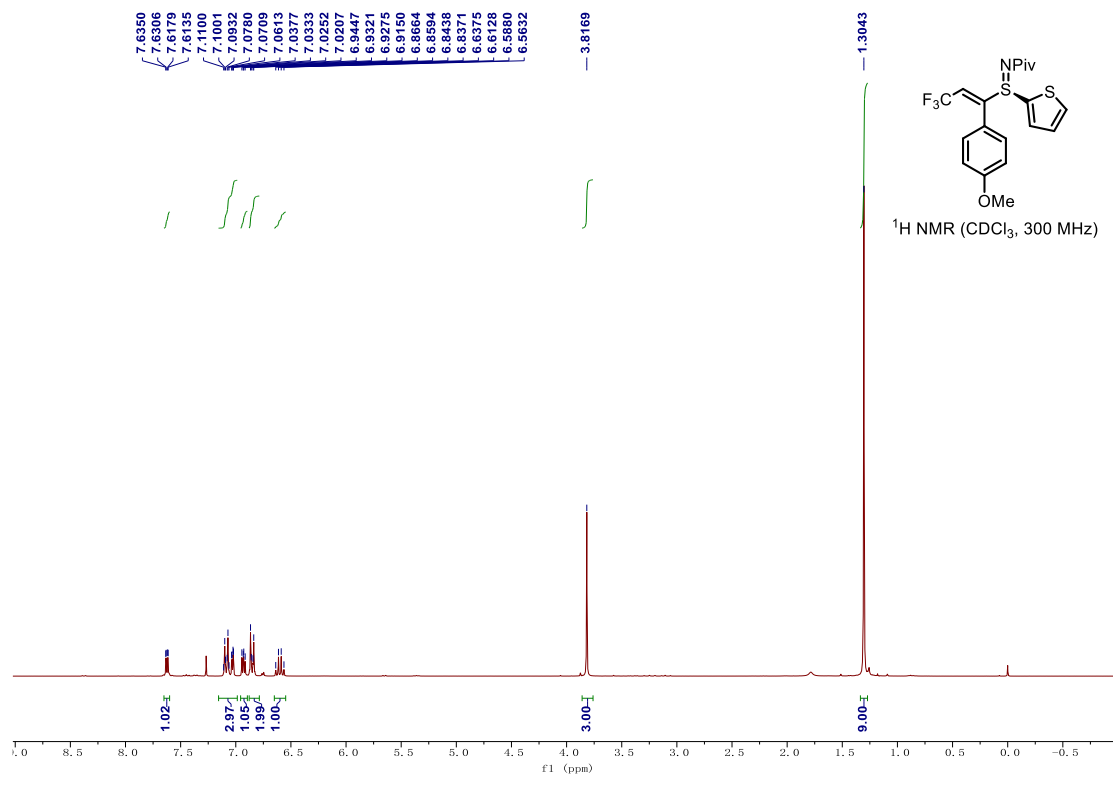

### <sup>13</sup>C NMR Spectrum of 4i

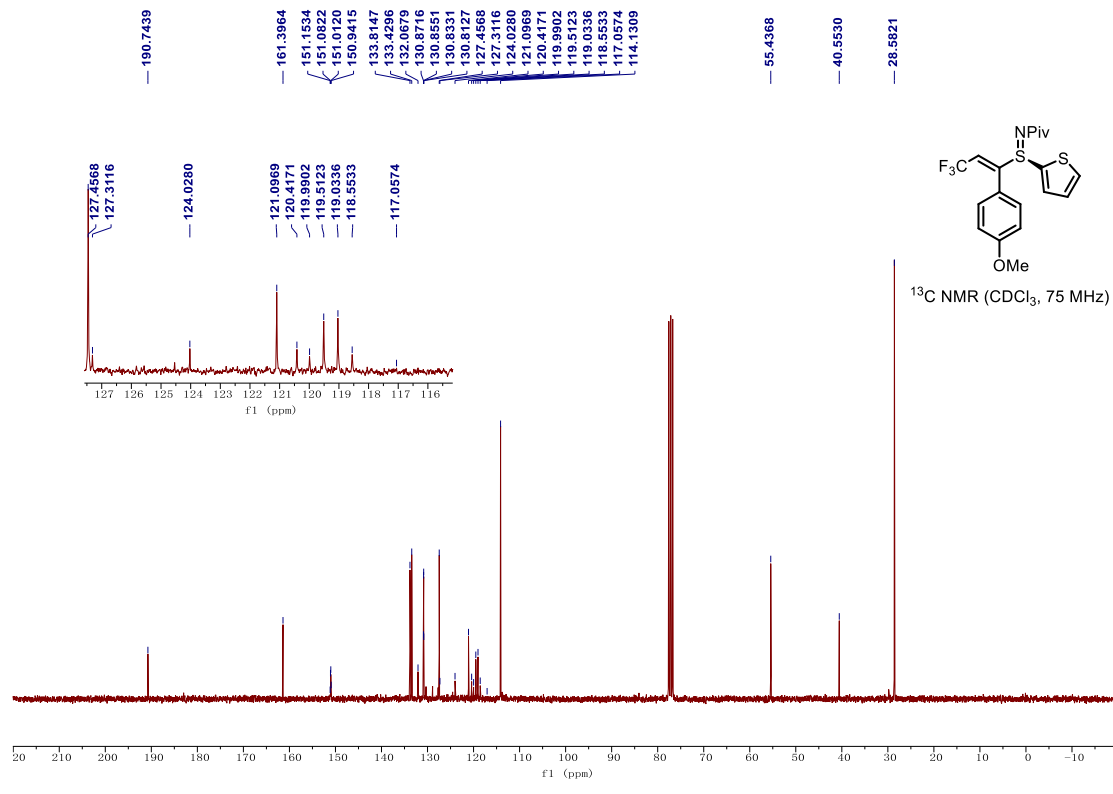

# <sup>19</sup>F NMR Spectrum of 4i

-57.1935

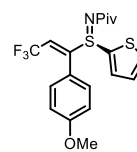

<sup>19</sup>F NMR (CDCl<sub>3</sub>, 282 MHz)

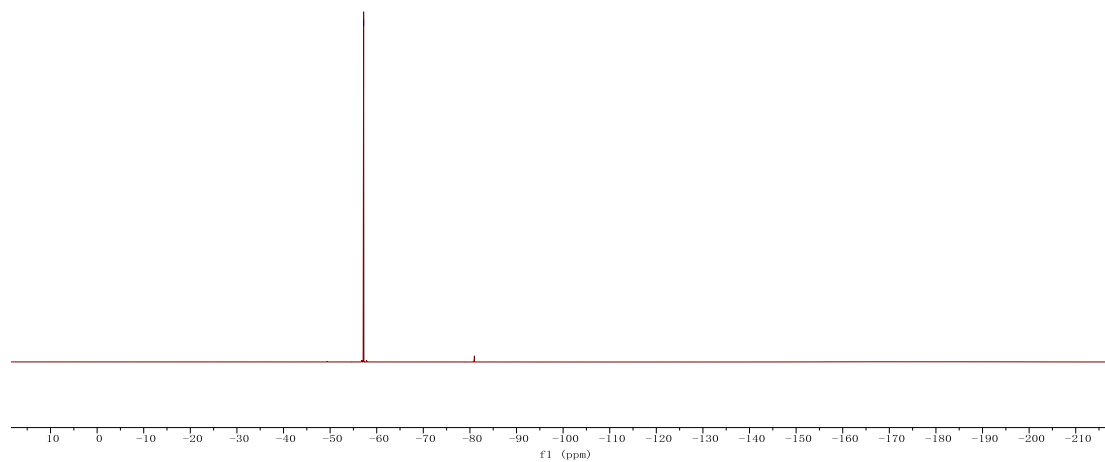



# <sup>19</sup>F NMR Spectrum of 4j

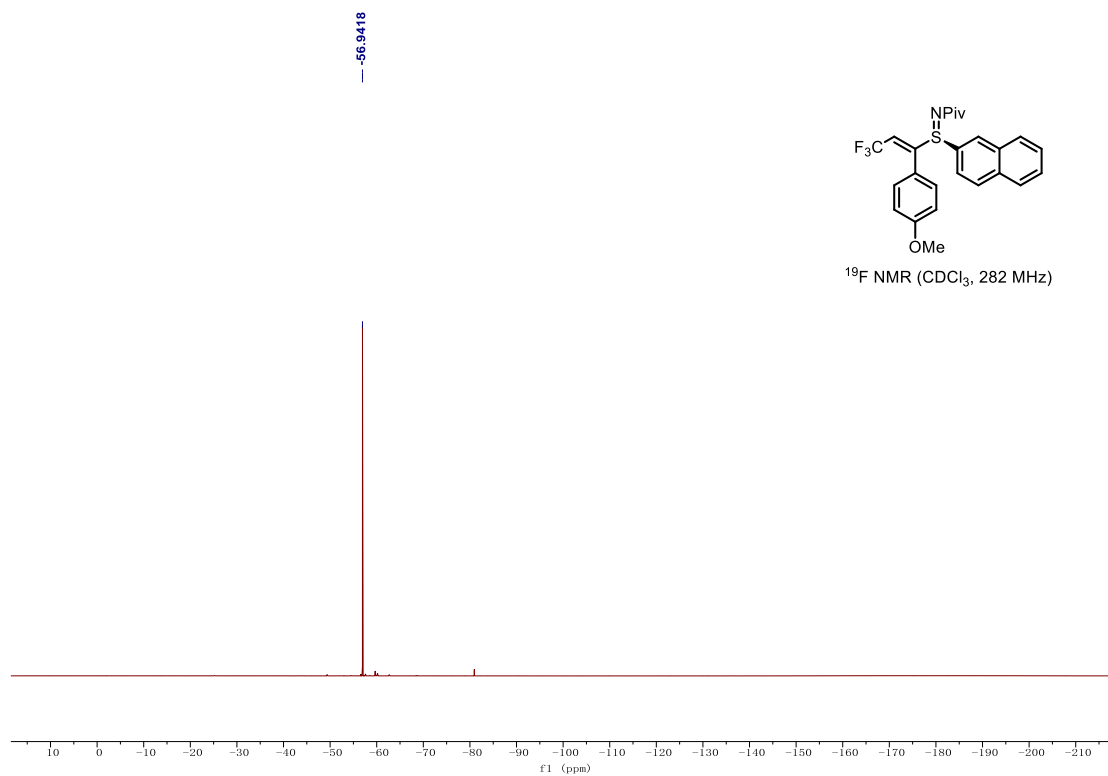

### <sup>1</sup>H NMR Spectrum of 4k

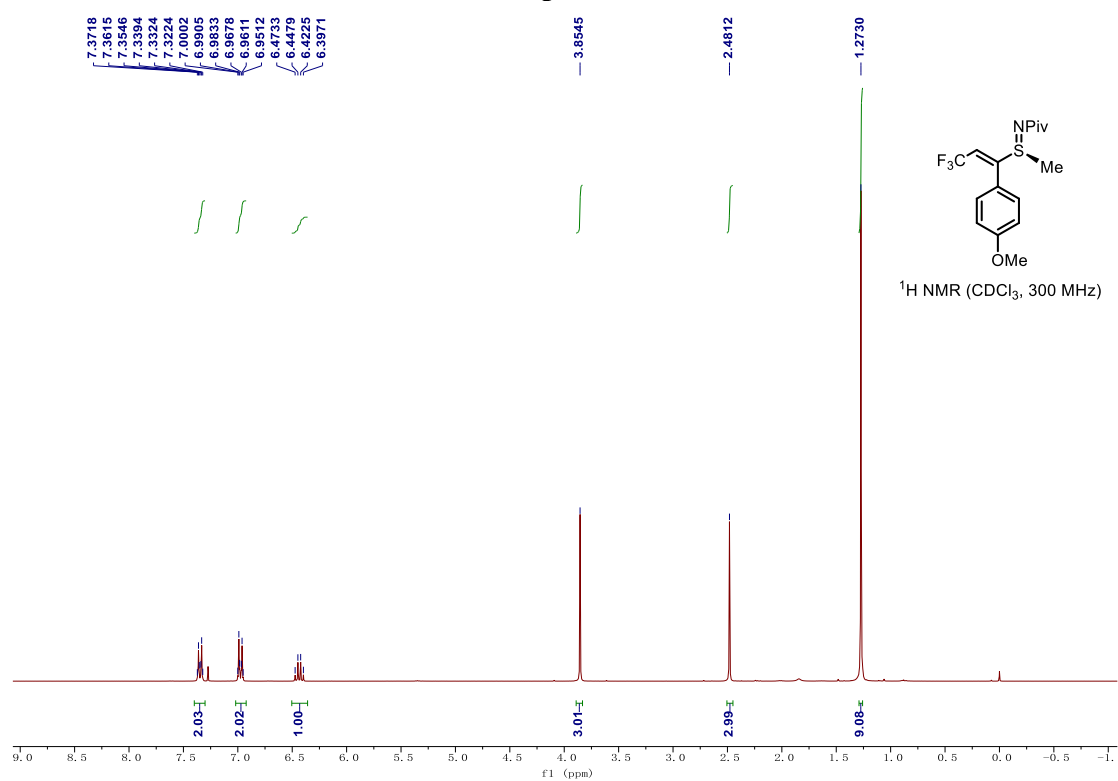

### <sup>13</sup>C NMR Spectrum of 4k

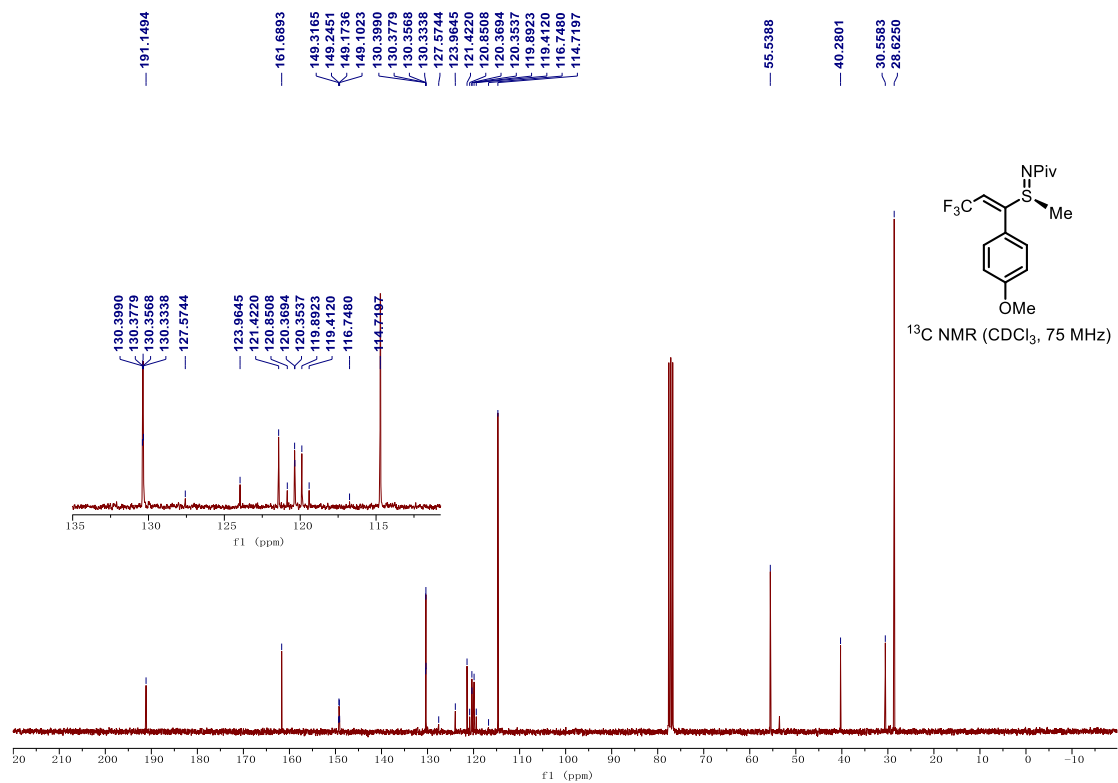

# <sup>19</sup>F NMR Spectrum of 4k

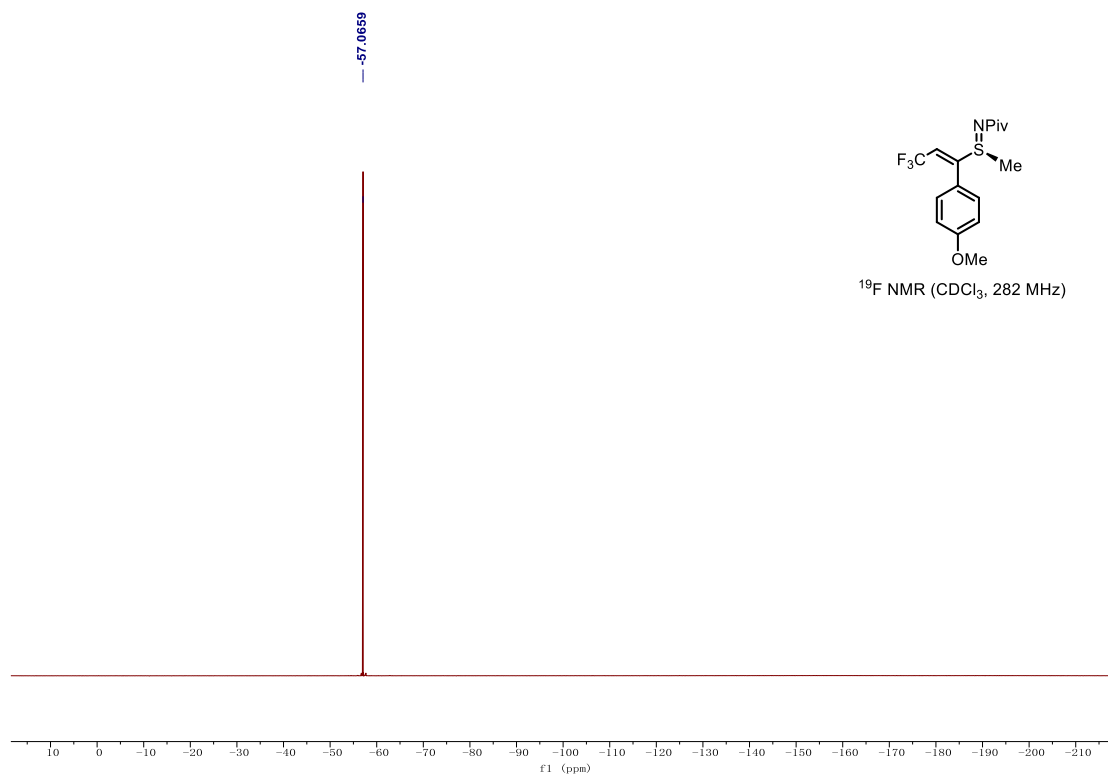

### <sup>1</sup>H NMR Spectrum of 4l

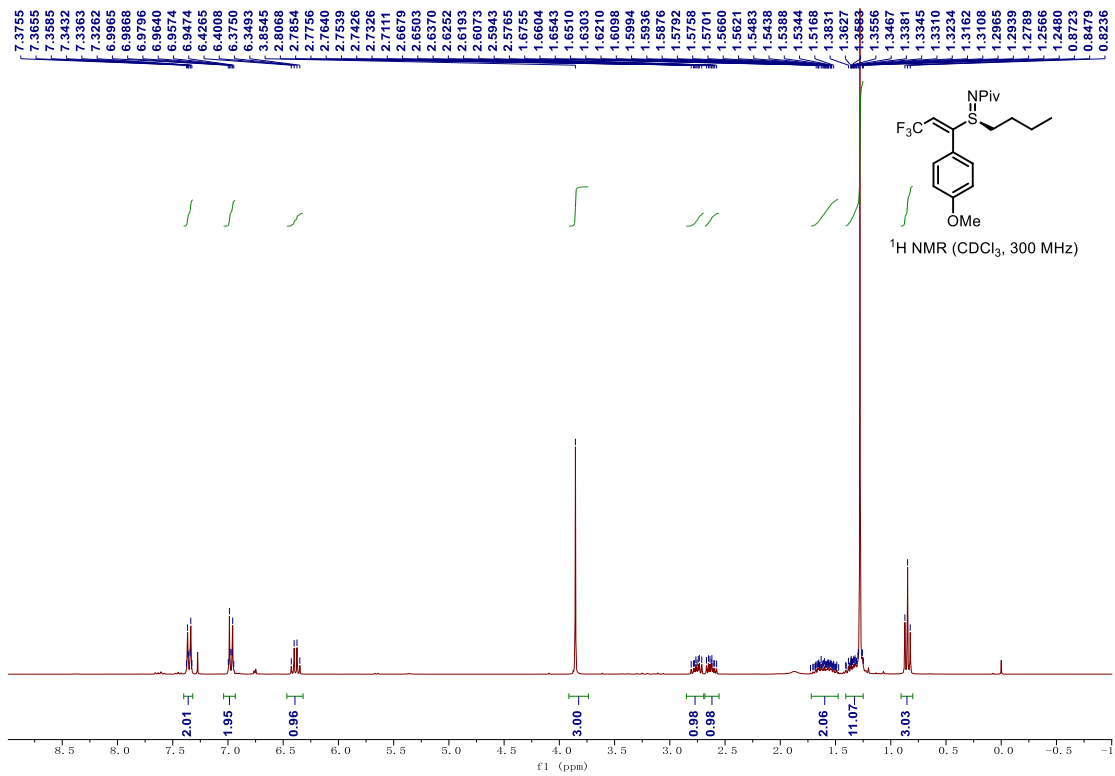

### <sup>13</sup>C NMR Spectrum of 4l

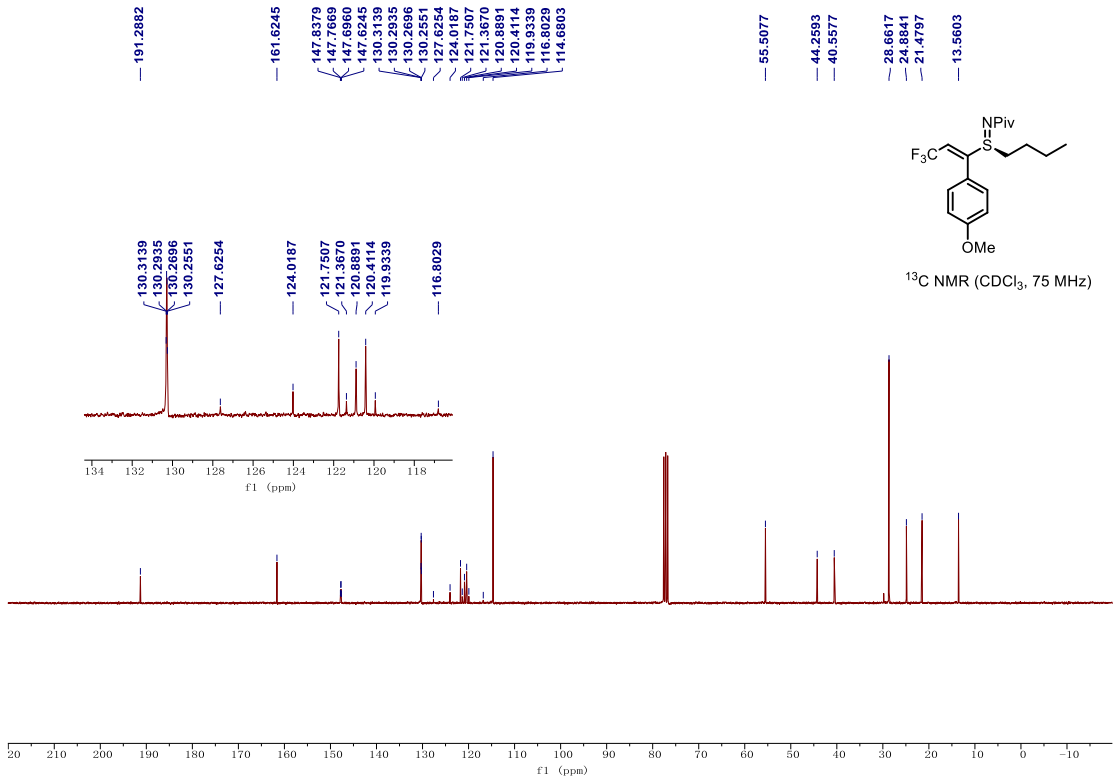

# <sup>19</sup>F NMR Spectrum of 4l

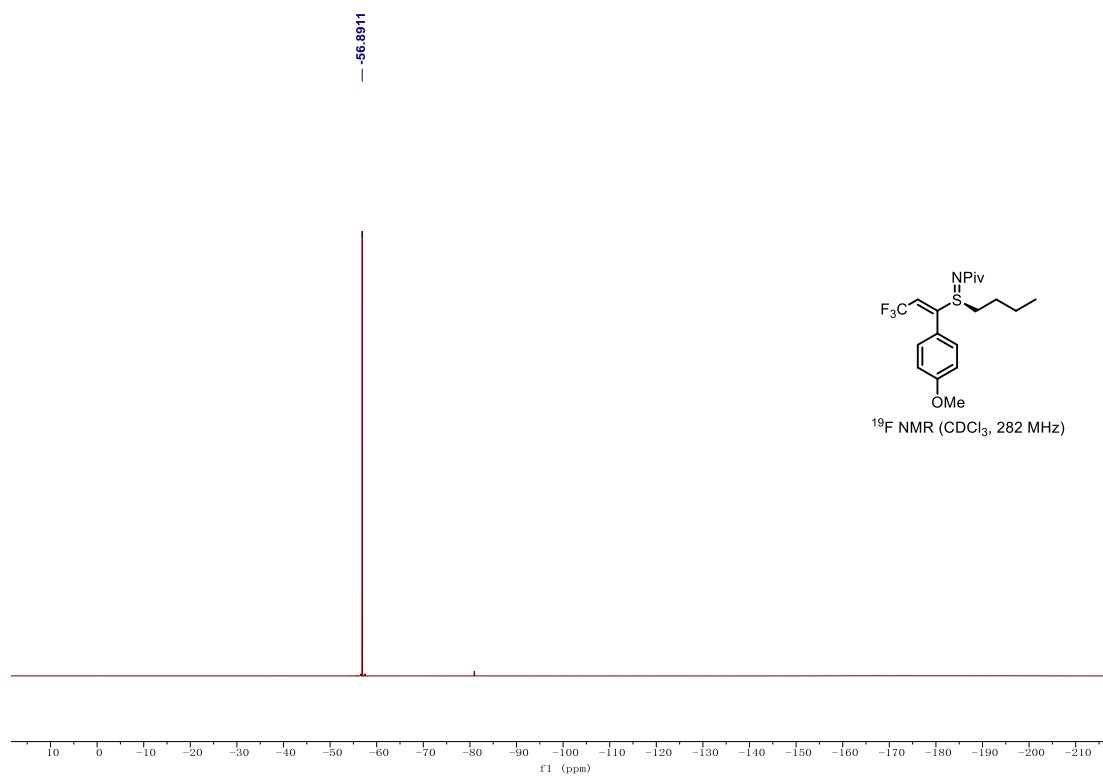

### <sup>1</sup>H NMR Spectrum of 4m

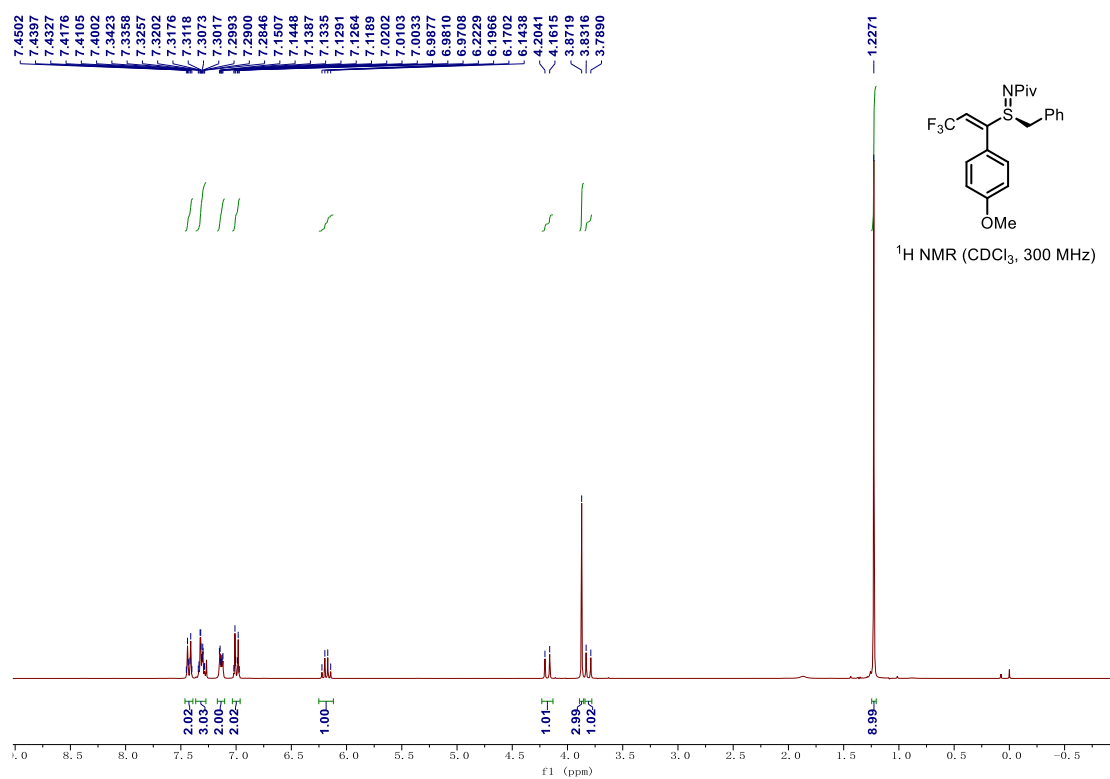

### <sup>13</sup>C NMR Spectrum of 4m

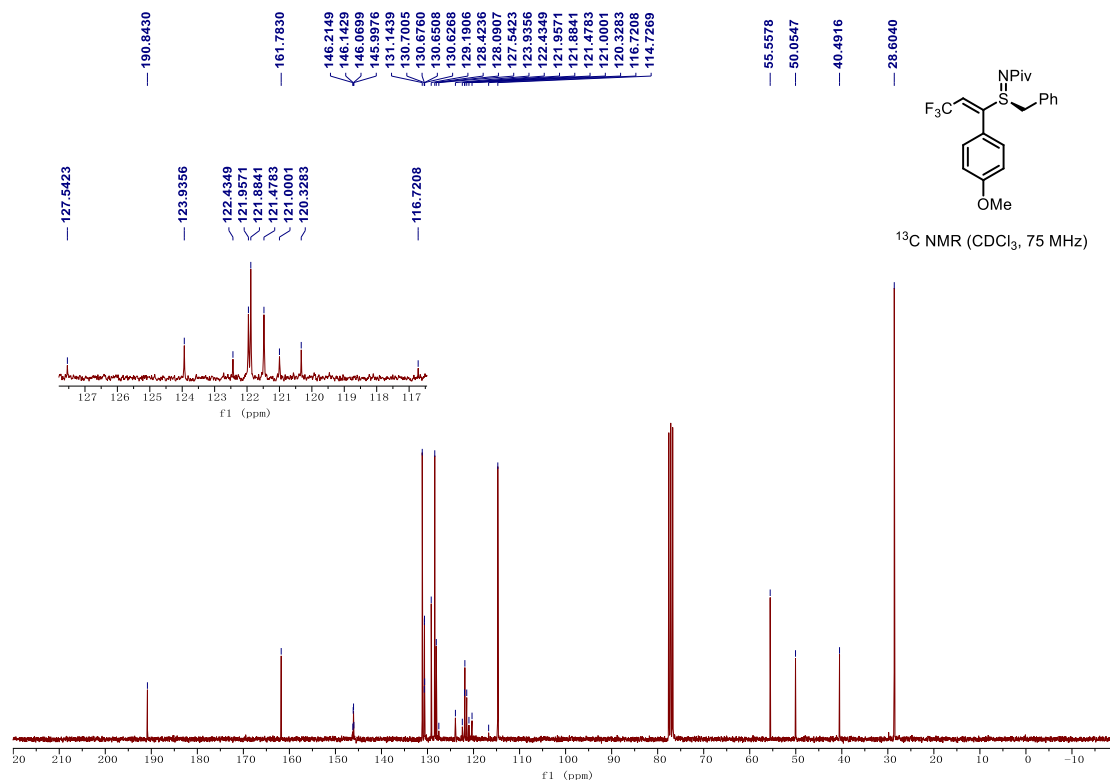

# <sup>19</sup>F NMR Spectrum of 4m

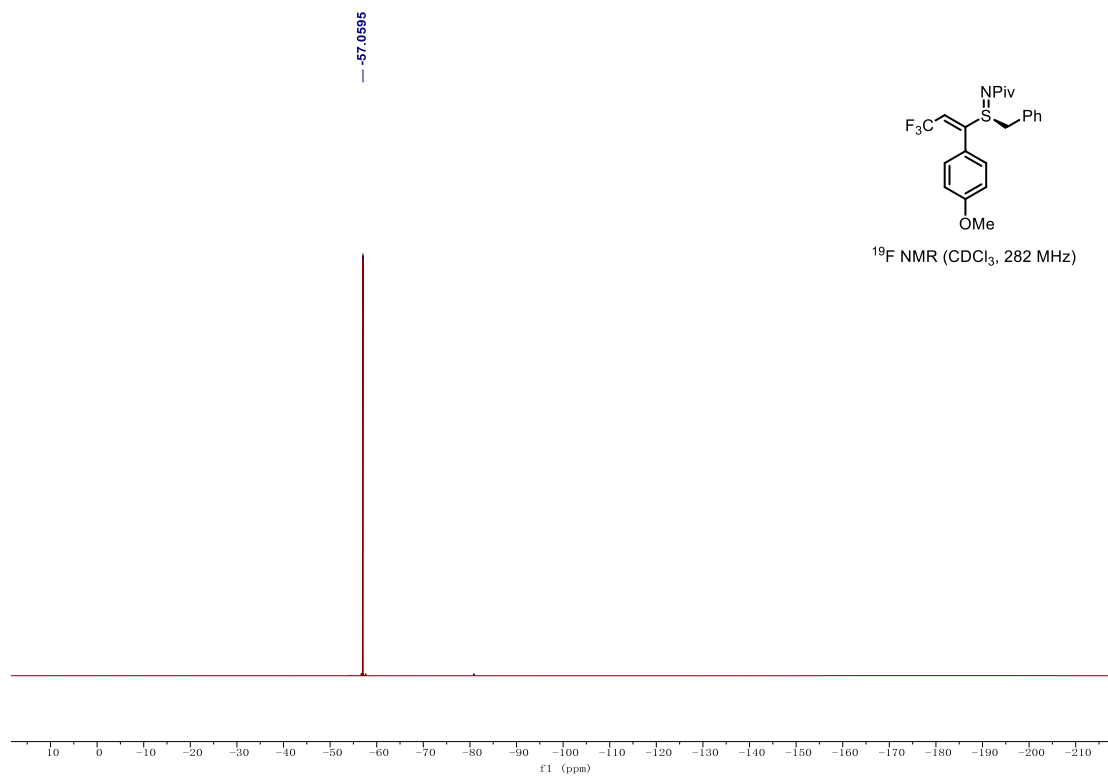

### <sup>1</sup>H NMR Spectrum of 4n

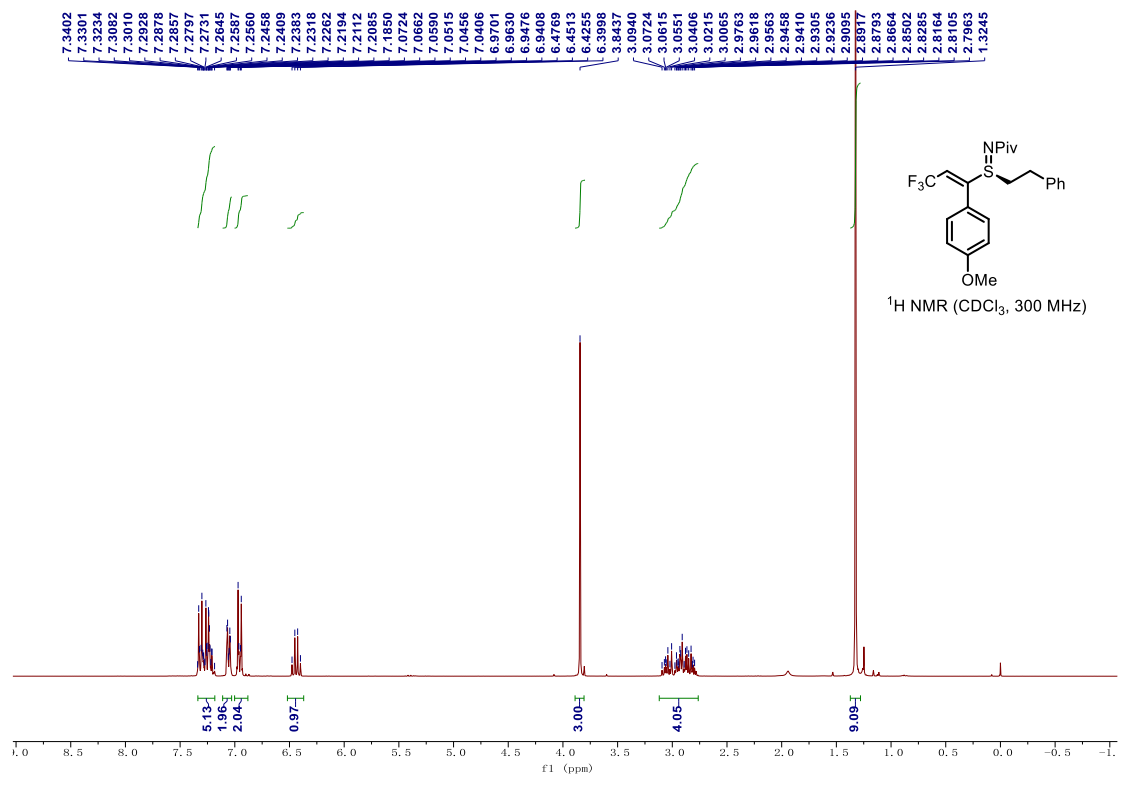

### <sup>13</sup>C NMR Spectrum of 4n

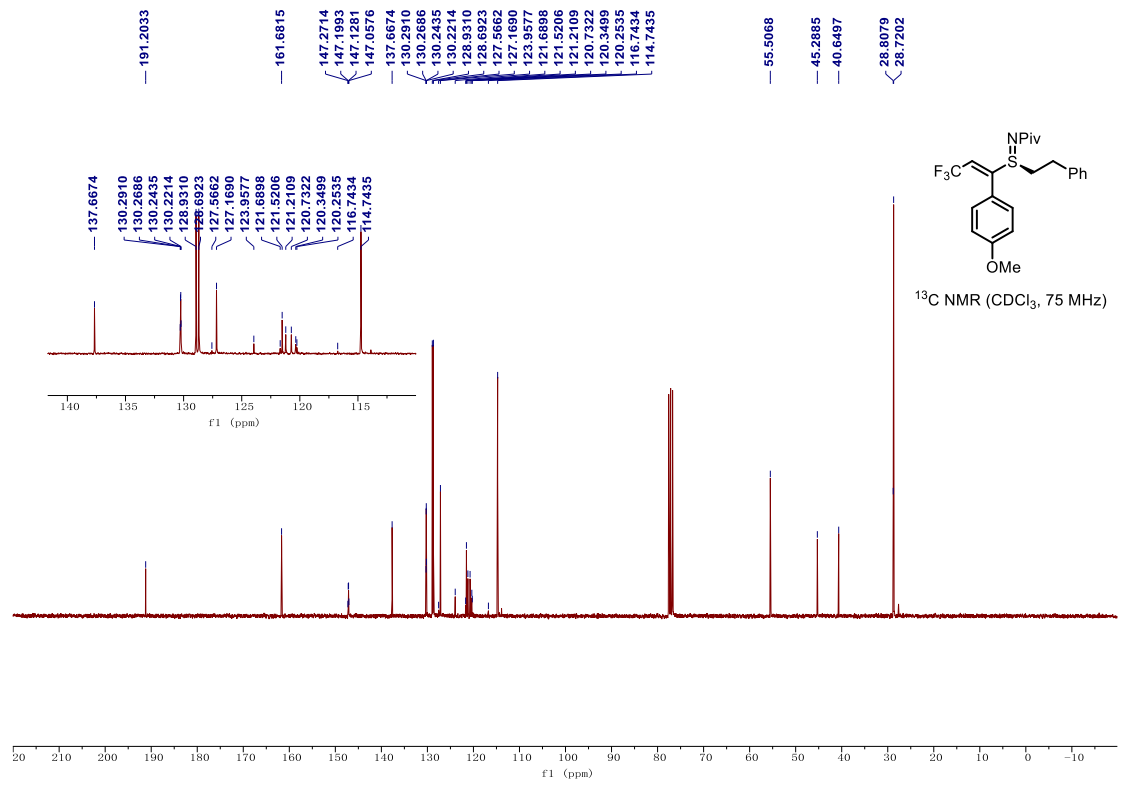

# <sup>19</sup>F NMR Spectrum of 4n

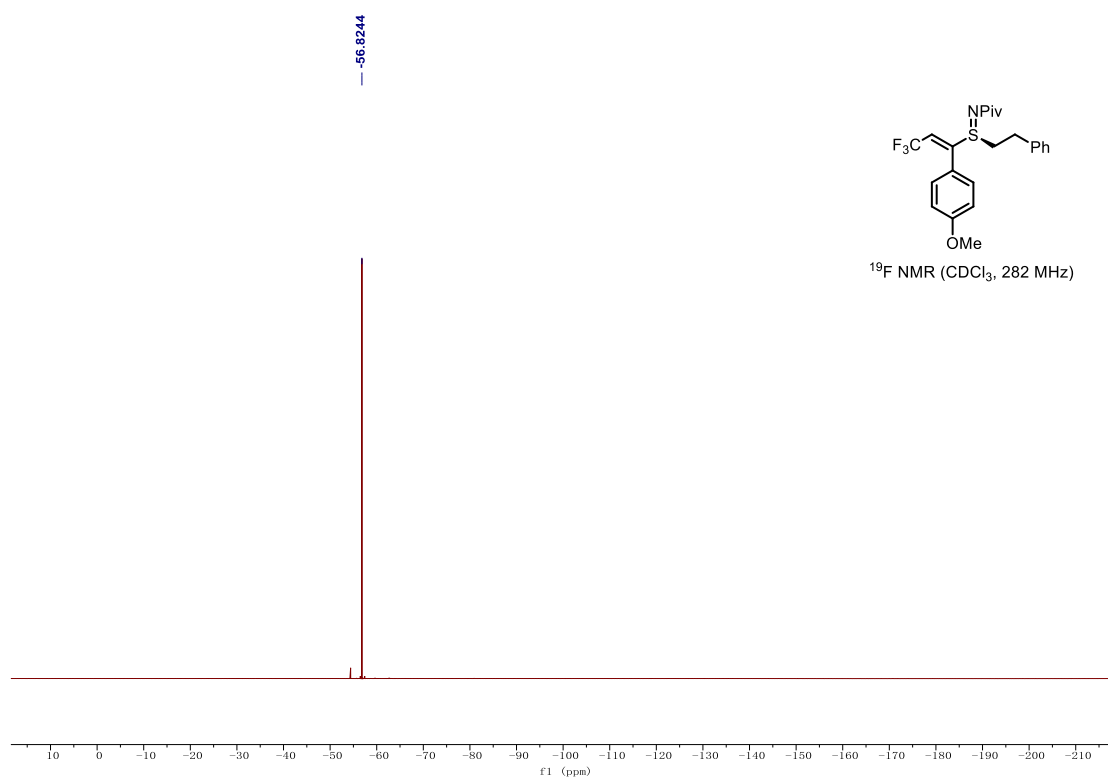

# <sup>1</sup>H NMR Spectrum of 4o

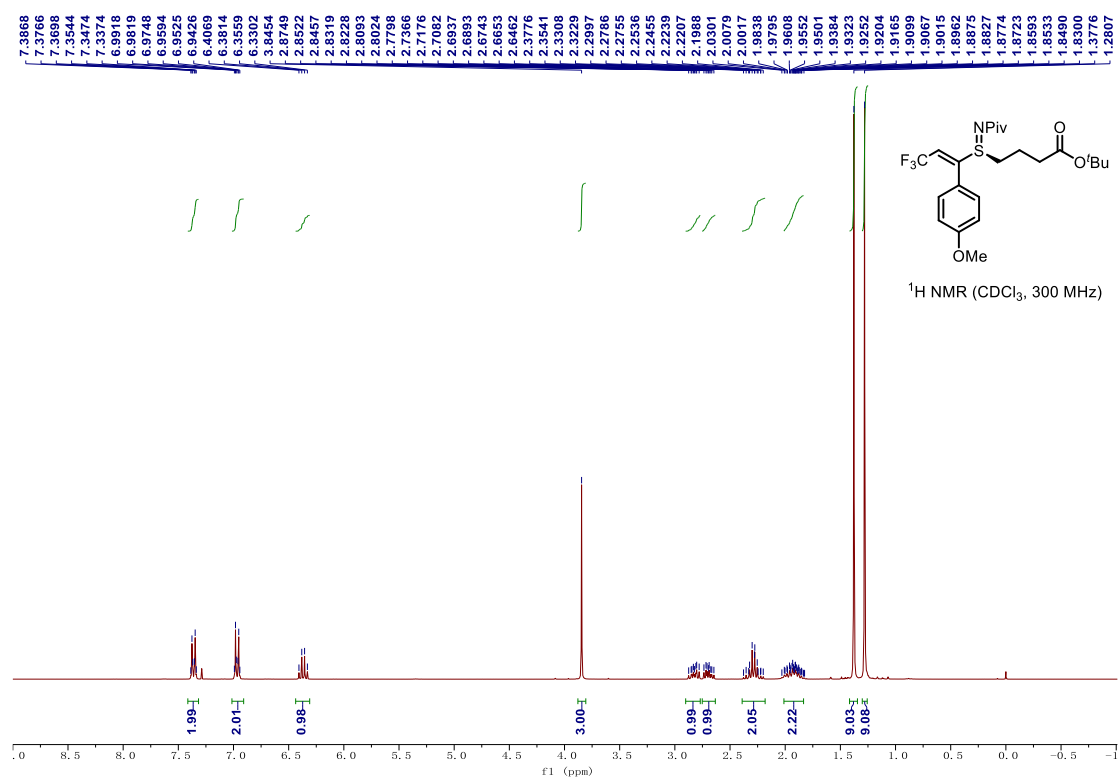

# <sup>19</sup>F NMR Spectrum of 4o

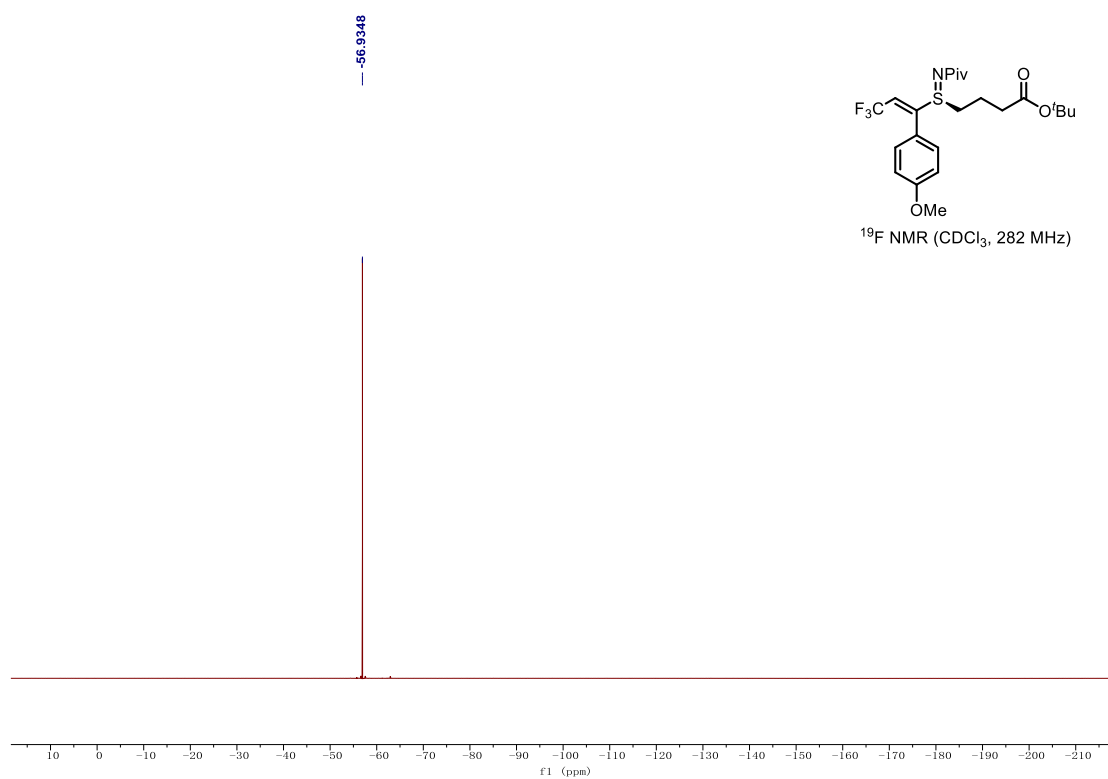

### <sup>1</sup>H NMR Spectrum of 4p

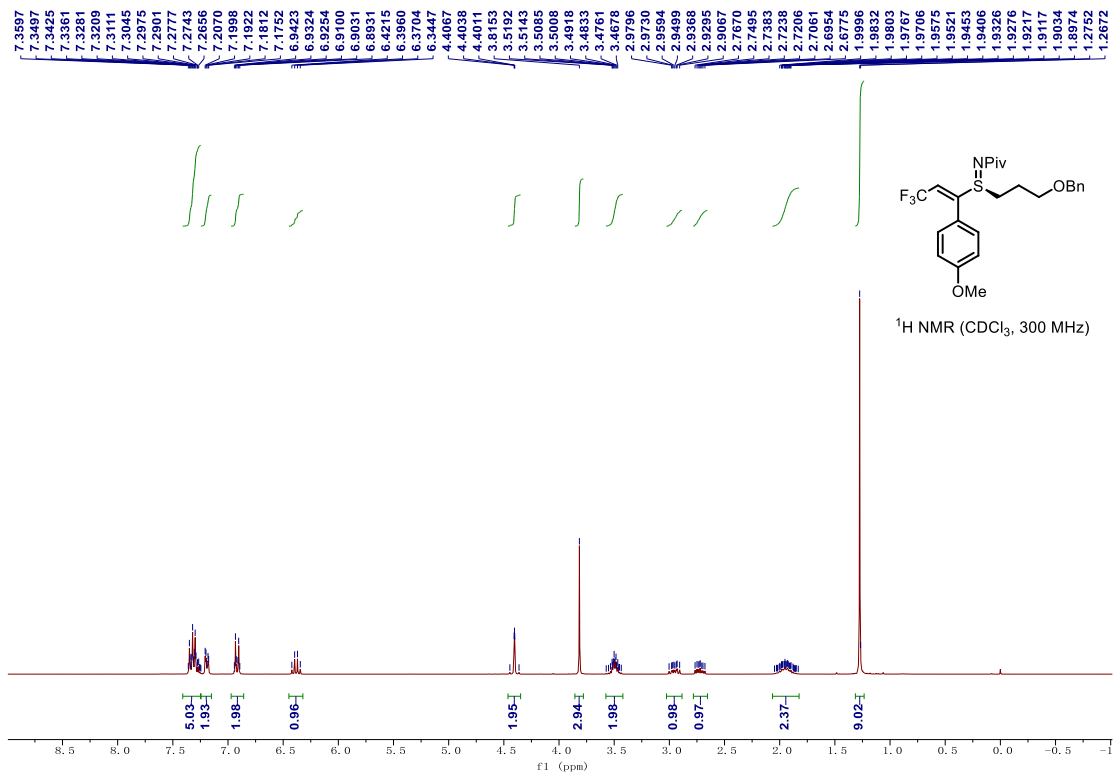

### <sup>13</sup>C NMR Spectrum of 4p

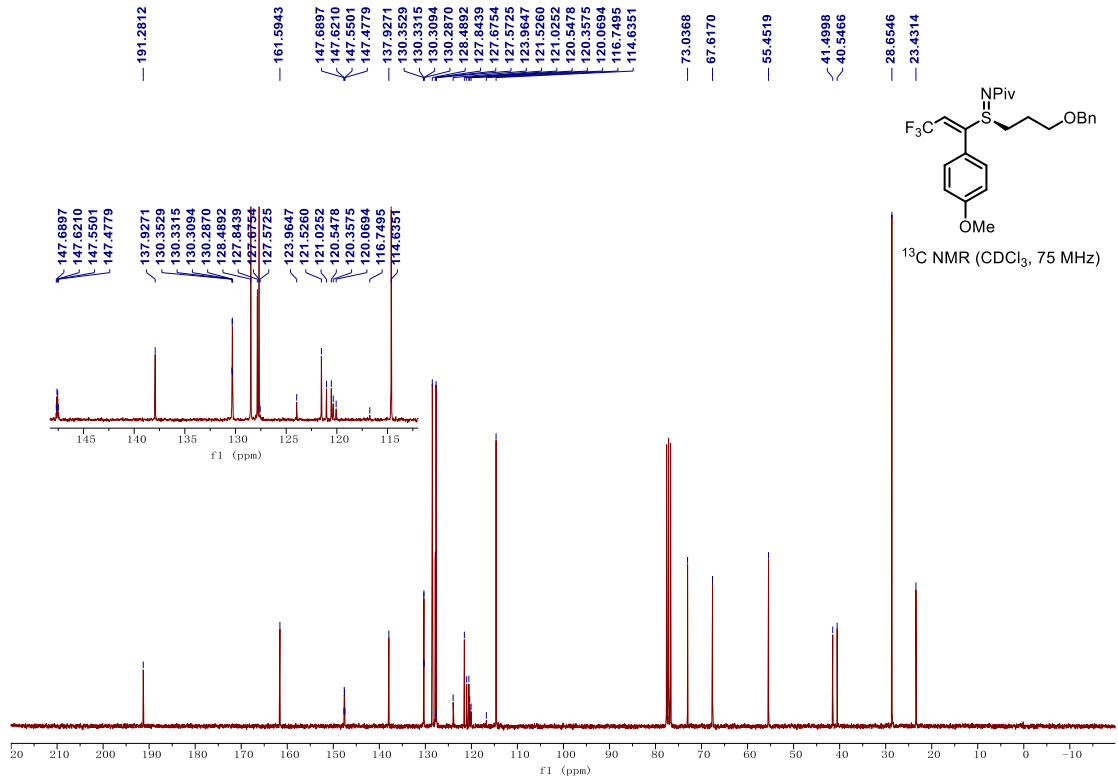

# <sup>19</sup>F NMR Spectrum of 4p

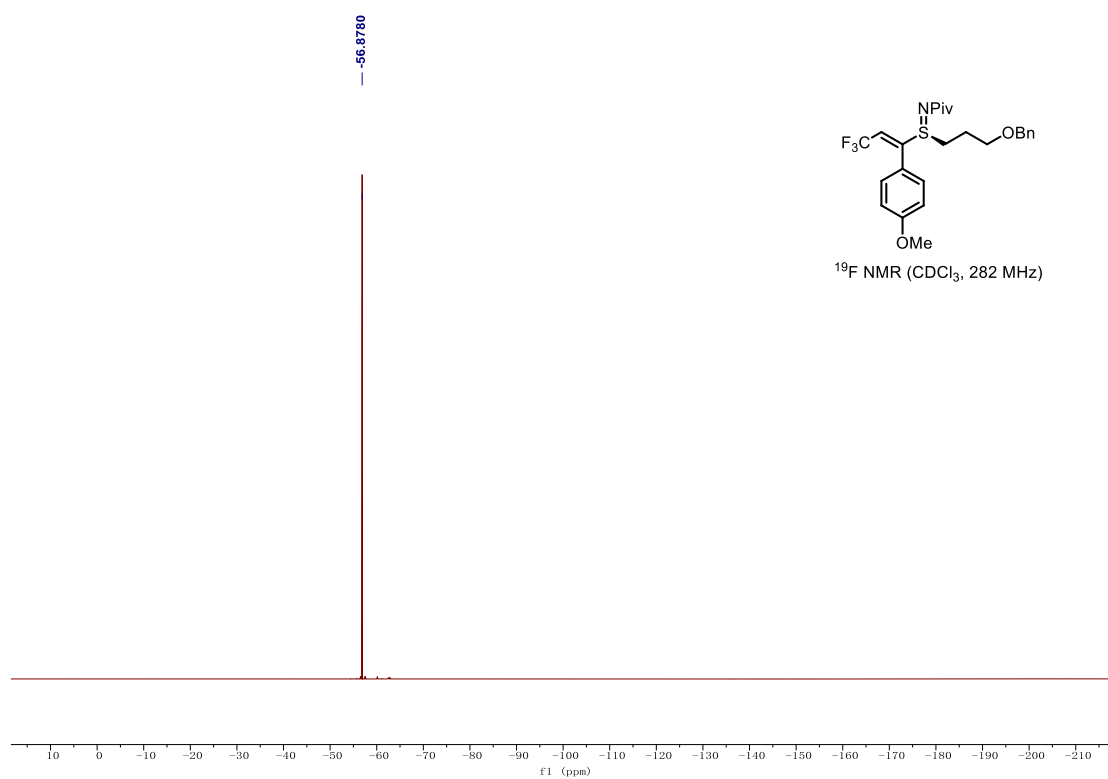

### <sup>1</sup>H NMR Spectrum of 4q

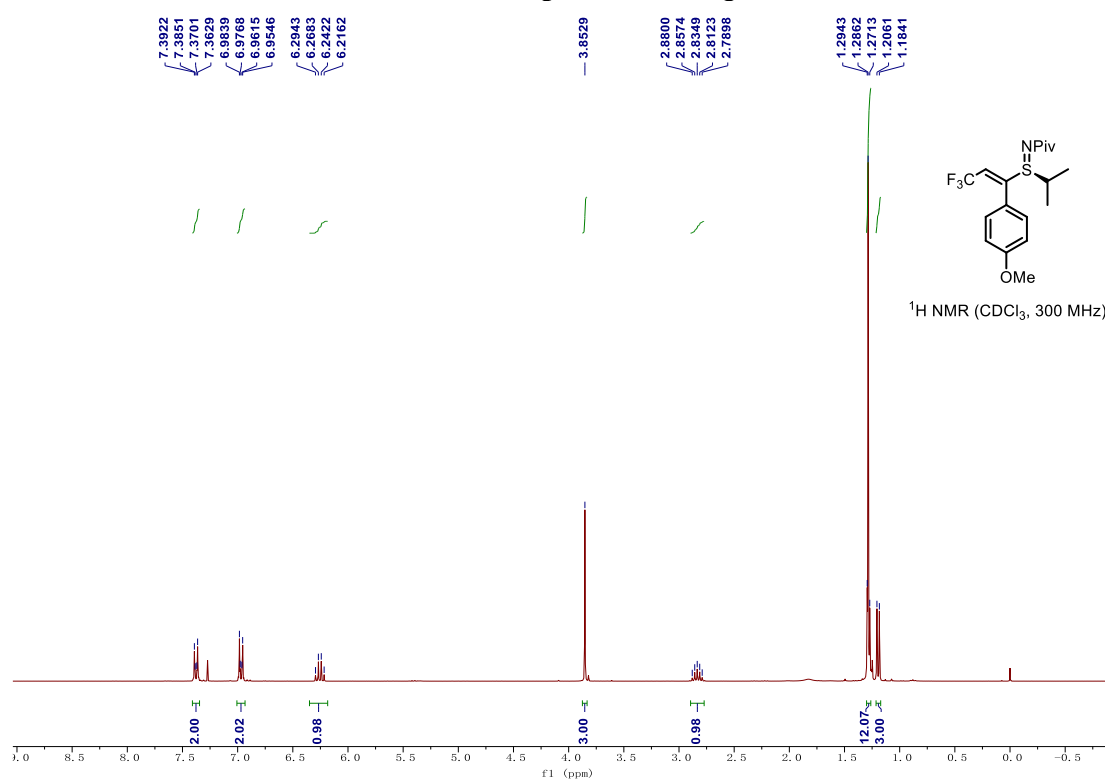

### <sup>13</sup>C NMR Spectrum of 4q

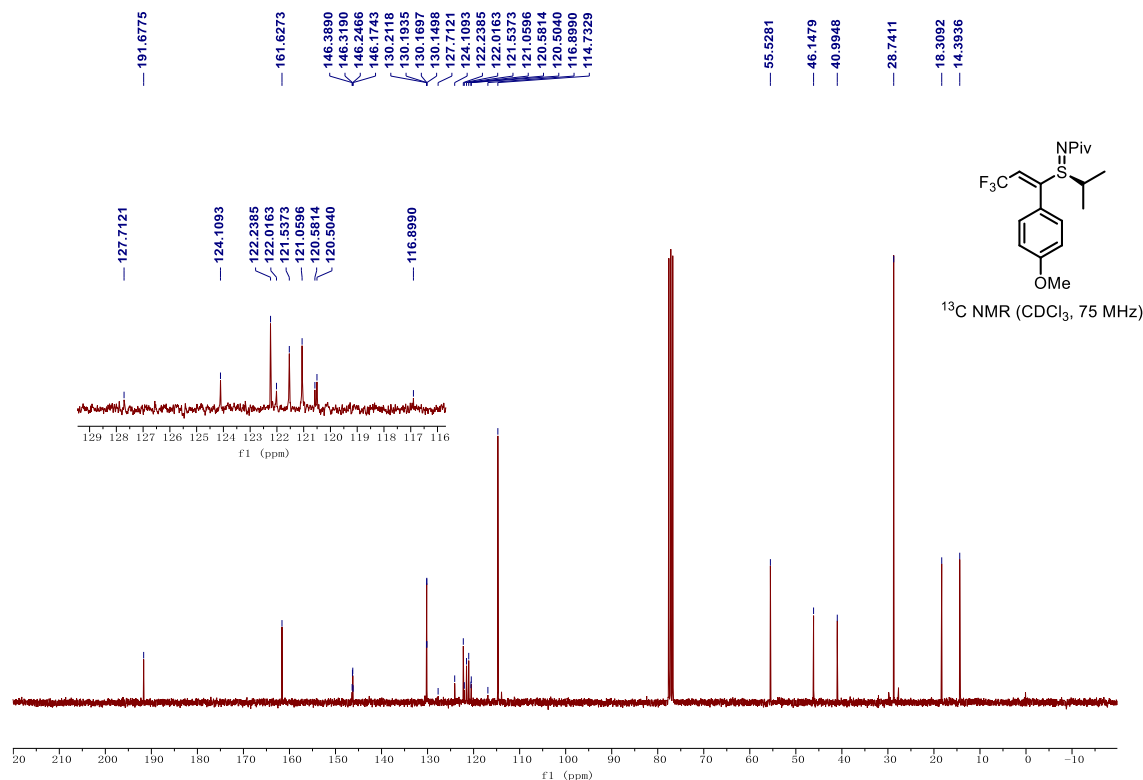

# <sup>19</sup>F NMR Spectrum of 4q

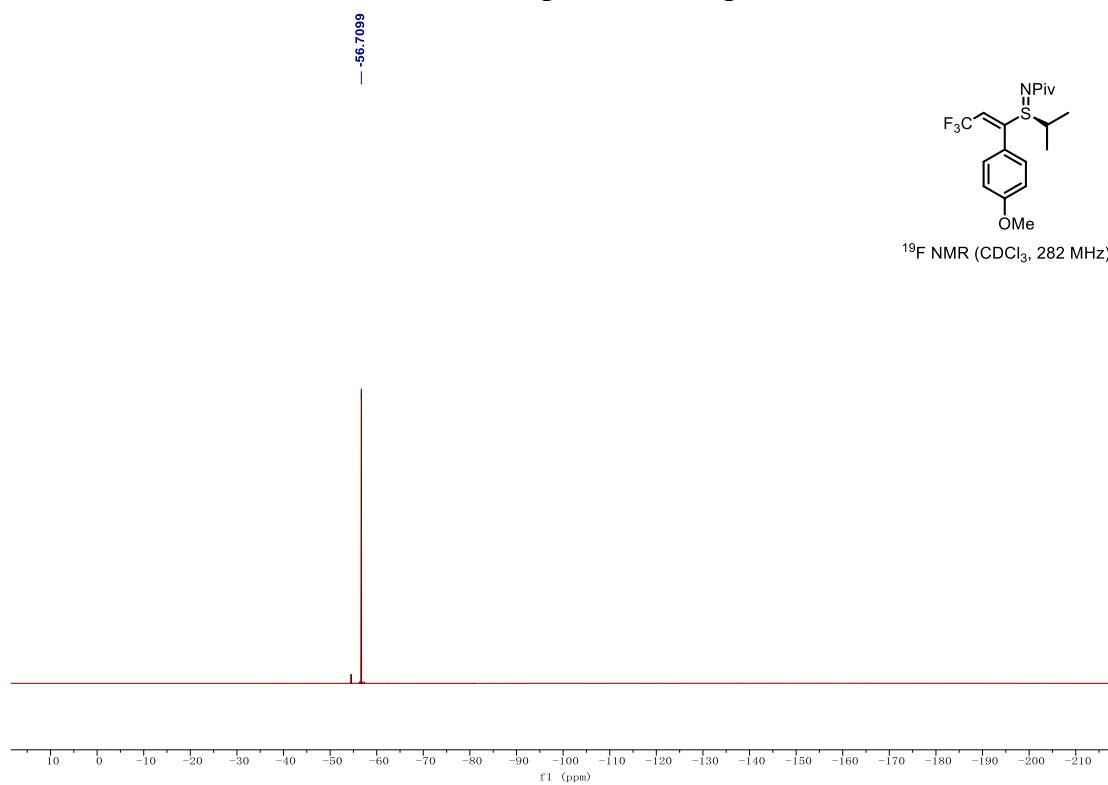

### <sup>1</sup>H NMR Spectrum of 4r

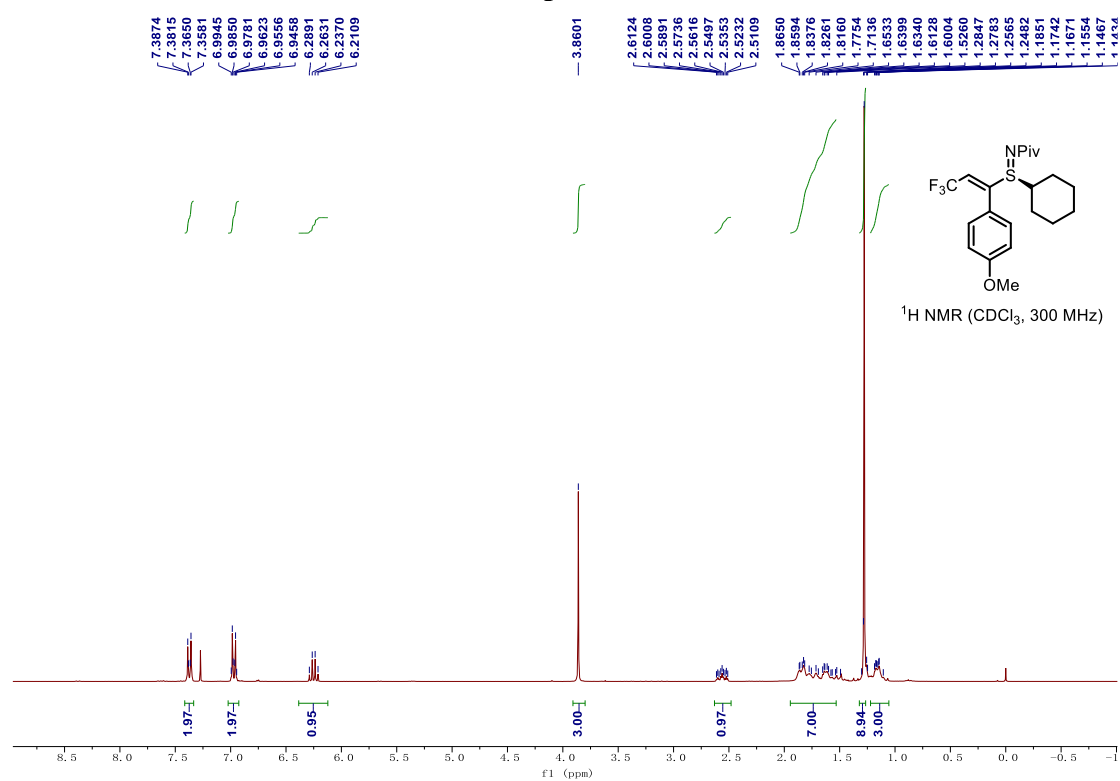

### <sup>13</sup>C NMR Spectrum of 4r

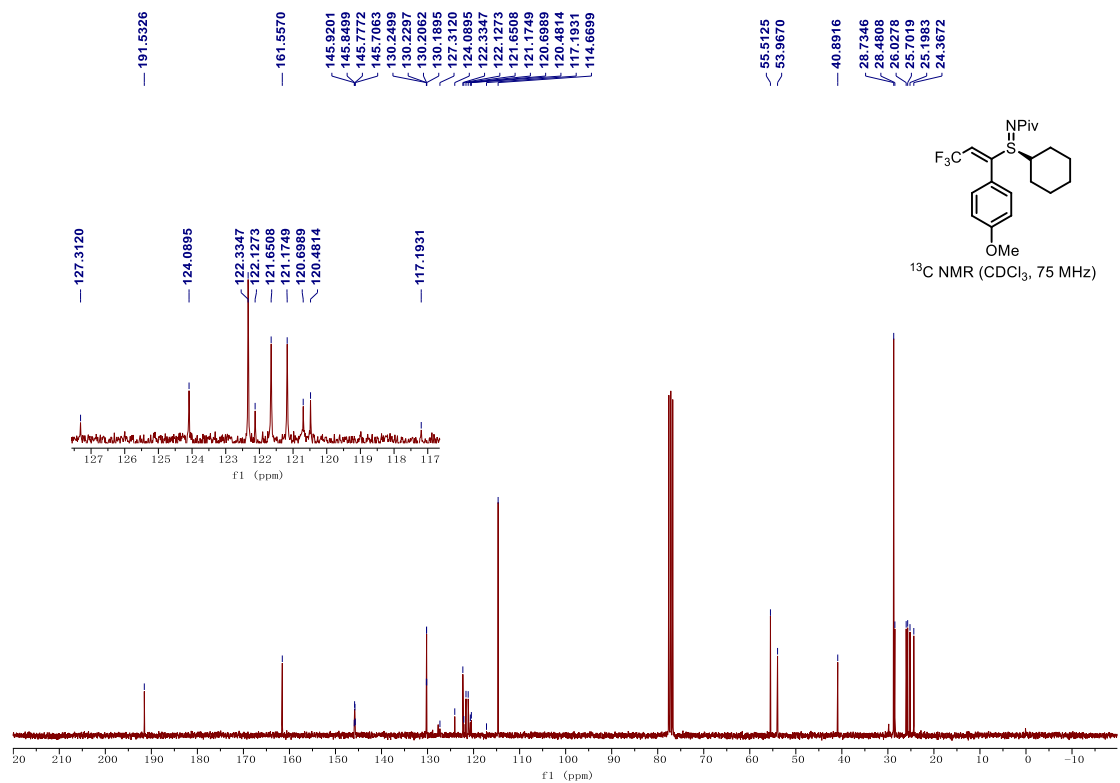

# <sup>19</sup>F NMR Spectrum of 4r

-56.6731

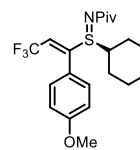

<sup>19</sup>F NMR (CDCl<sub>3</sub>, 282 MHz)

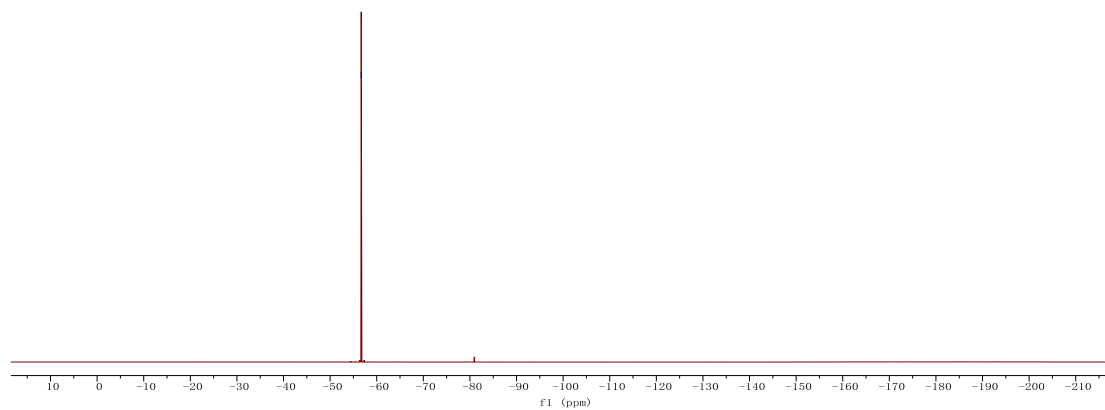

### <sup>1</sup>H NMR Spectrum of 4s

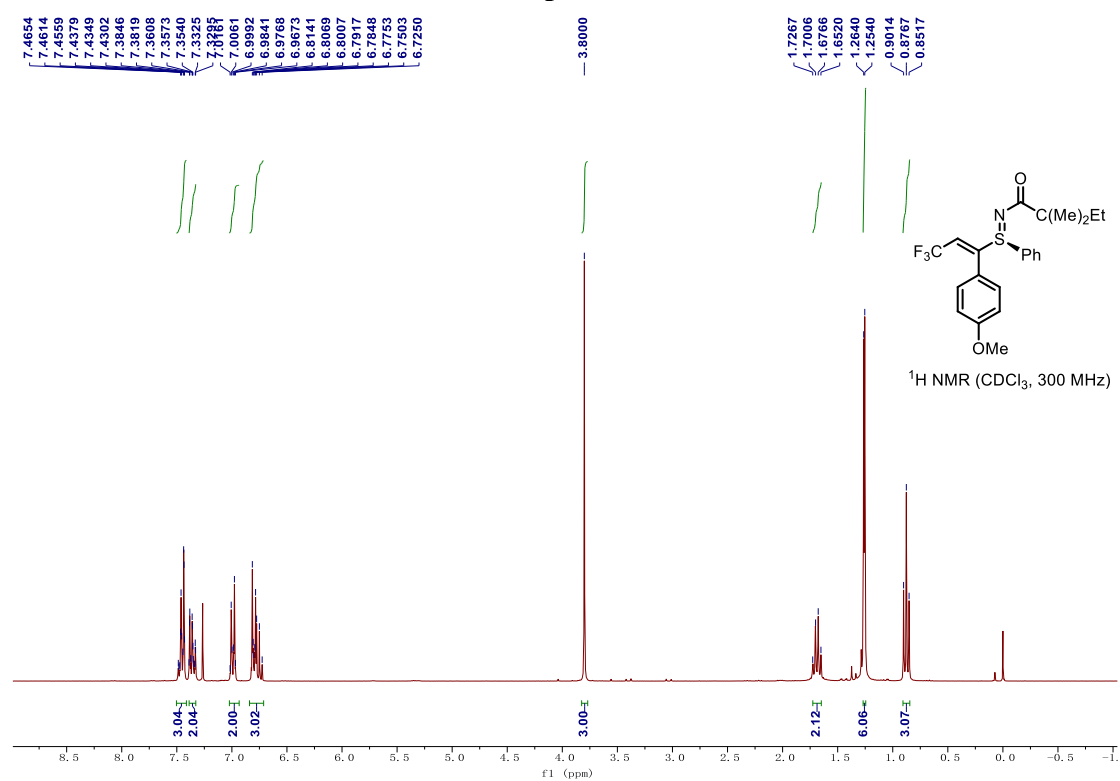

### <sup>13</sup>C NMR Spectrum of 4s

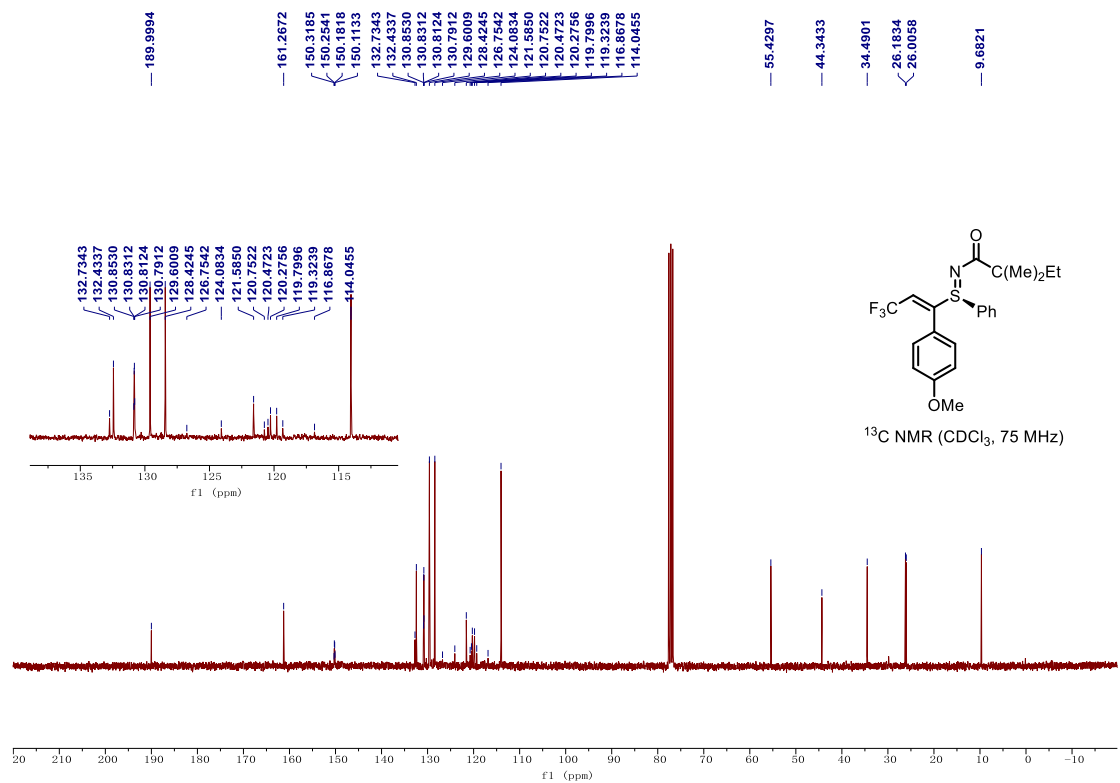

# <sup>19</sup>F NMR Spectrum of 4s

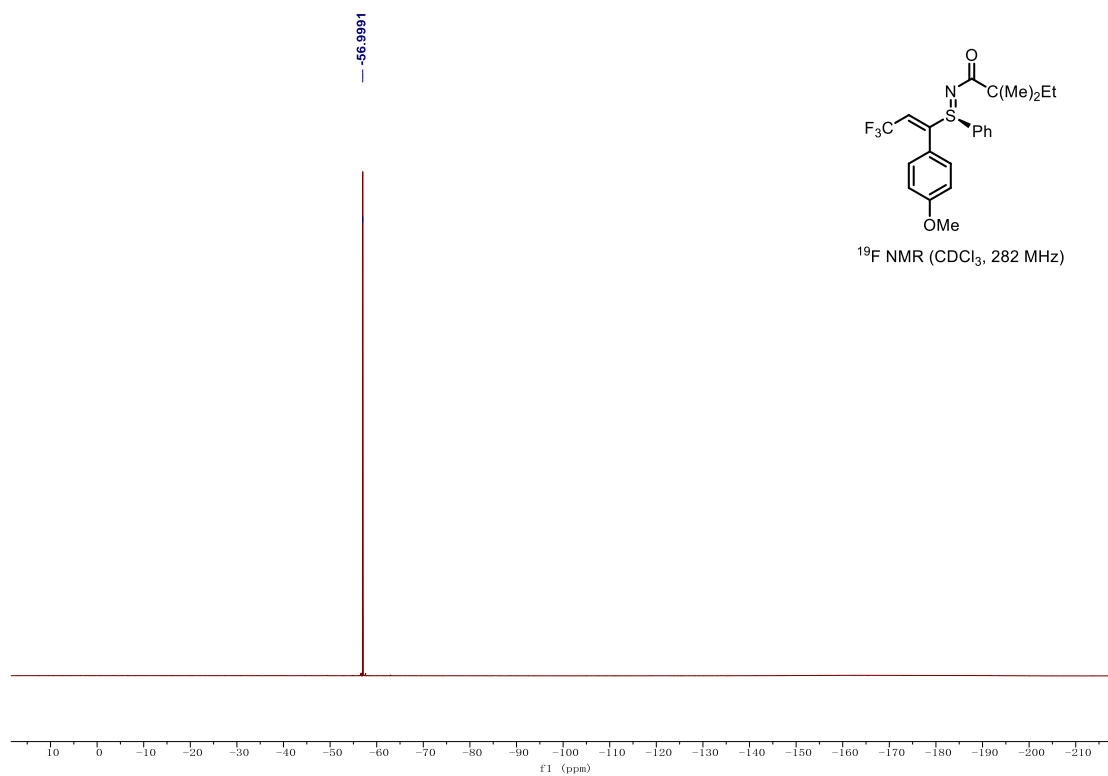

### <sup>1</sup>H NMR Spectrum of 4t

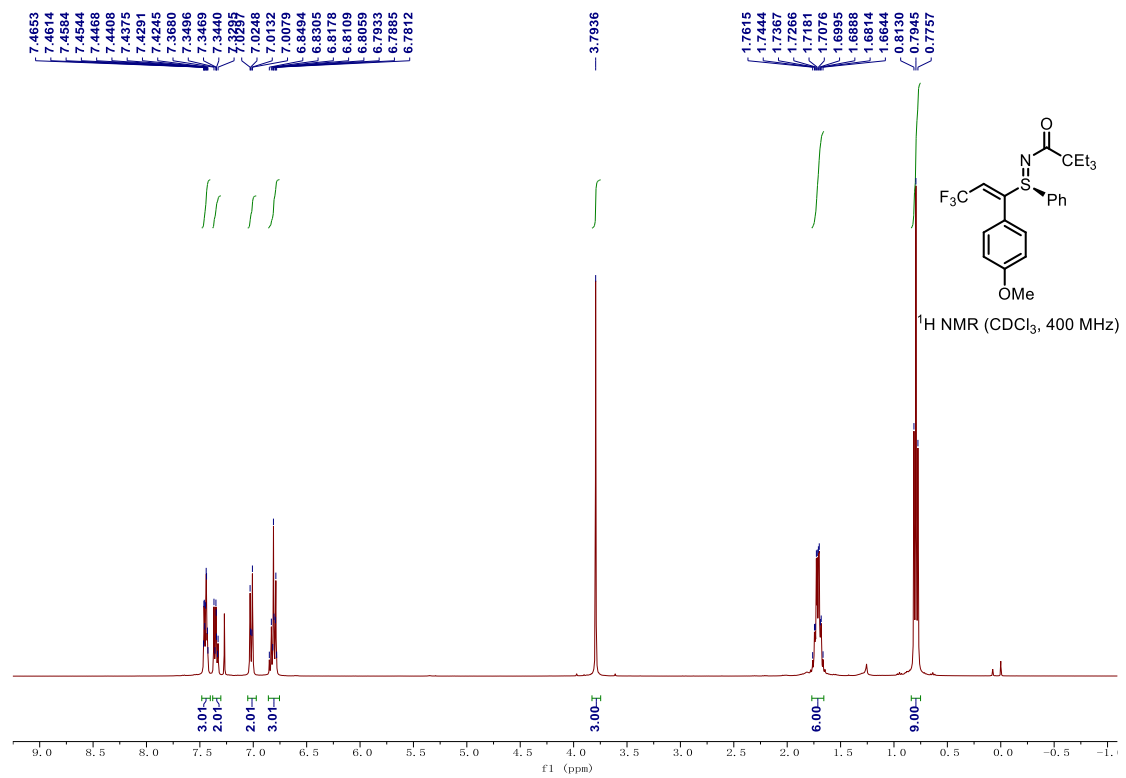

### <sup>13</sup>C NMR Spectrum of 4t

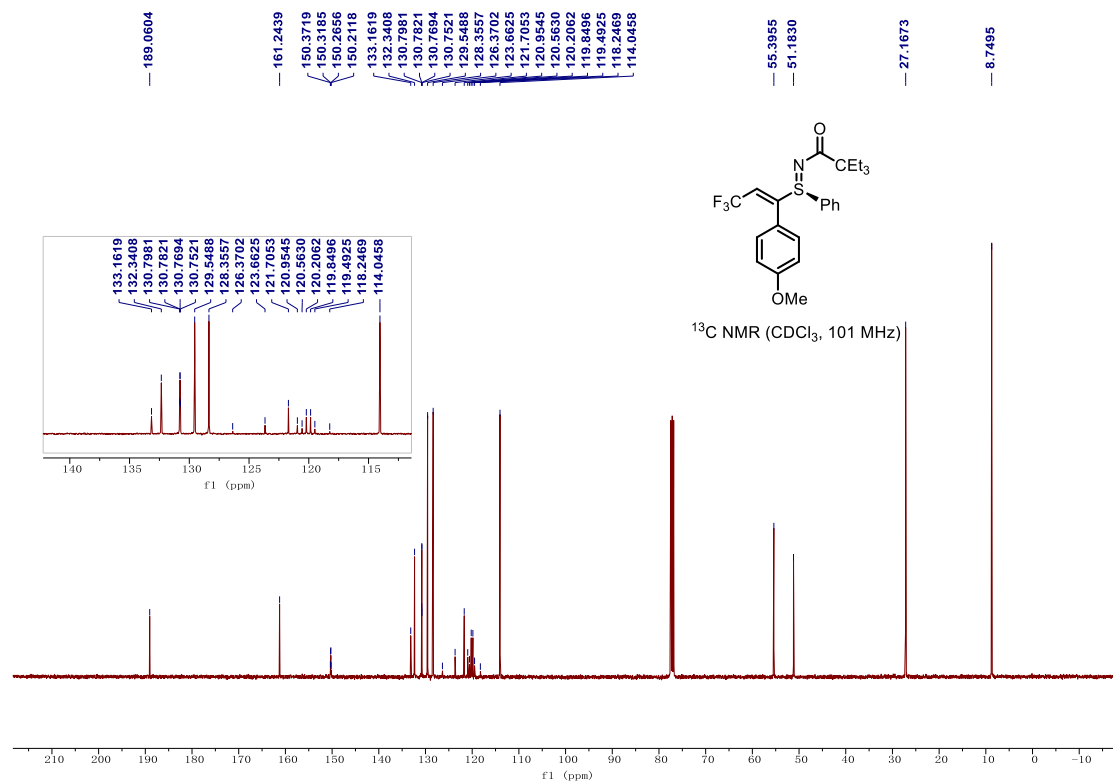

# <sup>19</sup>F NMR Spectrum of 4t

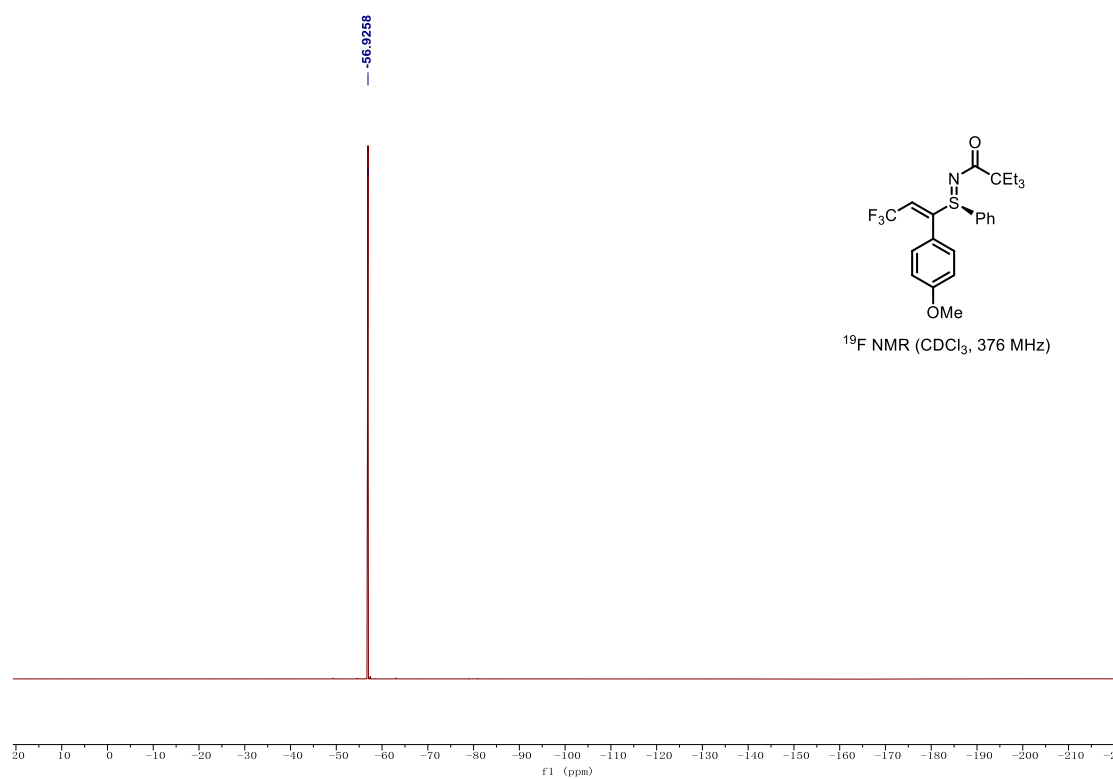

### <sup>1</sup>H NMR Spectrum of 4u

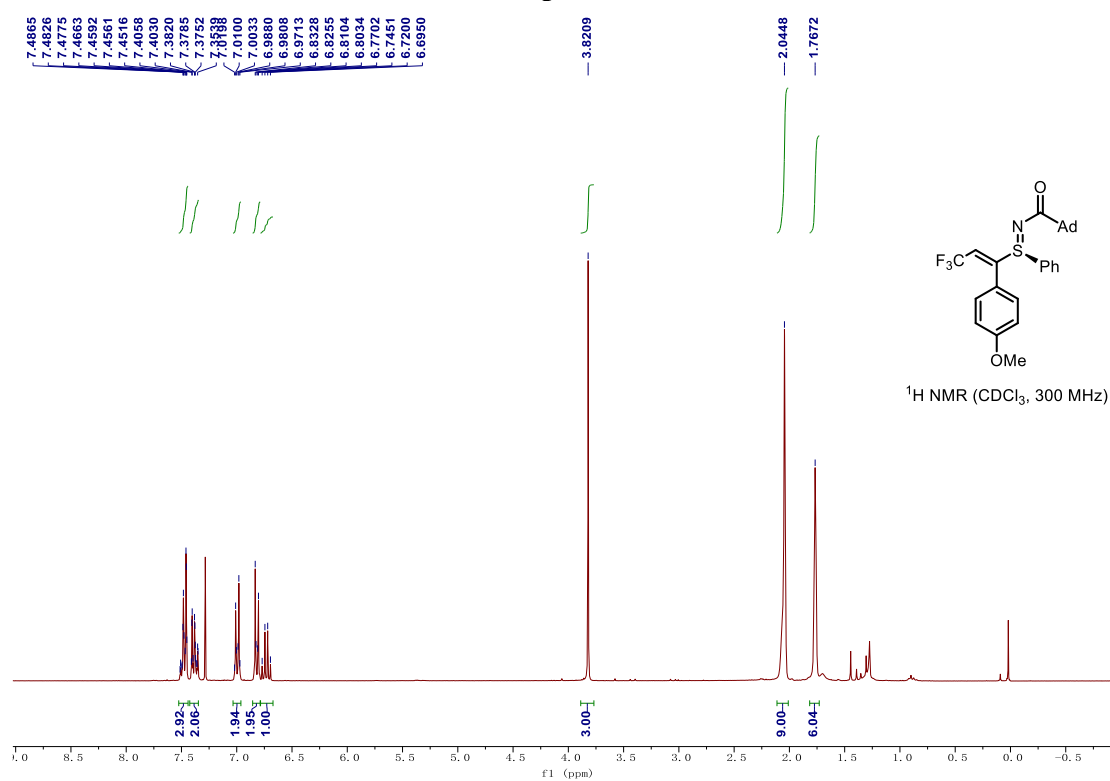

### <sup>13</sup>C NMR Spectrum of 4u

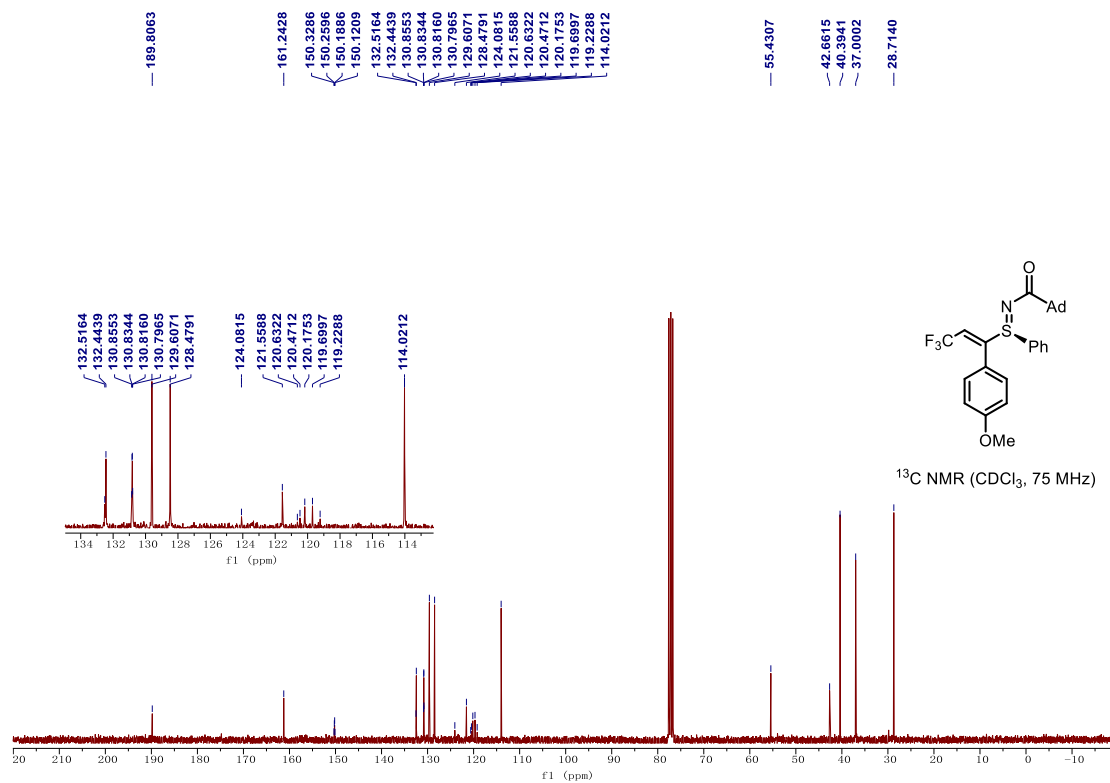

# <sup>19</sup>F NMR Spectrum of 4u

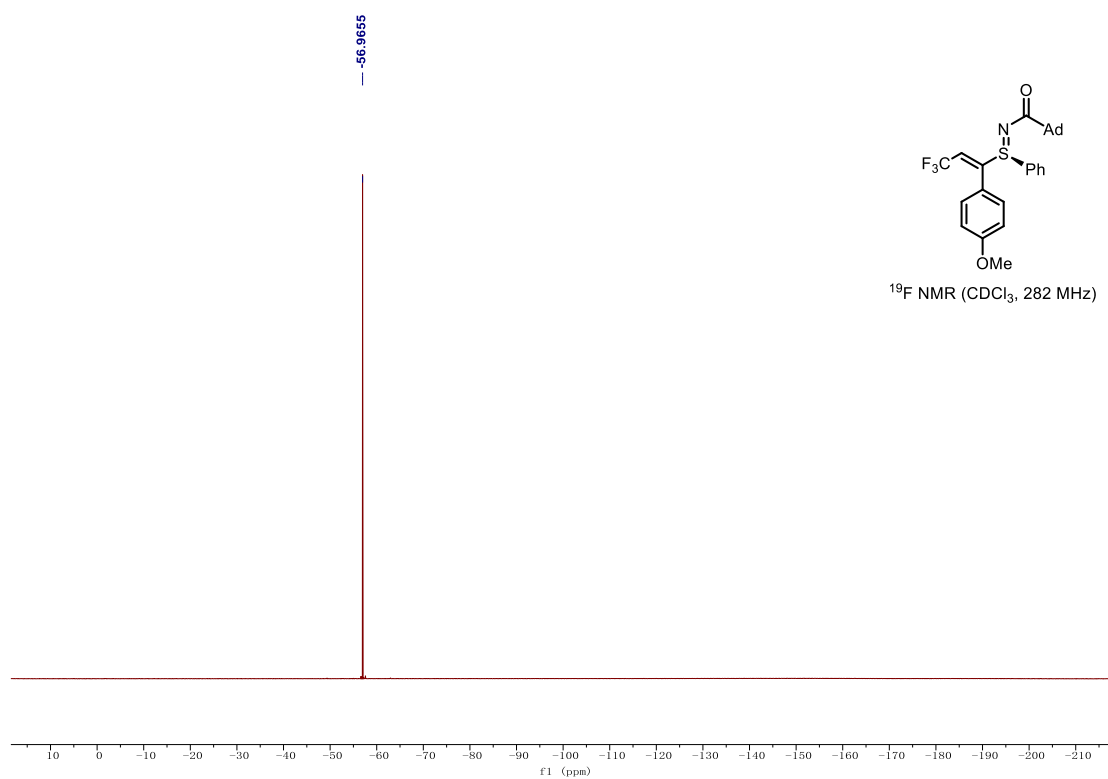

### <sup>1</sup>H NMR Spectrum of 4v

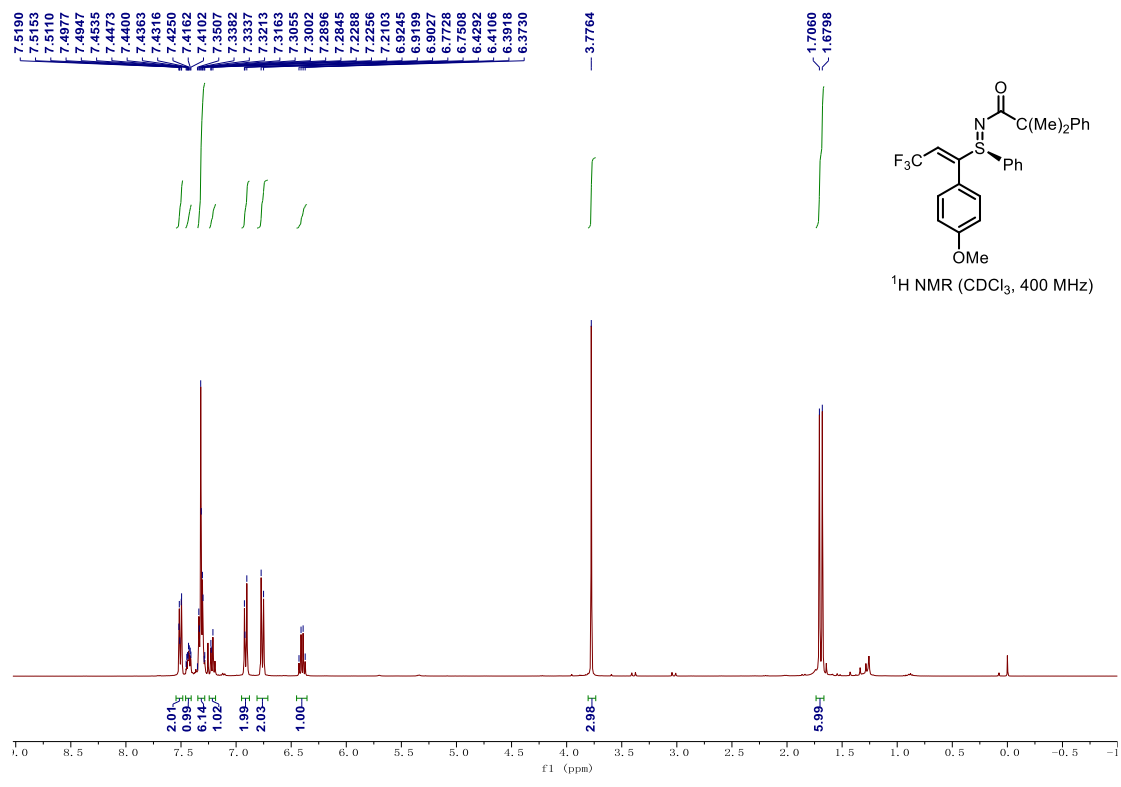

### <sup>13</sup>C NMR Spectrum of 4v

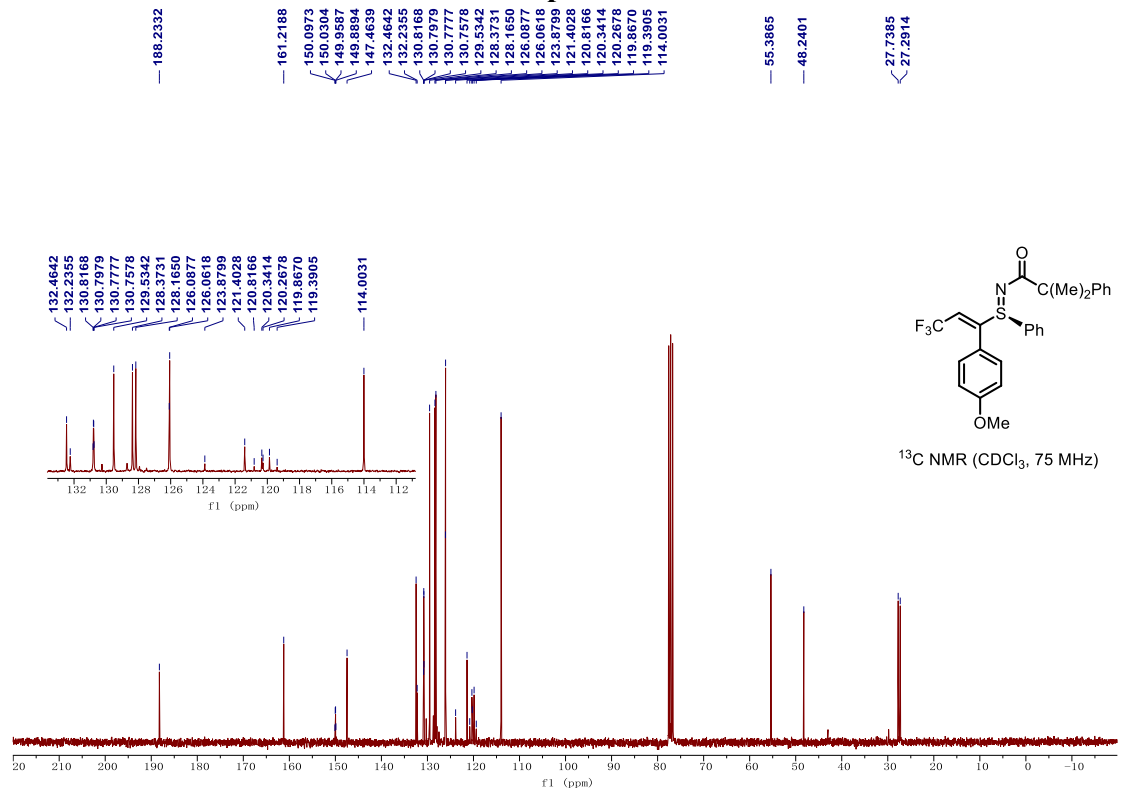

# <sup>19</sup>F NMR Spectrum of 4v

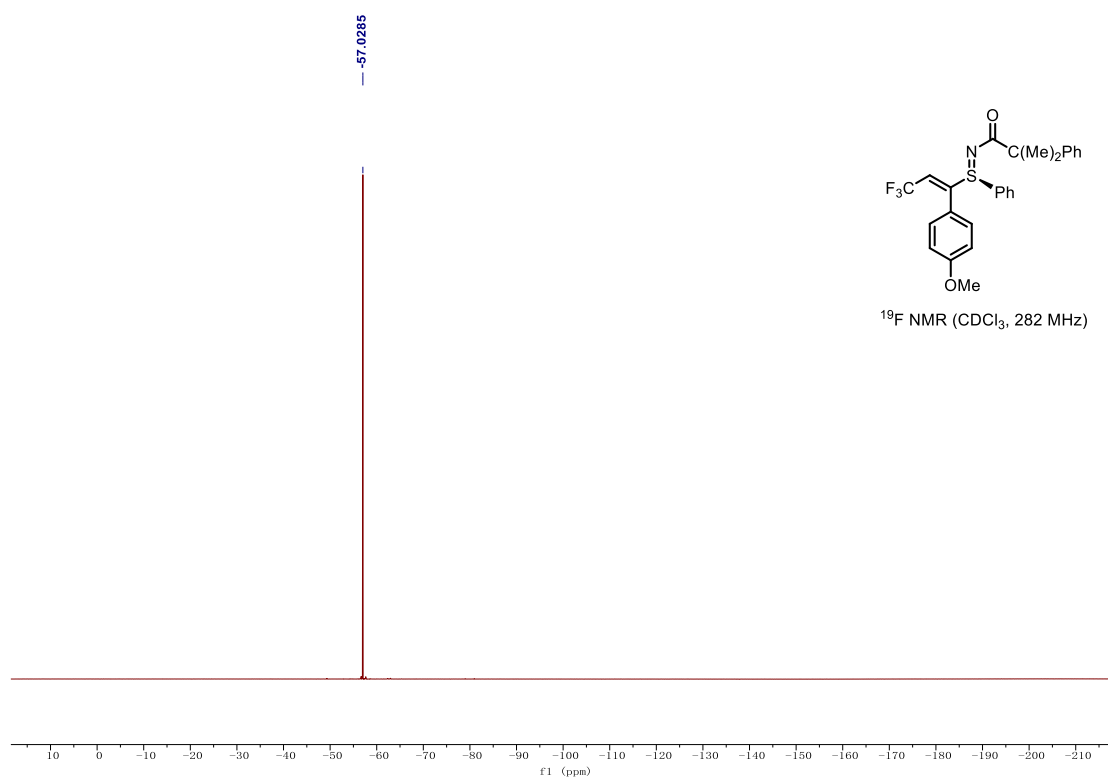

### <sup>1</sup>H NMR Spectrum of 4w

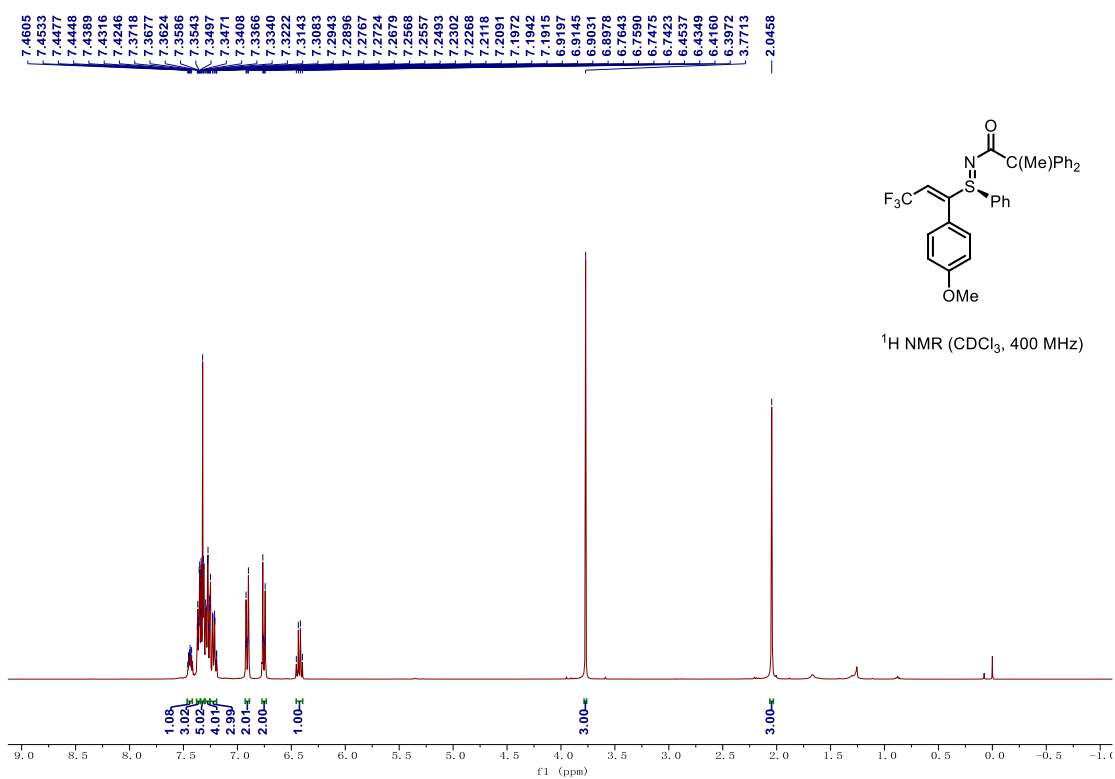

### <sup>13</sup>C NMR Spectrum of 4w

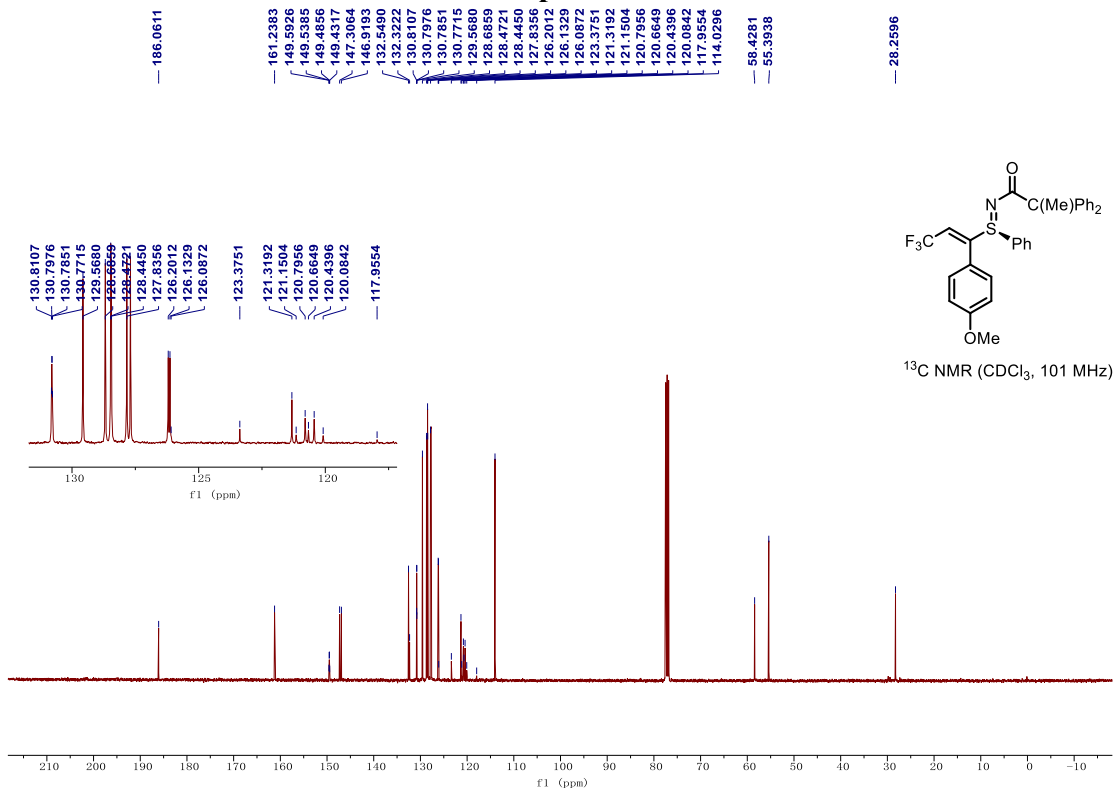

# <sup>19</sup>F NMR Spectrum of 4w

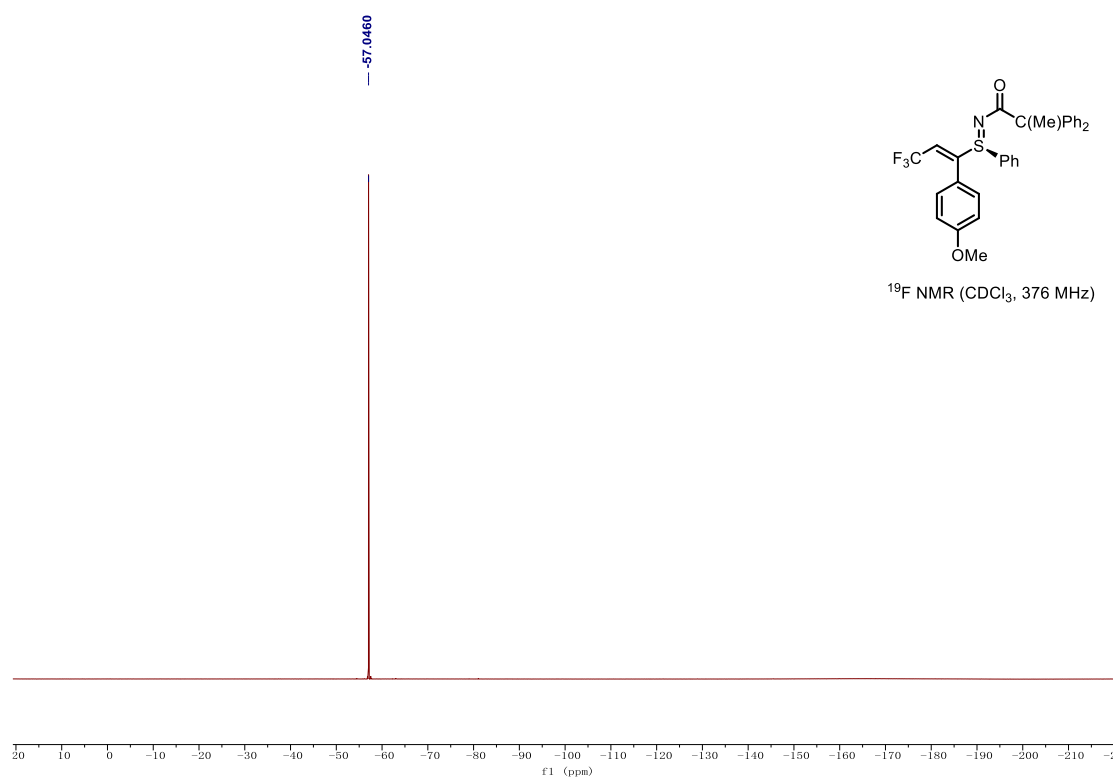

### <sup>1</sup>H NMR Spectrum of 4x

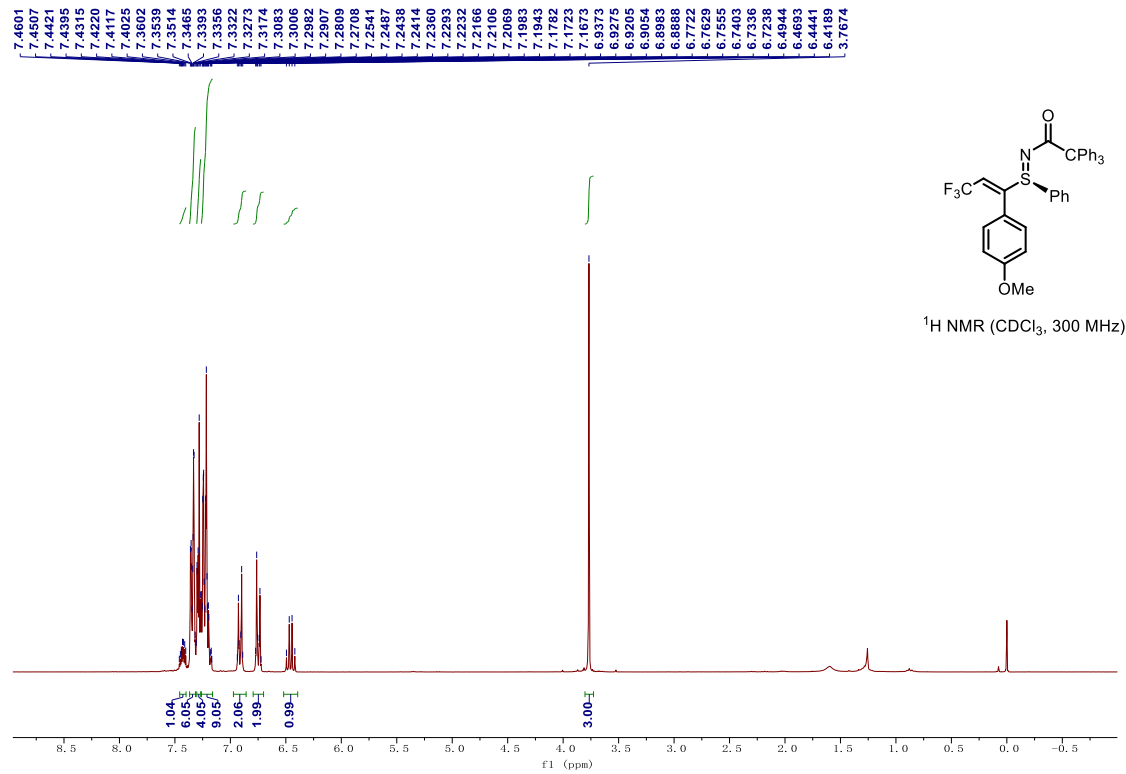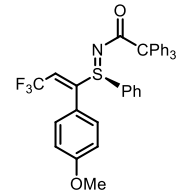

<sup>1</sup>H NMR (CDCl<sub>3</sub>, 300 MHz)

### <sup>13</sup>C NMR Spectrum of 4x

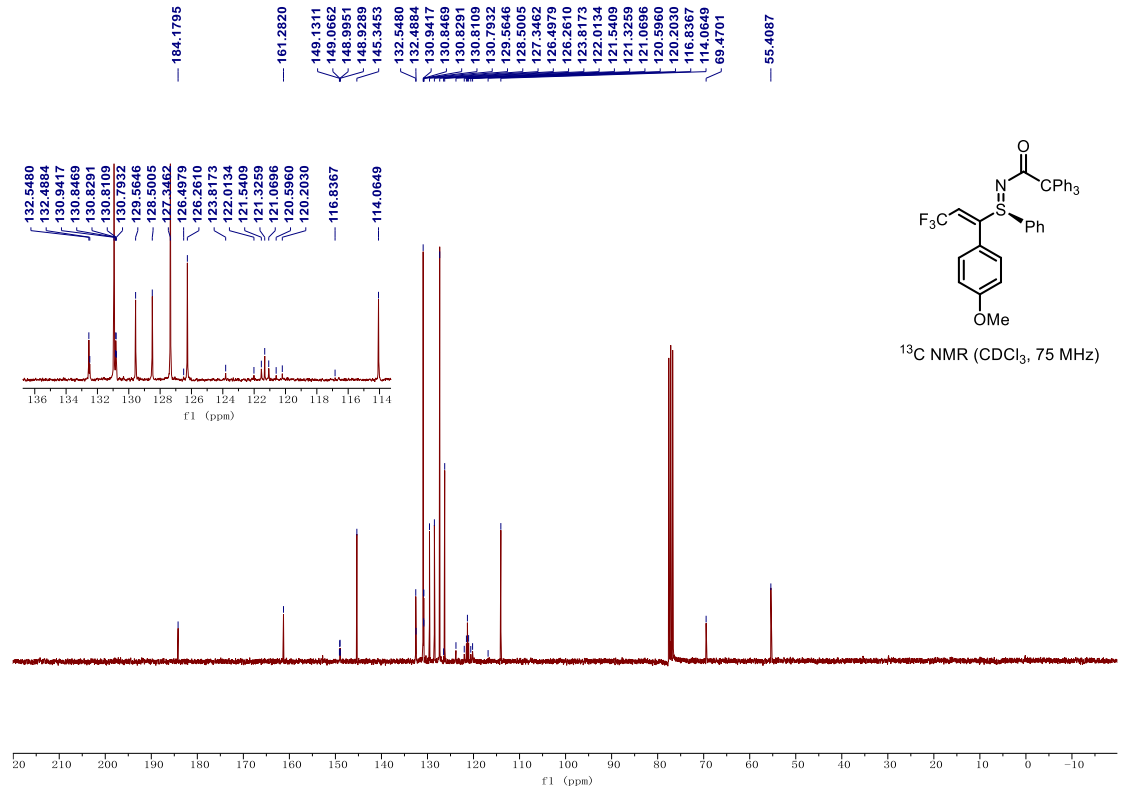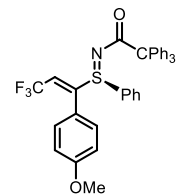

<sup>13</sup>C NMR (CDCl<sub>3</sub>, 75 MHz)

# <sup>19</sup>F NMR Spectrum of 4x

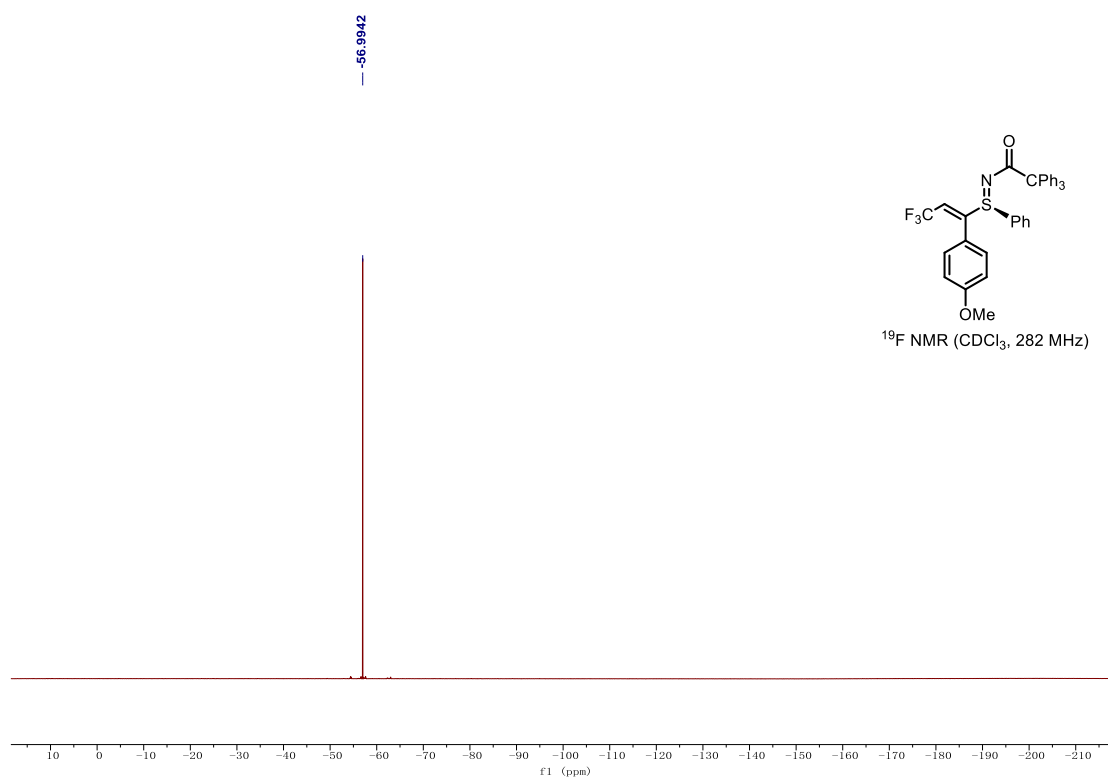

### <sup>1</sup>H NMR Spectrum of 4y

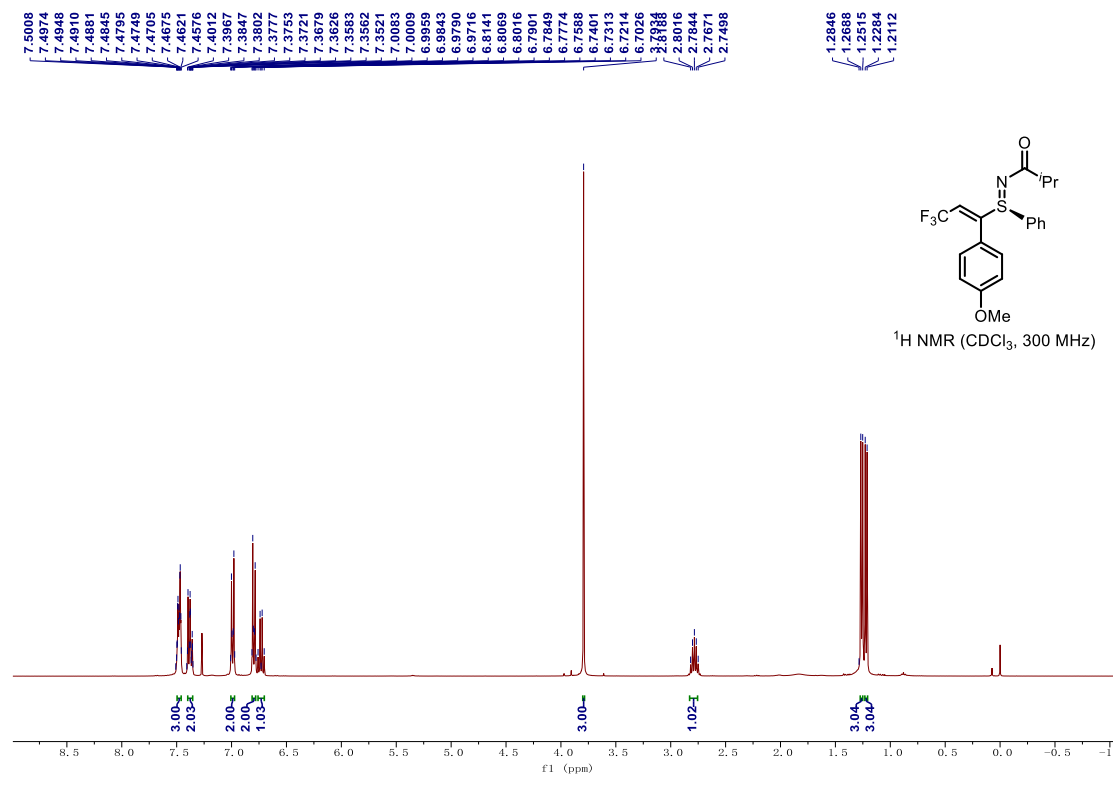

### <sup>13</sup>C NMR Spectrum of 4y

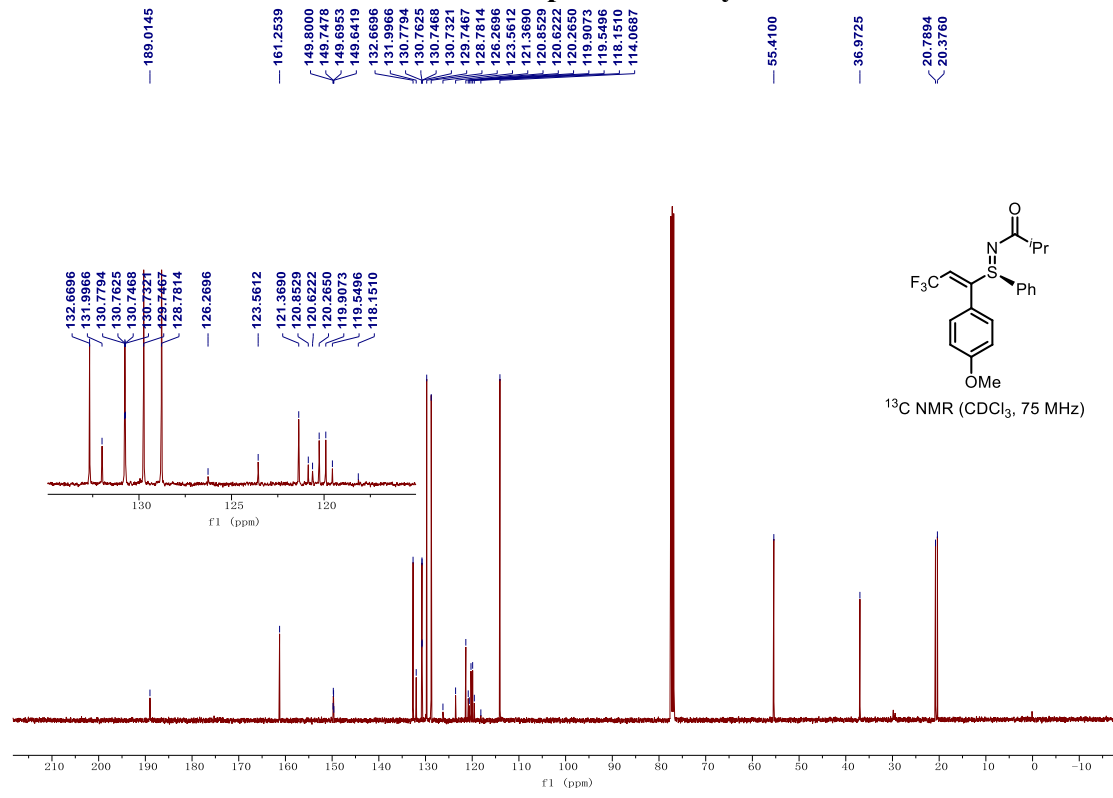

# <sup>19</sup>F NMR Spectrum of 4y

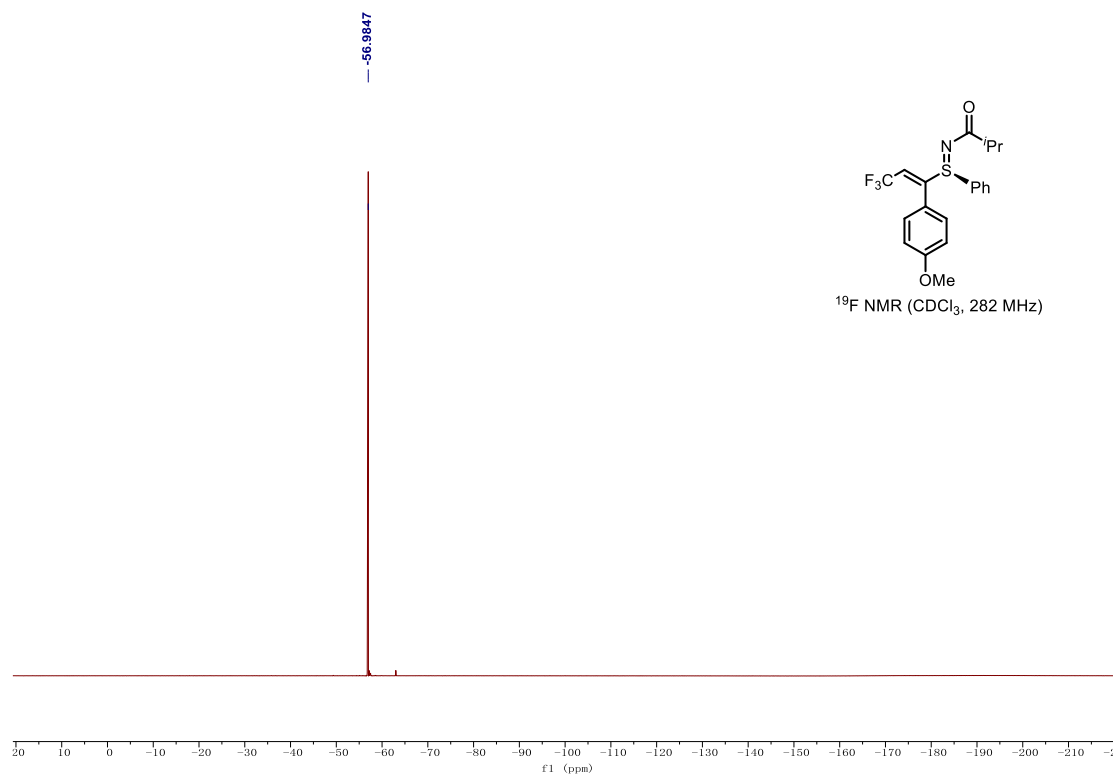

### <sup>1</sup>H NMR Spectrum of 4z

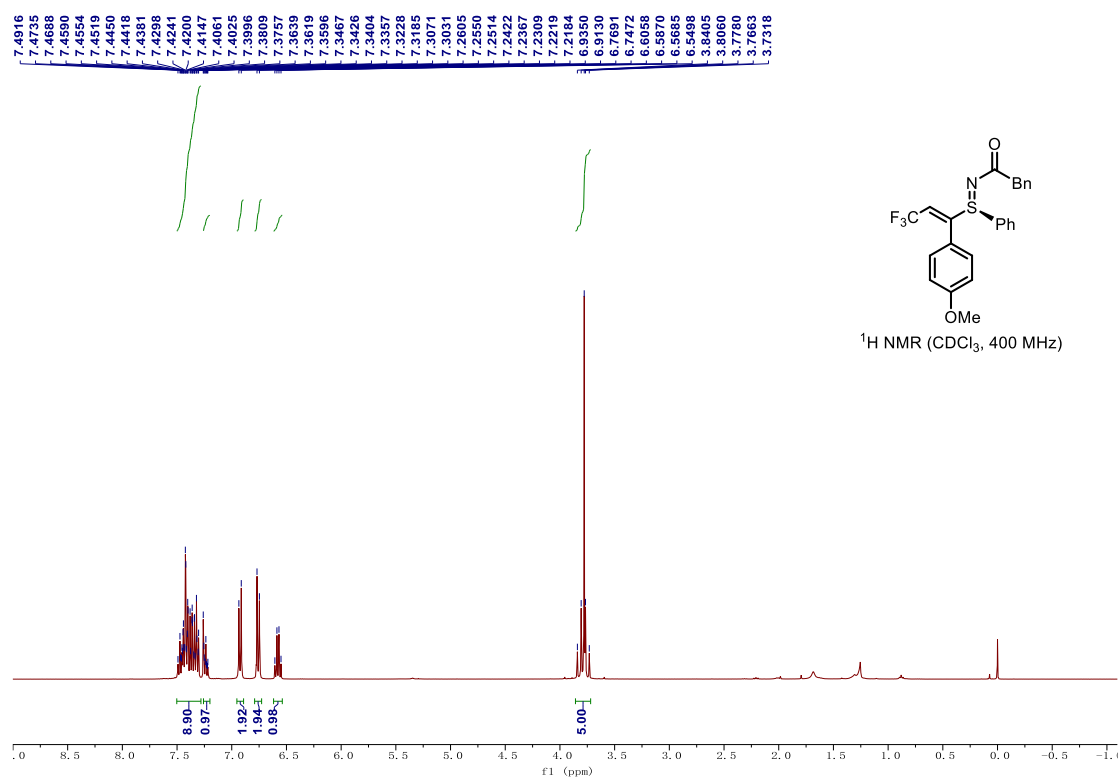

### <sup>13</sup>C NMR Spectrum of 4z

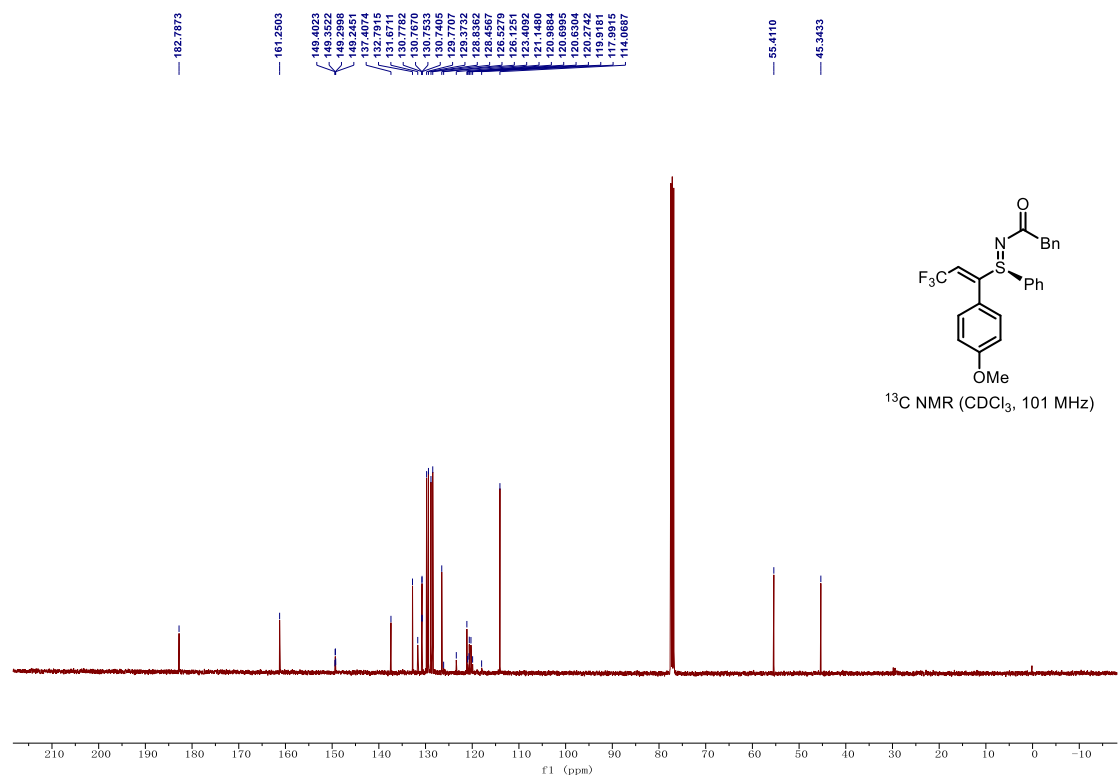

# <sup>19</sup>F NMR Spectrum of 4z

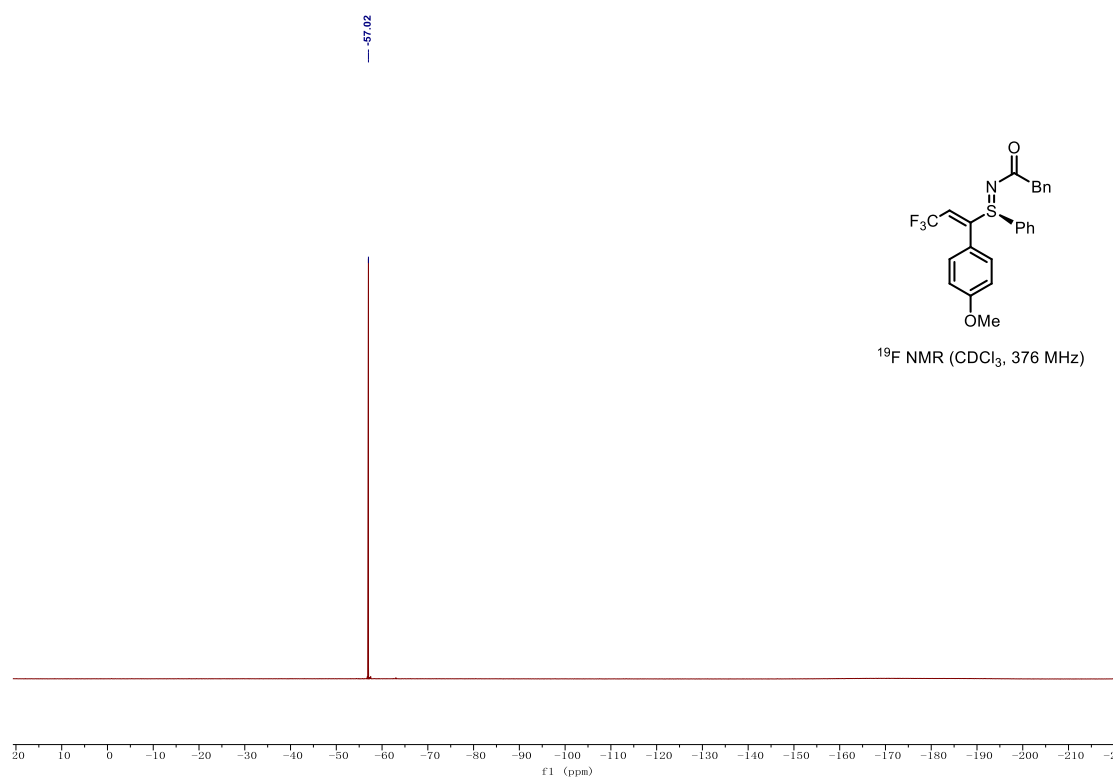

### <sup>1</sup>H NMR Spectrum of 4aa

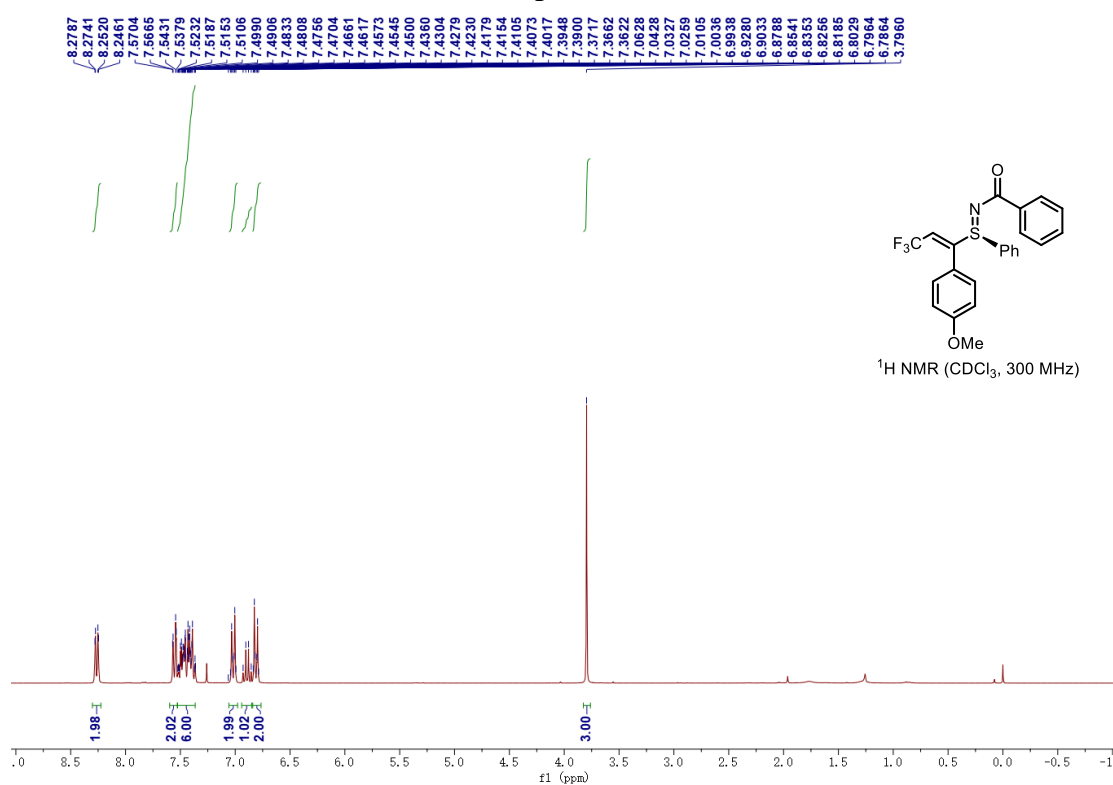

### <sup>13</sup>C NMR Spectrum of 4aa

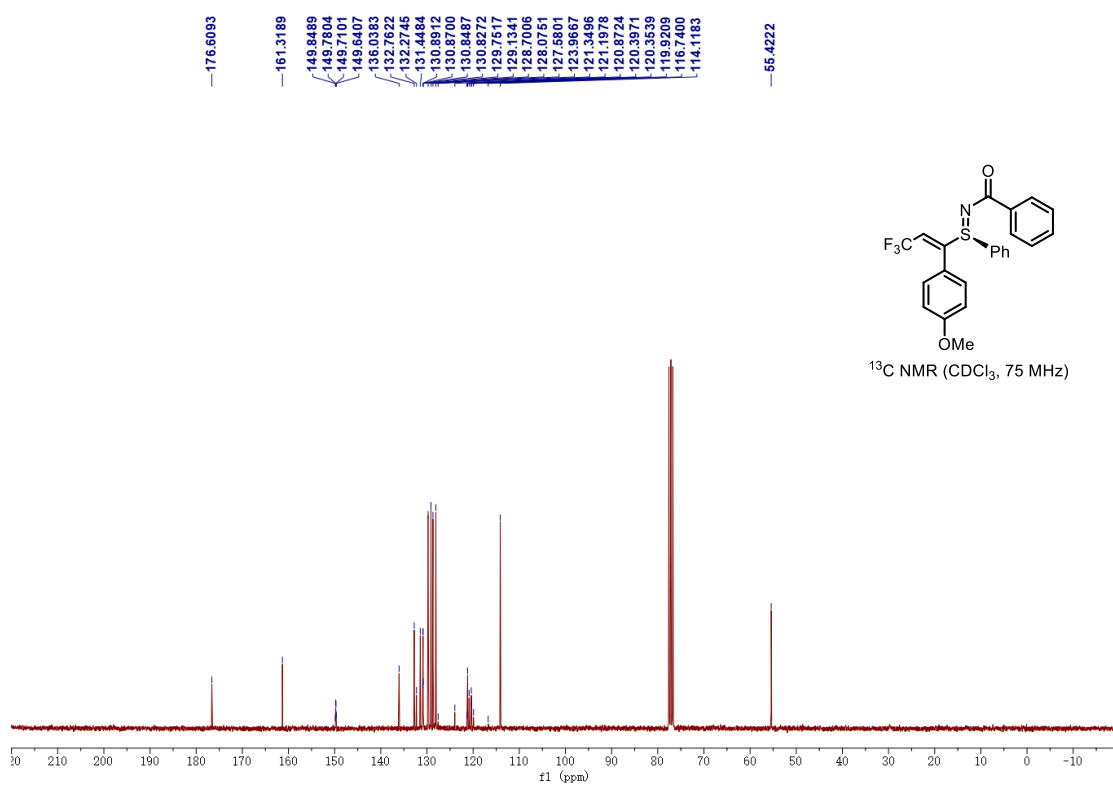

# <sup>19</sup>F NMR Spectrum of 4aa

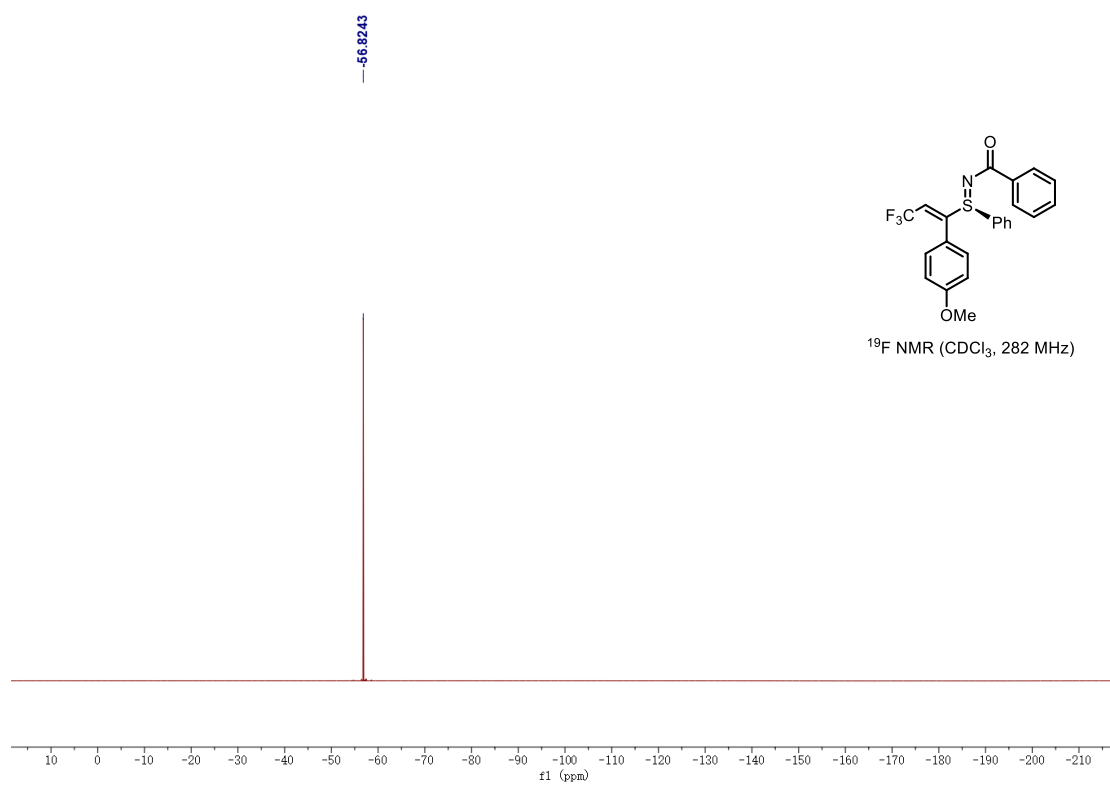

### <sup>1</sup>H NMR Spectrum of 4ab

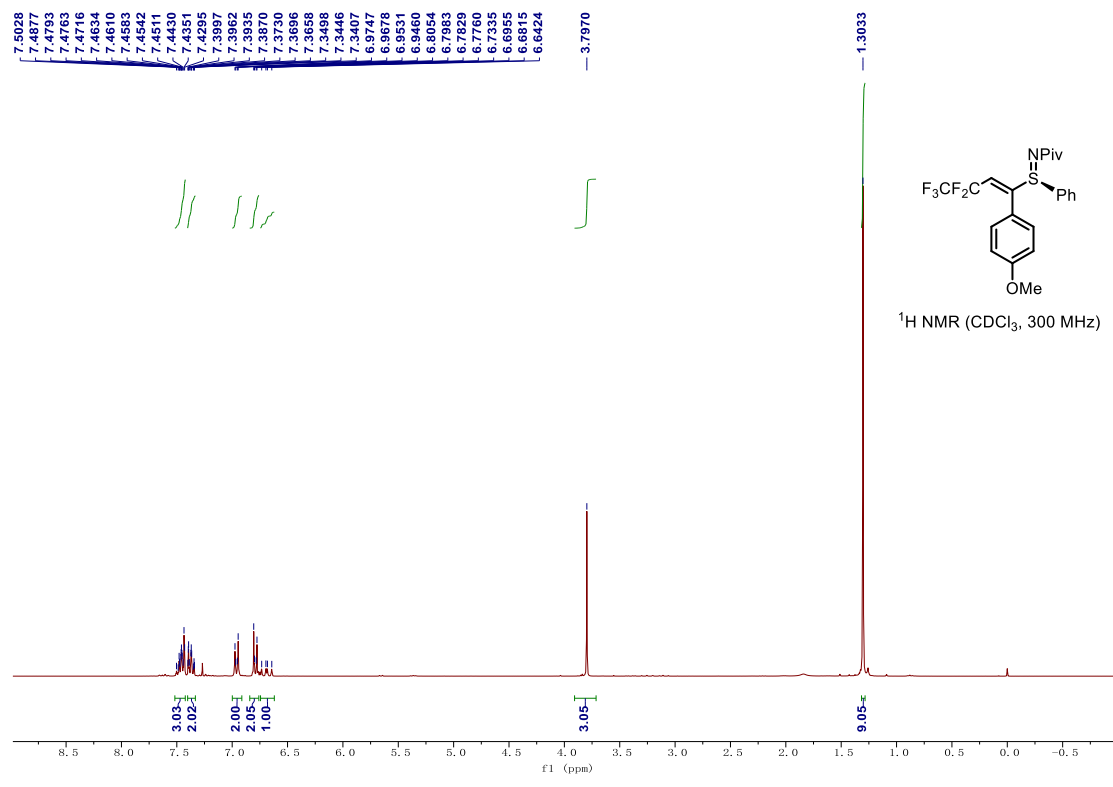

### <sup>13</sup>C NMR Spectrum of 4ab

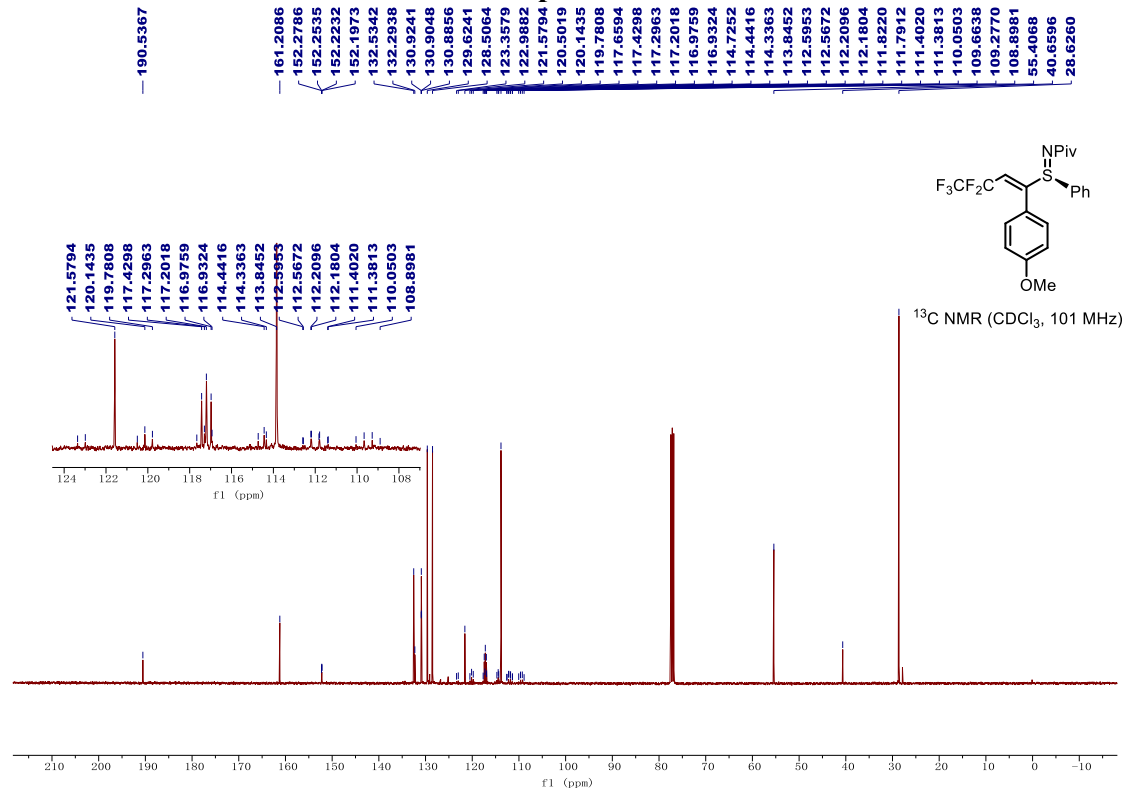

# <sup>19</sup>F NMR Spectrum of 4ab

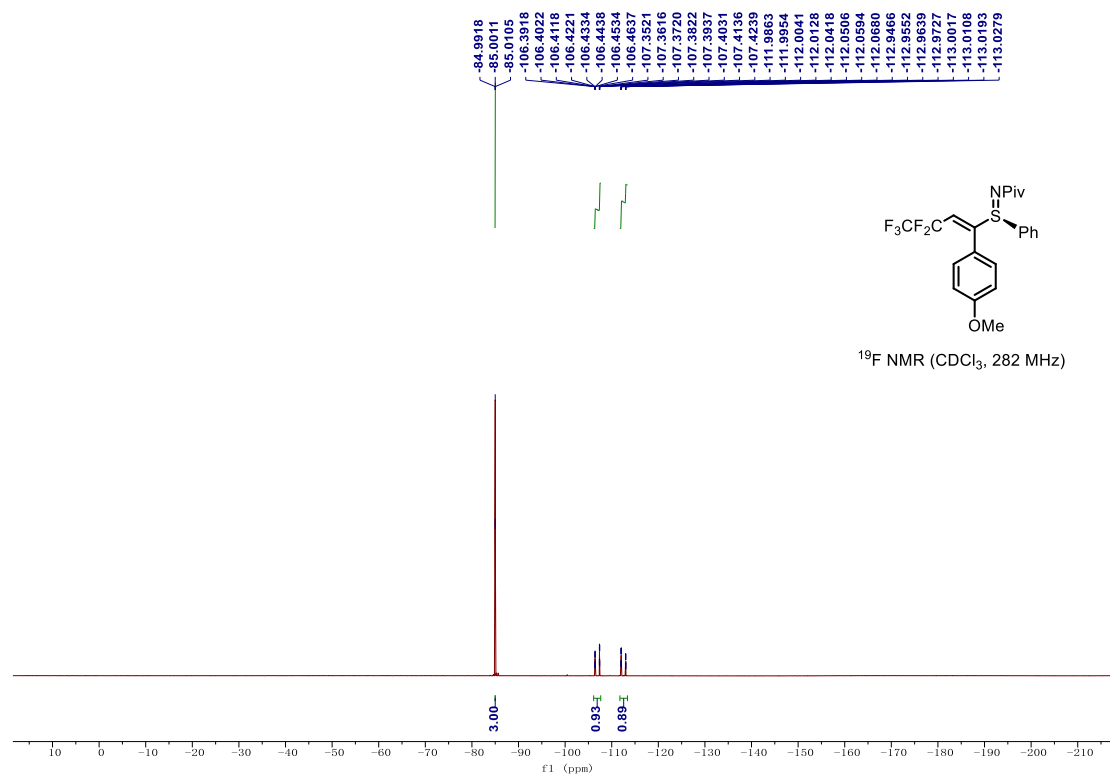

### <sup>1</sup>H NMR Spectrum of 4ac

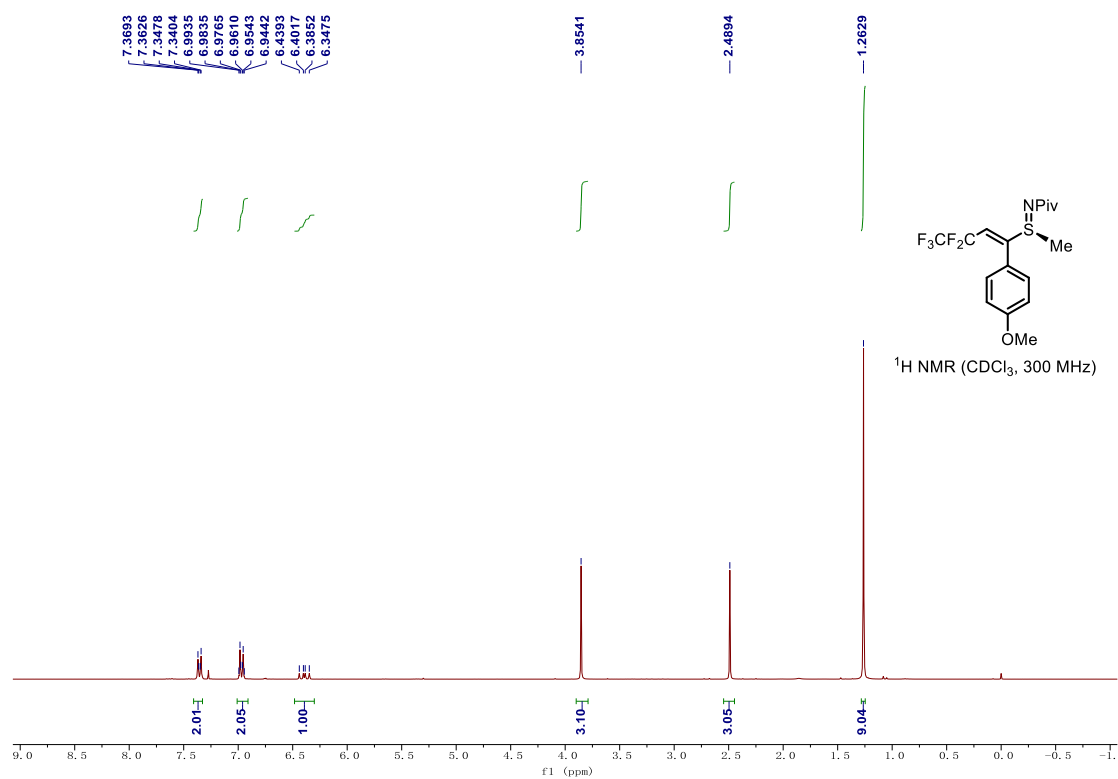

### <sup>13</sup>C NMR Spectrum of 4ac

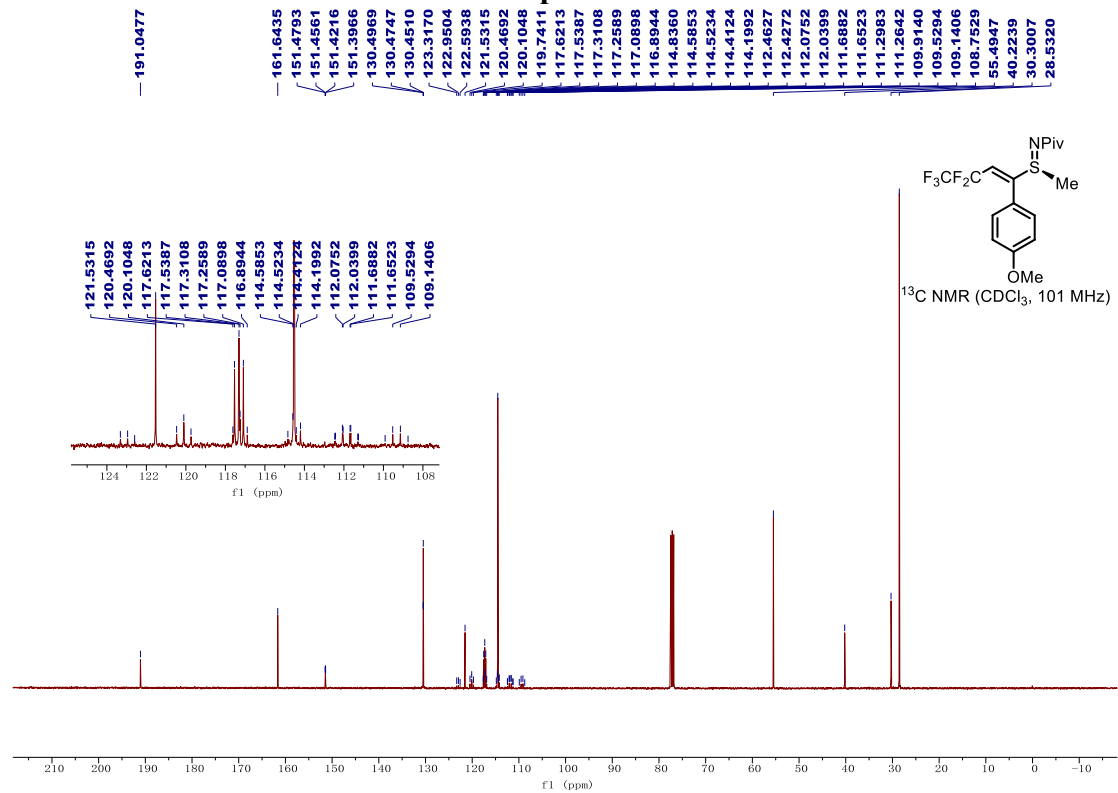

# <sup>19</sup>F NMR Spectrum of 4ac

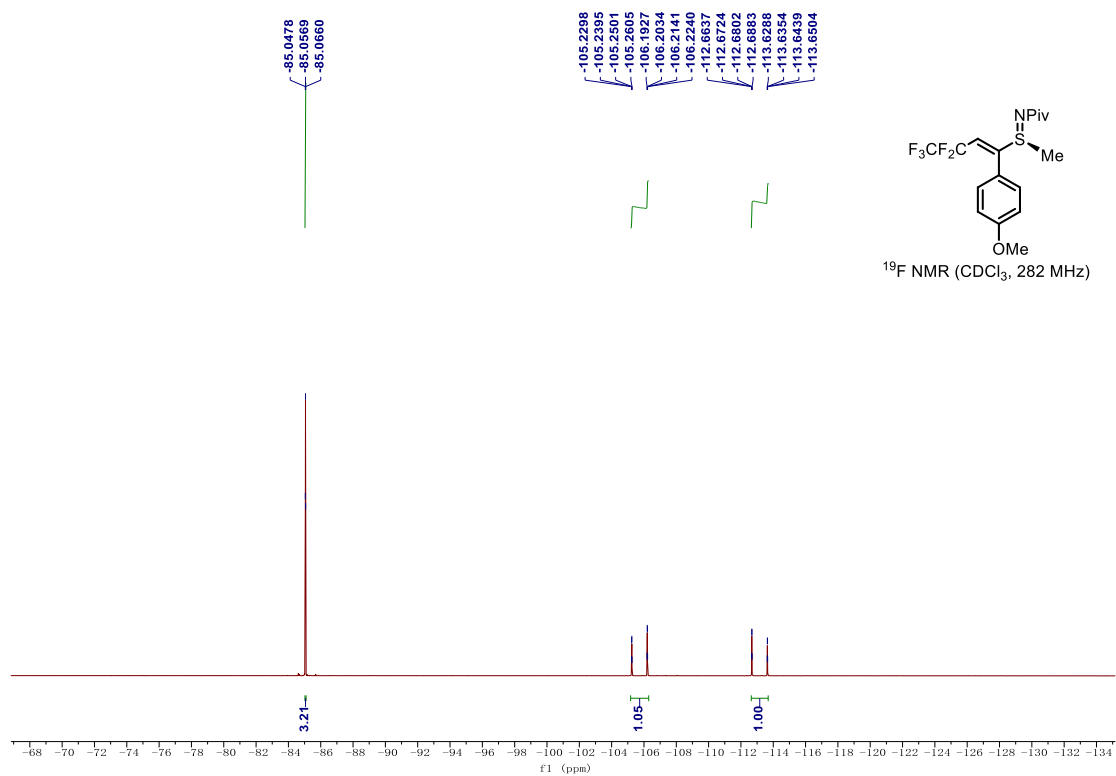

### <sup>1</sup>H NMR Spectrum of 4ad

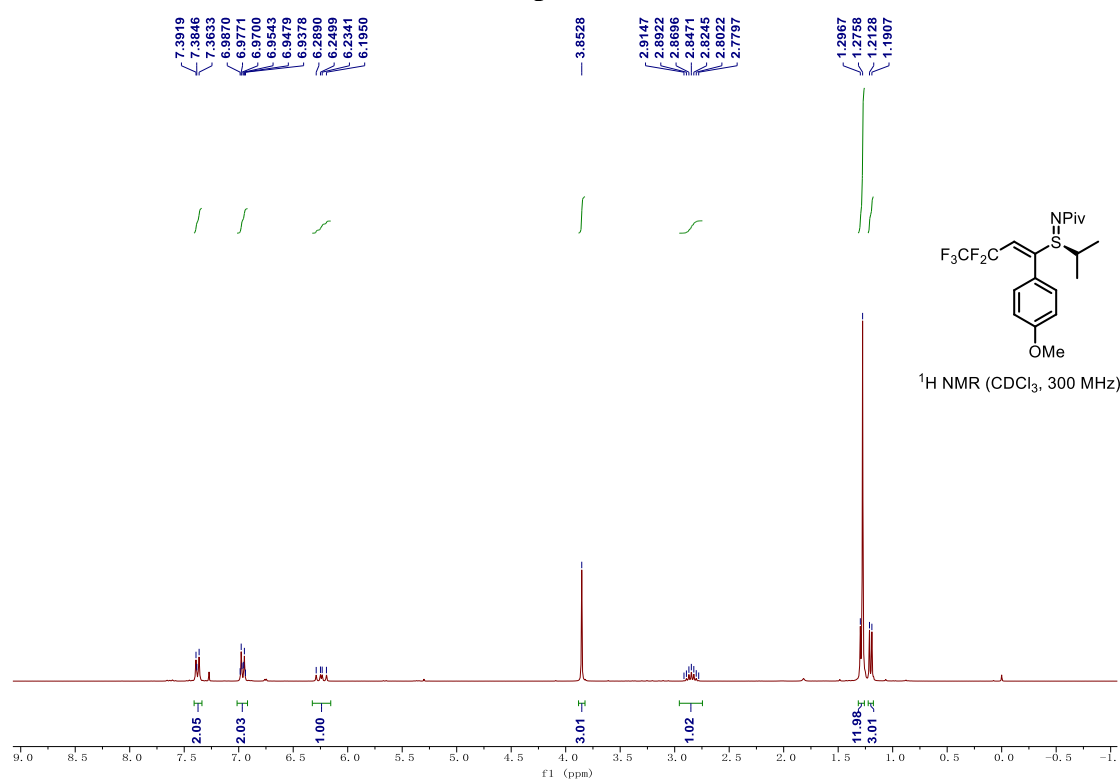

### <sup>13</sup>C NMR Spectrum of 4ad

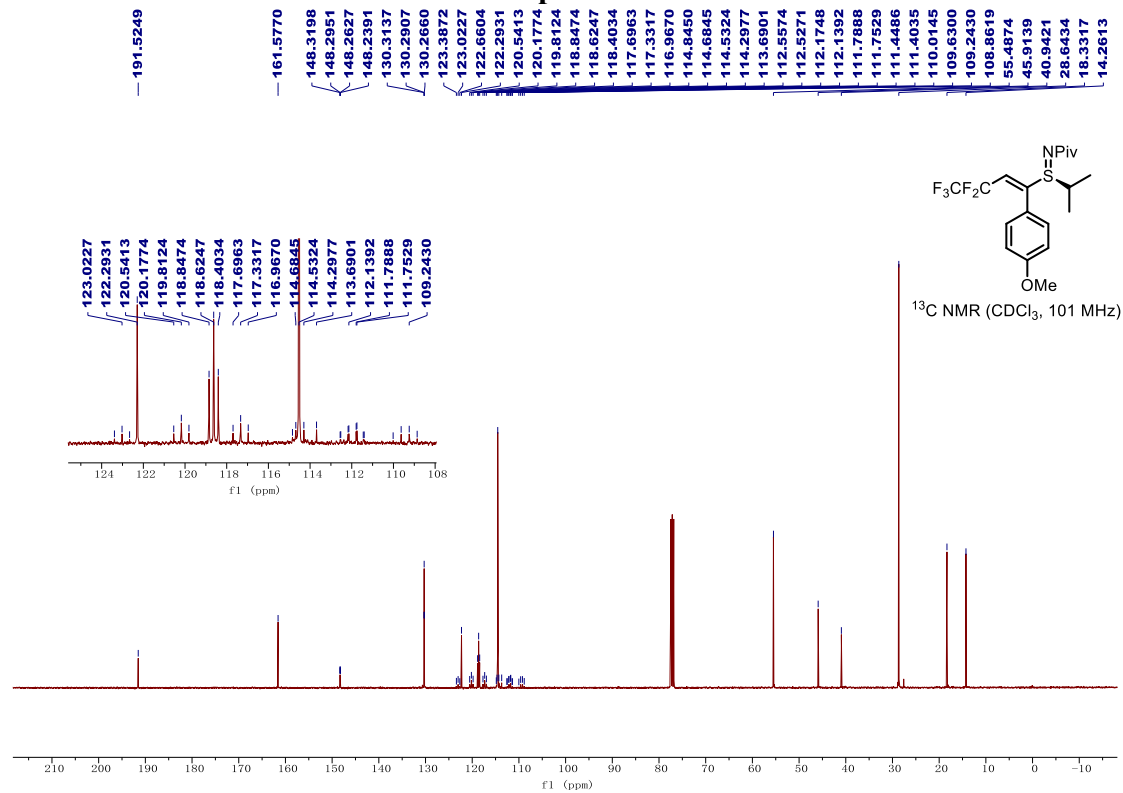

# <sup>19</sup>F NMR Spectrum of 4ad

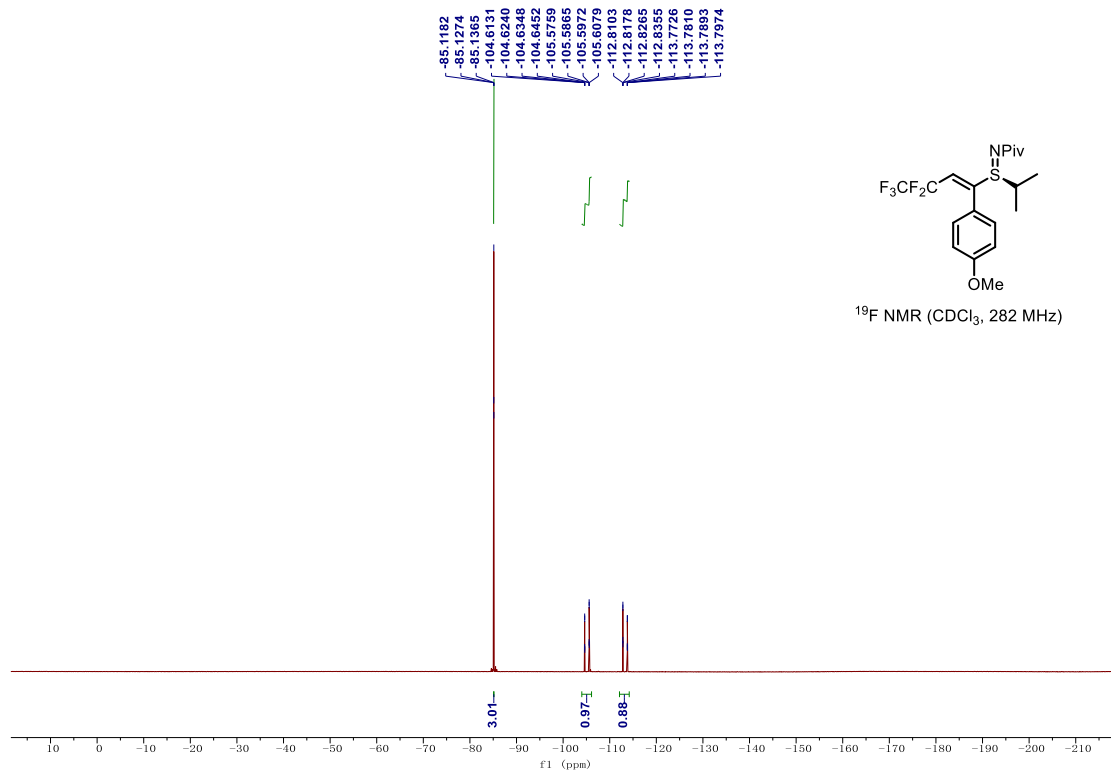

### <sup>1</sup>H NMR Spectrum of 4ae

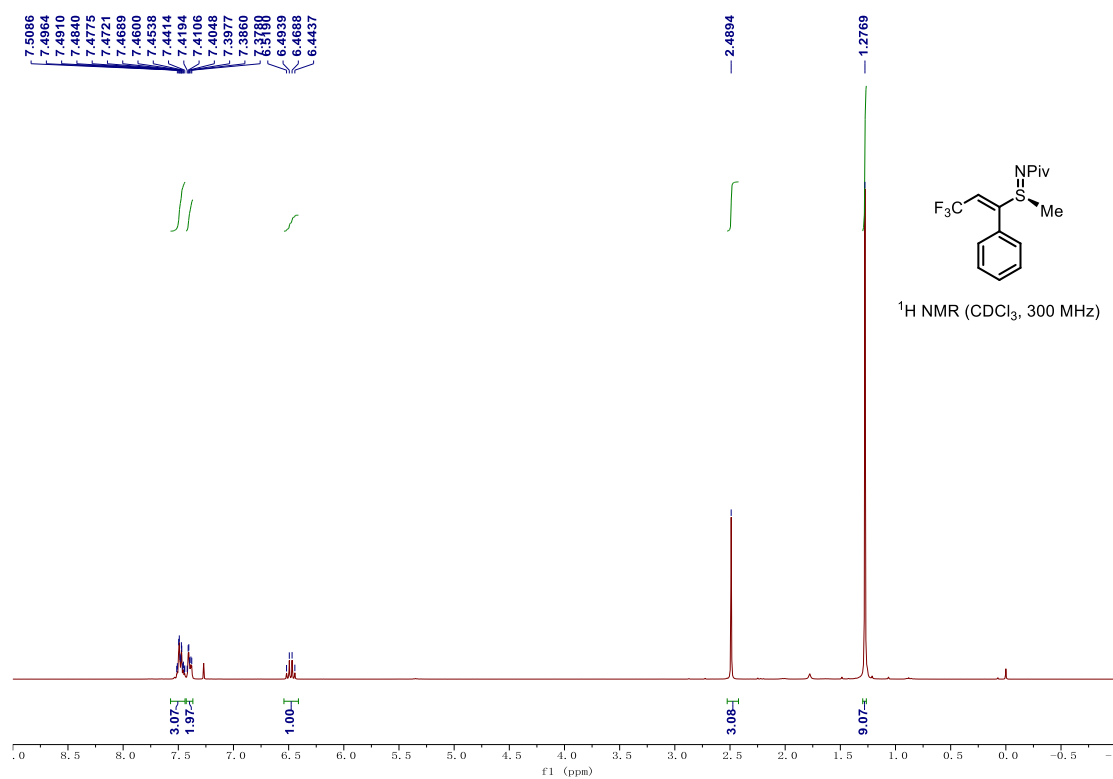

### <sup>13</sup>C NMR Spectrum of 4ae

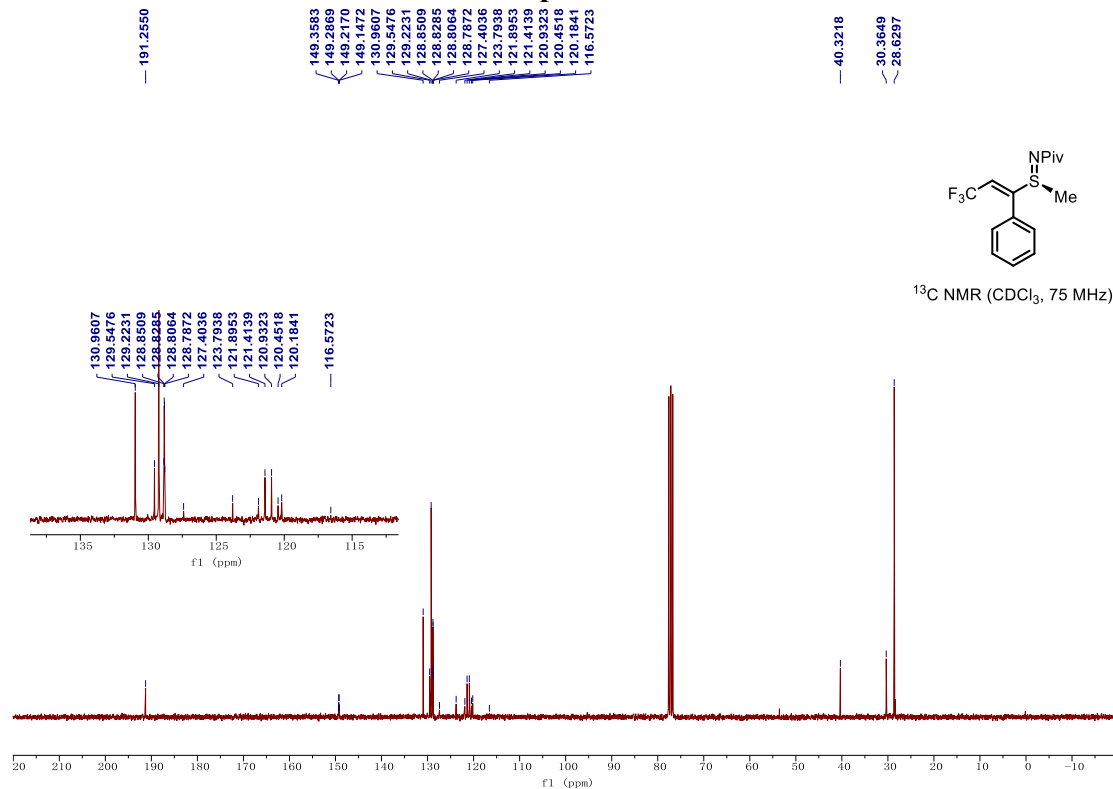

# <sup>19</sup>F NMR Spectrum of 4ae

-57.1007

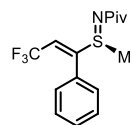

<sup>19</sup>F NMR (CDCl<sub>3</sub>, 282 MHz)

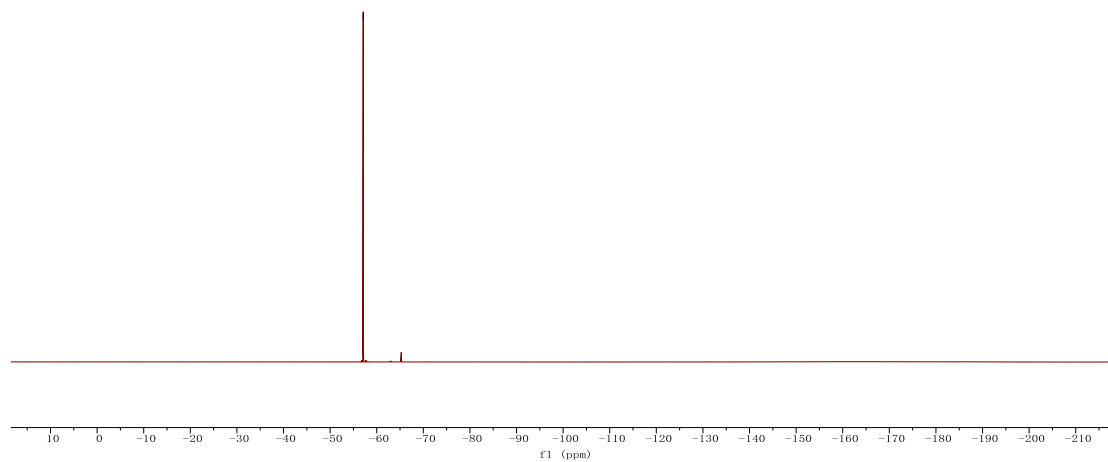

# <sup>1</sup>H NMR Spectrum of 4af

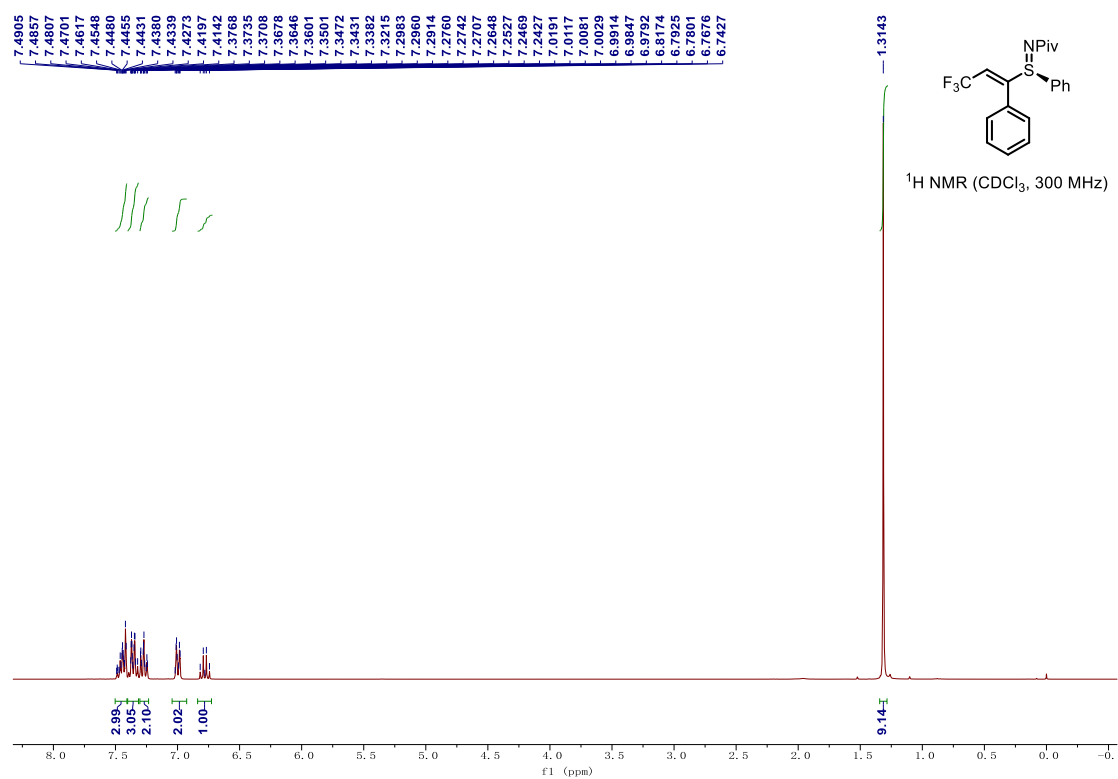

# <sup>13</sup>C NMR Spectrum of 4af

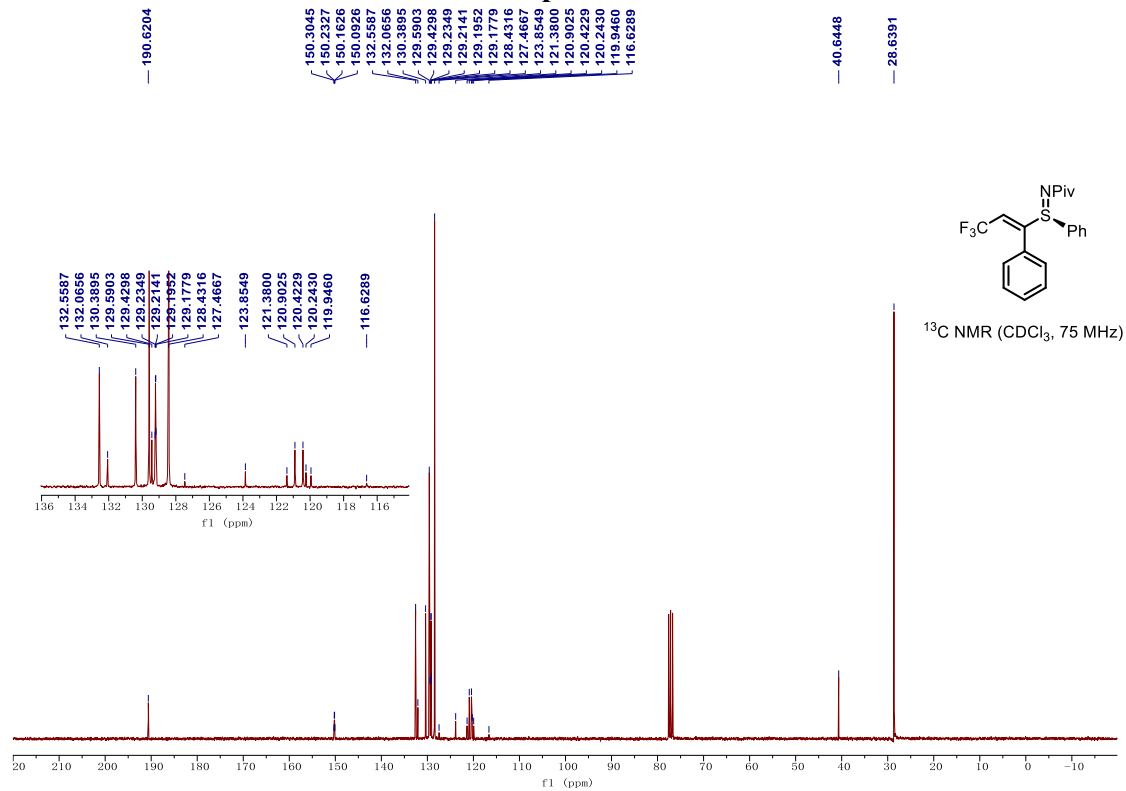

# <sup>19</sup>F NMR Spectrum of 4af

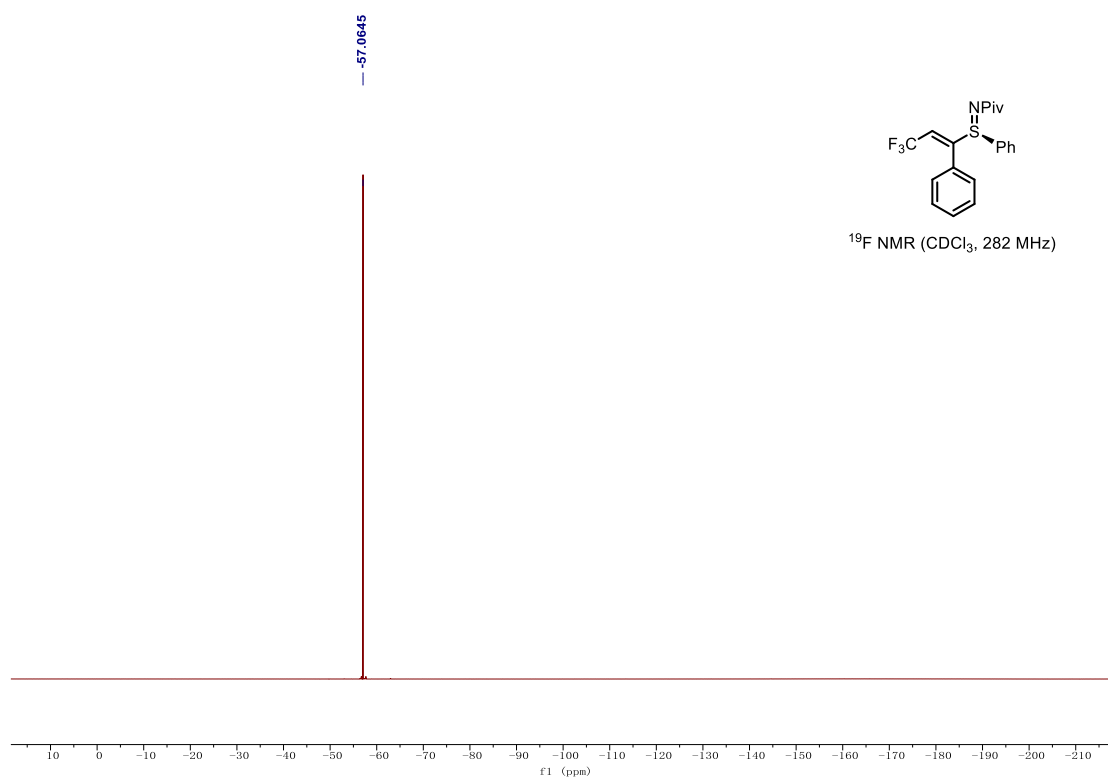

### <sup>1</sup>H NMR Spectrum of 4ag

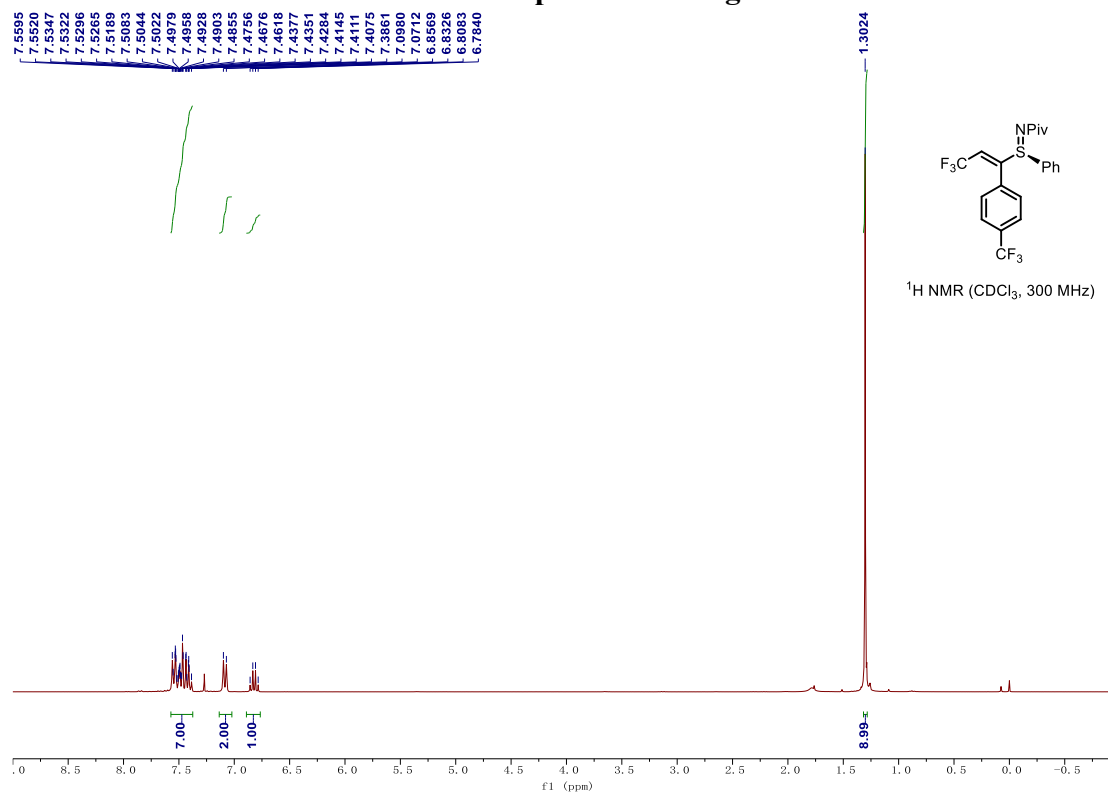

### <sup>13</sup>C NMR Spectrum of 4ag

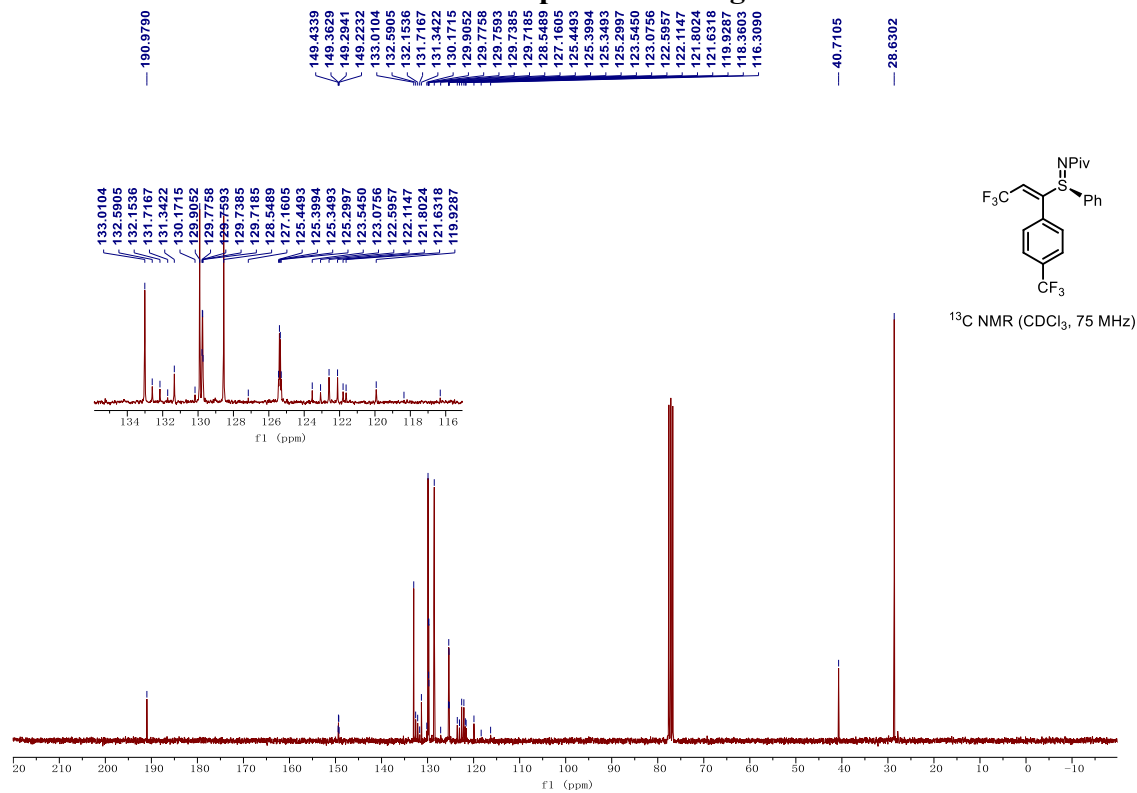

# <sup>19</sup>F NMR Spectrum of 4ag

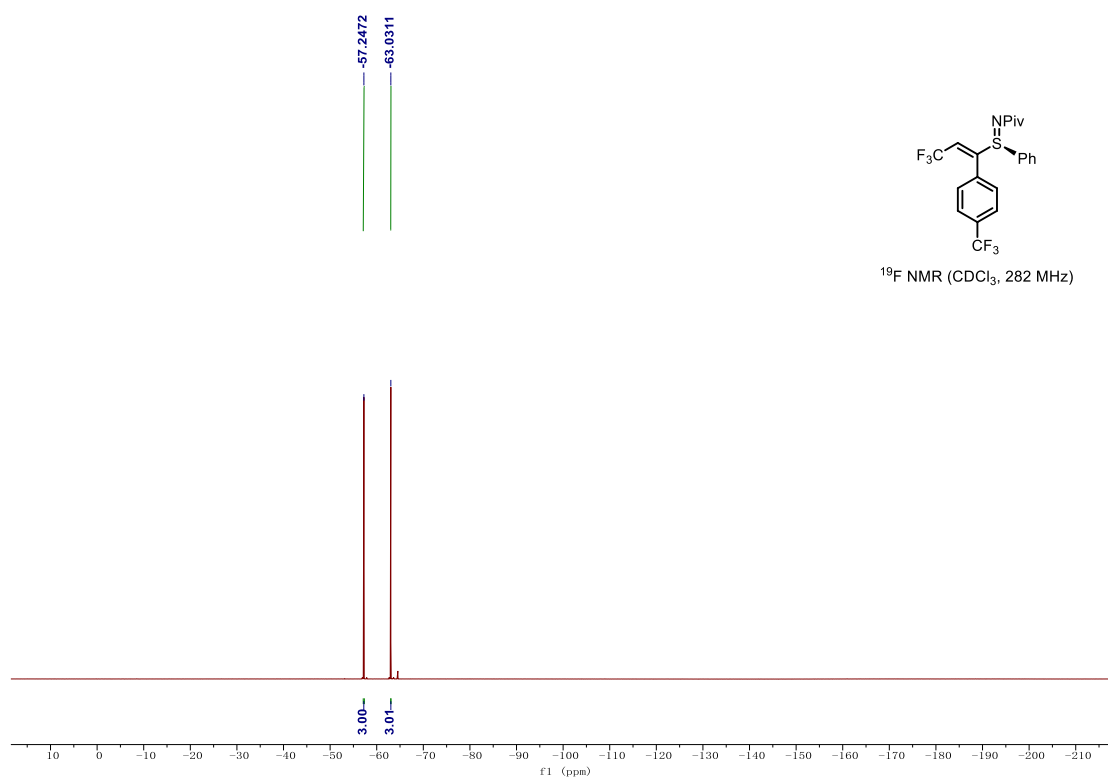

### <sup>1</sup>H NMR Spectrum of 4ah

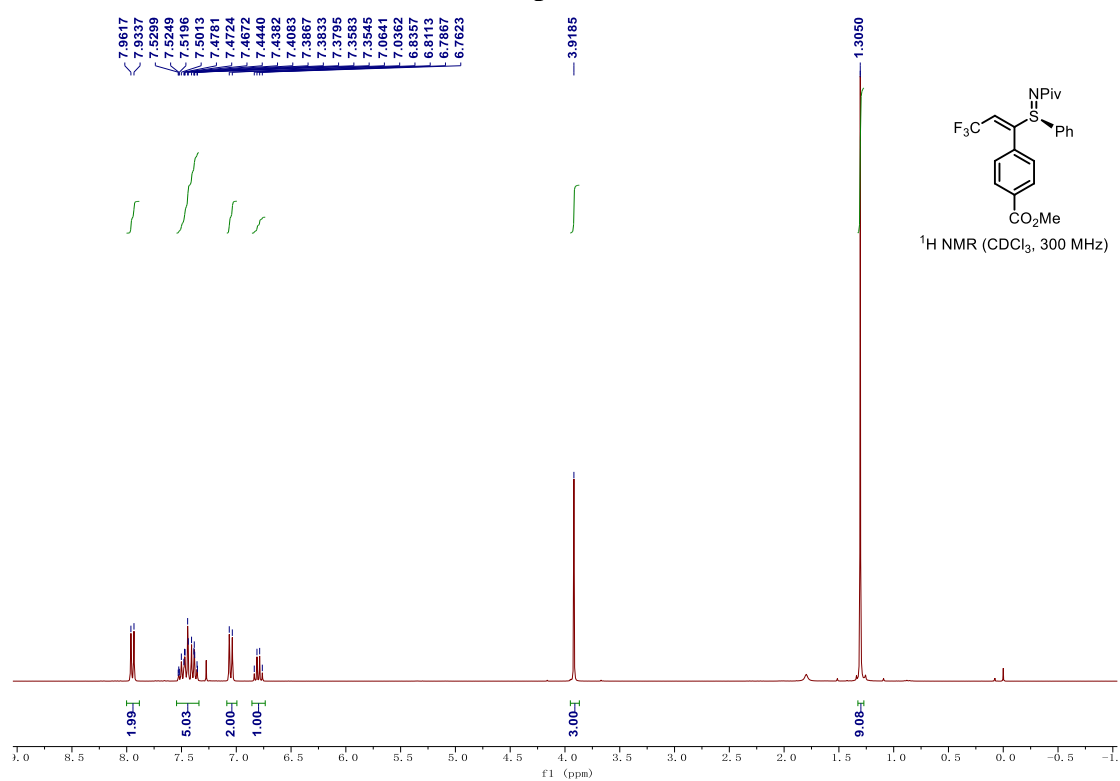

### <sup>13</sup>C NMR Spectrum of 4ah

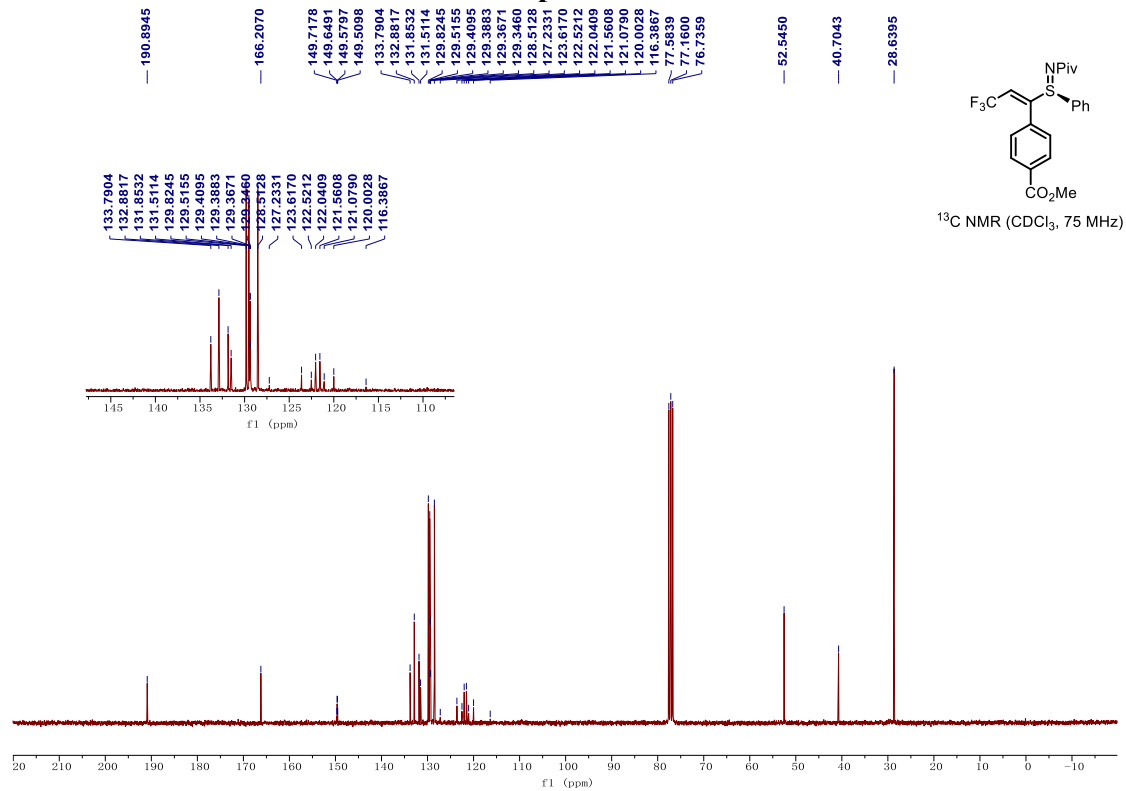

# <sup>19</sup>F NMR Spectrum of 4ah

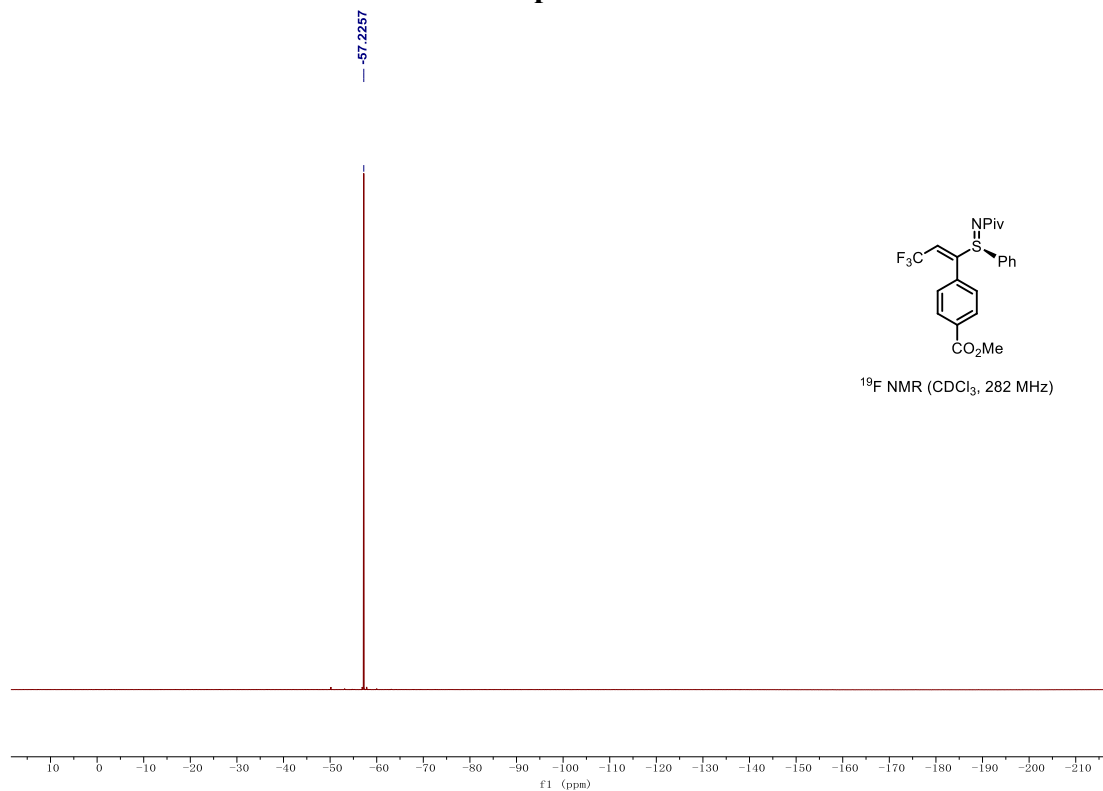

### <sup>1</sup>H NMR Spectrum of 4ai

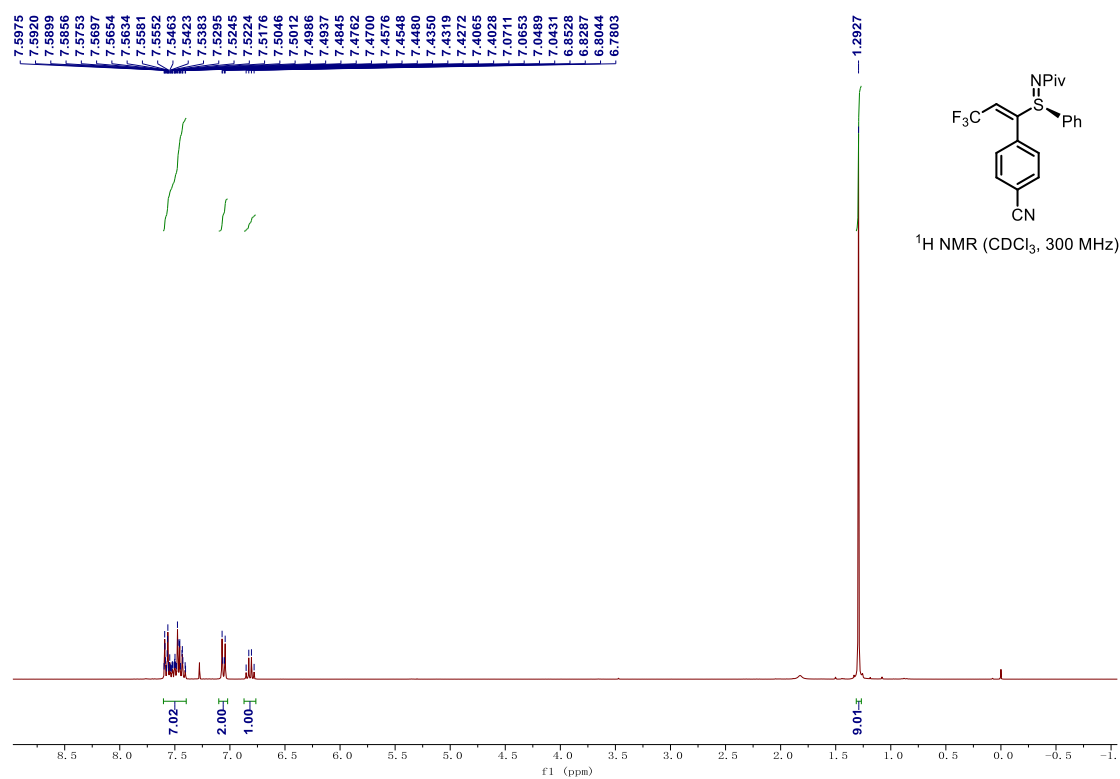

### <sup>13</sup>C NMR Spectrum of 4ai

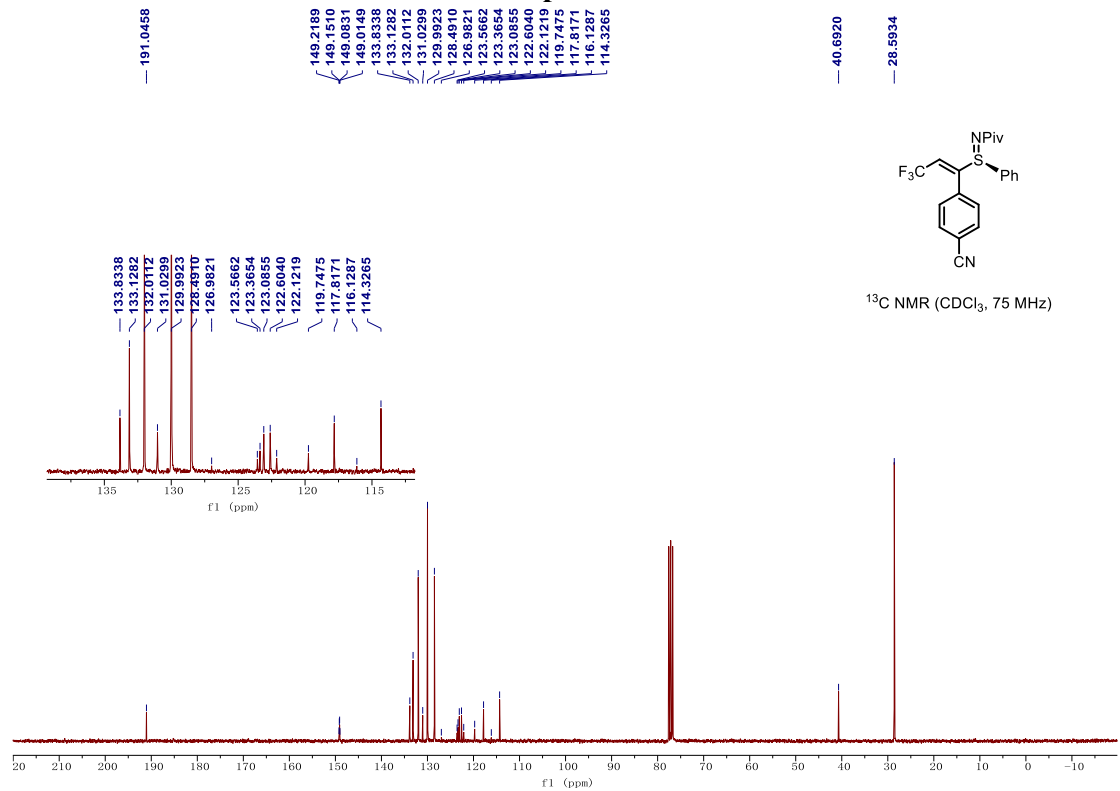

# <sup>19</sup>F NMR Spectrum of 4ai

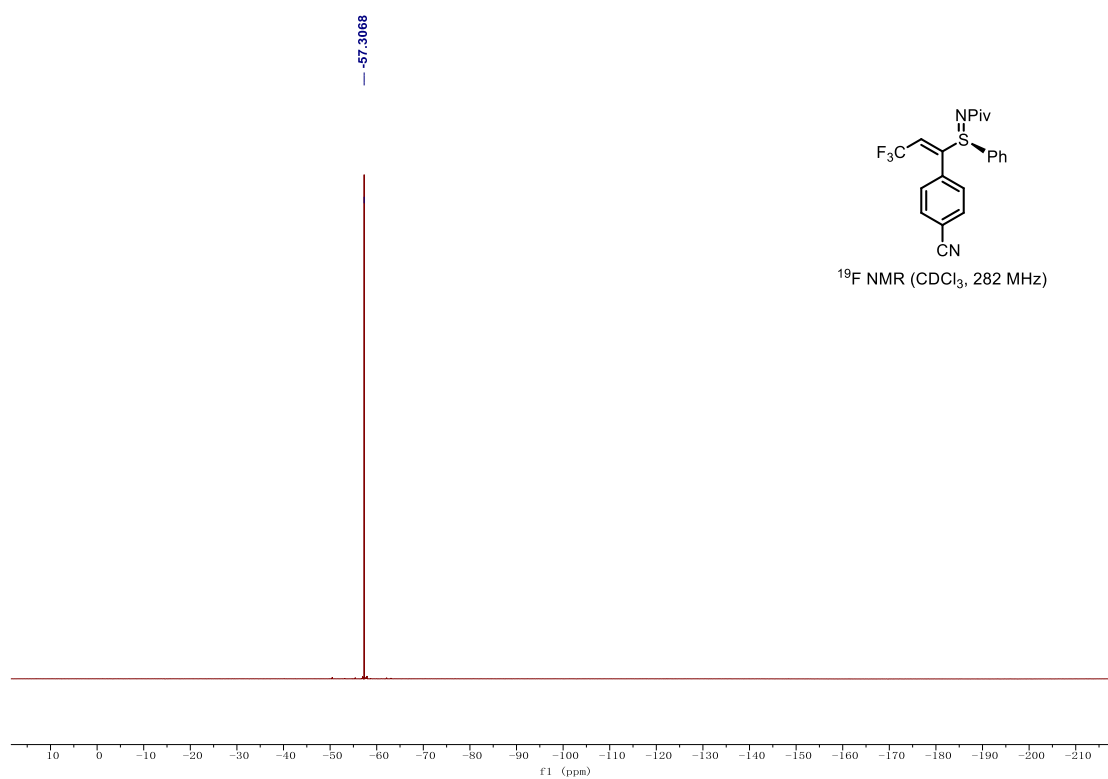

### <sup>1</sup>H NMR Spectrum of 4aj

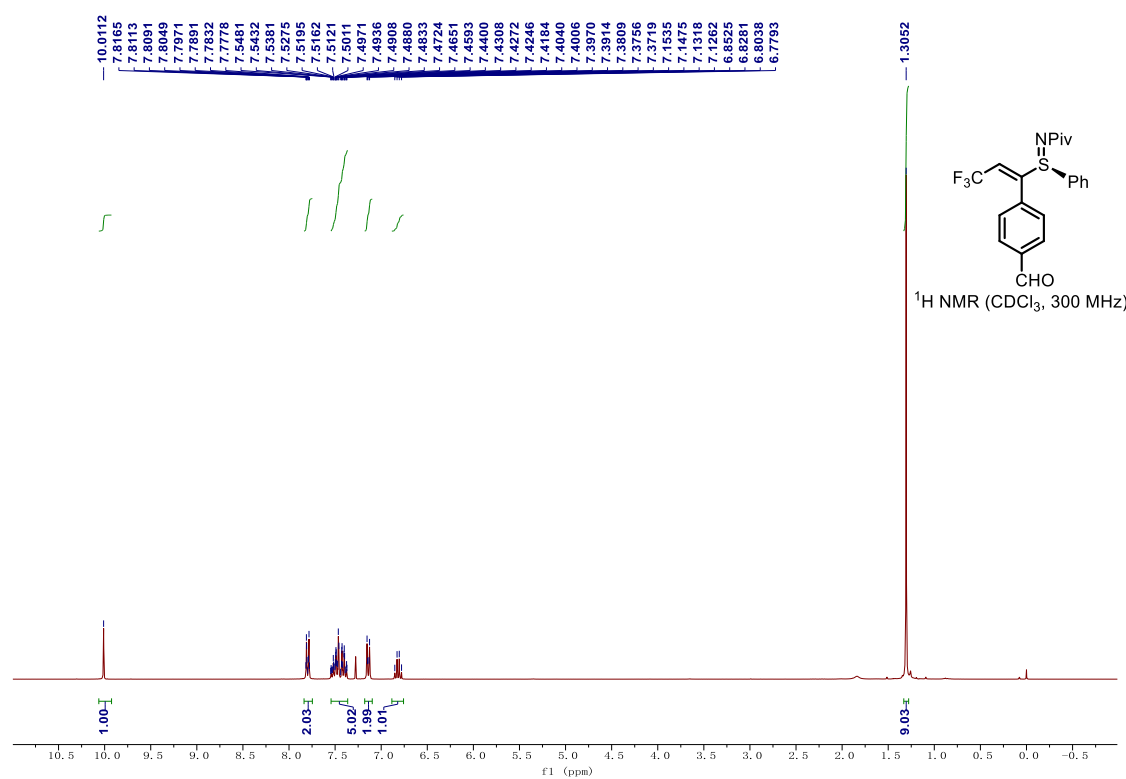

### <sup>13</sup>C NMR Spectrum of 4aj

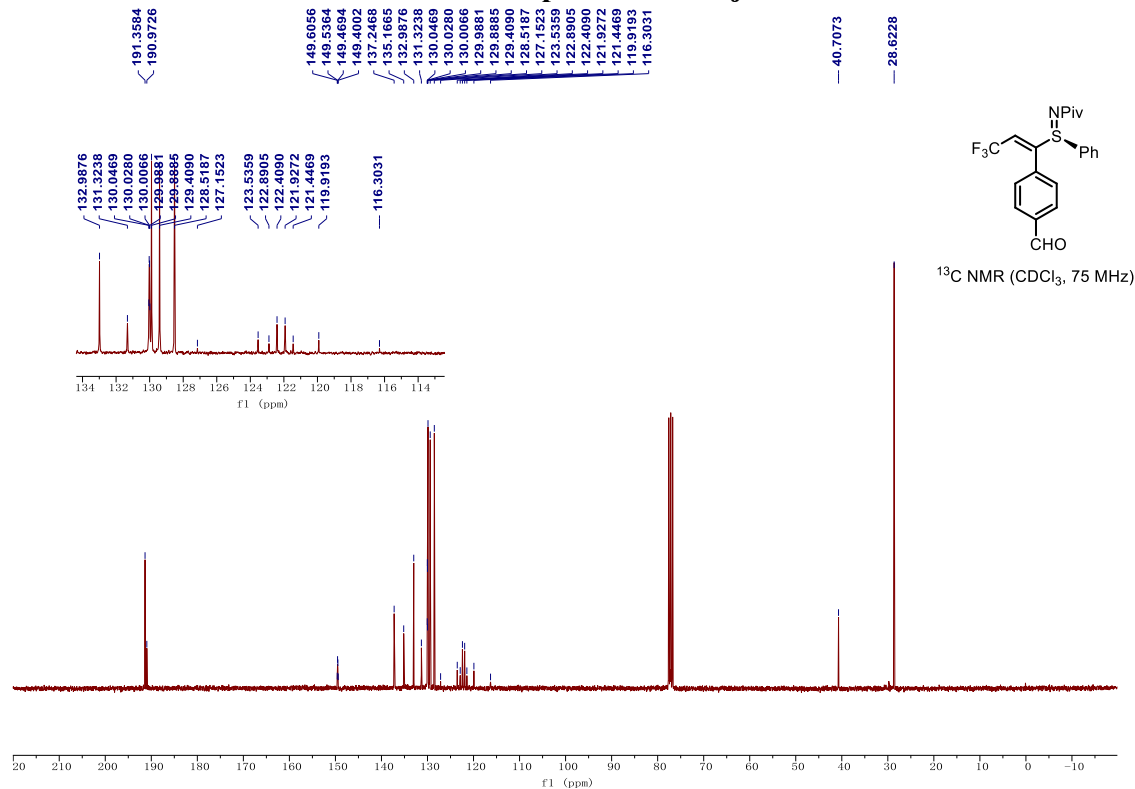

# $^{19}\text{F}$ NMR Spectrum of 4aj

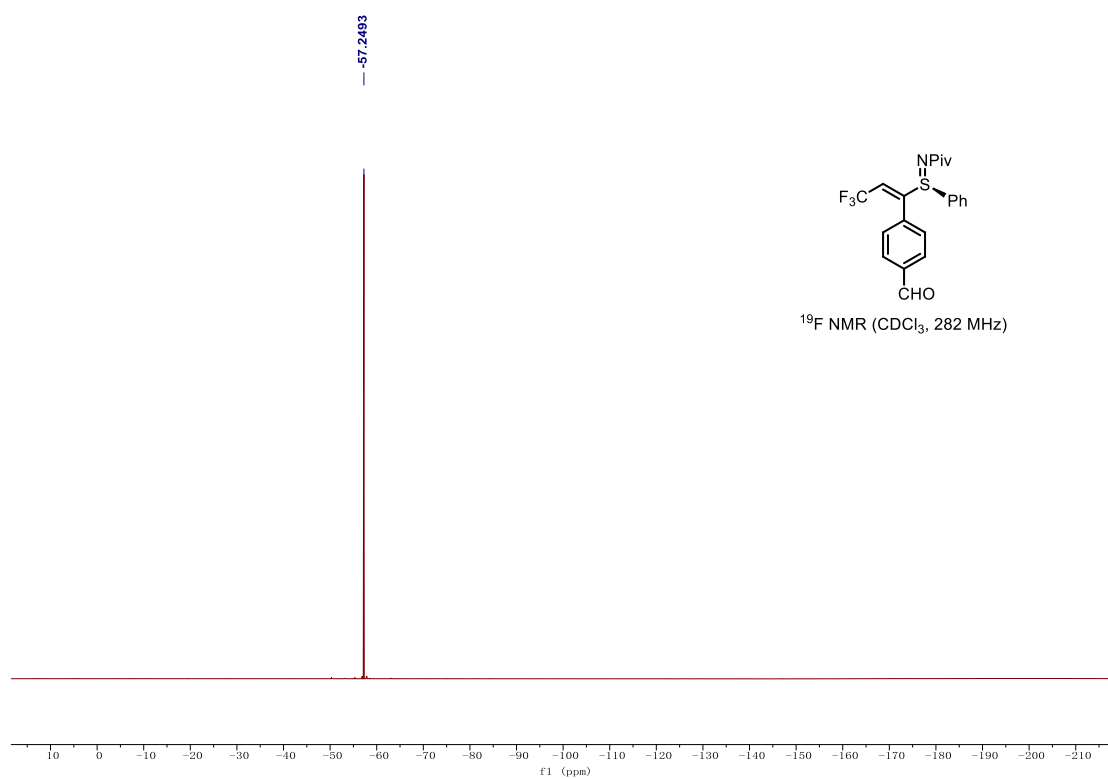

### <sup>1</sup>H NMR Spectrum of 4ak

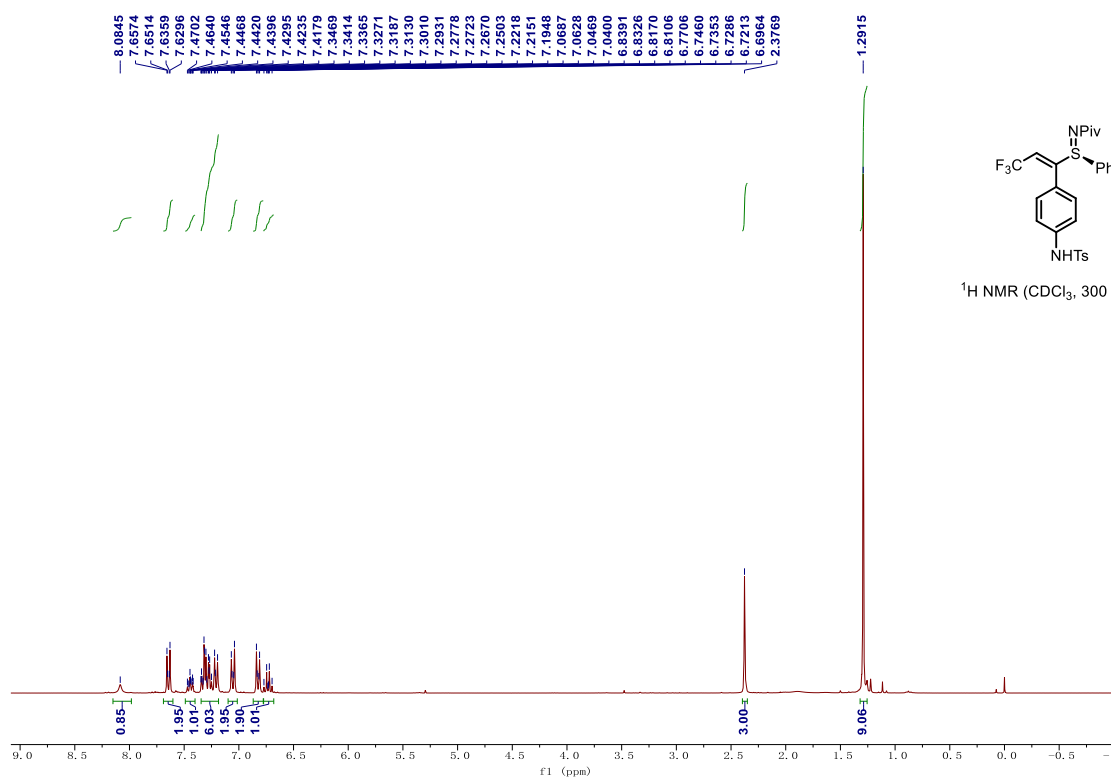

### <sup>13</sup>C NMR Spectrum of 4ak

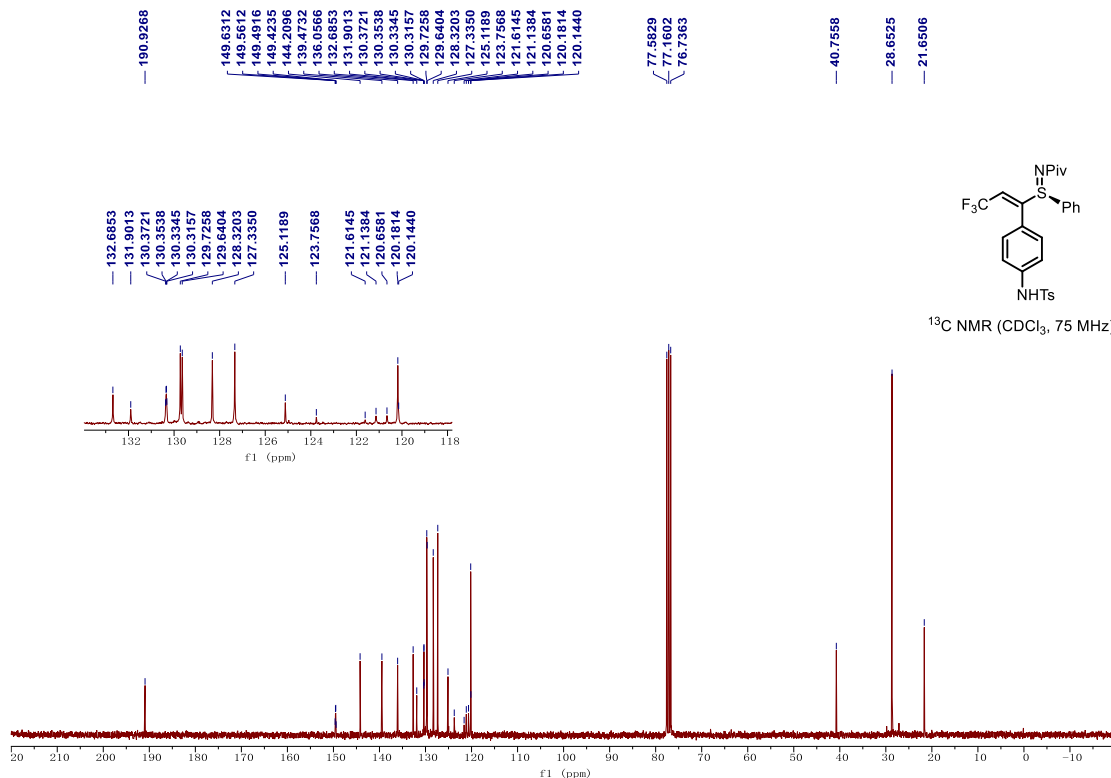

# <sup>19</sup>F NMR Spectrum of 4ak

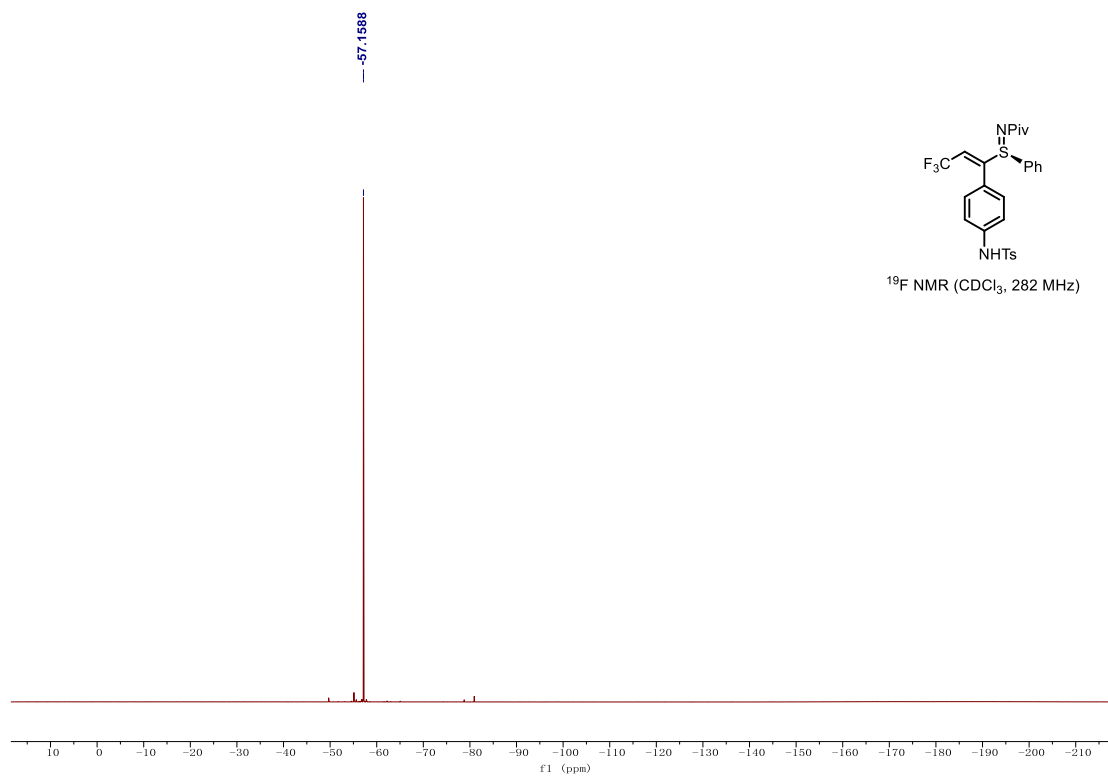

### <sup>1</sup>H NMR Spectrum of 4al

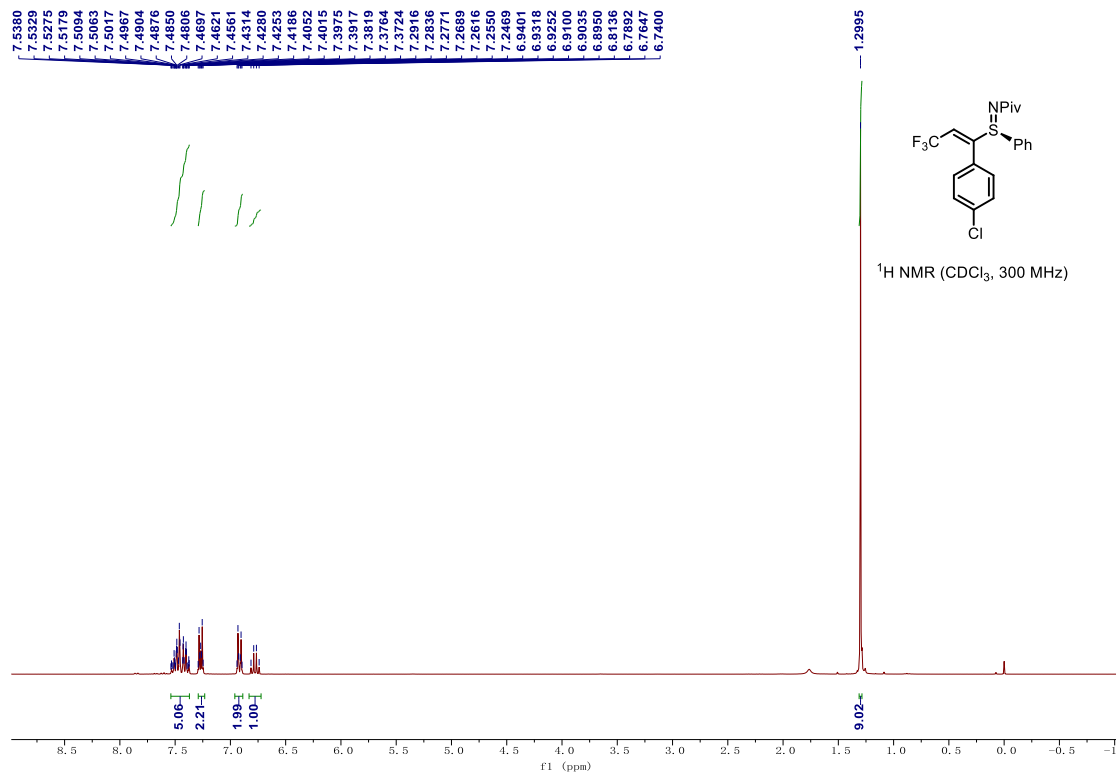

### <sup>13</sup>C NMR Spectrum of 4al

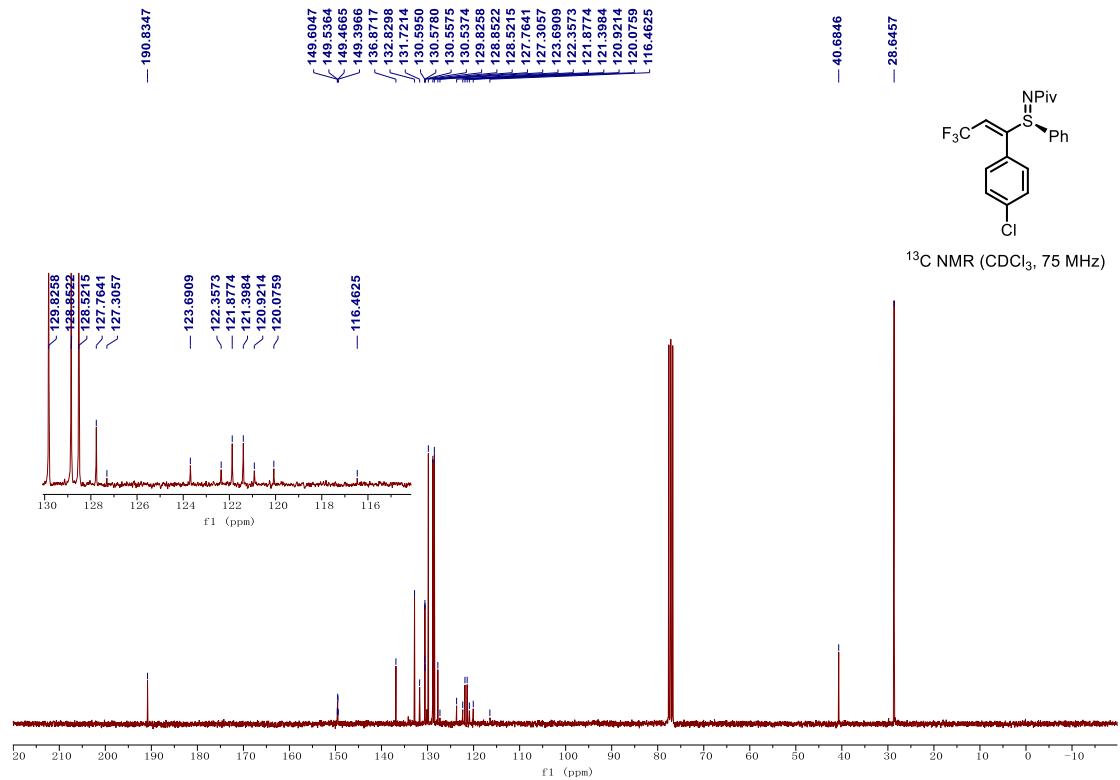

# <sup>19</sup>F NMR Spectrum of 4al

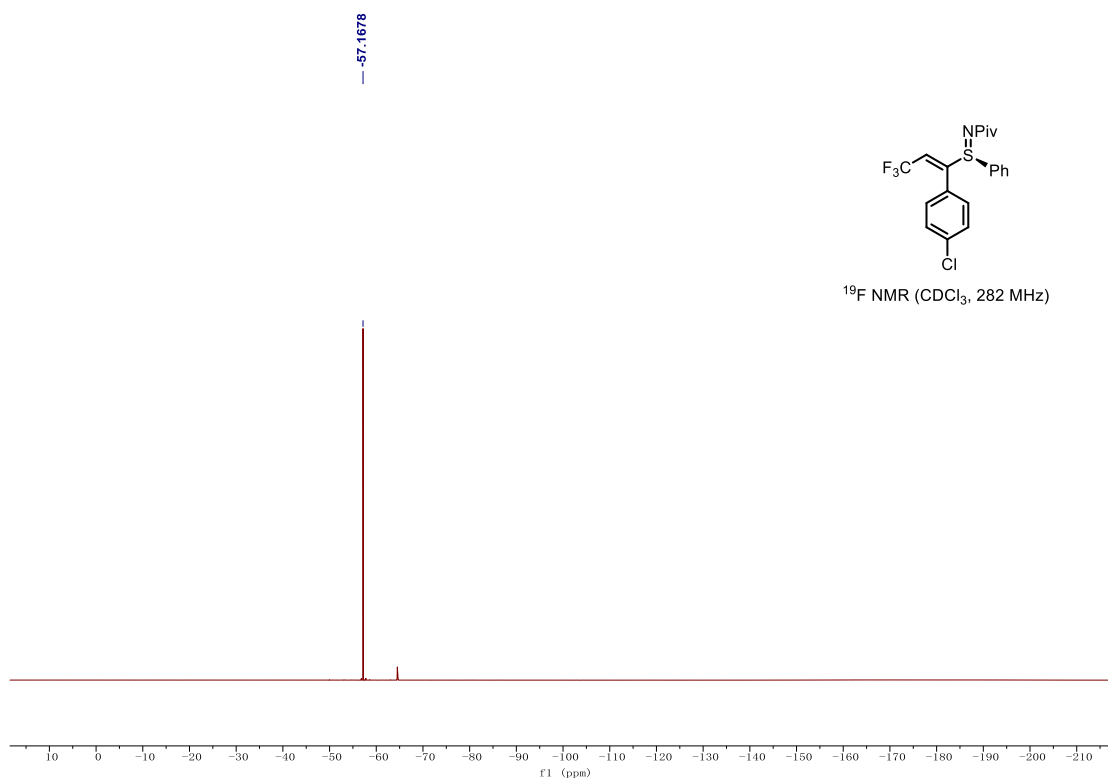

### <sup>1</sup>H NMR Spectrum of 4am

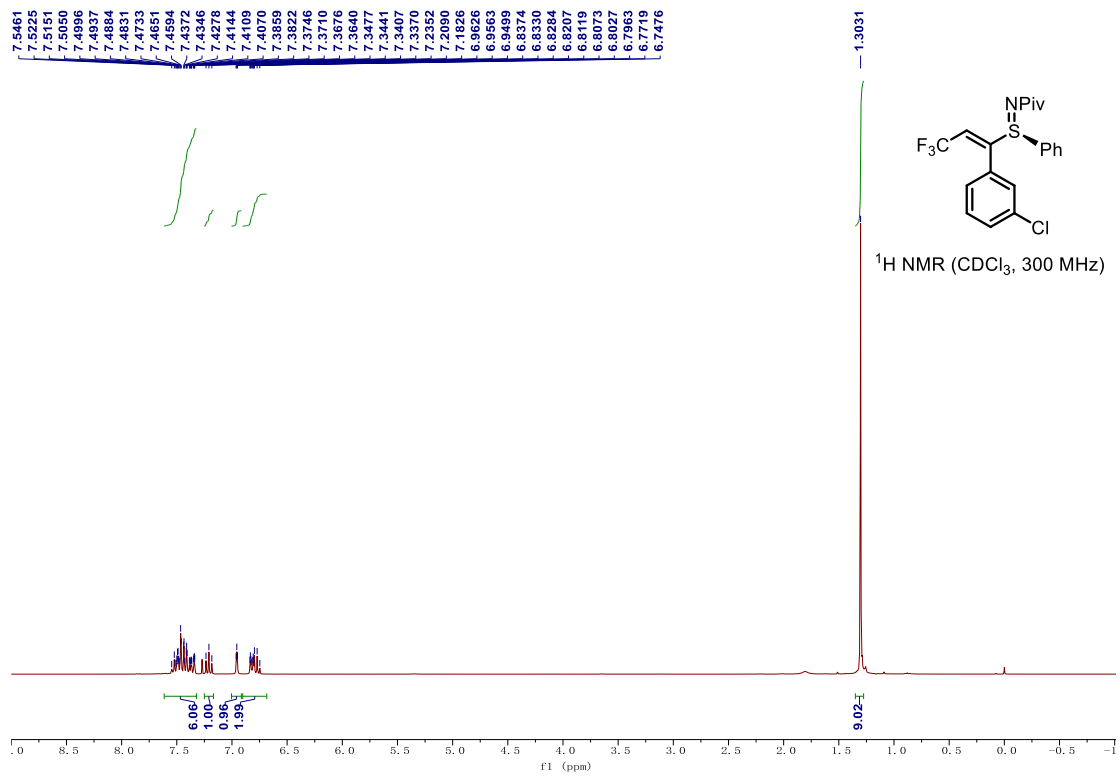

### <sup>13</sup>C NMR Spectrum of 4am

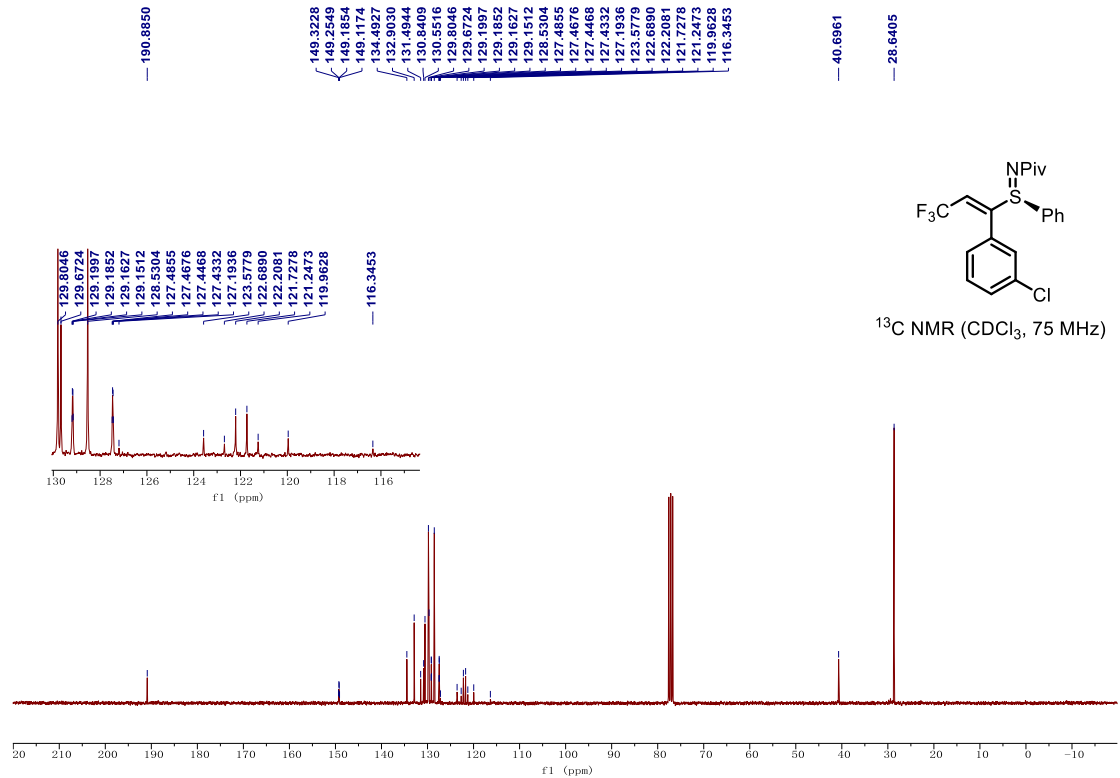

# <sup>19</sup>F NMR Spectrum of 4am

-57.2750

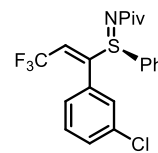

<sup>19</sup>F NMR (CDCl<sub>3</sub>, 282 MHz)

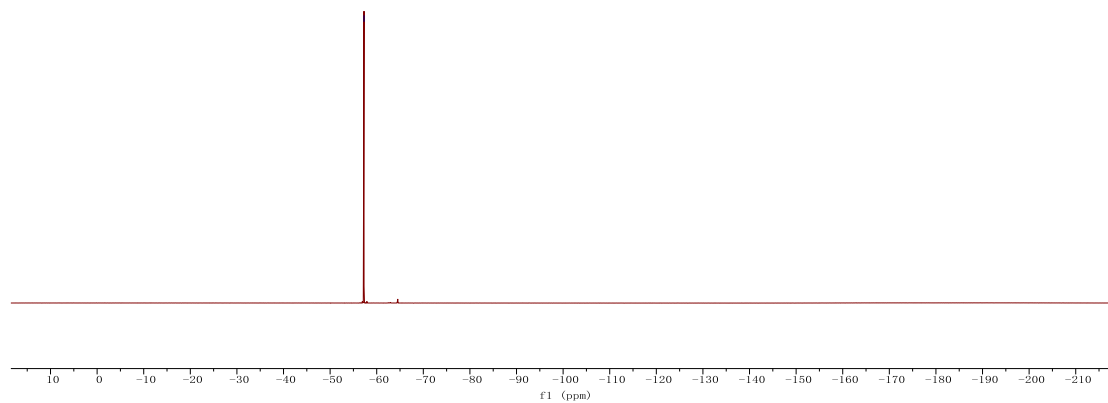

### <sup>1</sup>H NMR Spectrum of 4an

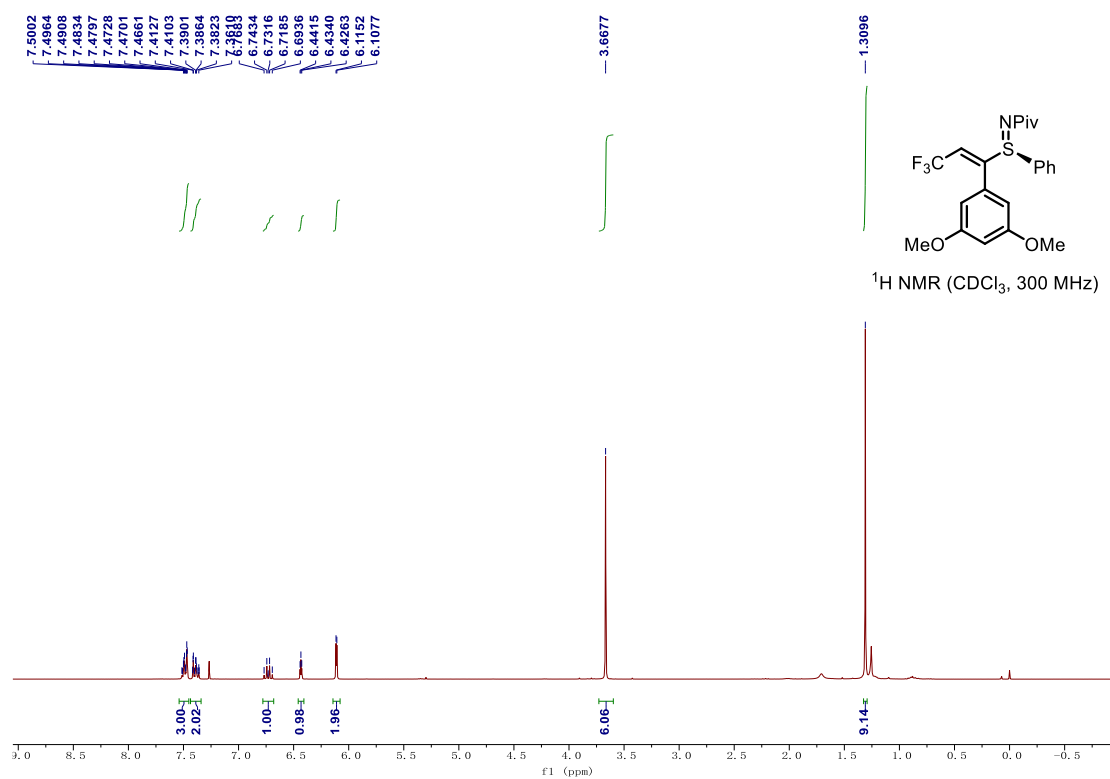

### <sup>13</sup>C NMR Spectrum of 4an

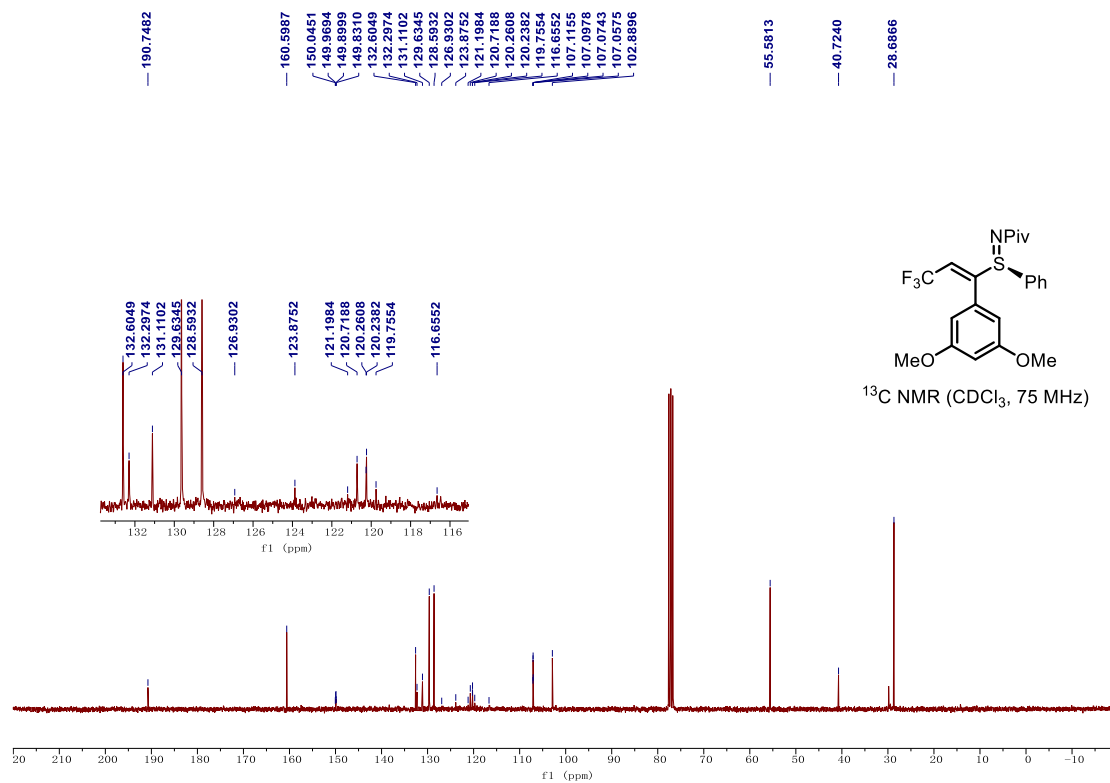

# <sup>19</sup>F NMR Spectrum of 4an

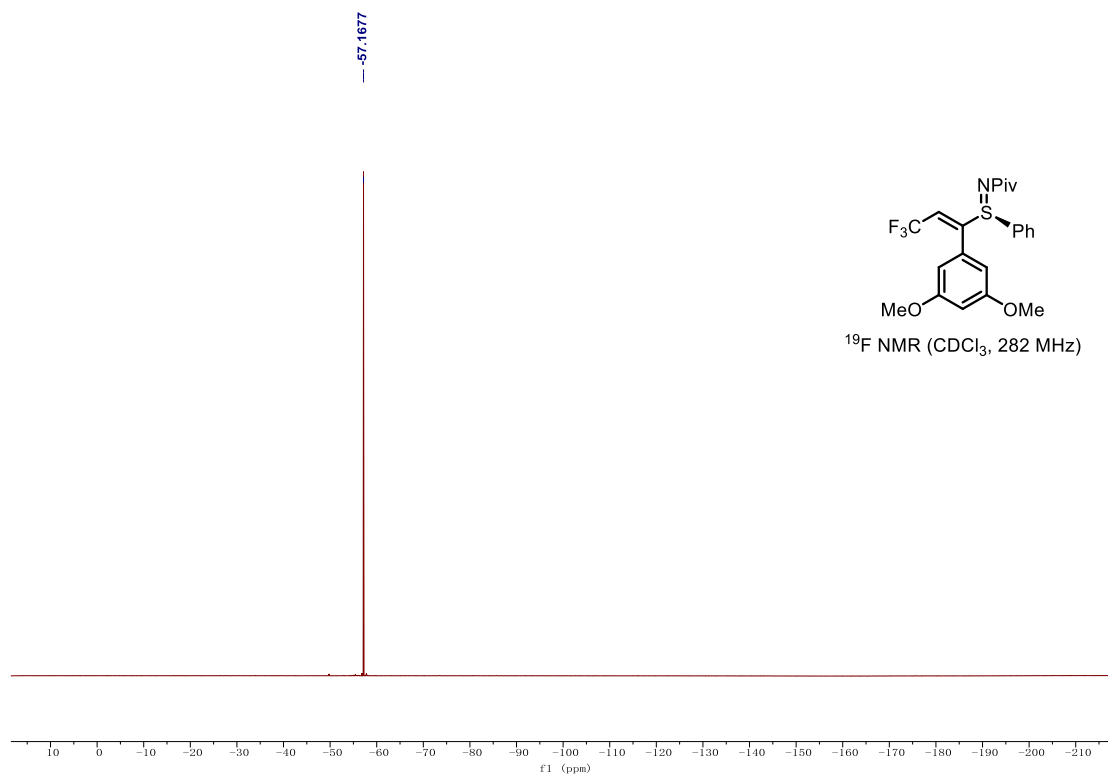

### <sup>1</sup>H NMR Spectrum of 4ao

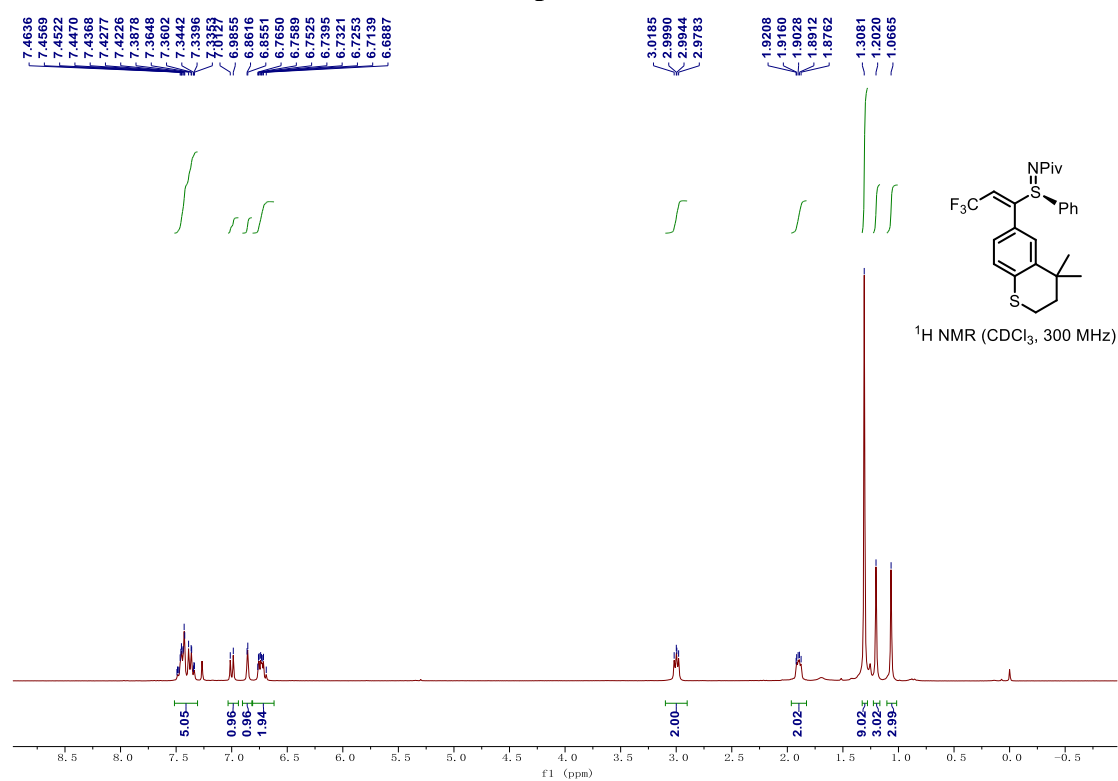

### <sup>13</sup>C NMR Spectrum of 4ao

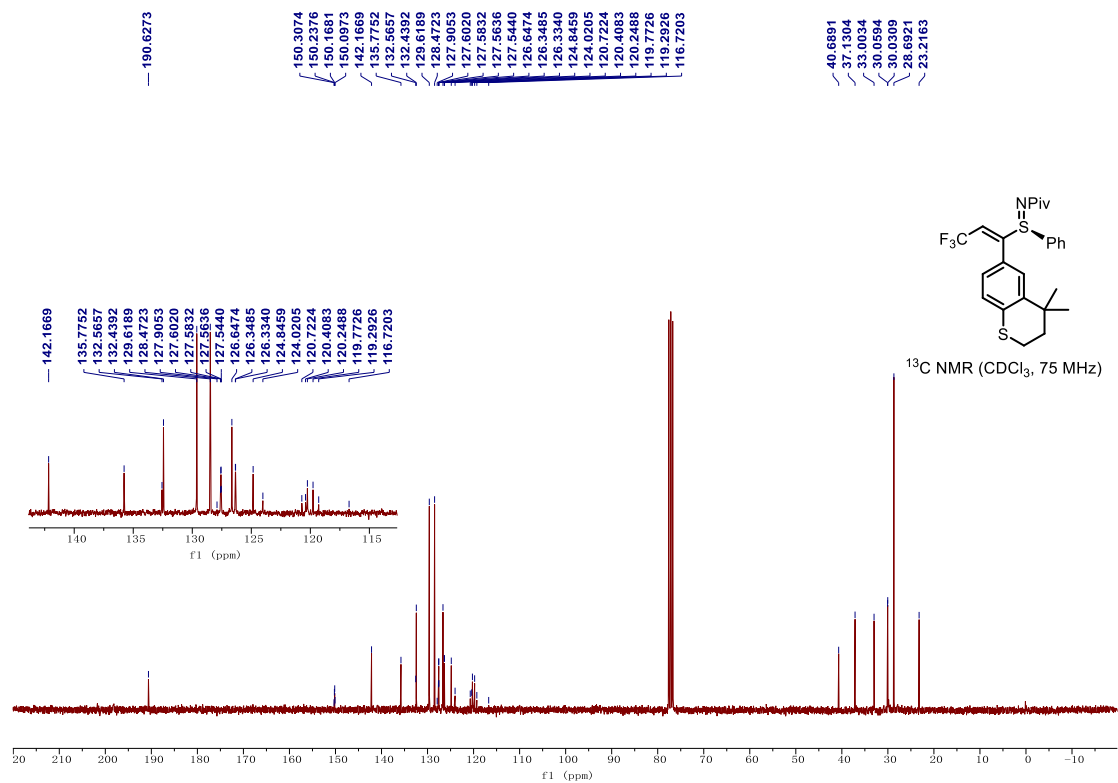

# <sup>19</sup>F NMR Spectrum of 4ao

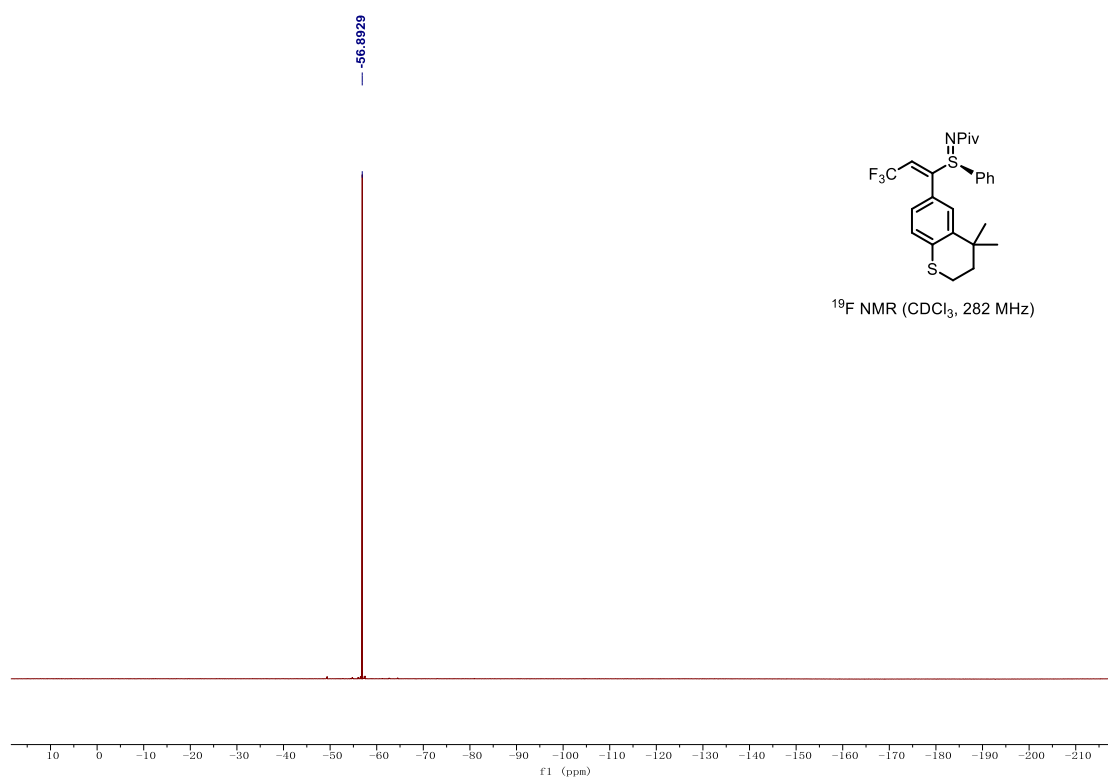

### <sup>1</sup>H NMR Spectrum of 4ap

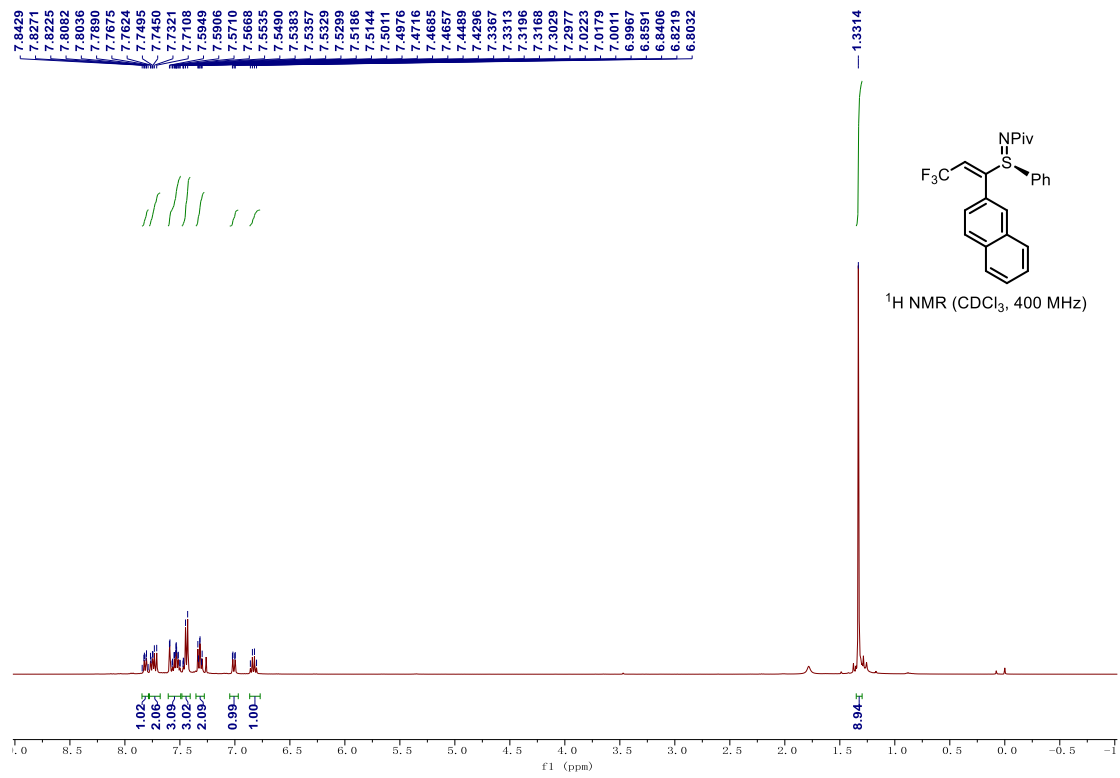

### <sup>13</sup>C NMR Spectrum of 4ap

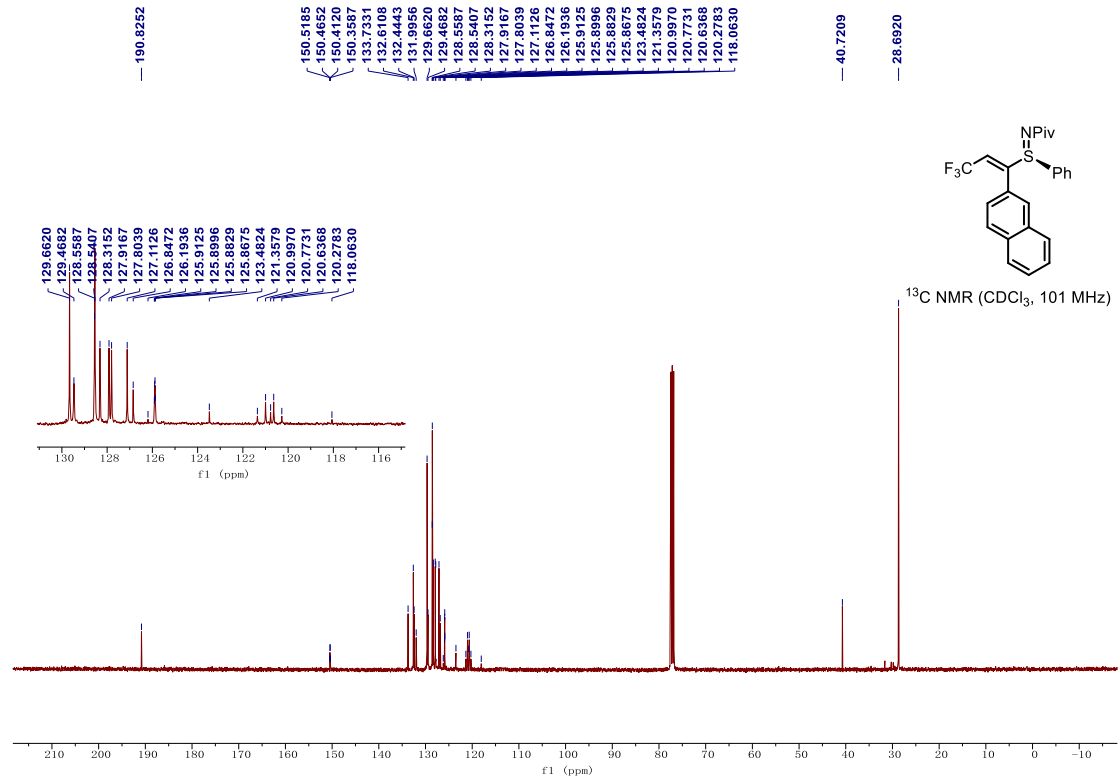

# <sup>19</sup>F NMR Spectrum of 4ap

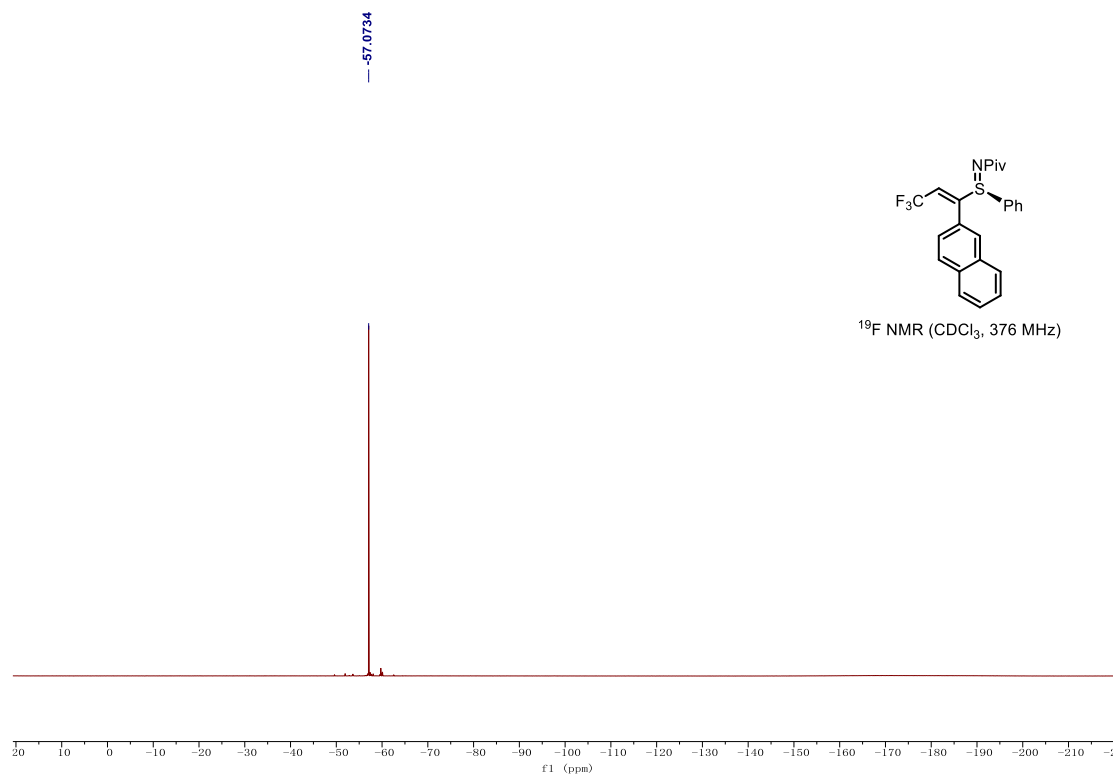

### <sup>1</sup>H NMR Spectrum of 4aq

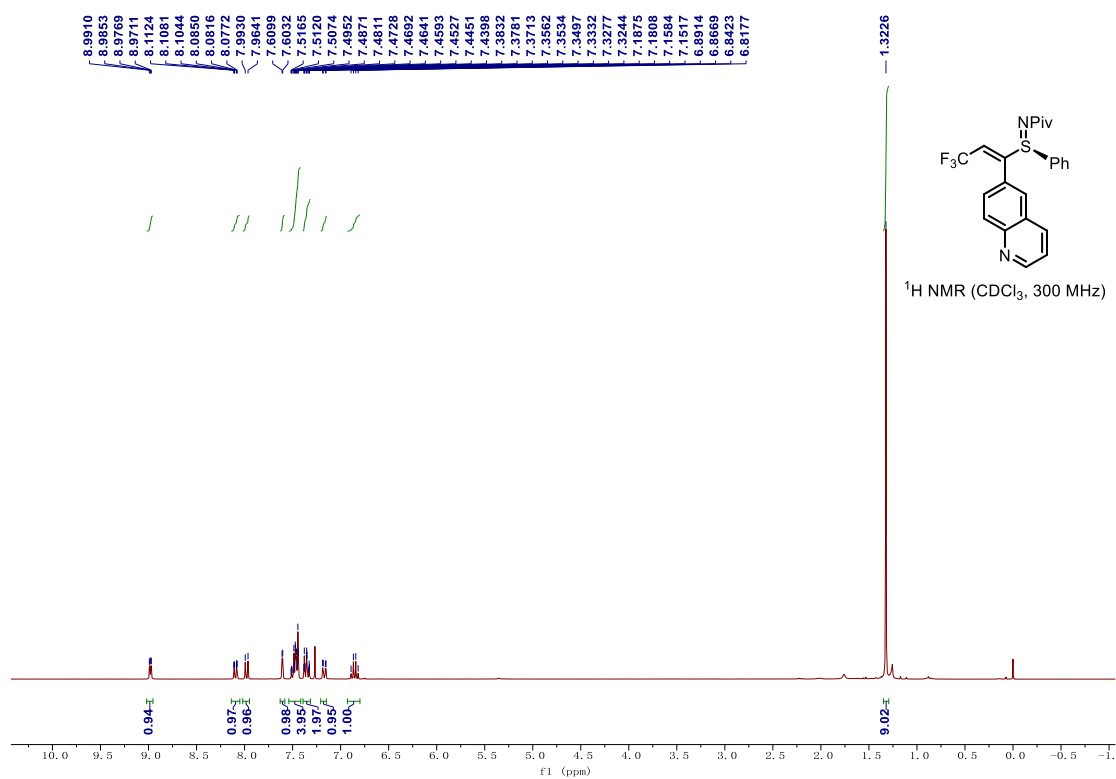

### <sup>13</sup>C NMR Spectrum of 4aq

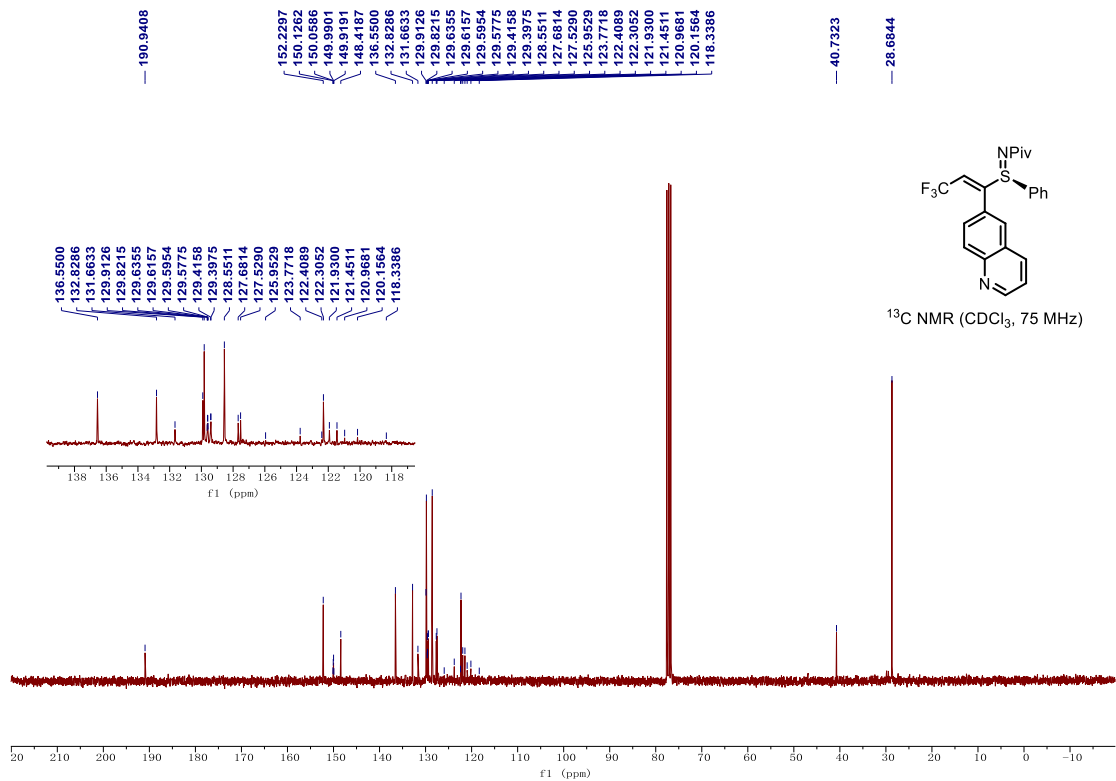

# <sup>19</sup>F NMR Spectrum of 4aq

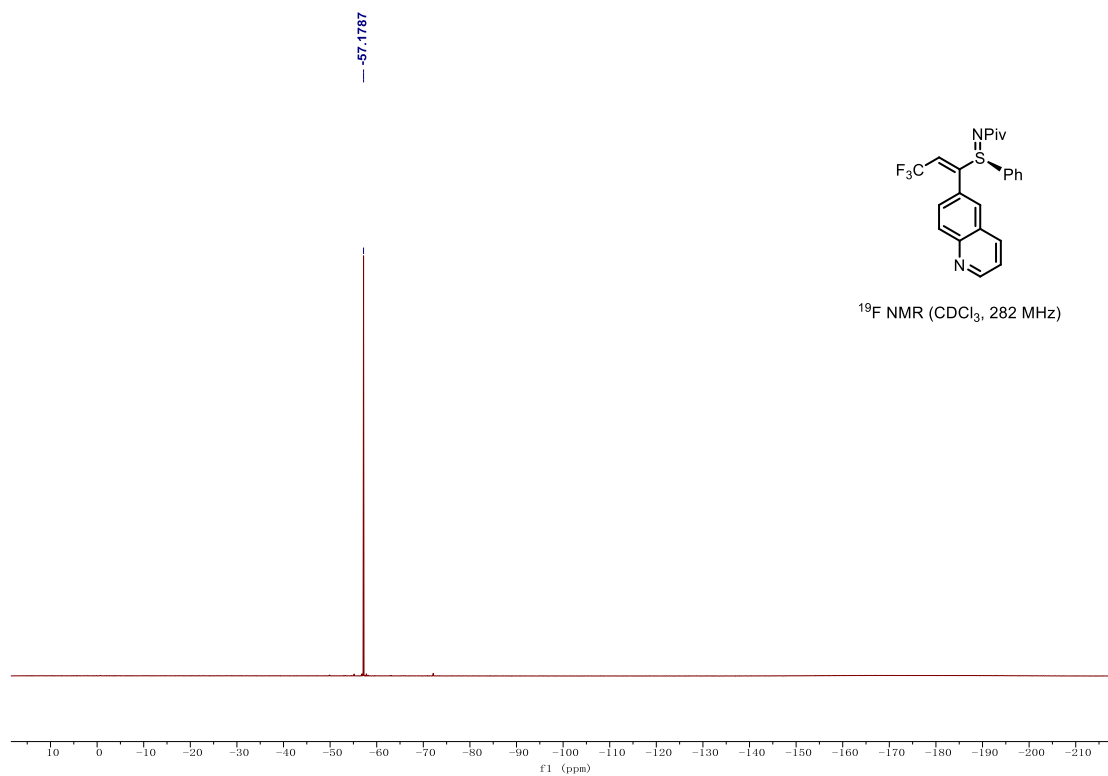

### <sup>1</sup>H NMR Spectrum of 4ar

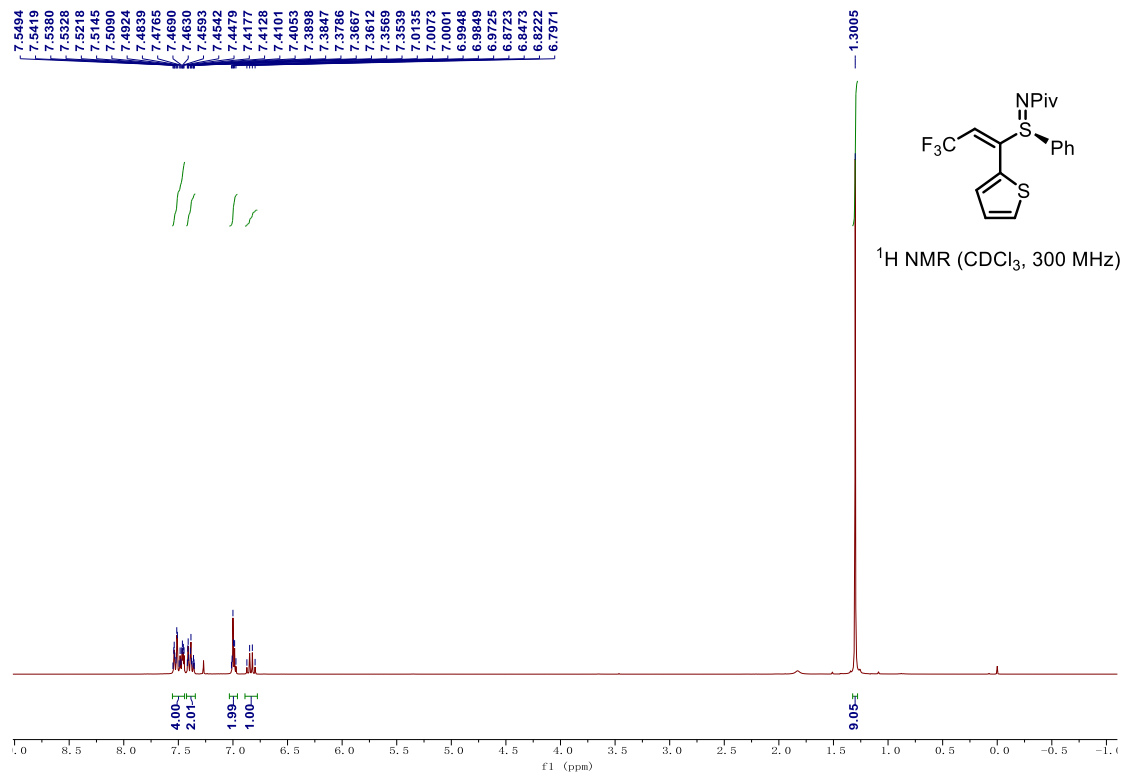

### <sup>13</sup>C NMR Spectrum of 4ar

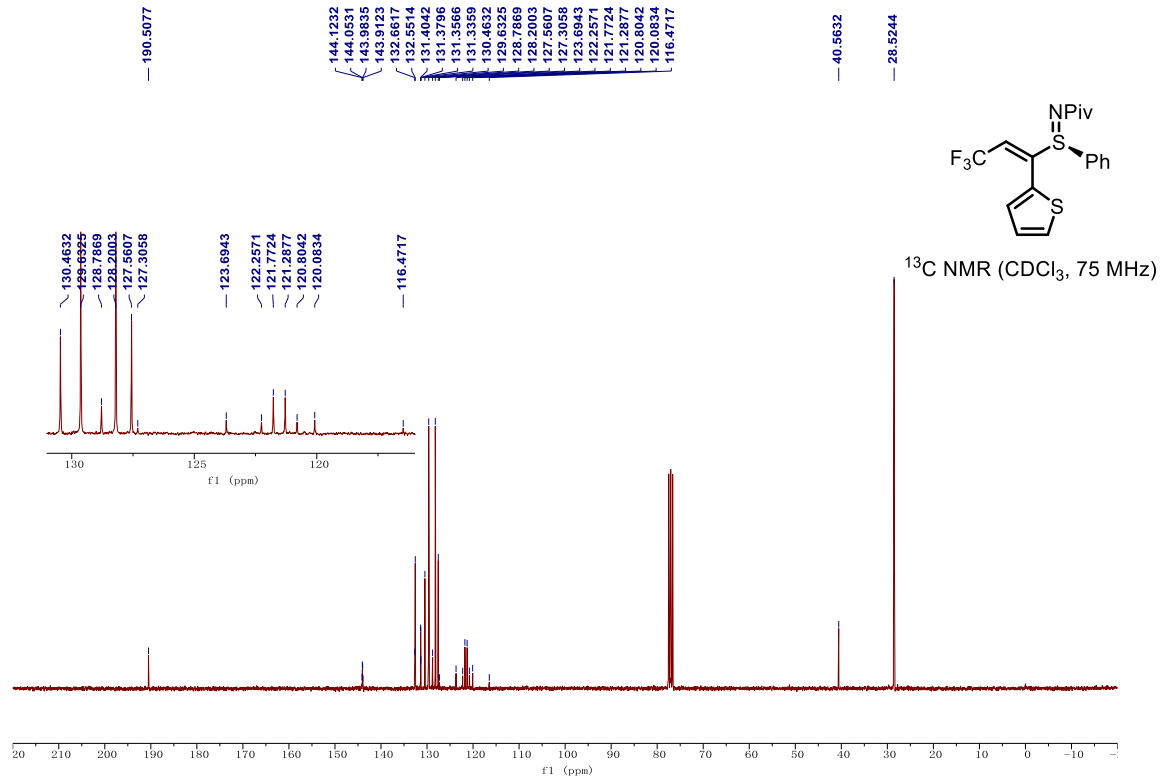

# <sup>19</sup>F NMR Spectrum of 4ar

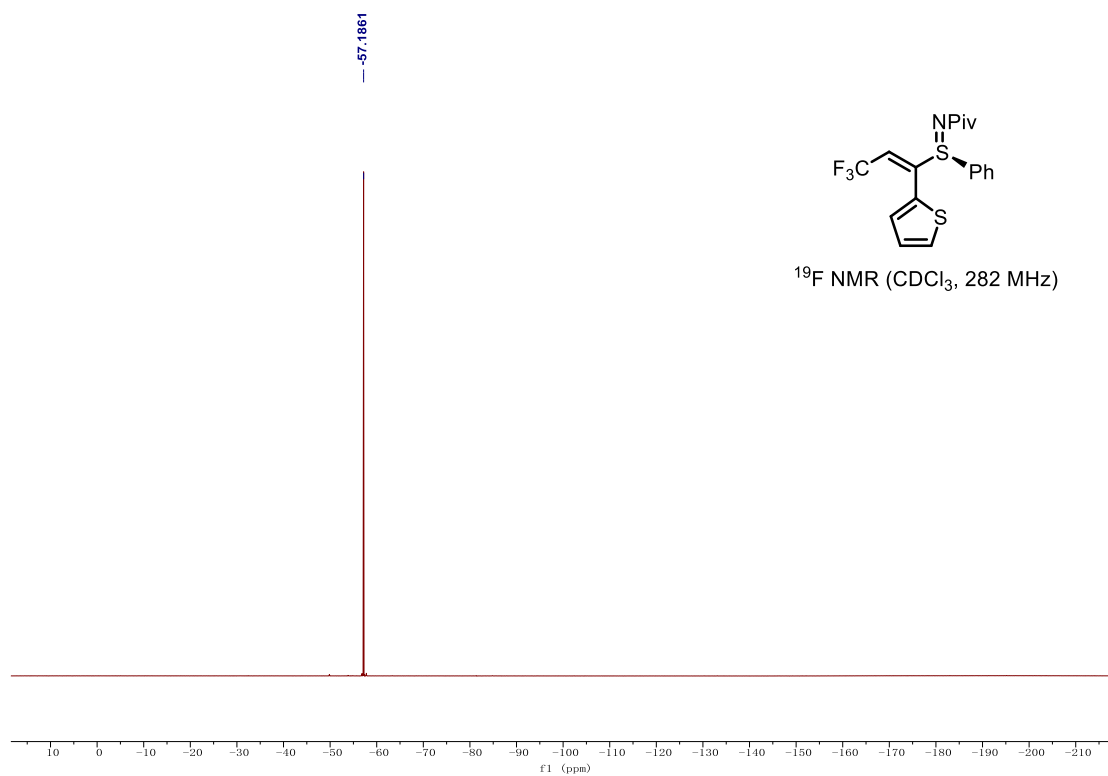

### <sup>1</sup>H NMR Spectrum of 4as

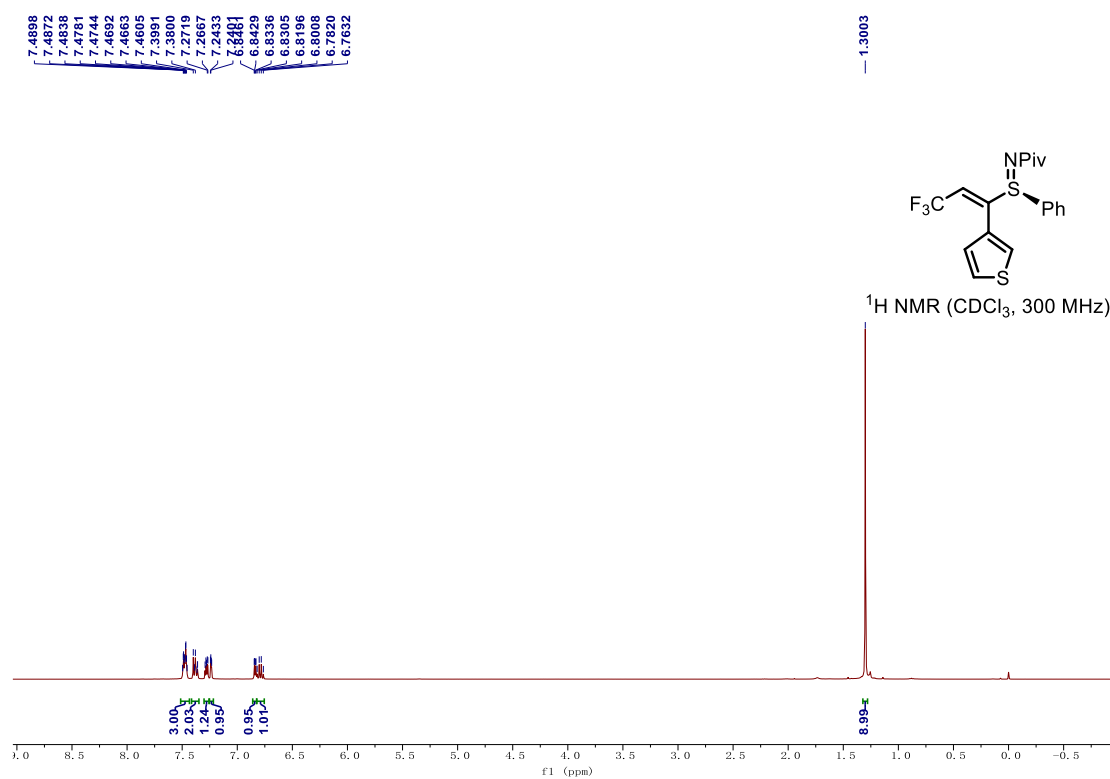

### <sup>13</sup>C NMR Spectrum of 4as

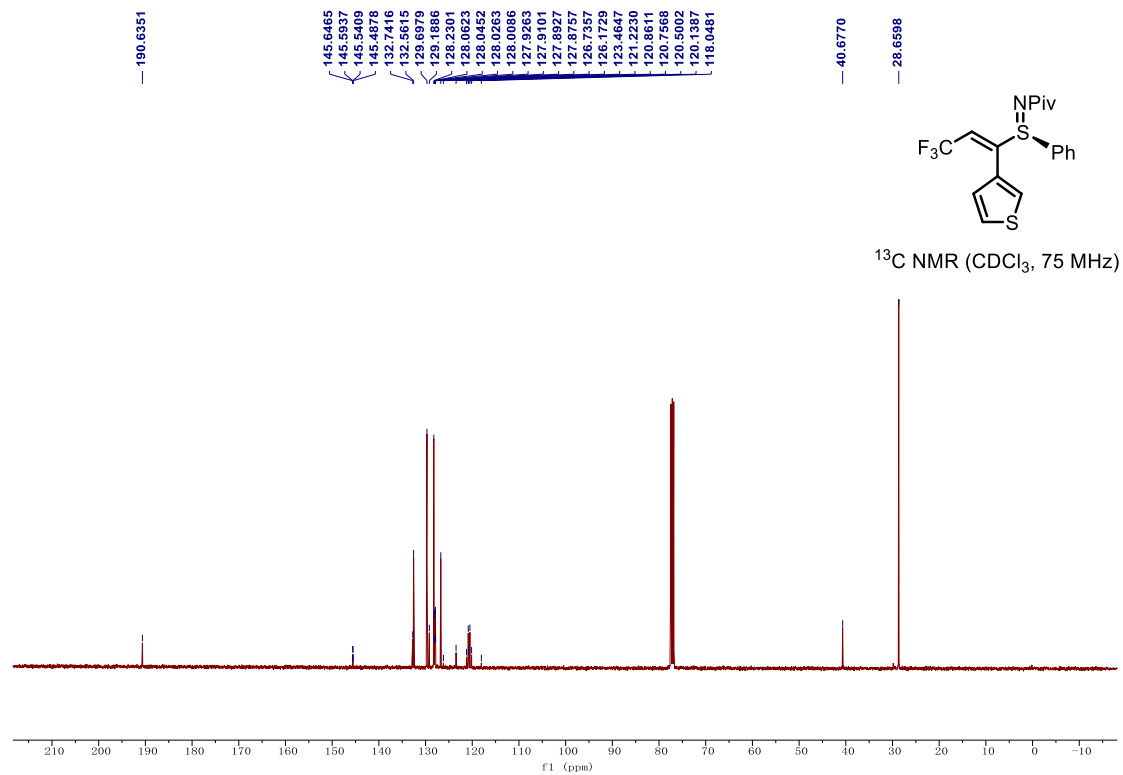

# <sup>19</sup>F NMR Spectrum of 4as

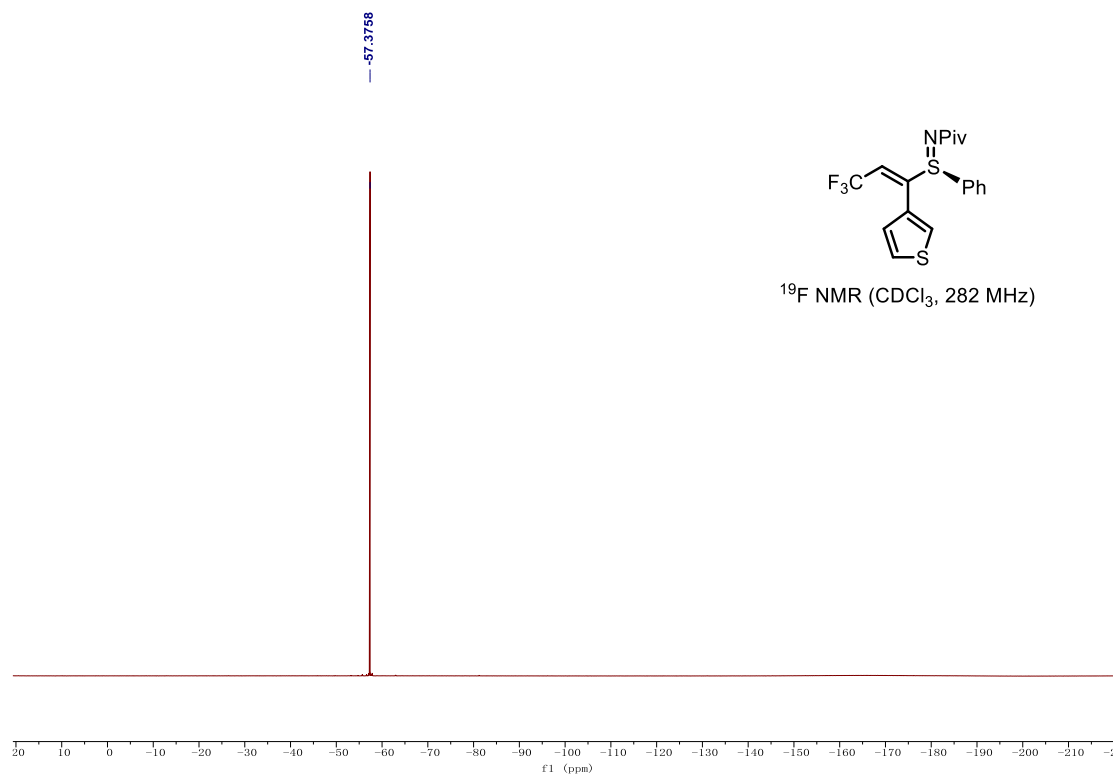

### <sup>1</sup>H NMR Spectrum of 4at

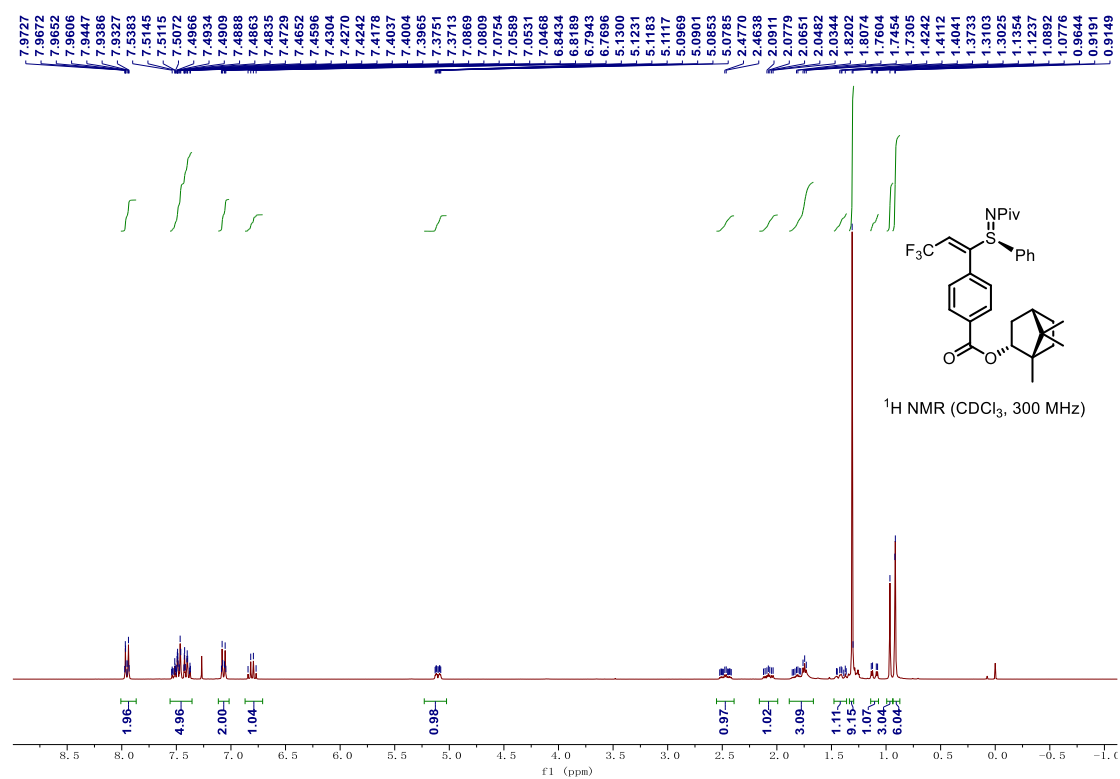

### <sup>13</sup>C NMR Spectrum of 4at

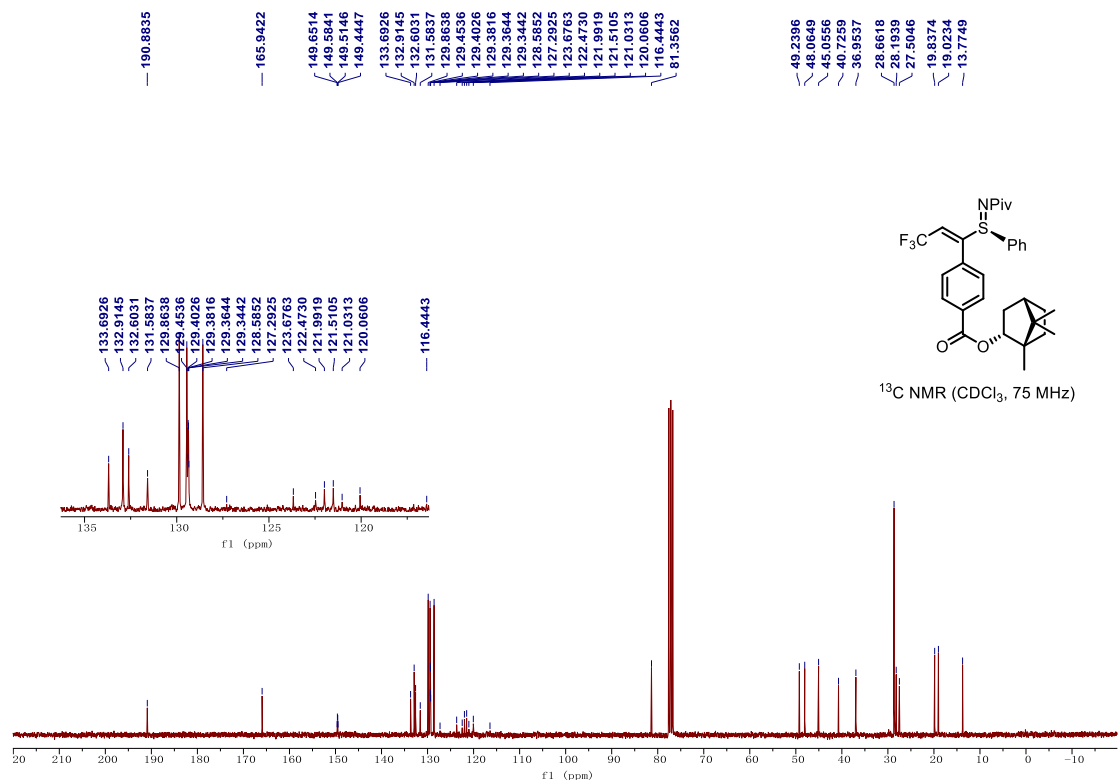

# <sup>19</sup>F NMR Spectrum of 4at

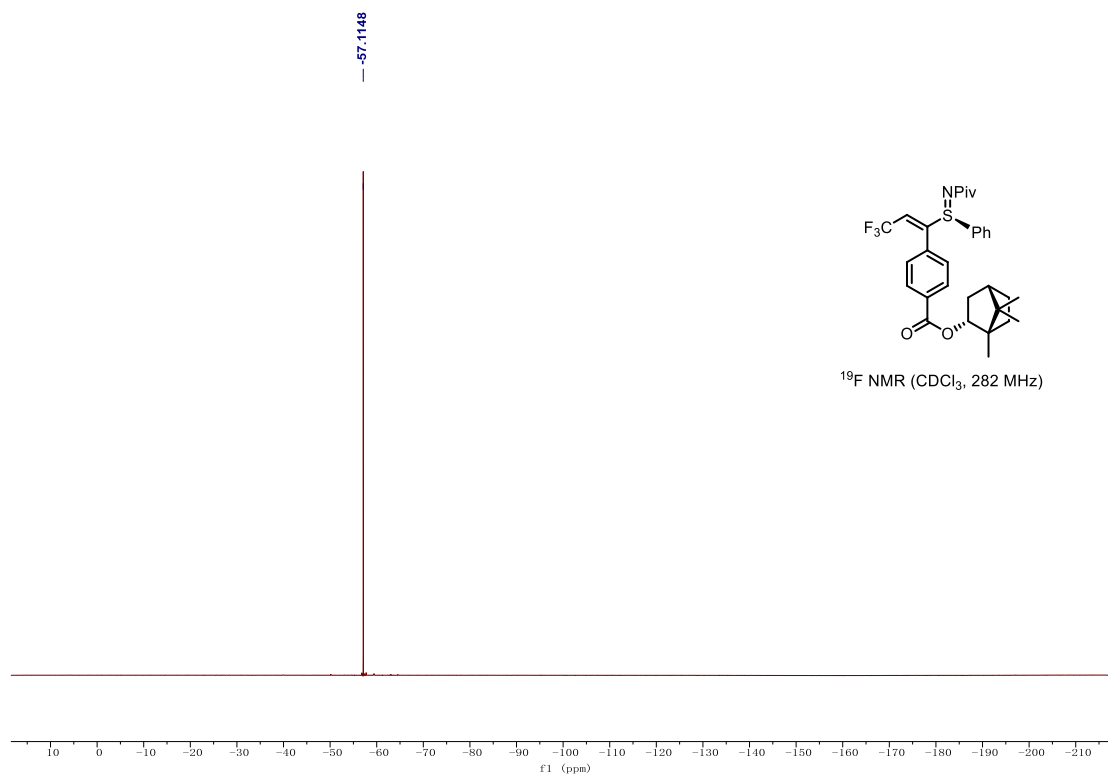

### <sup>1</sup>H NMR Spectrum of 4au

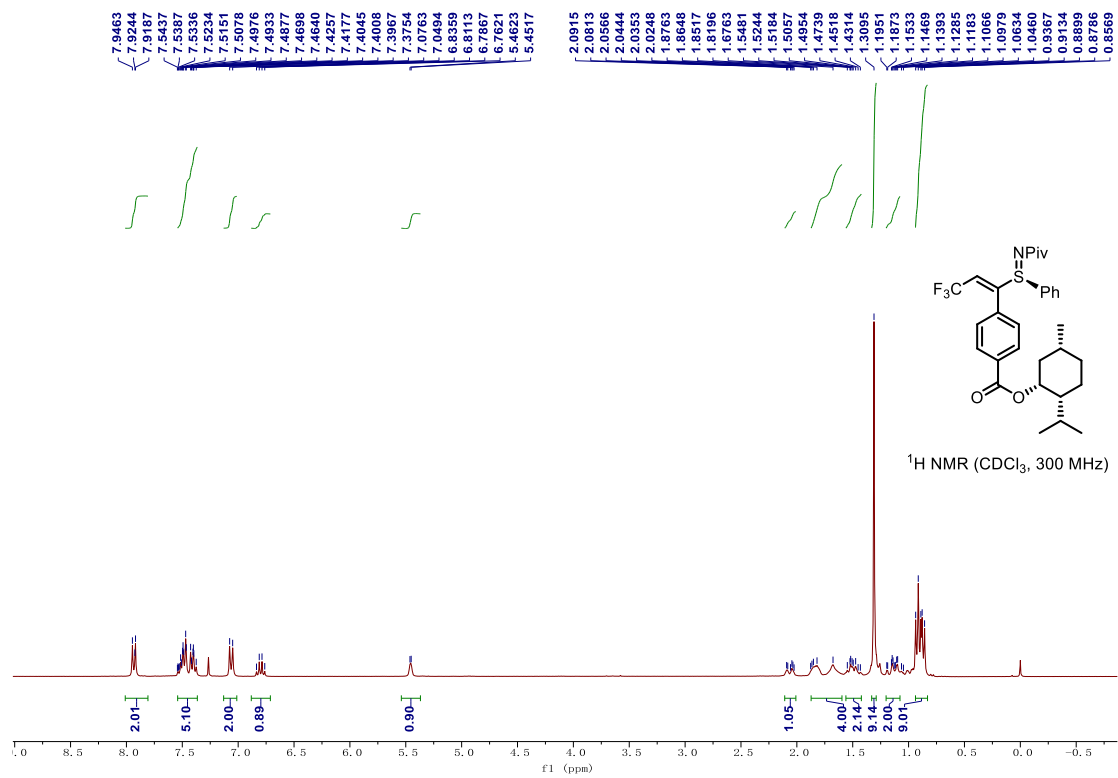

### <sup>13</sup>C NMR Spectrum of 4au

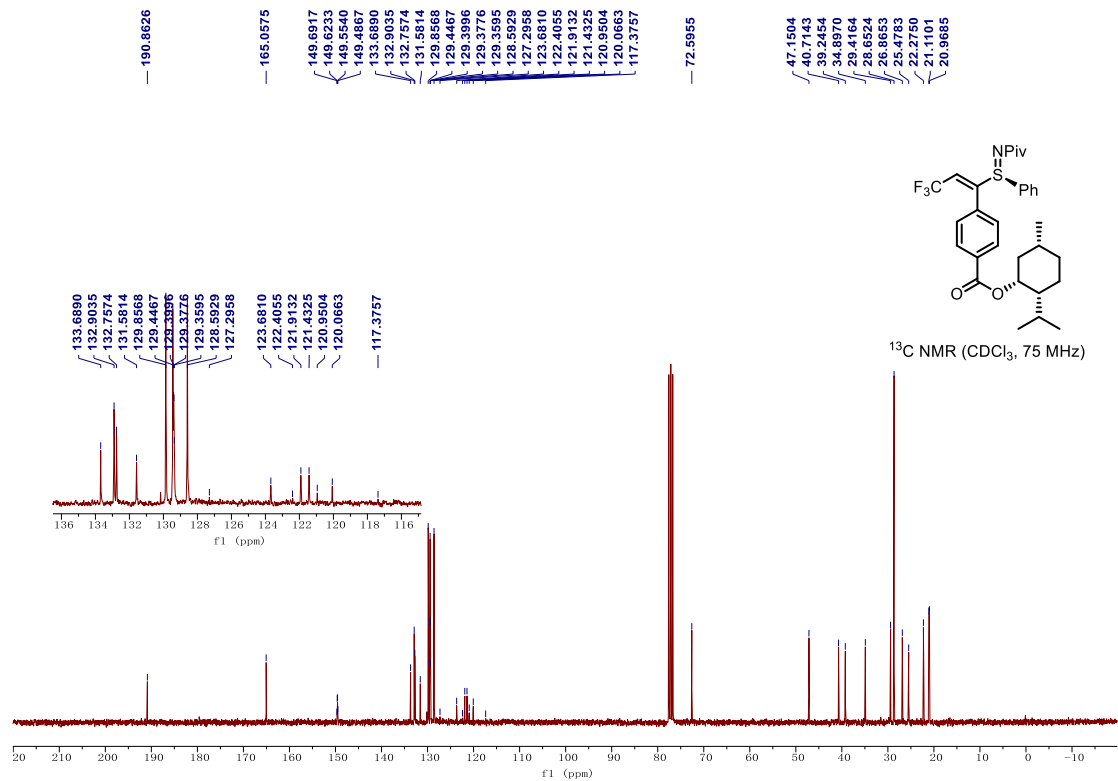

# <sup>19</sup>F NMR Spectrum of 4au

-57.0972

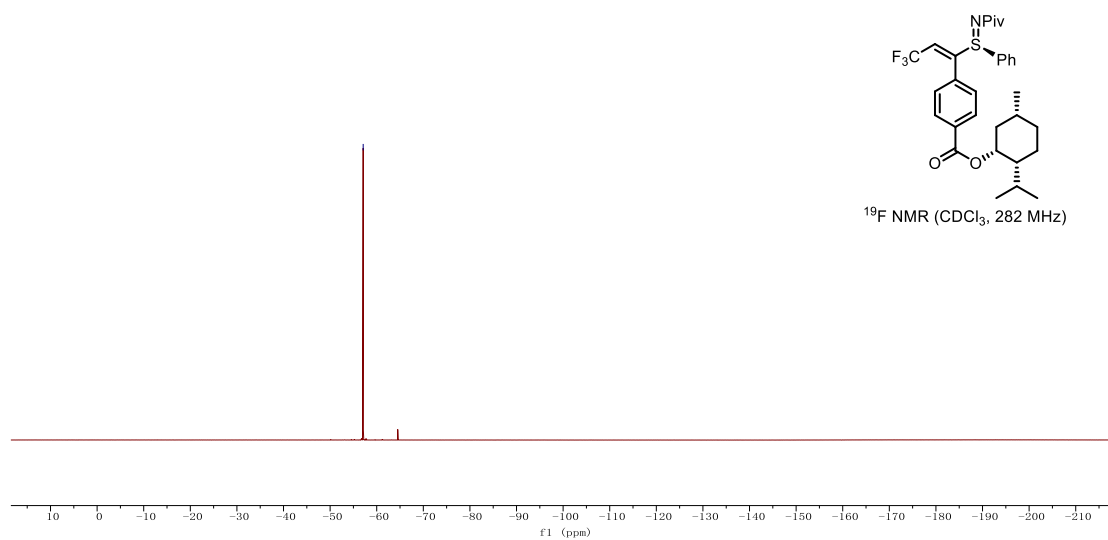

### <sup>1</sup>H NMR Spectrum of 4av

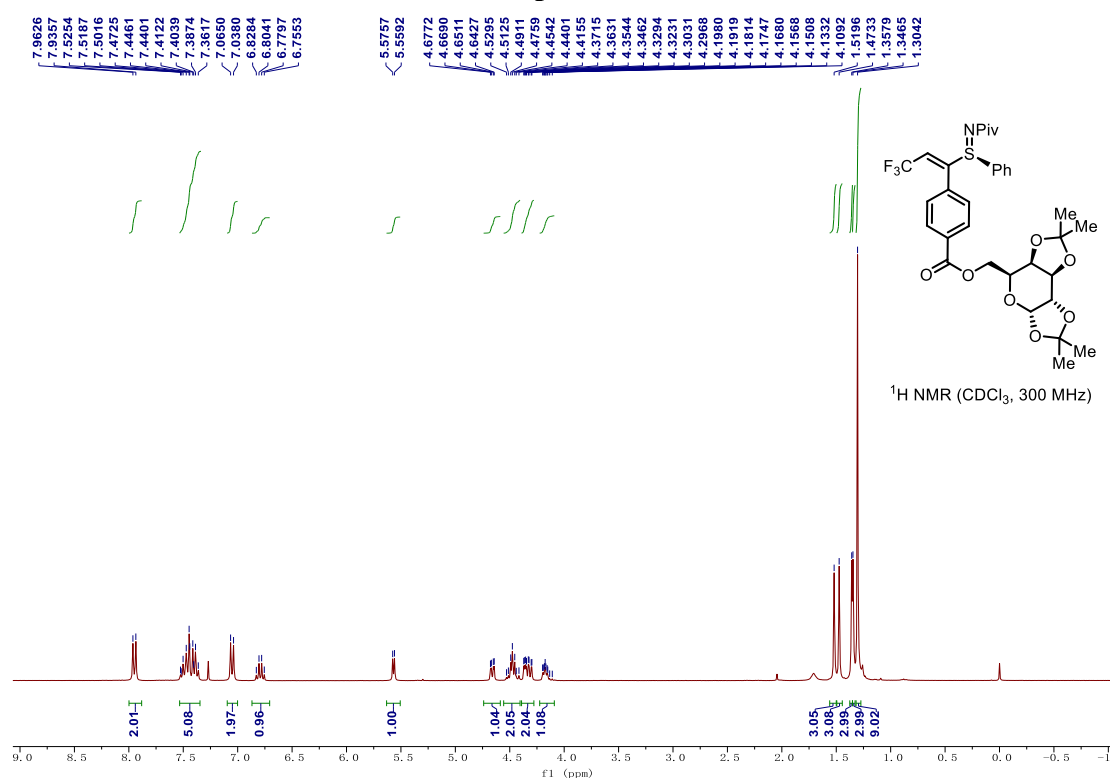

### <sup>13</sup>C NMR Spectrum of 4av

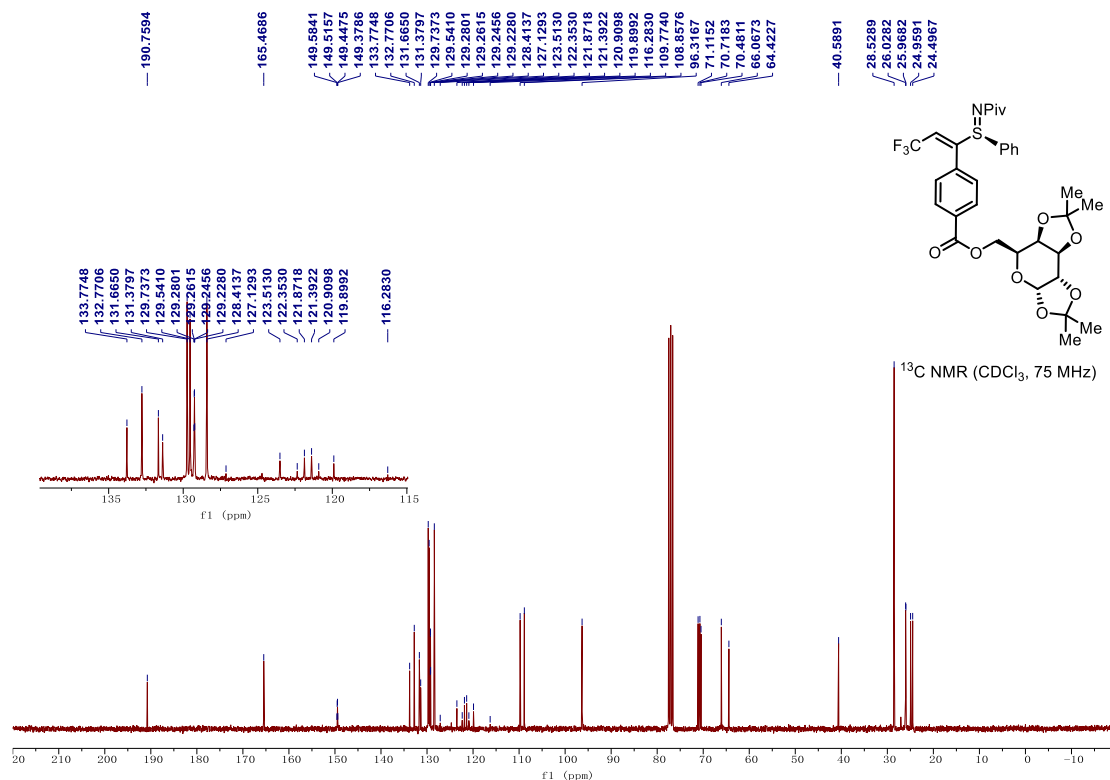

# <sup>19</sup>F NMR Spectrum of 4av

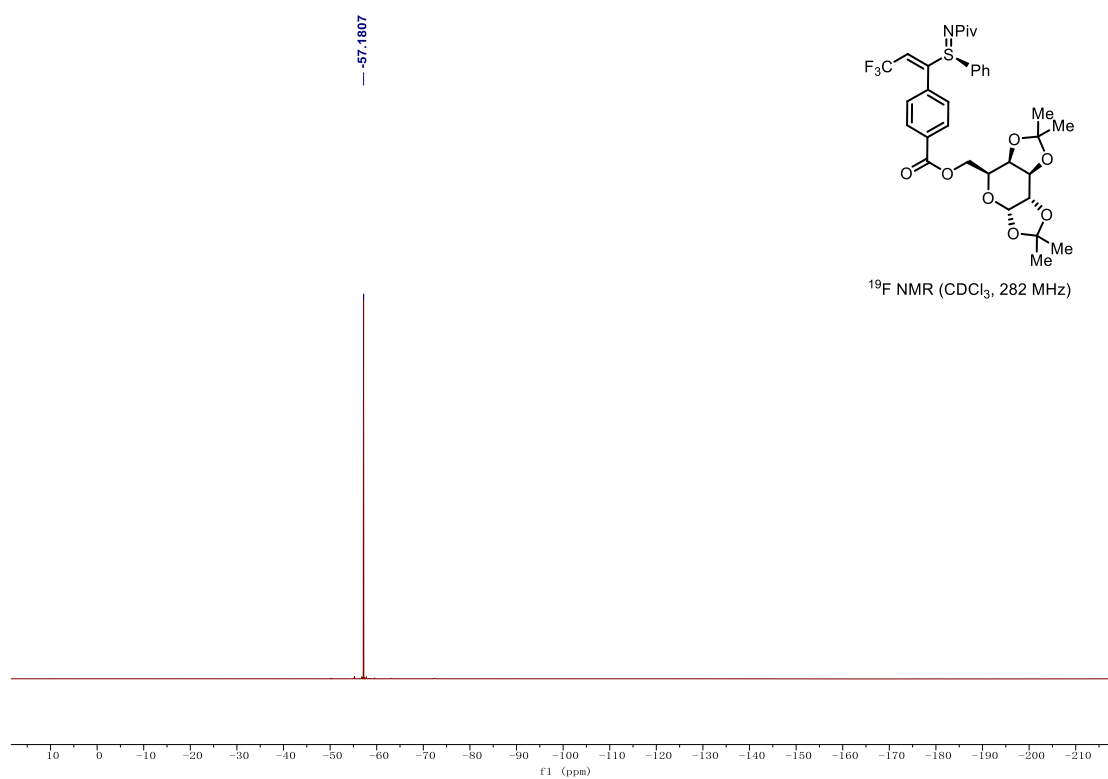

### <sup>1</sup>H NMR Spectrum of 4aw

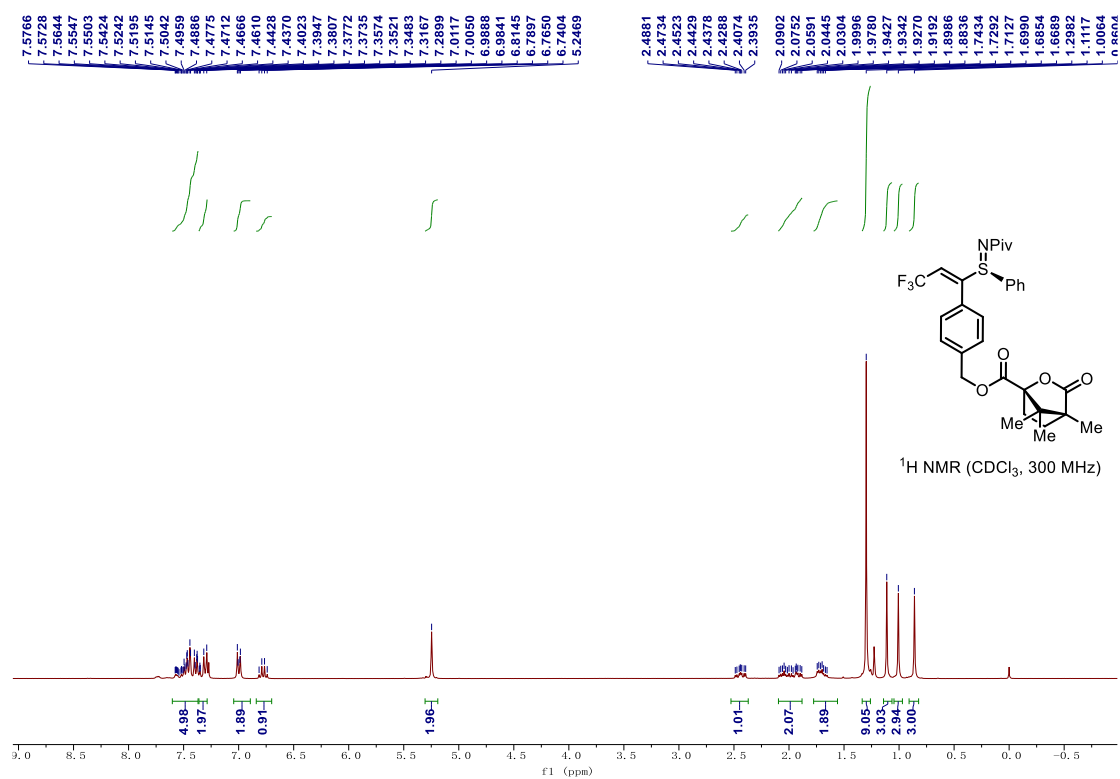

### <sup>13</sup>C NMR Spectrum of 4aw

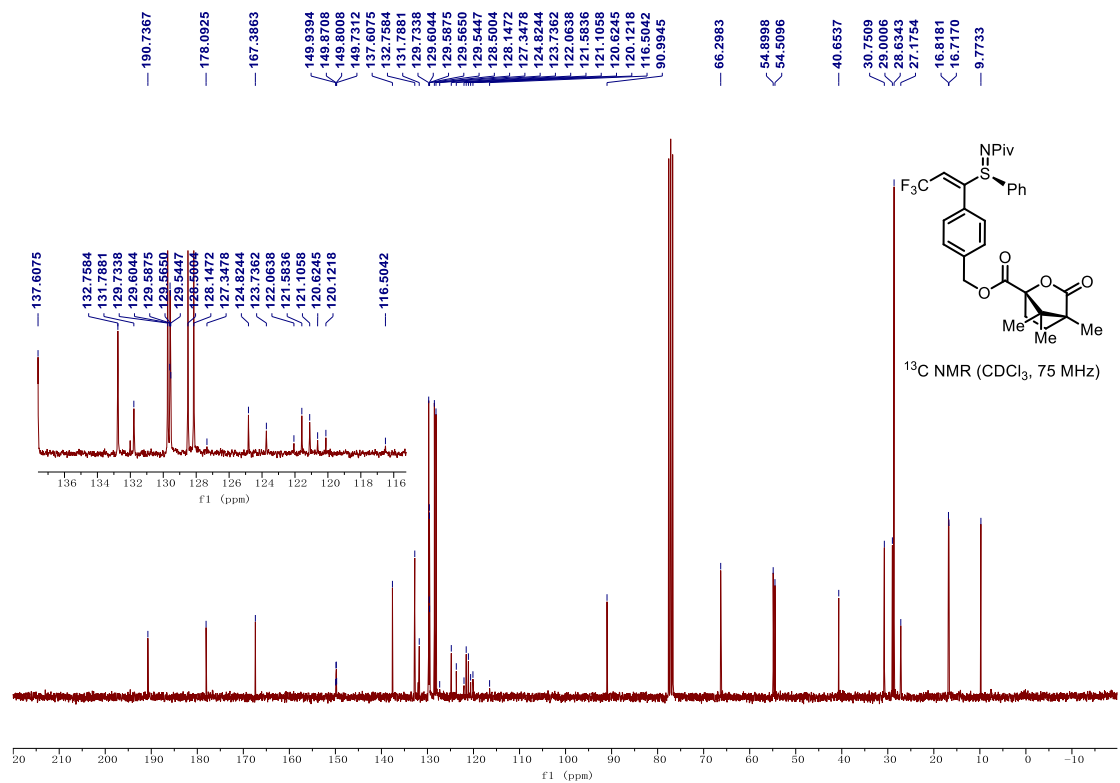

# <sup>19</sup>F NMR Spectrum of 4aw

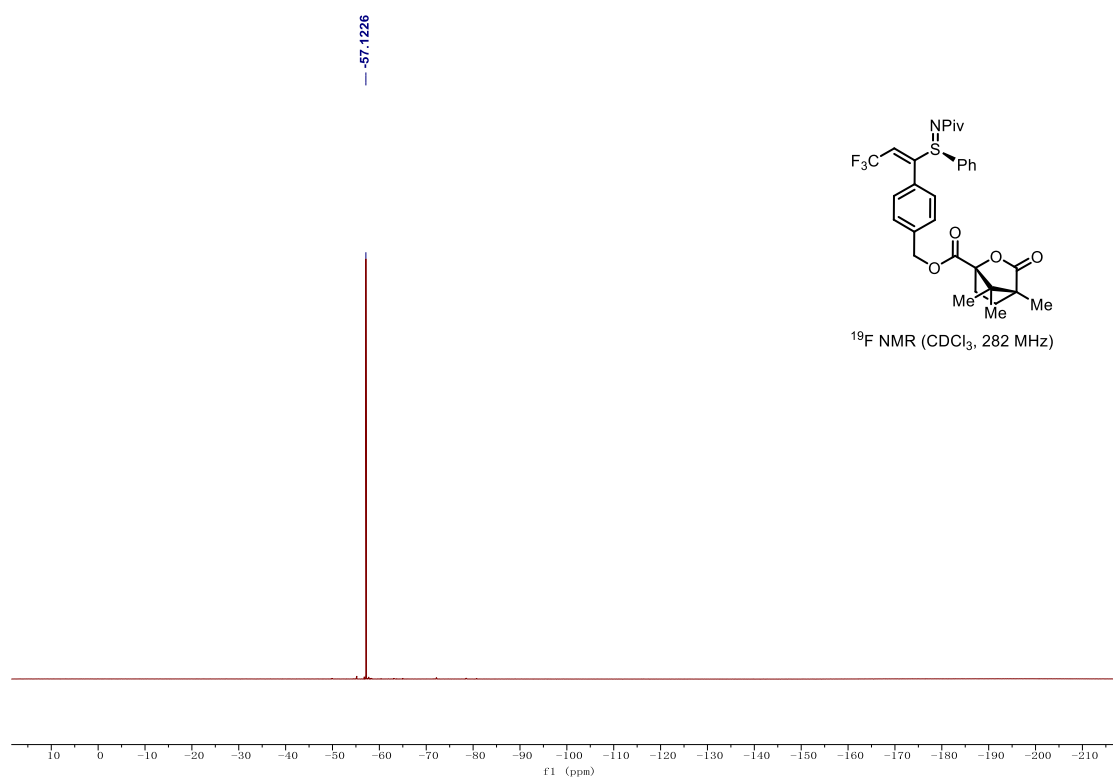

### <sup>1</sup>H NMR Spectrum of 4ax

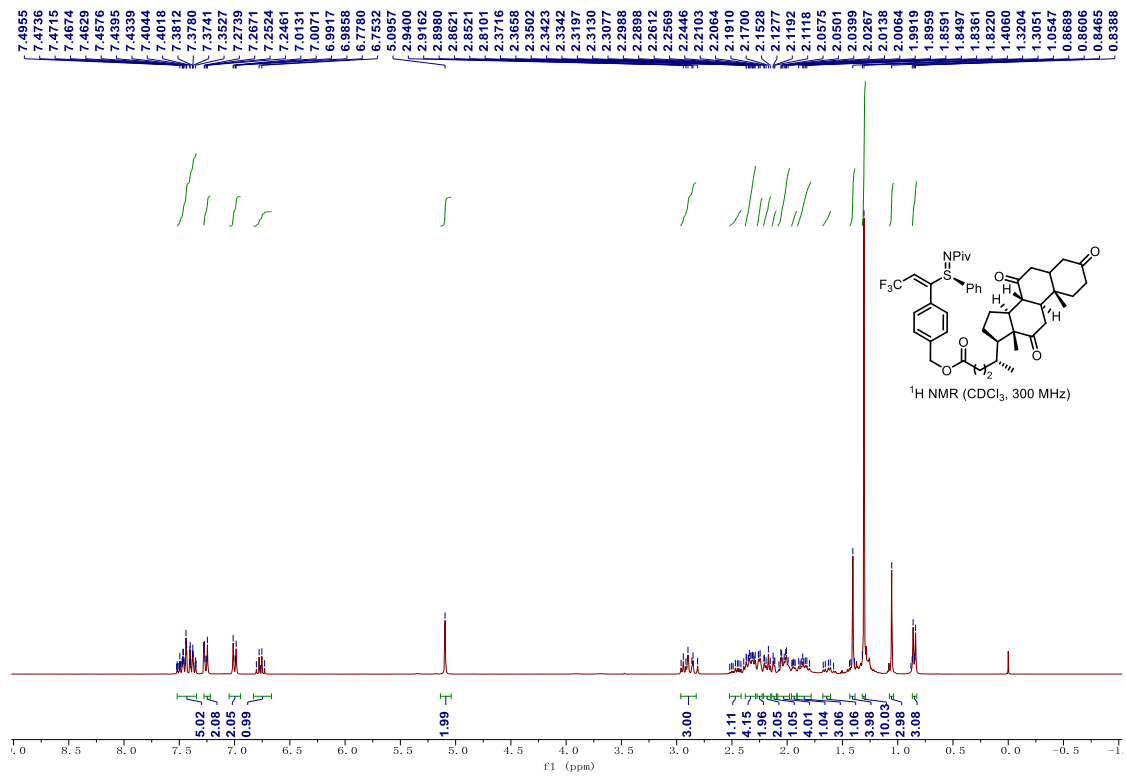

### <sup>13</sup>C NMR Spectrum of 4ax

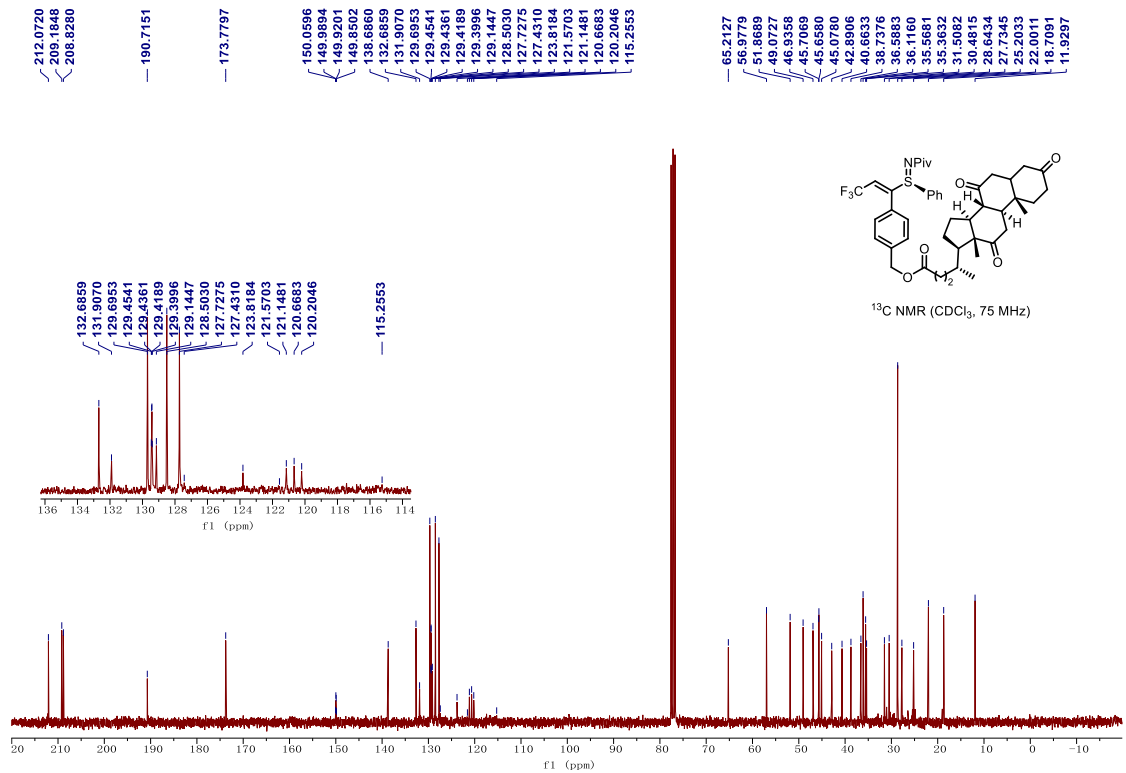

# <sup>19</sup>F NMR Spectrum of 4ax

-57.0014

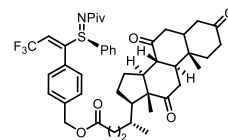

<sup>19</sup>F NMR (CDCl<sub>3</sub>, 282 MHz)

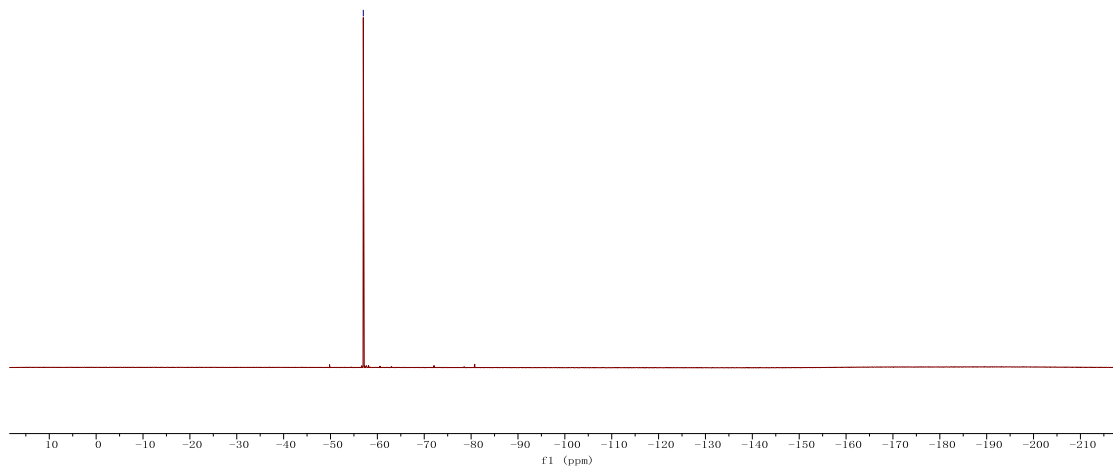

### <sup>1</sup>H NMR Spectrum of 4ay

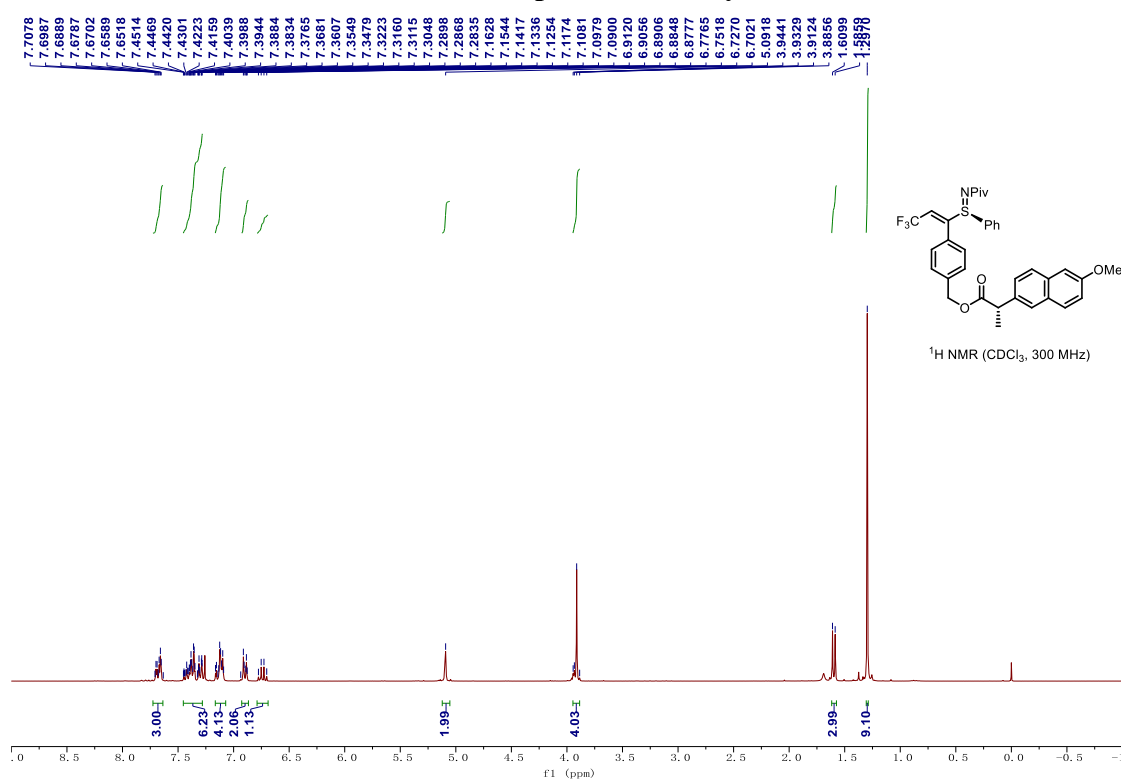

### <sup>13</sup>C NMR Spectrum of 4ay

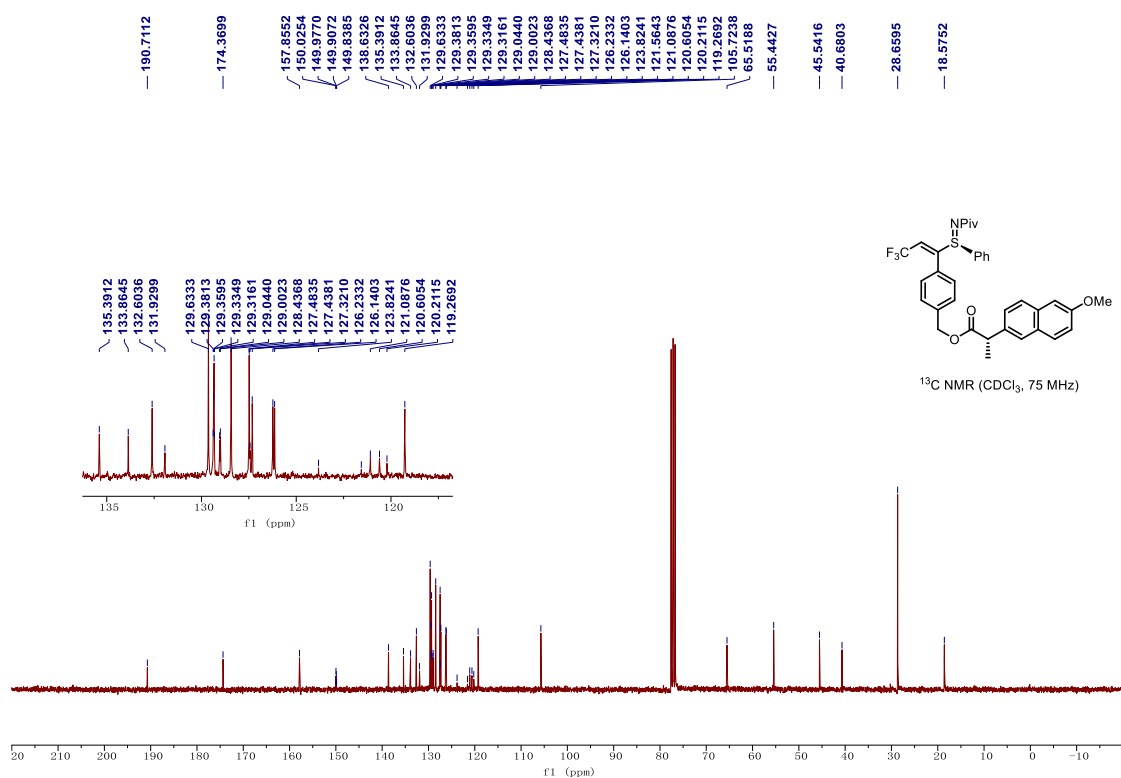

# <sup>19</sup>F NMR Spectrum of 4ay

-57.0466

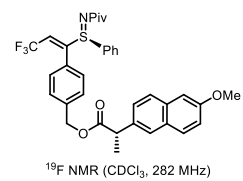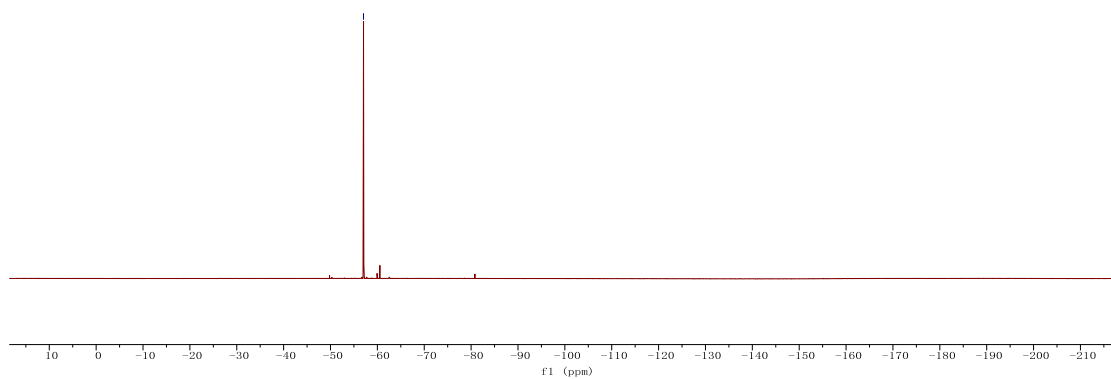

### <sup>1</sup>H NMR Spectrum of 4ba

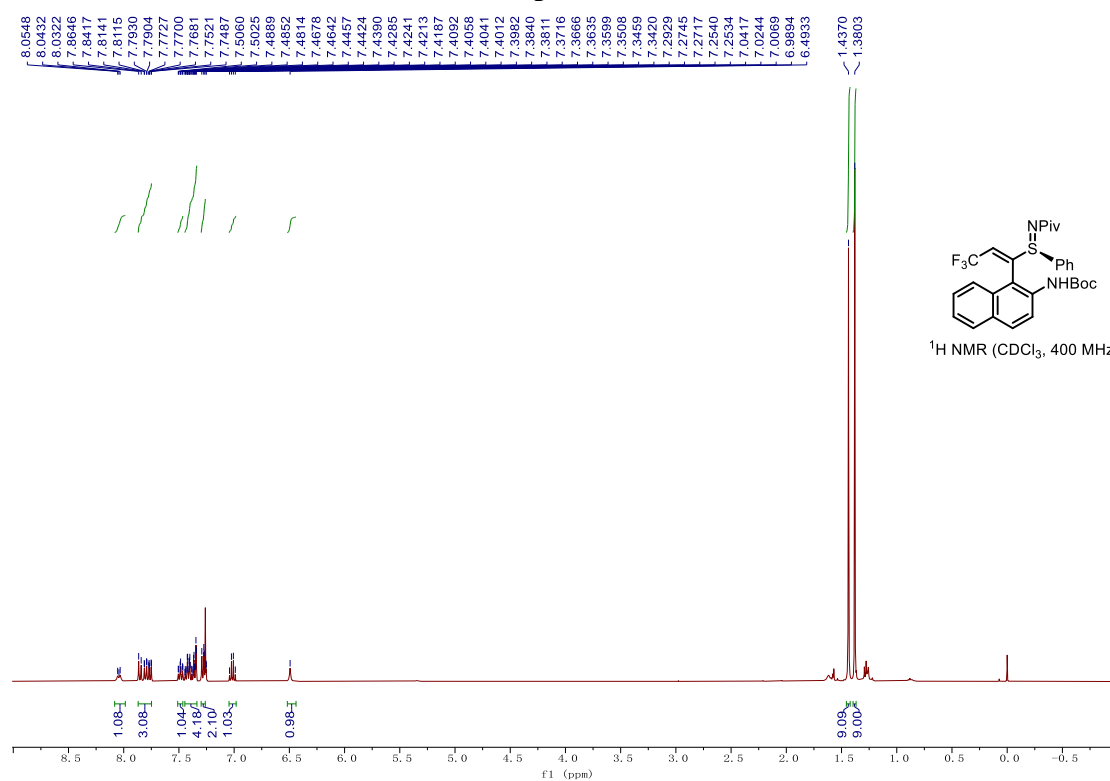

### <sup>13</sup>C NMR Spectrum of 4ba

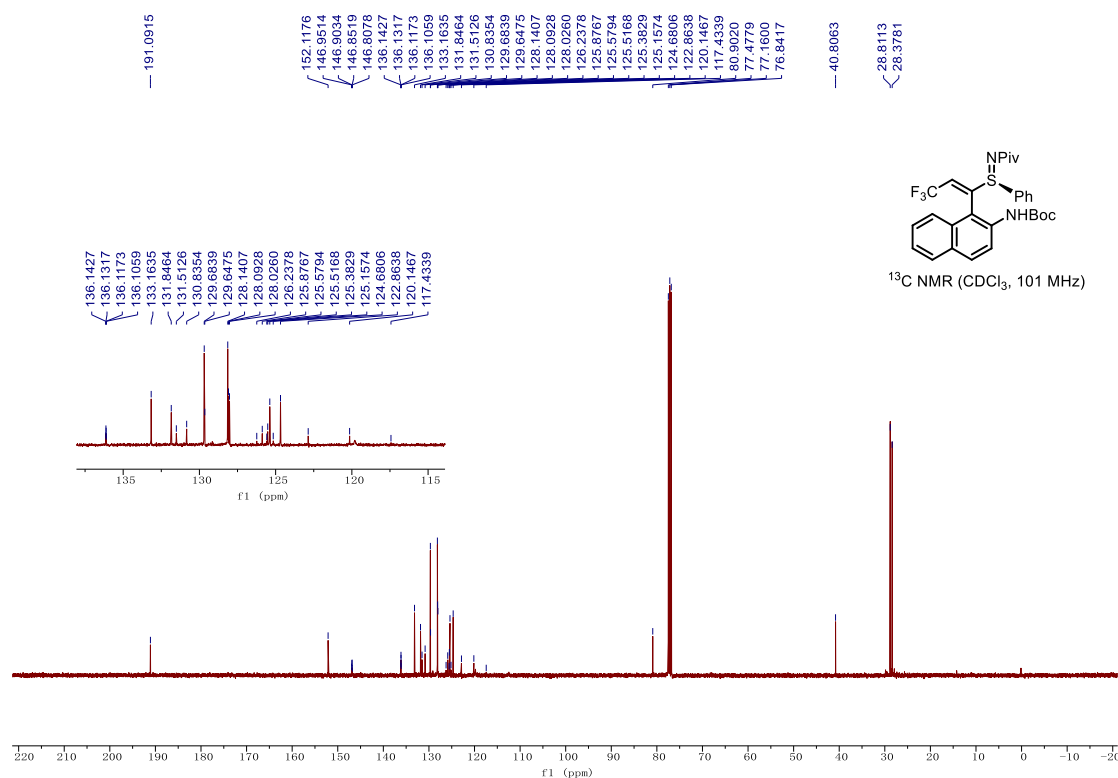

# <sup>19</sup>F NMR Spectrum of 4ba

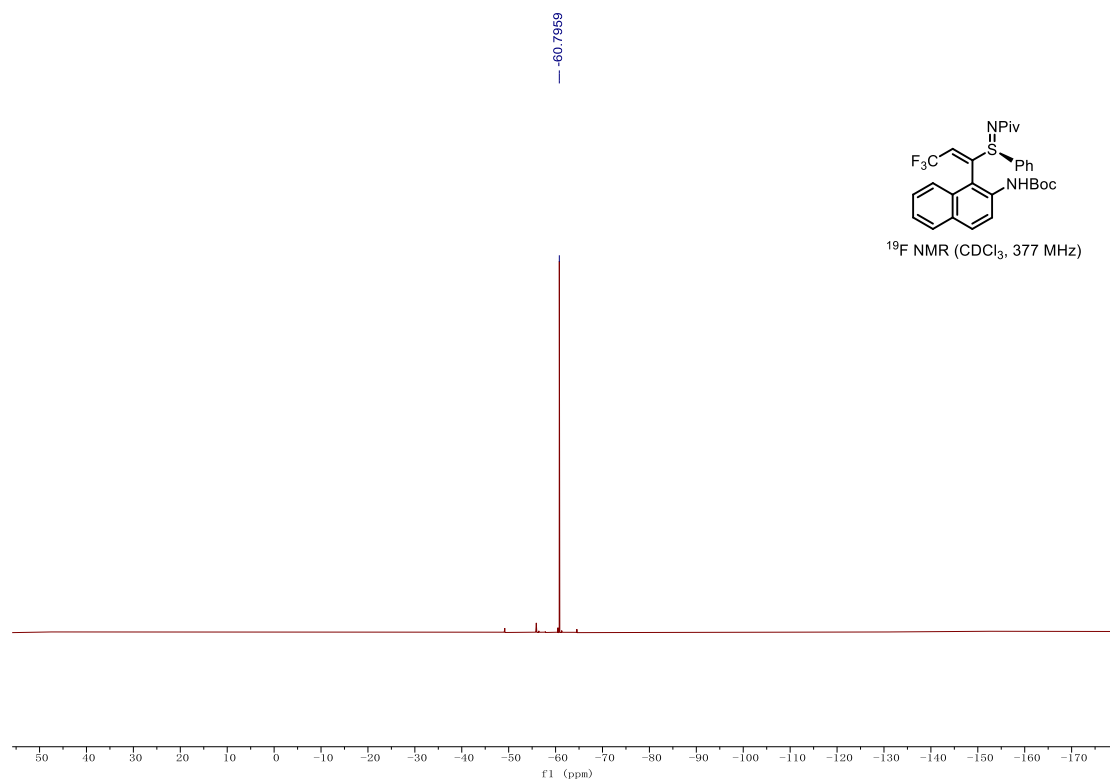

# <sup>1</sup>H NMR Spectrum of 5

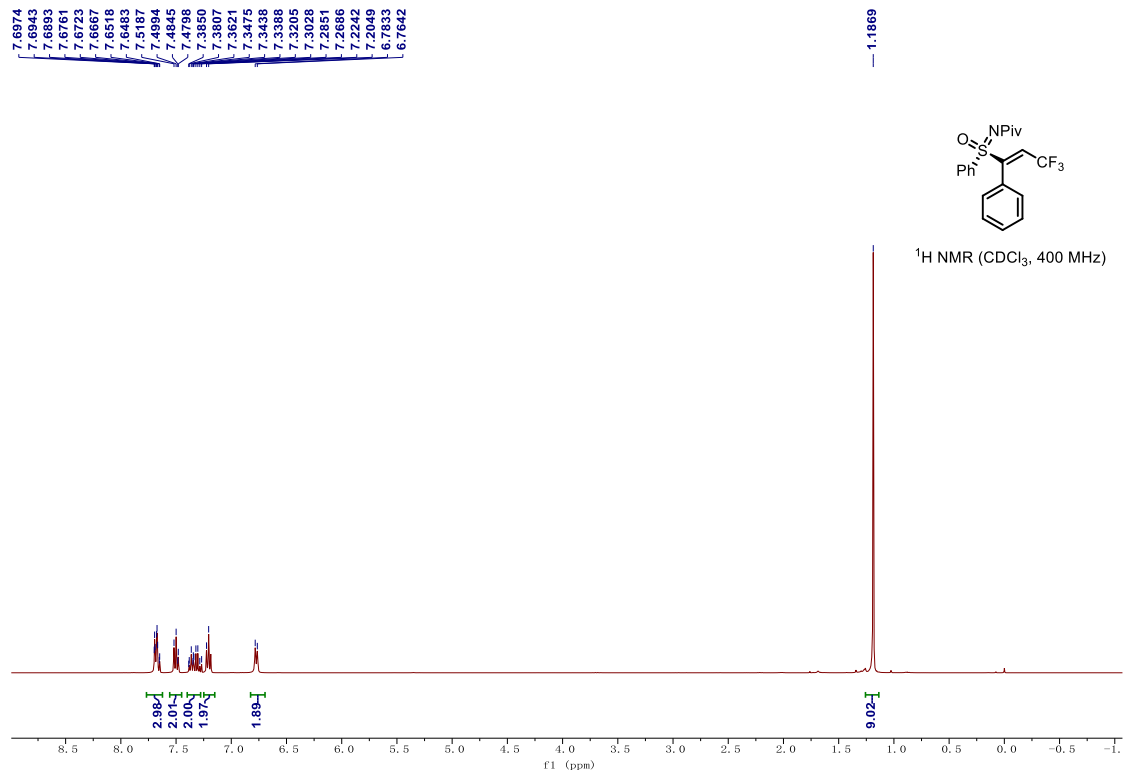

# <sup>13</sup>C NMR Spectrum of 5

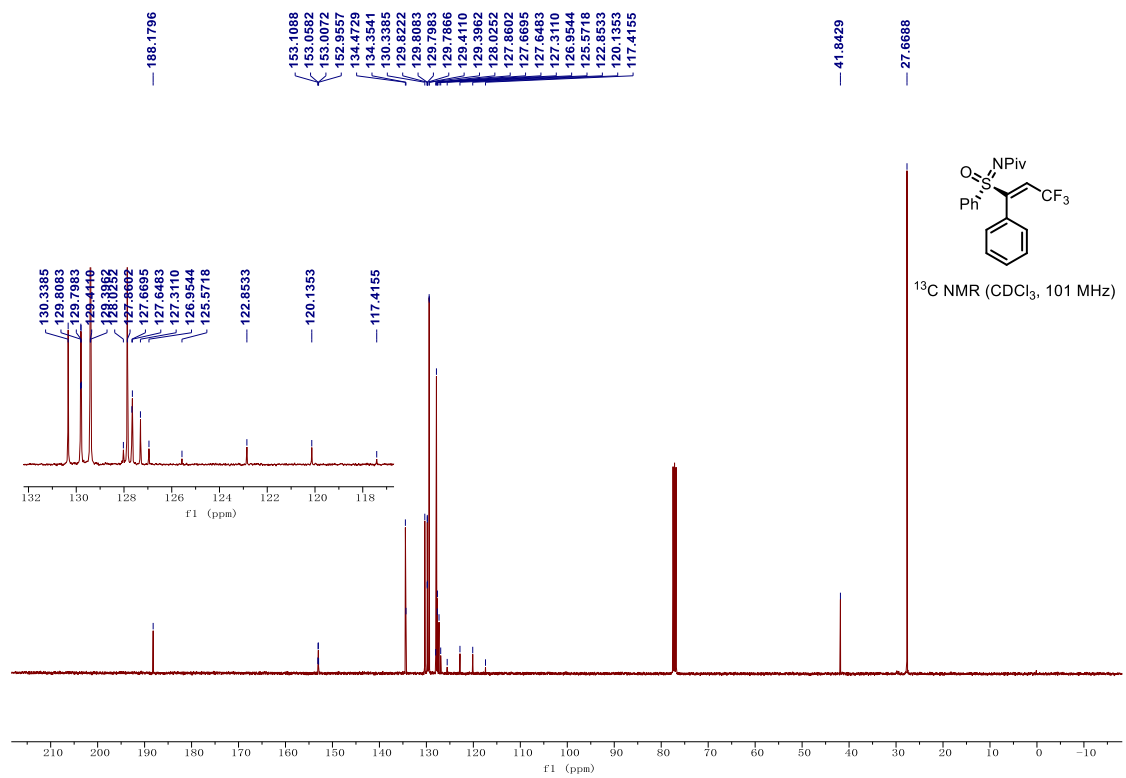

# <sup>19</sup>F NMR Spectrum of 5

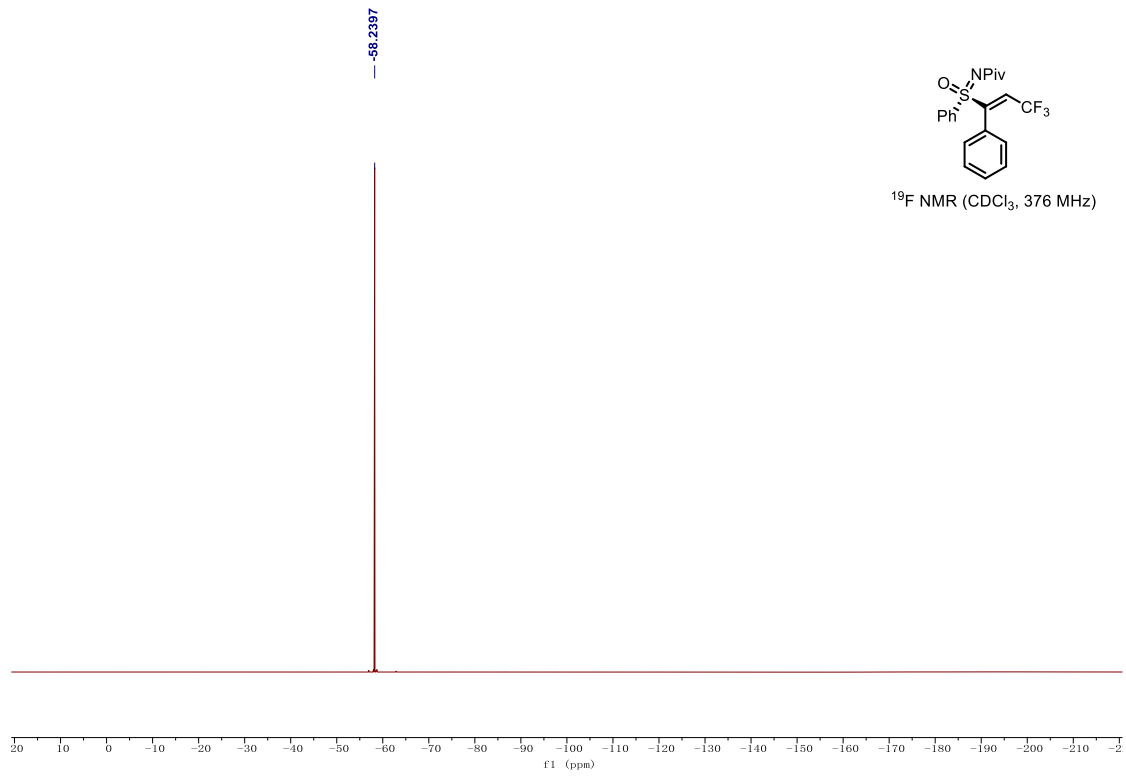

### <sup>1</sup>H NMR Spectrum of 6

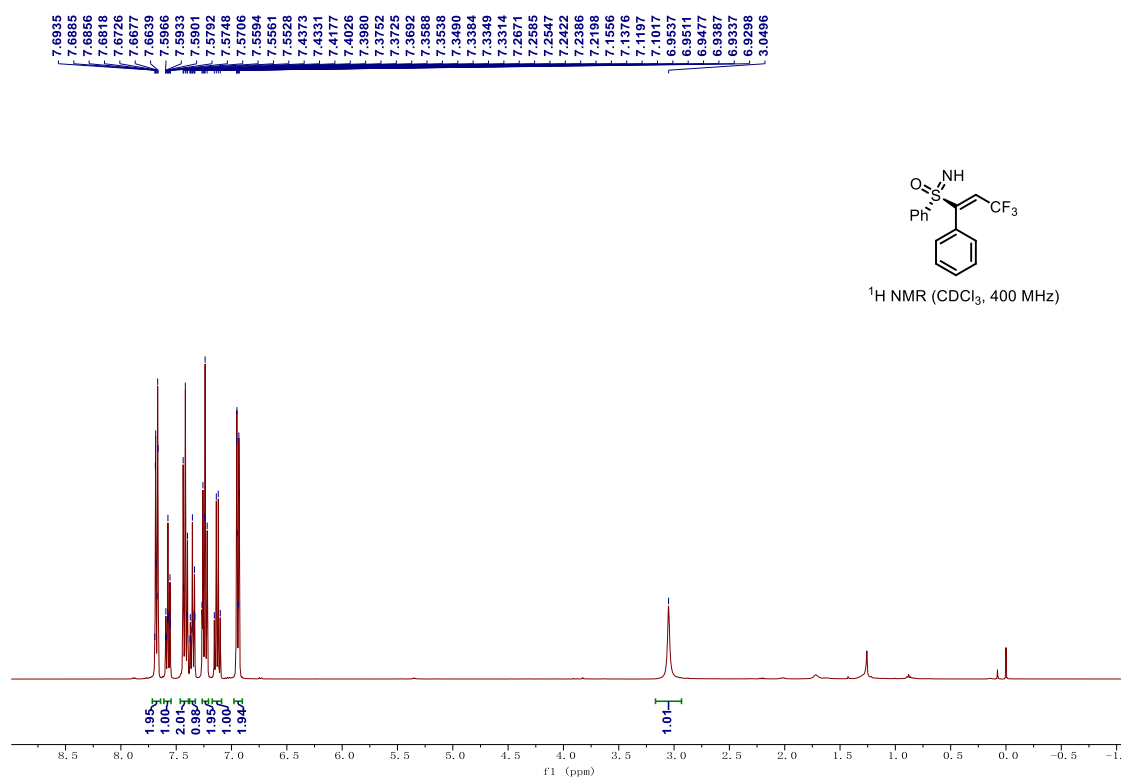

### <sup>13</sup>C NMR Spectrum of 6

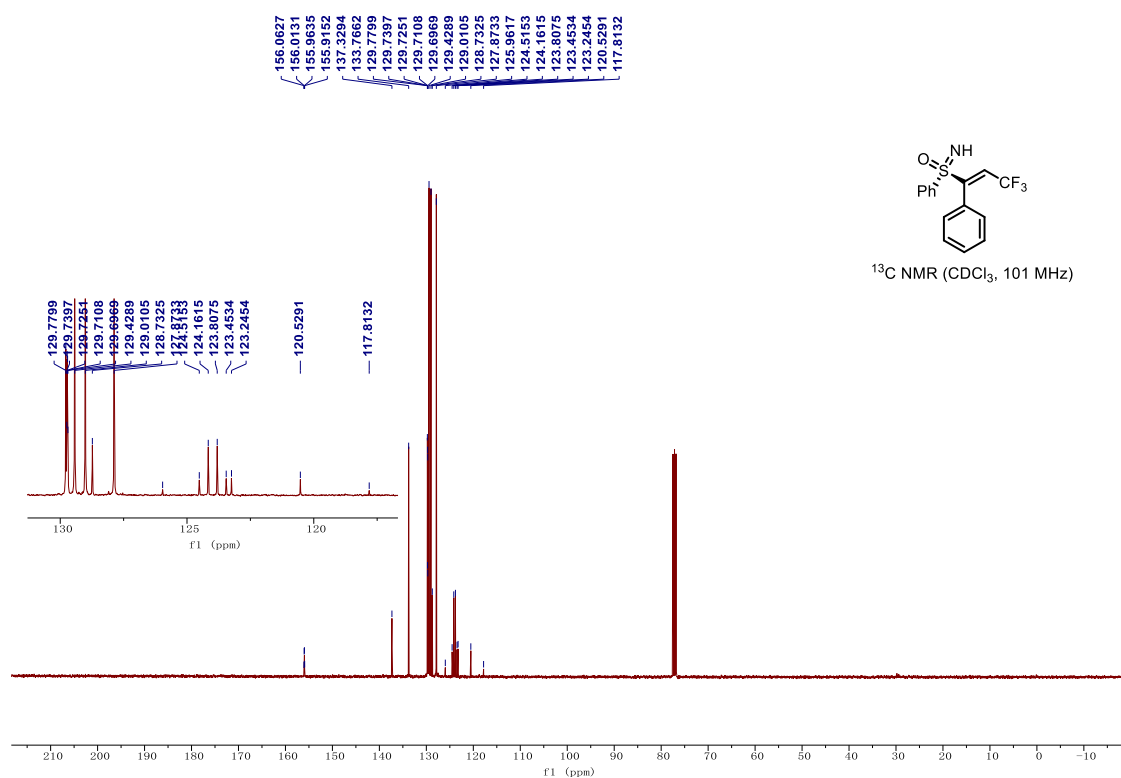

# <sup>19</sup>F NMR Spectrum of 6

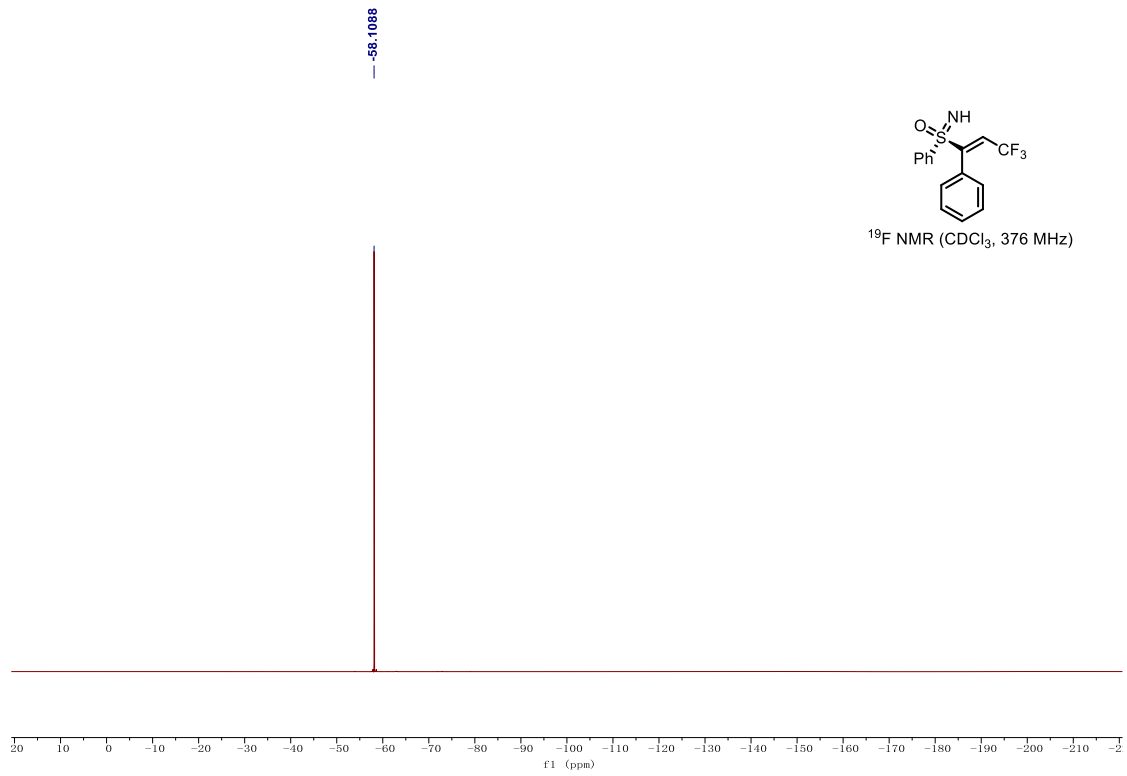

# <sup>1</sup>H NMR Spectrum of 7

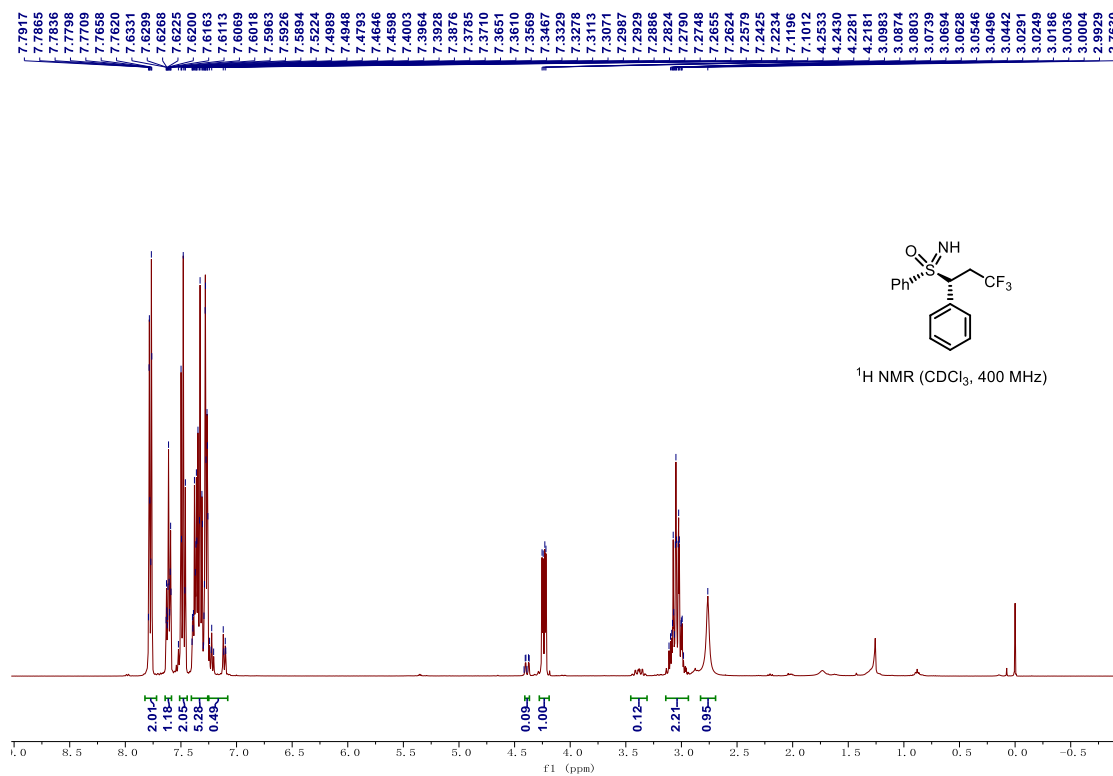

# <sup>13</sup>C NMR Spectrum of 7

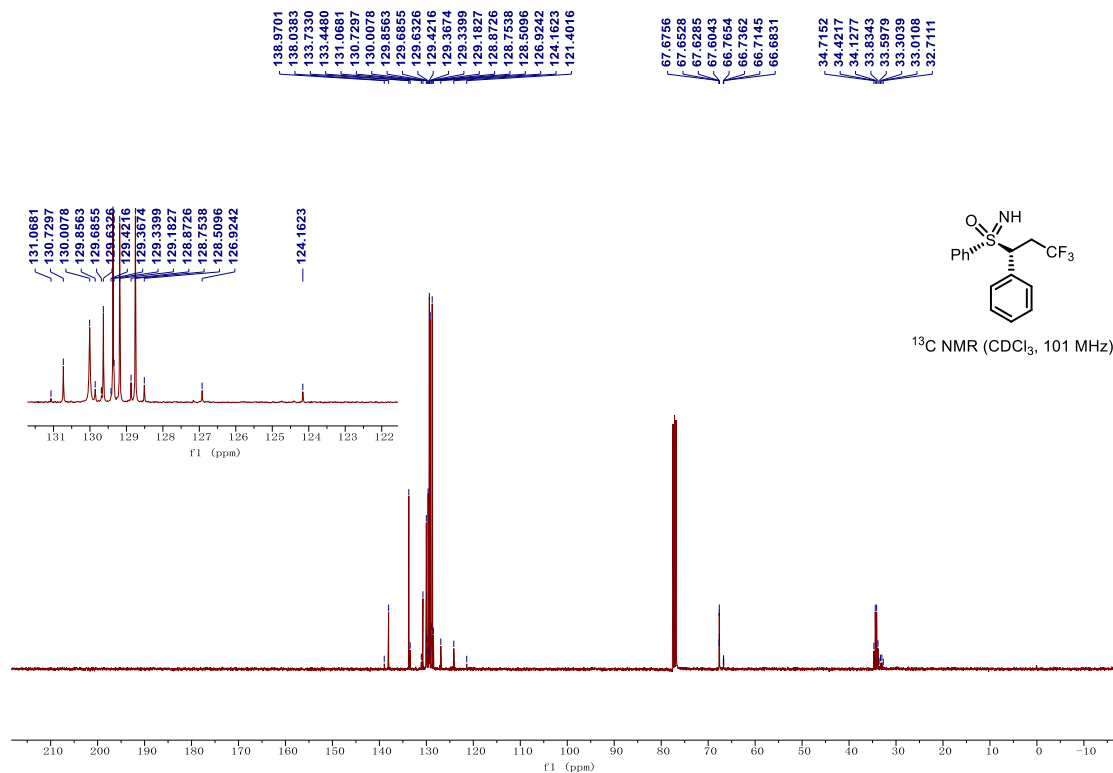

# <sup>19</sup>F NMR Spectrum of 7

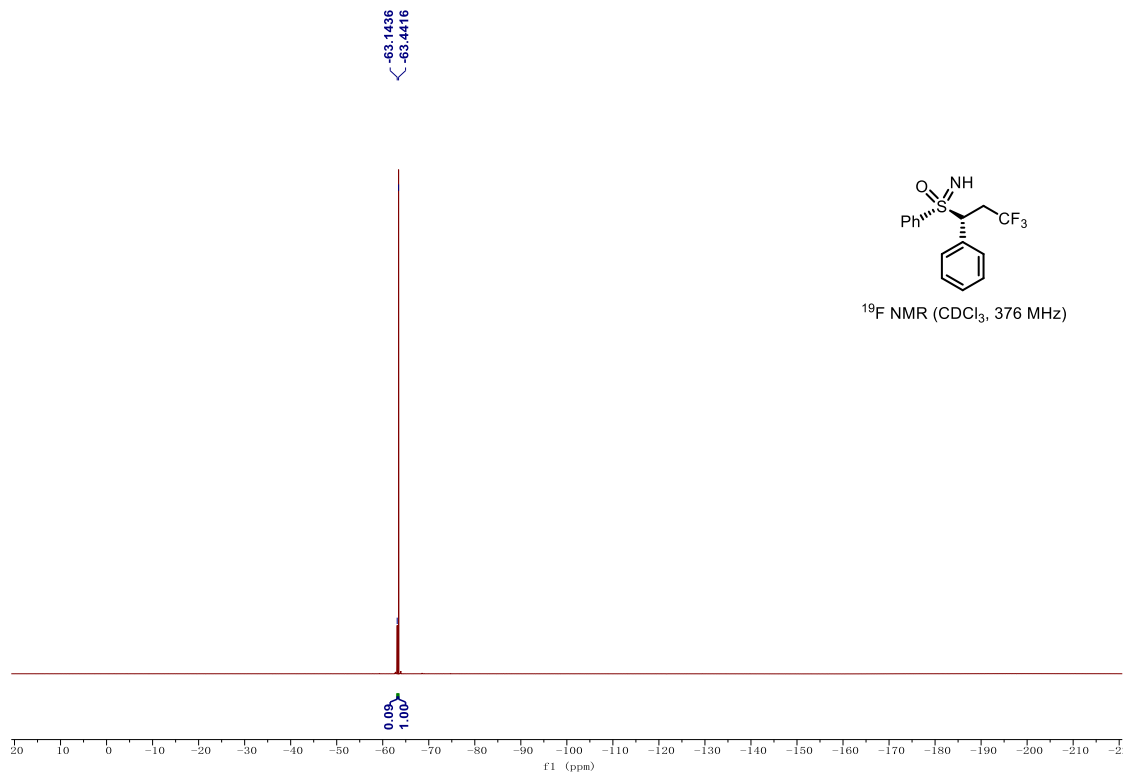

## 9. References

- (1). S. Li, J. Li, H. Zhang, G. Zhang and R. Guo, *Org. Lett.* 2025, **27**, 5057–5062.
- (2). R. Muta, T. Torigoe and Y. Kuninobu, *Org. Lett.* 2022, **24**, 8218–8222.
- (3). R. Ma, X. Qiu, H. Jiang and W. Wu, *Chem. Commun.*, 2024, **60**, 9578–9581.
- (4). Y. Zhang, H. Cao, S. Wei, Y. Li, L. Wang and L. Zong, *Chem. Commun.*, 2025, **15**, 13929–13937.
- (5). N. S. Greenwood and J. A. Ellman, *Org. Lett.*, 2023, **25**, 4759–4764.
- (6). Z.-K. Zhang, Y. Yuan, H. Peng, Y. Han, J. Zhang and J. Yang, *J. Org. Chem.*, 2024, **89**, 17609–17614.
- (7). A. T. Champlin, N. Y. Kwon and J. A. Ellman, *Angew. Chem., Int. Ed.* 2024, **63**, e202410773.
- (8). Q. Xiong, M. Liao, S. Zhao, S. Wu, Y. Hong, Y. R. Chi, X. Zhang and X. Wu, *Angew. Chem., Int. Ed.* 2025, **64**, e202500170.
- (9). Y. Chen, D.-M. Fang, H.-S. Huang, X.-K. Nie, S.-Q. Zhang, X. Cui, Z. Tang and G.-X. Li, *Org. Lett.*, 2023, **25**, 2134–2138.
- (10). M. Han, S.-Q. Zhang, X. Cui, Z. Tang and G.-X. Li, *J. Org. Chem.*, 2025, **90**, 13440–13448.
- (11). M. J. Frisch, G. W. Trucks, H. B. Schlegel, G. E. Scuseria, M. A. Robb, J. R. Cheeseman, G. Scalmani, V. Barone, G. A. Petersson, H. Nakatsuji, X. Li, M. Caricato, A. V. Marenich, J. Bloino, B. G. Janesko, R. Gomperts, B. Mennucci, H. P. Hratchian, J. V. Ortiz, A. F. Izmaylov, J. L. Sonnenberg, D. Williams-Young, F. Ding, F. Lipparini, F. Egidi, J. Goings, B. Peng, A. Petrone, T. Henderson, D. Ranasinghe, V. G. Zakrzewski, J. Gao, N. Rega, G. Zheng, W. Liang, M. Hada, M. Ehara, K. Toyota, R. Fukuda, J. Hasegawa, M. Ishida, T. Nakajima, Y. Honda, O. Kitao, H. Nakai, T. Vreven, K. Throssell, J. A. Montgomery, Jr., J. E. Peralta, F. Ogliaro, M. J. Bearpark, J. J. Heyd, E. N. Brothers, K. N. Kudin, V. N. Staroverov, T. A. Keith, R. Kobayashi, J. Normand, K. Raghavachari, A. P. Rendell, J. C. Burant, S. S. Iyengar, J. Tomasi, M. Cossi, J. M. Millam, M. Klene, C. Adamo, R. Cammi, J. W. Ochterski, R. L. Martin, K. Morokuma, O. Farkas, J. B. Foresman, and D. J. Fox, *Gaussian 16, Revision A.03*. Gaussian, Inc., Wallingford CT, 2016.
- (12). (a) A. D. Becke, *J. Chem. Phys.*, 1993, **98**, 5648–5652; (b) C. Lee, W. Yang and R. G. Parr, *Phys. Rev. B*, 1988, **37**, 785–789.
- (13). S. Grimme, J. Antony, S. Ehrlich and H. Krieg, *J. Chem. Phys.*, 2010, **132**, 154104.
- (14). S. Grimme, S. Ehrlich and L. Goerigk, *J. Comput. Chem.*, 2011, **32**, 1456–1465.
- (15). P. J. Hay and W. R. Wadt, *J. Chem. Phys.*, 1985, **82**, 270–283.
- (16). K. Fukui, *Acc. Chem. Res.*, 1981, **14**, 363–368.
- (17). Y. Zhao and D. G. Truhlar, *Theor. Chem. Acc.*, 2008, **120**, 215–241.
- (18). D. Andrae, U. Haussermann, M. Dolg, H. Stoll and H. Preuss, *Theor. Chim. Acta*, 1990, **77**, 123–141.

- (19). A. V. Marenich, C. J. Cramer and D. G. Truhlar, *J. Phys. Chem. B*, 2009, **113**, 6378–6396.
- (20). C. Y. Legault, *CYLview*, 1.0b. Université de Sherbrooke, 2009 (<http://www.cylview.org>).
- (21). Z. Wang, EnePro1.6 ([github.com/wongzit/EnePro](https://github.com/wongzit/EnePro)).
